# Supplementary material for: GmYUC2a mediates auxin biosynthesis during root development and nodulation in soybean
Source: PubMed Central journal article supplement — J Exp Bot. 2019 Apr 8;70(12):3165–76. doi: 10.1093/jxb/erz144 (PMC6598056; doi:10.1093/jxb/erz144), 2019-04-08
Supplement: erz144_suppl_supplementary_data_s1.pdf [file erz144_suppl_supplementary_data_s1.pdf]

**Supplementary Data S1. Predicted amino acid sequence of AtYUCs, GmYUCs, and MedtrYUCs.**

>AtYUC1(At4g32540)

MESHPHNKTDQQTQHIIIVHGPIIIGAGPSGLATSACLSSRGVPSLILERSDSIASLWKSPTY  
DRLRLHLPKHFCRLPLLDPEYYPKYPSKNEFLAYLESYASHFRIAPRFNKNVQNAAYDS  
SSGFWRVKTHDNTEYLSKWLIVATGENADPYFPEIPGRKKFSGGKIVHASEYKSGEEFR  
RQKVLVVGCGNSGMEISLDLVRHNASPHLVVRNTVHVLPREILGVSTFGVGMTLLKCLPL  
RLVDKFLLLMANLSFGNTDRLGLRRPKTGPLELKNVTGKSPVLDVGAMSLIRSGMIQIME  
GVKEITKKGAKFMDGQEKDFDSIIFATGYKSNVPTWLQGGDFFTDGMPKTPFPNGWR  
GGKGLYTVGFTRRGLLGTASDAVKIAGEIGDQWRDEIKGSTRNMCSSRFVFTSKS

>Glyma.14G128200

MGRSCNKSQQQHVEGPIIIGAGPSGLAVAACLSEDKVPFVILERRHNCIASLWQNKTYDRL  
KLHLPKQFCPLKGFPHTFPKYPTKYQFISYMESYASHFNIHPIFNQTVKSAEFDKGSN  
VWVVRTEEFYSSRWLVVATGENAEPVVPRIHGMELFGGAVAHTSVYKSGSEYRNKKV  
LVIGCGNSGMEVCLDLCRHNAKPYMVARNTVHVLPREMLGFSTFGIAMALYKWFPIKLV  
DKIILLATNLILGNTNHYGIKRPKTGPIELKLATGKTPVLDVMEGVKEITRNGAKFMDGKEK  
EFDAILLATGYKSNVPTWLKGCDFFTKDGMPKTPFPHGWKGEQGMVTVGFTRRGLHGT  
SCDAIKIAEDIAEQWRTVEDKSHCDSHIILLNNS

>Glyma.06G072100

MESLKAQEGGEEQVKCVVHGPPIIVGAGPSGLAVAACLSSHGVPYVILERTNCITSLWQ  
HRTYDRLKLHLPKHFCPLPLIPFLHFPKYPSNSYASRFNIRPRFNQSVQTAQFDPCSQL  
WVVKTNQGFQYISPWLVVATGENAEPVVPISGMDKFRGPIVHTSVYKSGSDYKNQRVLV  
IGCGNSGMEVSLDLCRHNANPYMVARNTVHVLPMEMFGFSTFGIAMALLKWLPIKLVDK  
LVLAAARLMLGDTARYGVRPRTGPIELKLVTKTPVLDVGQVAQIRSGNIKVMMEGVKEIT  
RNGAKFMDGQEKESAILLATGYKSNVPTWLKSCESFTKDGMPKTPFPMGWKGENGLY  
TVGFTRRGLLGTASDAVKIAKDIADQWMTVKDRSYCNSHIIFLKST

>Glyma.17G205800

MGSCNKPQQQQQHVQGPPIIIGAGPSGLAVAACLSEHKVPFVILERRHNCIASLWQNKTY  
DRLKLHLPKQFCPLKGFPHTFPKYPTKYQFISYMESYASHFNIHPIFNQTVESADFDK  
GSKVWVKTQEVDYSSRWLVVATGENAEPVVPRIHGMELFNGDVAHTSVYKSGSEYRN  
KKVLVIGCGNSGMEVCLDLCRHNAKPYMVARNTVHVLPREMFGFSTFGVAMALYKWFPI  
KLVDKIILLATNFILGNTNHYGIKRPKTGPIELKLATGKTPVLDVGQVAQIKCGNIKVMMEGVK  
EITRNGAKFMDGQEKESAILLATGYKSNVPTWLKGCDFFTEDGMPKTPFPHGWKGEQ  
GLYTVGFTRRGLQGTSCDAIKIAEDIAEQWRTVEDKSHCDSHIILLNNS\*

>Medtr3g109520

MDYCIRELEGKQANDPLFIKTMKNNKSSSTEGRVFVQGPVIVGAGPSGLAAAACLQQKN  
IPCILERSNCVASLWQLKTYDRLRLHLPKQFCPLPFMEFP  
SNFPTYPSKQQFIKYLEDYAGSFGIRPRFNETVQNAEFDGKIGCWRLKSFNSKADVTT  
YVCRWLIVATGENAEAVPNIEGVDEFGGVIRHTSLYKSGE  
EFRGKVLVVGCGNSGMEVCLDLCNHDATPSLVVRDSVHVLPREMLGKSTFGLSMWLL  
KWFLPLGLVDRFLLIVSWLMLGDTAQLGLDRPRLGPLQLKNLS  
GKTPVLDVGTAKIKGGHIKVRPSIKRLKRQTVFVDGRSENF DGIIILATGYKSNVPYWLK  
EEDMFSKEDGFFPMKPFPSGWKGKNGLYAVGFTKRGLQGA  
SLDAKRIADDIELCLESEAKYGS\*

>AtYUC2(At4g13260)

MEFVTETLGKRIHDPYVEETRCLMIPGPIIVGSGPSGLATAACLKSRDIPSLILERSTCIASL  
WQHKT YDRLRLHLPKDFCELPLMPFPSSYPTYPTKQQFVQYLESYAEHFDLKPVFNQTV  
EEAKFDRRCGLWRVRTTGKKDETM EYVSRWL VVATGENAE EVMPEIDGIPDFGGPILH  
TSSYKSGEIFSEKKILVVGCGNSGMEVCLDLCNFNALPSLVVRDSVHVLPQEMLGISTFG  
ISTSLLKWFVPVHVDRFLLRMSRLVLGDTDRLGLVRPKLGPLERKIKCGKTPVLDVGTLA  
KIRSGHIKVPELKRVMHYSAEFVDGRVDNFDAILLATGYKSNVPMWLKGVNMFSEKDG  
FPHKPFNGWKGESGLYAVGFTKLGLLGAIDA KKAEDIEVQRHFLPLARPQHC

>Glyma.08G038600

MLNMEYLKEVEGKSVHDYVEVKMGKMTKPI SVAGPVIVGAGPSGLAAAACLKQKGI PSLI  
LERADCLASMWQLKTYDRLCLHLPKQFCQLPLMPFPQNFPSYPTKQQFLAYLKAYADHF  
DIKPALSKTVISANFDHGCGYWRVKTQGLKKEETEYVCQWLIVATGENAE E VVPQIEGM  
SEFEGPILHTSSYKSGSMFGGKNVLVVGCGNSGMEVCLDLCNH DARPSLVVRD TVHILP  
QQMFGKSTFGLSMSLLKWFPMRLVDKFLLLMSHLILGDTAQFGLNRPKIGPLELKNLCG  
KTPVLDVGT LAHIKSGKIKVCRGIKQLAKHKVEFVDGKTENFDVIIMATGYKSNVPTWLKG  
SNMFCEKDGLPRKDFPNGWKG ENGLYAVGF SKRGLLGASIH SKRTAEDIEHCWKAANT  
TRV

>Glyma.05G231100

MLYMEYLKEVEGKTVHDYLEVKMGKMTKPIGVEGPVIVGAGPSGLAAAACLKQKGI PSLI  
LERDDCLASMWQLKTYDRLCLHLPKQFCQLPLMPFPQNFPSYPTKQQFLAYLKAYADH  
FDIKPALSKTVISANFDHRCGYWRVKTQGVKKEETEYVCQWLIVATGENAE E VVPQIEG  
MSEFEGPILHTSSYKSGSMFCGKNVLVVGCGNSGMEVCLDLCNHHARPSLVVRD TVHIL  
PQQMFGKSTFGLSLSLLNWFPMLVDKFLLLMSHLILGDTAQFGLNRPKIGPLELKNLCG  
KTPVLDVGT LAHIKSGKIKVCRGIKQLAQHKA E FVDGKIEDFDVILATGYKSNVPTWLKG  
SDMFCEKDGLPRKDFPNGWRGENGLYAVGFTKRGLLGAS F DAKRIAGDIEHCWKAAN

>Glyma.07G086200

MDYLKELEGKSVHDCYHQHQIKMSKMASPIFVPGPVIVGAGPSGLAAAACLKQKGI PSL  
VLERAQCLASMWQFKTYDRLRLHLPKQFCQLPLMPFPKNLPSYPTKQQFLAYLKAYADH  
FDIKPVFSQTVVSAEFDHVCHHWVKTQGV LKKEDTAEYVCQWLIVATGECAEEVVPQI  
EGMGEFEGQIVHTCKYKSGNKFCGKNVLVVGCGNSGMEVCLDLCNHNARPSLVVRD T  
VHILPQQMLGKSTFGLSMFLLKWFPIRFVDQFLLMSHLMLGDTDQFGLRRPKLGPL  
KNLYGKTPVLDVGT LTQIKNGKIKVCRGIKRLARNAVEFVDGKVENFDAILLATGYKSNV  
SWLKGSDMFSEKDGFP RKPFPNGWKG ENGLYAVGFTKRGLLGASIDAKRIAEDIEHSW  
KAEATHVLEFFCPLA

>Glyma.09G190700

MDYLKELEGKSVHDCYHHHQQQIKMSKMASPIFVPGPVIVGAGPSGLAAAACLKQKGI  
IPSLILERAQCLASMWQFKTYDRLRLHLPKQFCQLPLMPFPKNLPSYPTKQQFLAYLKAY  
ADHFDIKPVFSQTVVSAEFDHVCQLWRVKT RGVIKKEDTAEYVCQWLIVATGECAEEV  
PQIEGMGEFEGQIVHTSKYKSGSMFCGKNVLVVGCGNSGMEVCLDLCNHNARPSLVVR  
DTVHILPQQMLGKSTFGLSMFLLKWFPIRFVDQFLLMSHLMLGDTAQFGLRRPKLGPL  
ELKNLYGKTPVLDVGT LTQIKNGKIKVCRGIKRLARNAVEFVDGKVENFDAMVLATGYKS  
NVPSWLKGSDMFSEKDGFP RKPFPNGWKG ENGLYAVGFTKRGLLGASIDAKRIAEDIEH  
SWKAEAKHVLEFFRPLA

>AtYUC3(At1g04610)

MYGNNNKKSINITSMFQNLPEGSDIFSRRCIWVNGPVIVGAGPSGLAVAAGLKREGVPFI  
ILERANCIASLWQNRTYDRLKLHLPKQFCQLPNYPFPDEFPEYPTKFQFIQYLESYAANF  
DINPKFNETVQSAKYDETFGLWRVKTISNMGQLGSCEFEYICRWIVVATGENAEKVVPDF  
EGLEDFGGDVLHAGDYKSGGRYQGGKVLVVGCGNSGMEVSLDLYNHGANPSMVVRS  
AVHVLPREIFGKSTFELGVTMMKYMPVWLADKTIILFLARIILGNTDKYGLKRPKIGPLELK  
NKEGKTPVLDIGALPKIRSGKIKIVPGIIFGKGVKVELIDGRVLEIDSVILATGYRSNVPSWL  
KDNDFFSDDGIPKNPFPNGWKGEGLYAVGFTRKGLFGASLDAMSVAHDIANRWKEES  
KQQKKTAAARHRCISHF

>Glyma.10G128700

MHDICLNMPPMVQTFDPEDLFRRCIWVNGPVIVGAGPSGLAVAACLKEQGVFPFLILER  
ANCIASLWQNRTYDRLKLHLPKQFCQLPNFPFPDEFPEYPTKFQFISYLESYAKHFNISP  
QFNETVQSAKYDETFGLWRVKTIRKIKKLGEASSGCCGAVECEVEYICRWLVVATGENS  
EKVVPEFEGGLGEFGGHVMHACDYKSGEGYGGQKVLVVGCGNSGMEVSLDLNHNAN  
PSMVVRSVHVLPREAFGKSTFELAVMLMKRFLWMVDKILLVLARLILGNVEKYGLKRP  
SVGPLELKHTAGKTPVLDIGALEKIRSGKIKVVPGIRFFPGKVELVDGQVLQIDSVVLT  
GYHSNVPSWLKENDFFTSDDGTPRNPFPNGWRGKGGLYAVGFTRKGLSGASLDAINVAH  
DIAKNWKEENKQKRKTVAARHRCISHF

>AtYUC4(At5g11320)

MGTCRESEPTQIFVPGPIIVGAGPSGLAVAACL SNRGVPSVILERTDCLASLWQKRTYDR  
LKLHLPKHFCPLMPFPKNFPKYPKQFLFISYVESYAARFNIKPVFNQTVEKAEFDDAS  
GLWNVKTQDGVYTSWLVVATGENAEPVFPNIPGLKKFTGPVVHTSAYKSGSAFANRKY  
LVVVGCGNSGMEVSLDLCRYNALPHMVVRNSVHVLPRDFFGLSTFGIAMTLLKWFLPLKV  
DKFLLLANSTLGNTDLLGLRRPKTGPIELKNVTGKTPVLDVGAISLIRSGQIKVTQAVKEI  
TRNGAKFLNGKEIEFDSIILATGYKSNVPDWLKENSFFTKGMPKTPFPNGWKGEGLY  
TVGFTRRGLSGTAYDAVKIAEDITDQWMKFNGPLSCRNICSSHHIHLHFNKS

>Glyma.04G070100

MESLKGEEVKCVWVQGPPIIVGAGPSGLAVAACL SHHGVPYVILERSHCITSLWQHRTYD  
RLKLHLPKHFCPLMPFPLHFPKYPKQFLFISYLNYSYASRFNIRPRFNQSVQTAEFDPS  
SQLWLVRTNGFQYISPWLVVATGENAEPVPSISGMDMFHGPIVHTSVYKSGSDYNNQR  
VLVIGCGNSGMEVSLDLCRHNANPYMVARNTVHVLPREMFGFSTFGIAMALLKWLPKIV  
VDKLVLAARLMLGDTARYGVRPPTGPIELKLVTKTPVLDVQVAQIRSGNIKVMGEV  
KEITRNGAKFMDGQEKEFSAILATGYKSNVPTWLKSCESFTKDGMPKTPFPMPGWKGE  
NGLYTVGFTRRGLLGTASDAVKIAKDQWMTVKDKSYRNSHIILLKST

>AtYUC5(At5g43890)

MENMFRLMGSEDSSDRRCIWVNGPVIVGAGPSGLATAACL REEGVPFVLERADCIA  
SLWQKRTYDRIKLHLPKVCQLPKMPFPEDYPEYPTKRQFIEYLESYANKFEITPQFNEC  
VQSARYDETSGLWRIKTTSSSSSGSEMEYICRWLVVATGENAEKVVPEIDGLTTEFEFEV  
IHSCEYKSGEKYRGKSVLVVVGCGNSGMEVSLDLANHNANASMVVRSVHVLPREILGK  
SSFEISMMLMKWFPLWLVDKILLILAWLILGNLTKYGLKRPTMGPMELKIVSGKTPVLDIG  
AMEKIKSGEVEIVPGIKRFSRSHVELVDGQRLDLDAVVLATGYRSNVPSWLQENDLFSK  
NGFPKSPFPNAWKGKSGLYAAGFTRKGLAGASADAVNIAQDIGNVWREETKRQKMRTR  
VGHRCISVA

>Glyma.19G170800

MENLLRLVDHEDFFSRRCIWVNGPIIIGAGPSGLATAACLREQGVPMVLERADCIASLW

QKRTYDRLKLHLPKQFCQLPKLPPEDFPEYPTKKQFIEYLESYAKHFEINPQFNECVQS  
ARYDETSGLWRVKTVSSSGAAARGEIEYICRWLVVATGENAECVMPDIEGLSEFKGDVIH  
ACDYKSGESFRGKVLVVGCGNSGMELSLDLCNHASPSMVVRSSVHVLPREVFGIST  
FELAVMLLQWLPLWLVDKILLILAWFVLGNIEKLGLKRPSMGPLELKNTKGKTPVLDIGAL  
EKIRSGDIEVVPGIKRFNNGEVEFVNGEKLDIDAIVLATGYRSNVPSWLQEGEFFSKNGY  
PKMPFPHSWKGNAGLYAVGFTKRGLSGASSDAVKIAQDIGQVWKNETKQKKQRTTACH  
RRCISQF

>AtYUC6(At5g25620)

MEGKLAHDHRGMTSPRRICVVTGPVIVGAGPSGLATAACLKERGITSVLLERSNCIASLW  
QLKTYDRLHLHLPKQFCELPPIPPGDFPTYPTKQQFIEYLEDYARRFDIKPEFNQTVESA  
AFDENLGMWRVTSVGEEGTTEYVCRWLVAATGENAEPVPRFEGMDKFAAAGVVKHT  
CHYKTGGDFAGKRVLVVGCGNSGMEVCLDLCNFGAQPSSLVVRDAVHVLPREMLGTSTF  
GLSMFLLKWLPIRLVDRFLLVSRFILGDTLLGLNRPRLGPLELKNISGKTPVLDVGTAK  
IKTGDIVKCSGIRRLKRHEVEFDNGKTERFDAILLATGYKSNVPSWLKENKMFSKKGDFPI  
QEFPEGWRGECGLYAVGFTKRGISGASMDAKRIAEDIHKCWKQDEQLQCKL GKRMKR  
KFSESDCGGN

>Glyma.14G141200

MDYCLRELEGKQAHDLSLFLEKMKNLSQRTTTSERCWVVPGPVIVGAGPSGLATAAYLK  
EKGVPSLILERSNCIASLWQLKTYDRLHLHLPKNFCELPLMGFPCDFPTYPTKQQFIEYLE  
SYAERFHIRPRFNETVQHAEFDATLGFWRVKS LN KREVATEFVCRWLIVATGENAEAVP  
GIEGMGEFGGTIKHTSLYKSGEEFRGKRVLVVGCGNSGMEVCLDLCNH NATPSLVVRDT  
VHILPREMLGKSTFGLSMWLLKWLPIRFVDRFLLIVSWLMLGDTARFGLDRPKLGPLQLK  
NLSGKTPVLDVGTAKIKSGHIKVRPGIKRLKRYTVEFVDGR TENFDALILATGYKSNVPY  
WLKEEDMFSKEDGFPTKPPFNGWKGENGLYAVGFTKRGLLGASMDAKRIAEDIERCWK  
AKHSTSFSLSLNPQSNS

>Glyma.04G079700

MEYFLREIEGKQAHDPLFMNNKSSLSSSSSSSSFSTVWVHGPVIVGAGPSGLAAAACL  
REKSVPSVILERSNCIASLWQLKTYDRLRLHLPKQFCELPFMGFPSHFPTYPSKQQFVQ  
YLENYAERFGIRPRFNETVQHAEFDAKLGLWRVKSVDKAEKTTEYVCRWLIVATGENAE  
AVVPDIEGVEEFGAPIKHTSLYKSGEEFRGKRVLVVGCGNSGMEVCLDLCNH NATPSLV  
VRD TVHILPREMLGKSTFGLSMWLLKWLPIRLVDRFLLMVSWLLLGDTSKLGDRPRLG  
PLELKNLSGKTPVLDVGTAKIKGGDIKVRPGIKRLKRQTVEFVDGR TENFDAILLATGYK  
SNVPYWLKEEDMFSKEDGYPRRPFNGWKGRNGLYAVGFTKKGLLGASMDAKRIAEDI  
EQSWKAGANHRTTTFARSHLPQPNS

>Glyma.17G189700

MDYCLRELEGKQAHDPLFLQKMKNSSSQSTTTSSERCWVVPGPVIVGAGPSGLATAAY  
LKEKGLPSLILERSNCIASLWQLKTYDRLHLHLPKNFCQLPLMGFPCDFPTYPTKQQFIEY  
LESYAESFDIRPRFNETVRRAEFDATLGFWRVKSFNKKEVATEFVCRWLIVATGENAEAE  
VPEIEGMGEFGGAIKHTSFYKSGEEFRGKRVLVVGCGNSGMEVCLDLCNH NATPSLV  
RDTVHILPREMLGKSTFGLSMWLLKWLPIRFVDWFLIVSWLMLGDTARFGLDRPKLGP  
LQLKNLSGKTPVLDVGTAKIKSGHIKVRPGIKRLKRYTVEFVGGRTENFDAILLATGYKS  
NVPYWLKEDDMFSKEDGFPTKPPDGWKGENGLYAVGFTKRGLLGASMDAERIGEDIE  
RCWKEKHSSTSFSLSLNPQSNS

>Glyma.06G081300

MEYFLREIEGKQAHDPFLFMNNYNKSSSSSSSFSSSSSSTVWVHGPVIVGAGPSGLAAA  
ACLRDKSVPSVILERSNCIASPWQLKTYDRLRLHLPKQFCELPFMGFSPHFPNYPKQQ  
FVQYLENYAESFGIRPRFNETVQHAFFDGLGLWRVKSVDKVGKTTEYMCRWLIVATGE  
NAEAVVPDIEGVEEFGAPIKHTSLYKSGEEFRGKRVLVWCGNSGMEVCLDLCNHNATP  
SLVVRDTVHVLPREMLGKSTFGLSMWLLKWLPMRLVDRFLLMVSWLLLGDTSHLGLDR  
PRLGPLELKNLSGKTPVLDVGTALAKIKGGDIKVRPAIKRLKRHTVEFVDGRTENYDAIILAT  
GYKSNVPYWLKEEDMFSKKDGYPRRPFNGRKRGRNGLYAVGFTKKGLLGASMDAKRIA  
EDIEQCWETGANHRTTLAPSHLPQNS

>AtYUC7(At2g33230)

MCNNNTSCVNISMLQPEDIFSRRCIWNVPVIVGAGPSGLAVAADLKRQEVFVILER  
ANCIASLWQNRTYDRLKLHLPKQFCQLPNLPPFEDIPEYPTKYQFIEYLESYATHFDLRPK  
FNETVQSAKYDKRFGLWRVQTVLRSELLGYCEFEYICRWLVVATGENAEKVVPEFEGLE  
DFGGDVLHAGDYKSGERYRGRVLLVWCGNSGMEVSLDLCNHDAASPMVVRSSVHVL  
PREVLGKSTFELSVTMMKWMPVWLVDKTLVLRLLLGNLTKYGLKRPEIGPLELKNTA  
GKTPVLDIGAIMIKSGKIKIVAGIAKFGPGKVELVDGRVLQIDSVILATGYRSNVP SWLKE  
NDLGEIGIEKNPFPKGWKGKAGLYAVGFTGRGLSGASFDAMSVAHDIANSWKEETKQQI  
KTVATRHRRRCISHF

>Glyma.20G080000

MHDICLNMPPMVQTFDPEDLFTRRRCIWNVPVIVGAGPSGLAVAACLKDQGVFFILERA  
NCIASLWQNRTYDRLKLHLPKQFCQLPNVPPFEDFPEYPTKFQFISYLESYAKHFSIAPQ  
FNETVQSAKYDETFGLWRIKTIRKIKLGLSSGGCAECEVEYICRSLVATGENSEKVV  
PEFEGLGEGFGHVMHACDYKSGEGYGGQKVLVWCGNSGMEVSLDLCNHNANPSLVV  
RSSVHVLPREVFGKSTFELAVTLMKRFPLWVVDKILLILARLILGNVEKYGLKRPSVGP  
LEL KHTAGKTPVLDIGALEKIRSGKIKVVPGIRRFPLPGKVELVDGQVLQIDSVV  
LATGYHSNVP SWLKEDDFFNDGTNRNPPNGWRGKGLYAVGFTRRGLSGASLD  
AINVAHDIVKSWK EETKQKRKTVAARHRRRCISHF

>AtYUC8(At4g28720)

MENMFRLMDQDQDLTNNRCIWNVPVIVGAGPSGLATAACLHEQNVFVLERAD  
CIA SLWQKRTYDRLKLHLPKQFCQLPKMPFEDFPEYPTKRQFIDYLESYATRFEINPKFNEC  
VQTARFDETSGLWRVKT VSKSESTQTEVEYICRWLVVATGENAERVMPEIDGLSEFSGE  
VIHACDYKSGEKFAGKVLVWCGNSGMEVSLDLANHFAPSMVVRSSLVHMPREVMG  
KSTFELAMKMLRWFPLWLVDKILLVLSWMVLGNIEKYGLKRPEMGPMEKSVK  
GKTPVL DIGAIEKIRLGKINVPGIKRFNGNKVELVNGEQLDVDSVVLATGYRSNVP  
PYWLQENEFF AKNGFPKT VADNNGWKGRTGLYAVGFTRKGLSGASMDAVKIAQD  
IGSVWQLETKQPTK RSRGSLRRCISQQF

>Glyma.13G128800

MENLFRVDYEDMFSKRCIWNVPVIVGAGPSGLATAACLKQQGVFPMVLERAE  
CIASL WQKRTYDRLKLHLPKQFCQLPNLPPKDFPEYPTKKHFIDYLESYAQKFEINPRFNECV  
QCARYDETSGLWRVKT VATCGSAKSEFEYICRWLVVATGENAECVIPDIEGLGEFKGDVI  
HACEYKSGESFKGKVVVWCGNSGMELSLDLCNHNASPSMVVRSSVHVLPREVFGK  
STFELAVLMLQWLPLWLVDKILLVLTWLVLGNMERFGLKRPSEGPLLLKNTK  
GKTPVLDIG TLEKIRSGDIKVVPEIKRFSNGYVEFVNGEKQGVDAVVLATGYRSNVP  
SWLQEGEFFSK NGFPKSPFNGWKGNAGLYAVGFTRRGLSGASSDAMNIAQD  
IDQVWKQETRQKKQRT TACHRRRCISQF

>Glyma.10G041800

MENLFRLVDYEDMFSKRCI WVNGPVIVGAGPSGLATAACLKQQGVPFMVLERAECIASL  
WQKRAYDRLKLHLPKQFCQLPNL PFPKDFPEYPTKKHFIDYLESYAQKFEINPRFNECV  
QCARYDETSGLWRVKT VATCGAAKSEFEYICRWLVVATGENAECVIPEIEGLGEFKGDVI  
HACEYKSGESFKGKKVVV GCGNSGMELSLDLCNHNASPSMVVRSSVHVLPREVFGK  
STFELAVLMLQWVPLWLVDKILLVLAWLVLGNMERFGLKRPSEGPLLLKNTKGKTPVLDI  
GTLEKIRSGDIKVVPEIKRFTNGCVFVNGEKQHVDVAVLATGYRSNVPSWLQEGEFFS  
KNGFPKSPFPNGWKGNGGLYAVGFTRRGLSGASSDAMKIAQDIGQVWKQETRQKKQR  
TNACHRRRCISQF\*

>AtYUC9(At1g04180)

MENMFRLMASEEYFSERRCVWVNGPVIVGAGPSGLATAACLHDQGVPFV VVERSDCIA  
SLWQKRTYDRLKLHLPKKFCQLPKMPFPDHYEYPTKRQFIDYLESYANRFDIKPEFNKS  
VESARFDETSGLWRVRTTSDGEEMEYICRWLVVATGENAERVVPEINGLMTEFDGEVIH  
ACEYKSGEKFRGKRVLVV GCGNSGMEVSLDLANHNAITSMVVRSSVHVLPREIMGKST  
FGISVMMMKWLPWLVDKLLLILSWLVLGSLSNYGLKRPDIGPMELKSMTGKTPVLDIGA  
LEKIKSGDVEIVPAIKQFSRHHVELVDGQKLDIDAVLATGYRSNVPSWLQESEFFSKNG  
FPKSPFPNAWKGKSGLYAAGFTRKGLAGASVDAVNIAQDIGNVVREETKRQKMRRNVG  
HRRRCISVA

>Glyma.03G169600

MENLFRLVDNEDLFSRRRCI WVNGPIIVGAGPSGLATAACLREQGVPFMVLERADCIASLW  
QKRTYDRLKLHLPKQFCQLPKLPFPEDFPEYPTKKQFIEYLESYAKHFEINPQFNECVQS  
ARYDETSGLWRVKT VSSSSGAARGEVEYICRWLVVATGENAECVMPEIEGLSEFKGDVI  
HACDYKSGERFRGKKVLV GCGNSGMELSLDLCNHHSSPSMVVRSSVHVLPREVFGIS  
TFELAVMLLQWLPLWLVDKILLILAWFVLGNIEKLGLKRPSKGPLEMKNRKGKTPVLDIGA  
LERIRSGDIEVVPGIKRFNNGEVEFINGEKLDIDAVLATGYRSNVPSWLQEGEFFSKNGY  
PKMPFPHGWKGNAGLYAVGFTKRGLSGASSDAVKIAQDIGQVWKNETKQKKQRTTACH  
RRCISQF

>AtYUC10(At1g48910)

METVVVIVGAGPAGLATS VCLNQHSIPNVILEKEDIYASLWKKRAYDRLKLHLAKEFCQLP  
FMPHGREVPTFMSKELFVNYLDAYVARFDINPRYNRTVKSSTFDESNNKWRVVAENTVT  
GETEVYWSEFLV VVATGENGDGNIPMVEGIDTFGGEIMHSSEYKSGRDFKDKNVLVVGG  
GNSGMEISFDLCNFGANTTILIRTPRHVVTK EVIHLGMTLLKYAPVAMVDTLVTTMAKILYG  
DLSKYGLFRPKQGP FATKLFTGKAPVIDVGTVEKIRDGEIQVINGGIGSINGKTLTFENGH  
KQDFDAIVFATGYKSSVCNWLEDYEYVMKKDGF PKAPMPKHWKGEKNLYCAGFSRKG I  
AGGAEDAMSVADDIRSILATLKNN

>Glyma.04G213600

MEEVSVIIVGAGPSGLAISACL SQNFISHIILEKEDCSASLWRKNAYDRLKLHLASEFCVLP  
LMPHPPSAPTYLSKDEFVQYIDSYIACFNINPLYCRMVEFAAYDEVENKWRVEAKKTLLEG  
TSETYVAKFLVIATGENSEGYIPDVP GLESFEGEIVHSKYYKSGSKYETKEVLVVGCGNS  
GMEIAYDLNDWGANTSILIRNPVHVFTKELINEGMRMLKHLPVHVVDNIITSLANMEYGD L  
SKYGIYQPKKGP FHLKFITGRAPVIDVGTIEKIKEGAIKVIPSHIVRIENKKVIFENDAEKEFD  
VIVFATGYRSVANKWLKDYKYVLNDEGMPNND FPNHWKGD RGLYCAGLSNRGLFGVK  
MDVEAIADDINQTLKLH

>Glyma.06G152700

MEEVSVIIAGAGPSGLAISACLSQNSISHIILEKDDCSASLWRKNAYDRLKLHLASEFCALP  
LMPHSPSSPTFLSKDEFVQYIDSYIARFNINPLYCRFIEFAAYDEVENKWRVEAKNTLEGT  
REIYVAKFLVIATGENSEGYIPDVHGLESEFEGEIMHSKYYYKSGSKYESKEVLVVGCGNSG  
MEIAYDLNDWGANTSILIRNPVHVFTKELINEGMRMMKHLPIHVVDTIITSLANMEYGDLS  
KYGIYQPKKGPFLKFITGRAPVIDVGTIRRIKEGAIKVIPSHIVRIENKKVIFGNDVEKKFD  
VIVFATGYISVANKWLKDYKYILNDEGMPKNDFPNHWKGDRLGLYCAGLSNRGLFGVKM  
DAEAIADDINQTLKLH

>AtYUC11(At1g21430)

MEKEIKLVLIIGAGPAGLATSACLNRNLNIPNIVERDVCSASLWKRRSYDRLKLHLAKQFC  
QLPHMPFSPNTPTFVSKLGFINYLDYATRFRVNVNPRYNRNKVSAYFKDGQWIVKVVNKT  
TALIEVYSAKFMVAATGENGEGVIPEIPGLVESFQGGKYLHSSEYKNGEKFAGKDVLLVGC  
GNSGMEIAYDLSCNANVSIVVRSQVHVLTRCIVRIGMSLLRFFPVKLVDRCLLLAELRF  
RNTSRYGLVRPNNPFLNKLITGRSATIDVGCVEIKSGKIQVVTSIKRIEGKTVEFIDGNT  
KNVDSIVFATGYKSSVSKWLEVDGDLFNENGMPKREFPDHWKGNGLYSAGFGKQG  
LAGISR DARNIARDIDSLVCGRSSKNKLSK

>Glyma.06G120700

MEIEVPVIVGAGPAGLATAACLNKYSIPNVVLERDDCHASLWRKRAYDRLKLHLGKDFC  
NLPHMPFPDFPTFVPRVDLRYLDNYVTRFKISIRYNRNVESASMDENNGKWRVVK  
DTTNADEVYVANYLVVATGENSEGYVPQIEGLEGFEGKMHMCSEYLNDRDLYGKHVLLV  
VGCNSGMEIAYDLNWDGANTSIVVRGPVHYFTKEMVYVGMSELLKYFKIEKVDKMLLM  
SKLKYGDMSNYGLIRPKDGPFFLKKKGGTTPTIDVGCVSRIKKGEVKVFPFAISSIKEDKLIE  
FEDGQNGQFDVIFATGYNSTVLKWLKDYRGLFNENGMPKPDFPNHWKGENGIYCAGF  
SRRGLDGIADFADAKRIAADIKKTVNIKNL PSEEDNFASFLLK

>Glyma.04G242500

MNSQAYKSSTQQREENHQSHCITNLKPKHQQTMEIEVPVIVGAGPAGLATAACLNKY  
SIPNVVLERHDCHASLWRKRTYDRLKLHLGKDFCNLPHMPFPLDFPTFVPRVDLRYLD  
NYVTRFKISIRYTRNVEASVDEENNGKWRVVKDTTNADEVYVADYLVVATGENDEG  
YVPQIEGLEGFEGEHMHC SQYLNDRHLYGKNVLLVVGSGNSGMEIAYDLSTWGANTSIVI  
RGPVHYFTKEMVYVGMSELLKYFKMEKVDKMLLM SKLKYGDMSEYGLVRPKDGPFFLKI  
KGGTTPTIDVGCVSRIKKGEVKVFPFAISSIKDKMVEFEDGQNGQFDVIFATGYNSTVLK  
WLKDYRGLFNENGMPKPSFPNHWKGNNGIYCAGFSRRGLDGIADFAQRIADDIKKTLN  
ARNLPGDEEDNFASLKLK

>Medtr1g008380

MDCYLRELEGKQAHDPFLFIEKMINNNKNSTSSSDRCLWIPGPLIVGAGPSGLAVAAYLKQ  
KGVPSLILERSNCIASLWKLKTYDRLRLHLPKQVCELPLM  
EFPSGFPTYPTKQQFIEYLESYSKNFDIRPWFNETVMHAEFDATLGFWRVRSEGKAGM  
VTEFVCRWLIVATGENAEAVVPEIEGVDEFVGSIRHTSLYKS  
GEEFRGKKVLVVGCGNSGMEVCLDLCNHDAAPSIVVRDSVHILPRDMLGKSTFGLSMW  
LLKWLVPVQLVDHILLTVSWLMLGNTERFGLVRPRLGPLELKK  
LSGKTPVLDVGALAKIKRGDIKVRPGIKRLKRYTVEFADGSTENFDAILATGYKSNVPYW  
LKDKGMFSKEDGYPRKPPNGWKGENGLYAVGFTKRGLL  
GASMDAKNIAEDIERCWKA EAKHIFPQSNS\*

>Medtr1g011630

MDPFKEKVKCVWIHGPIIVGAGPSGIAVAACLSEQGVPSLILERSDCIASLWQNRTYDRLK

LHLPKHFCELPMMSFPQTFPKYPTKHQFISYMESYADHF  
HIHPRFNQTVLSAEFDSTSQIWMVRTKEGDFQYFSPWLIVATGENAEPVFPTIHGMEHF  
HGPVVHTSDYKSGSEYKNKKVLVIGCGNSGMEVSLDLCRHN  
AMPHLVARNSVHILPRDMFGFSTYGIAMGLYKWLPLKLVDFLLLVSSFFLGNTNHYGIK  
RPKTGPIELKLATGKTPVLDVGQIAQIKSGNIKVMIEGVKE  
ITRNGAKFLDGGQEKEFDAILLATGYKSNVPSWLKGNDFFTKDGMPKTPFPHGWKGEQGL  
YTVGFTRRGLHGTYFDAIKIAEDITNQWKTLSKSKCCDSHI  
ILLNNS\*

>Medtr1g046230

MPPMSQTFDPEDILKNRCILVNGPVIVGAGPSGLAVAACLKQNVFPVFLERANCIASLW  
QNRTYDRLKLHLPKQLCQLPNFPFPDFHFPEYPSKFQFISY  
LESYAKNFNITPNFNETVLSAKYDETFGLWRIKSNRIKSDKVVEVEYICRWLVVATGENSE  
KVVEFEGLSDFGGNVMHACDYKSGVNYSGKNVLVVGCG  
NSGMEVSLDLNHNANPSMVRSSVHVLPREIFGKSTYEVAVMLMKRLPIWMVDKILLG  
LTRVILGNVEKYGLKRPCMGPLELKNTSGKTPVLDIGALEK  
VRSGEIKVVSGIKRFSQGKVELVDGKVLDDSDVVLATGYRSNVPSWLKENEFFSKDGMP  
KDPFPNGWKGAGLYAVGFTRRGLSGASLDAISVSQDIAKS  
WKEENKQRKKTVAARHRCISHF\*

>Medtr1g069275

MENLIRLVDNEEDAVSHRCIWNVNGPIIVGAGPSGLATAACLKQQGVPMVLERSNCIASL  
WQKRTYDRLKLHLPKQFCQLPNFPFPQEFPEYPTKKQFIN  
YLESYAKHFEINPRFNECVQSAKYDETNGLWRVETVSNGNEVEYICRSLVATGENAEC  
VVPYIEGLGGEFKGEIHHACDYKSGESFRGKVLVVGCGNS  
GMELSLDLNHNANSPSIVLRSSVHVLPREVFGKSTFGLAVMMMKWLPVWIVDKILLILAW  
LVFGNIEKYGLKRPLEGPLELKNTKGKTPVLDIGTLEKIR  
SGHIKVVPGIKRFTNGYVELVNGEKNQVDAVVLATGYRSNVPSWLKEGEFFSKNGFPKS  
PFPNGWKGTVGLYAVGFTKRGLSGSSYDAKQIAQDIAQVWK  
QEIKQKKHCTNACNKRCISQF\*

>Medtr3g088925

MEVEIPVVIVGAGPGGLATSACLNKHSISNIILEKDDCHASLWRKRAYDRLKLHLGKDFCN  
LPHMPFSPDFPTFVPRVDFLRYLDDYVTHMKICIRYNRY  
VNDASFDATNGKWRVCVHDTTLNLDEIYVADYLVVATGENCDPYIPMINGLESFEGEYLH  
CSKYLNRPWYDKNVLVVGSGNSGMEIAYDVSTWGANTSM  
VIRSPVHYLTKEMVYIGMSLLKYISIEKIDKLMVFMMSKMVYGDMSKYGLVRPKDGPFAMK  
KGGRTPTIDVGCVKQIKKGVKVPYPAISSIKKGIIEFA  
DGKSGQFDVIVFATGYRSSVQKWLKDYKELFNENGMPPKARFPDHWKGENGIYCAGFS  
QNGLQGIHFDALKIANDISFTVNAMKHHDAEANAIEKLLDE\*

>Medtr3g088945

MEVEIPVVIVGAGPGGLATSACLNKHSISNIILEKDDCHASLWRKRAYDRLKLHLGKDFCN  
LPHMPFSPDFPTFVPRVDFLRYLDDYVTHMKICIRYNRY  
VNDASFDATNGKWRVCVHDTTLNLDEIYVADYLVVATGENCDPYIPMINGLESFEGEYLH  
CSKYLNRPWYDKNVLVVGSGNFGMEIAYDVSTWGANTSM  
VIRSPVHYLTKEMVYIGMSLLKYISIEKIDKLMVFMMSKMVYGDMSKYGLVRPKDGPFAMK  
KGGRTPTIDVGCVKQIKKGVKVPYPAISSIKKGIIEFA



DGKSGQFDVIVFATGYRSSVQKWLKDYKELFNENGMPPKARFPDHWKGENGIYCVGFS  
RNLQGIHFDALKITNDISFTVNAMKHHADANA\*

>Medtr3g088955

MEVEIPVVIVGAGPGGLATSACLNKHSISNIILEKDDCHASLWRKRAYDRLKHLGKDFCN  
LPHMPFSDFPFVPRVDFLRYLDDYVTQMKICIQYNRY  
VNDASFDVTDGKWRVCVHDTTLNVEIYVADYLIVATGENCDPYIPMINGLESFEGEYLH  
CSKYLNGRLWYDKNVLVVGSGNSGMEIAYDVSTWGANTSM  
VIRSPVHYLTKEMVYIGMSLLKYISIEKIDKLMVFMVKMNGDMSKYGLVRPKDGPFAK  
KGGRTPTIDVGCVKQIKKGVKVPYPAISSIKKGIIEFA  
DGKRGQFDVIVFATGYRSSVQKWLKDYKELFNENGMPPKARFPDHWKGENGIYCVGFS  
QNLQGIHFDALKIANDISFTVNAMKHHDAEANAIEKLLDE\*

>Medtr4g051642

MEIEMPVVIVGAGPGGLATSACLNKHSISNIILEKDDCHASLWRKRTYDRLKHLHGKDFCN  
LPHLPIPSDLPNFVPRVDFLRYLDNYVNHFKICIRYNRY  
VDDASFDVKSGKWRVCVRDNRLNIDEIYVADYLVVATGENCDEYIPMINGLESFEGEYLH  
SSKYLNGRSWYDKNVLIVVGSGNSGMEIAYDVSNWGANTSI  
VIRSHMHLTKEMVFGMCLMKYLSVEKVDKLLVFMVKMMYGDMSKYGLIRPKGPFPSI  
RVRTGRPPSIDVGCIMIKKGVKVPYPTISRIKKGKIVEFV  
DGKSGQFDVIVFATGYRSNVLEWLKDYKELFNENGMPPKGCYPNHWKGENGLYCAFSR  
RALQGIVYSSQKIANDISLTIDAKKLLAEAVEVNARIKLLDE\*

>Medtr5g033260

MQEFTVVIVGAGPSGLAISACTQNSISHIILEKDDCCASLWRKNAYDRLNLHLASEFCSL  
PLMPHPPSGPTYLSKYQFLQYIDKYVAHFNIKSHYCRTV  
ESAKYDEIRSEWRVETKNTIEGILEVYEAKFLVIATGENSEGYIPNVPGLNNFEGEVHVK  
NYKSGSKYKTKVLLVVGCGNSGMEIAYDLHNSGANPSIV  
VRSPFHVFNREIHHQGMVMKYFSVGVVDTIITLWAKLKYGDLSKYGIYRPKLGPFLNKN  
VTGKSAVIDVGTVEKIKEGSIKVVSSYITRIEKKVVFEN  
NMEKEFDAIVFATGYKSIANGWLKDYKYALNEKGMPKNAYPSHWKGDHGLYCAGLARR  
GLSGVKIDAESIAEDINQTFNFHN\*

>Medtr6g086870

MAHDHQKDKSMGKSRLVHGPIIVGAGPSGLAAAACKQKQKIPSIQILANCLASMWQLK  
TYDRLRLHLPKQFCQLPLMPFPKGLPSYPTKQQFLSYLKAY  
ADHFDINPIFGKQVNAEFDVVCVFWKIKTQEIMKNGDEIIIYELCKWLIVASGENAEVV  
PQIEGMEQFQGPILHTSLYKSGSMFCGKNVLVVGCGNSG  
MEVCLDLCNHNAHPSLVVRDTHILPQQIFGKSTFGLSMWLLKWFVQFVDFKLLMSD  
LILGDTSQFGIERPKIGPLELKNLYGKTPVLDVGTVAQIKT  
GKIKVCKGIKRLAHNAVEFVDGKVENFDAILATGYRSNVPSWLKGSMDMFSEKDGFPKRP  
FPNGWKGEKGLYAVGFTKRGLLGSSIDAKRIAEDIETSWK  
SIKAKPLA\*

>Medtr7g099160

MDMDLDEETILLYENVLKTARAKAVENPNDDVDNLLDCAGALLTLHNKDFTTSKEMLE  
EAVTKFKKVTENPDLHRPFWALGKTLTAQAILFSTRAEA  
KDHVELAYDYFLKAVEKNPKNKLYRISLQEAACKAPGRGPFTSAGFKQSAGTADPSSAG  
TENVPGTCPFSSAGTKRSIGTAGLSSSAGTEDPSNLPDVP

LDGDAKVCE SIDPPASRFISYLENYANKFEINPQFNQCVQSAKYDETSGLWRVKTNEVEY  
ICRWLVVATGENAECVTPEIEGLSEFKGEVVYACDYKSGK  
NFEGKKVLVVGCGNSGMELSLDLSNHHALPSMVVRSSVHVLPREIFGISTFELAVMMLK  
WLPLWIVDKLLLILTWFILGDMEKYGIKRP SMGPLQLKNTV  
GKTPVLDIGALEKIRSGDINVVPGIKRINKNGEVELVNGEKL DIDAVVLATGYRSNVPSWL  
QEGEFFSKNGYPKMPFPHGWKGN SGLYAVGFTKRGLSGA  
SSDAVKIAQDIGK VVKQETKQKKQRTTACHRRCISQF\*

>Medtr7g099330

MENLFR LADHQDFLSRRCI WVNGPVIIGAGPSGLATAACLREQGV PFVVLERADCIASLW  
QKRTYDRLK LHLPKQFCQLPNLMPEDFPEYPSKKQFISY  
LENYANKFEINPQFNQCVQSAKYDETSGLWRVKTNEVEYICRWLVVATGENAECVTPEIE  
GLSEFKGEVVYACDYKSGKNFEGKKVLVVGCGNSGMELSL  
DLSNHHALPSMVVRSSVHVLPREIFGISTFELAVMMLKWLPLWIVDKLLLILTWFILGDME  
KYGIKRP SMGPLQLKNTV GKTPVLDIGALEKIRSGDINV  
VPGIKRINKNGEVELVNGEKL DIDAVVLATGYRSNVPSWLQEGEFFSKNGYPKMPFPHG  
WKGN SGLYAVGFTKRGLSGASSDAVKIAQDIGK VVKQETKQ  
KKQRTTACHRRCISQF\*

>Medtr8g432640

MQEFTV VIVGAGPSGLAISACTQNSISHIILEKEDCCASLWRKNAYDRLNLHLASEFCSL  
PLMPHPPSGPTYLSKDQFLQYIDKYVEHFNIKPCYCRMV  
ESA EYDEVGNKWRVQTKNTQDDTLEVYVS NYLVIATGENSEGYIPNVPGLGNFEGEVM  
HSKYYKSGSKYESKNVLVVGCGNSGMEIAYDLHNWGASASIV  
IRNPLHVFTREMIHQGMRMVKYL PVHIVDTYITLLAKLKYGDLSKYGIYRPKEGPLHLKNI  
TGKSAVIDVGTIGIKI KEGAIKVPSNITRIEKKKIVFEN  
NVEREFDAIVFATGYKSIANGWLKDYKYALNDKGMPKNAFPKH WKGDRGLYCGGLARR  
GLWGVK VDAESIAQDINQNLNLHD\*

## Predicted genomic sequence of AtYUCs, GmYUCs, and MedtrYUCs.

>AtYUC1 (At4g32540)

ATGGAGTCTCATCCTCACAACAAAACACTGACCAGACCCAGCATATCATCCTCGTACACG  
GTCCCATCATCATCGGAGCTGGCCCTTCTGGTCTTGCCACTT  
CAGCATGTCTCTCGAGCCGTGGAGTCCCTTCTTTGATCCTAGAACGGTCGGATTCAA  
TAGCATCTCTATGGAAATCTAAAACCTACGACCGACTCAGACT  
CCATCTCCCAAAACACTTTTGGCCGTTACCCCTCCTGGACTTCCCTGAATATTACCCA  
AAATACCCCTTCCAAAACGAGTTCTTGGCCTACCTTGAGTCC  
TACGCTTCCCACTTCCGCATCGCTCCAAGGTTCAACAAGAACGTACAAAACGCAGCT  
TACGATTCTTCCCTCCGTTTCTGGAGAGTAAAGACTCATGATA  
ACACAGAGTACCTCTCAAATGGCTTATCGTAGCCACCGGTGAGAACGCAGATCCAT  
ACTTCCCCGAGATTCCAGGGAGAAAAGAAGTTTTCCGGCGGAAA  
AATCGTTCACGCGAGTGAGTACAAAAGCGGCGAAGAGTTCCGGCGGCAGAAAAGTTT  
TGTTTGTGCGGATGTGGAAATTCGGCATGGAAATTAGCTTAGAC  
CTCGTCCGACATAACGCATCTCCTCATCTTGTTGTCCGGAACACCGTAAGTATAAACT  
CTTTTTTTTTTTAATTACATTTTTGAAATTTCCCTATCGT  
TTTGTTCATATAAACGAGATGTTACCACCATTTCTATTAGGTTTCATGTGTTGCCAAG  
GGAGATACTTGGGGTATCAACATTTGGAGTTGGAATGACAC  
TTCTCAAATGCTTACCCTTAAGGCTCGTTGACAAGTTCTTGTTATTGATGGCCAATCTT  
TCGTTTGGAAATACCGACCGGTTGGGCCTTCGCCGACCAA  
AACGGGTCCGCTTGAGCTGAAAAATGTCACCGGCAAAAGTCCGGTTCTCGATGTGCG  
GAGCTATGTCTCTCATCAGATCCGGCATGATTCAGGTGAGTGTA  
AGTCTTGAACATATCTCTTTCTATTTATTTATTTTCTAATTTAGTGACAATTTTGC  
GTAGCCAAGAGCGGGCACCTTTTAGTAATTTATTTATA  
AATTATAAATCTGTATAGCATAACGGAATCATATTGTATTACTATTAGCCAACCTTTCTAAAA  
GAACCGGTTTATGTTGAAACTGGTAACTACAAAAGAACT  
TGTTTTAAATGTTACTTTGATGATTTTTATTTCTCTTTCTTGCCAATGTTTTCTAGTCT  
TAAAGAATGTTTTCTTGTTTCATGGTGACAGAAAAAGTTA  
ATTTTTGTTTGTAGCATTTTCTATTTATGCTTCCGTAAACCAATTTCTTTTCGTCGTGCG  
TCATGATTCCATAACCCATGTTCCGACTTACTCGTTTC  
TACTTTCTTCTTAACAAATACTCTATCTAAATACATGACTTGCCAAACACTTACACAC  
ATATAGTCATATACATACCTAATATTAGTGTGTTGTCTTT  
TCTTATTGTTAAAAAATGAAGATAATGGAAGGTGTAAAGGAAATAACAAAGAAAGGAG  
CAAAGTTTATGGATGGTCAAGAAAAGGACTTTGACTCTATCA  
TATTTGCCACTGGTTACAAAAGCAACGTGCCTACTTGGCTTCAGGTATGCATTTGTATA  
TGCAATTCACATCTATAATCCCCACTCAGAATTATTCAA  
AACAAAATTAACATCAACGGCCTTTTCTATGATTATTAGGGAGGTGATTTTTTACGGA  
CGATGGGATGCCGAAAACGCCGTTTCTAACGGCTGGAGAG  
GAGGGAAAGGATTGTACACAGTTGGTTTTACGAGAAGAGGACTCCTTGGAACGGCG  
TCTGACGCCGTTAAGATCGCTGGCGAAATTGGTGACCAGTGGAG  
AGACGAAATCAAGGGGTCCACCAGGAATATGTGCAGTTCTCGTTTTGTCTTTACCTCT  
AAATCCTAATTTGCGTTTTTCACTTCTTTTTTTGTTTGTTA  
AAGTTACCACCTAATTTTGTGTTGTAAATCGAAGTAATAAACTTGTACAGATTTT

>Glyma.14G128200

AAAACCAAGAAGAACCAGCCTCGAGAGTAAGAGAATCAAATCCTTTCCTTAACCTTCA  
CGCCTCAATTTTCTCTTCTCTCTCTTTTTCTCCTCCCATGC  
ATTAATTA AAAACCTTTTTTCTATTTTTTTTTTCACTTTCTCATTTC CCCACTTCACACT  
CCTTTAAATTCCCACAAGAAACCGAGGTTCCAACCTCCA  
CTTTTCAGCTCCTCAACTCTCTCACCCCTTGGTTCCACTACAATTTTTTCTTCCTTA  
TCTATCTATCTATCTTACATGGGTCGTTCTTGCAACAAATC  
CCAACAACAACATGTTGAAGGCCCTATCATTATAGGTGCTGGTCCTTCGGGCTTAGC  
CGTGGCTGCGTGTCTCTCAGAAGATAAAGTTCCTTTTGTGATT  
CTTGAGAGACACA ACTGCATAGCCTCCCTTTGGCAAACAAAACCTACGACCGTCTC  
AAACTCCACCTCCCTAAACAGTTCTGCGAGCTTCCCTTGAAGG  
GCTTTCCCCACACTTTCCCAAATACCCACAAAGTACCAGTTTATCTCTACATGGA  
GTCCTATGCTTCACACTTCAACATTCACCCCATCTTCAACCA  
AACTGTGAAAAGTGCTGAGTTTGATAAAGGGTCAAATGTTTGGGTTGTTAGAACTGAA  
GAGTTCGAGTATTCTTCTCGCTGGCTAGTGGTGGCCACTGGA  
GAAAATGCTGAACCTGTTGTGCCTAGGATTCATGGGATGGAGCTTTTTGGTGGTGCT  
GTTGCTCACACTAGTGTGTATAAGTCTGGCTCTGAGTATAGGA  
ACAAGAAGGTTTTGGTCATTGGGTGTGGCAATTCGGGTATGGAAGTTTGCTTGGACC  
TTTGTAGACACAATGCCAAACCTTACATGGTTGCTAGAAATAC  
AGTAAGTCTATTCACCCTAGTTTTGGTTCGTATTTGGATAAATTTTTTCGTAAGTACTCG  
AGATAAAATAAAAATTAATAATTTTTTTTTCATAGTTAAAAA  
CCAACTTATGCAACTTAGCTTTTGAAAATGTTCAATAAAAAGACTTTTTTTTTATAAAAA  
TCAAAGTGATAAGTTGATTTTAATTAATTA AAAAGTTTA  
ATTTATTTTACTTTCTTAATAAAAATTAAGCCATATAAGTATACTTTCTTTAAAAAATAAT  
TTTGCTATTCTTTCAATTTGGGTGACCTATGTAAACCCC  
TAAAAAAGTTTTTATCAAGTTATTGAAGTGAAAATTGCAGTTTTATTTAAAAAAAATAA  
GGCTAAAGTCACTTTTTGTTTCATGGACTAAAGTGGGATTT  
CCTTTTTGTAAATGGGTGATATTTAGTGTTTATCATGAGTATTGTACTGTTCACGA  
CTGAAATTGACGTCATTTATGTTTTTTTTTCCCATTTGGG  
TAACTAATGACCAAGCTTGGGGGAGTATGCTTTTTTGTCACTTTGTTGCATATGATTG  
AAGGTACATGTGCTTCTTAGGGAGATGTTAGGCTTCTCAAC  
GTTTGGGATAGCTATGGCGCTCTATAAGTGGTTTCCCATTAAGTTAGTAGACAAGATC  
ATCTTGCTTGCAACAACTTAATCTTGGGCAACACCAATCAC  
TACGGCATCAAGAGGCCCAAACCGGCCCAATAGAGCTCAAACCTGCCACAGGGAA  
AACTCCAGTCCTGGATGTGGGCAAGTTGCACAAATAAAATGTGG  
TAACATAAAGGTATATTATATGCTTCAAATTAAGTGACCCCAAGTTTTTAATGTTATTCTT  
TCTTTTTTGAATATGTTGTTCTAGCGGACGTTTCTTCTT  
TCGACCACGTTTCCTCGTGATTTTTAGTTTTGTGGGTTTCAGTTGTCTTTTATTA AAAA  
AATAAATAAATAAATTCAAGTGACCCCATTAATGTTGATTCA  
GGAGTATTGTGTTTTTGGGAATTGTAGGGGGCCTAAGATTTCGATGTTGGGGTTGTT  
TGTGCAGGTGATGGAGGGTGTGAAGGAGATAACAAGAAATGGT  
GCCAAATTTATGGATGGAAAAGAAAAGGAATTCGATGCTATAATCTTGGCAACAGGAT  
ACAAGAGCAACGTGCCTACTTGGCTCAAGGTTAGTAATTTTG  
ATCTGTTGTTGTGTTGCGTTTTTAGCTCTATCTTATTATGACCCACTTATGACATGTCTG  
CTATCTTTGGCTTTGGGACACATGCGATGCAGAGAGCACAA

GCCTACAAATGTCTTCTTTTCTTCTTCATTCTTCATTCCAAAGATAACGAATAAAATCAG  
TTTGGGGCCTGTGCTTTTGGGCTCTACCACTTTTTTTTTAT  
AAAAAATAAATTAATTTTGTTTTTGTGTATGCATAGTTTCTCTCGAATTGATTATTA  
AAACTCTGCTTTCATAGTGACGTTTTGTGATGTGTAACG  
ATCATGAAAATCTCGTTGGCAACTTGTAAGGTGTCACACCTAAAAAGTATTCCTTGT  
GCACCACCTTTTGGTCAAATTCCTTTTGTCTCAAATTAATT  
AATTAGTAATCAAATTCCTTTTGTGTTGGTAAAGGGTATGTCTAAAAGTTAACATTCT  
CTTATTCTATTATAAGATTACAATTACAACTCCTATGTT  
AATTCCTTTATGACATGGTATGTTTTATGATCATATGATTGAAAACCTTGATCATTTTTTT  
TCTAATTCAGGGATGTGATTTTTTTACGAAAGATGGAAT  
GCCGAAAACGCCCTTTCCTCATGGGTGGAAAGGAGAGCAGGGAATGTATACGGTGG  
GGTTCACAAGAAGAGGTCTTCACGGAACGTCGTGTGATGCAATC  
AAGATCGCTGAAGACATAGCTGAACAGTGGAGAACCGTAGAGGACAAGAGTCACTG  
CGATTCACATATCATCCTACTCAATAATTCATAGACCTTACTTT  
TCCCCCAAATAAAATATGCAAGTTTTTAAGGTAAAAAAGAAAATTGGAGAAG  
GAGAAATATGGAGTTAGGATTACCTGGGCAATTGGACTACT  
TTTTTTTTTTTTCTTATTACTTCTTTTTACCCTCTCTTTTCTGTTTTCTGTGCATGTA  
CATGCAATTTTGTATCTTAGGAGCATAACGCTTTTTCTAAC  
CACTCAAGTTTTACTAGCCTTGACAAAACAGTTTCATAAATGGAATGGTACTATAAAA  
GTGCAGAGCAGATGTATCAAGAG

>Glyma.06G072100

ACACCCCTCTAGCCACACTCCCTGGACTAGTGCCTTCACTGACTCACCATTCCCAC  
TTCTTTAAATCCCACAAGAGGGGTACCACTGGGGGGCAAGAA  
ACAAATACACAAAGAAAGAAATAATTAACAGGGTCTTCTTCTTCTTTCCAAGTTCT  
TTAATCCCTTCCTTTCTTGGGATTTTCTTGCTGAGAATATC  
ATGGAGTCCTTAAAGGCGCAAGAAGGAGGAGAGGCAAGTGAAGTGCGTGTGGG  
TTCATGGCCCTATCATCGTAGGAGCAGGACCCTCAGGGCTAGCCG  
TCGCCGCGTGCCCTCTCCACCACGGAGTACCCTACGTCATTCTCGAGAGAACAAC  
TGCATAACCTCACTTTGGCAACACAGAACCTACGACCGCCTCAA  
ACTCCACCTCCCTAAACACTTCTGCGAACTCCCCTTAATACCCTTTCCCTCCATTT  
CCAAAATACCCCTCCAACCTCCTACGCTTCACGCTTCAACATC  
CGCCCCAGGTTCAACCAGTCCGTTTACAGACCGCCAGTTTCGACCCTTGTCTCAGCT  
TTGGGTCGTCAAACCAATGGTTTTTACAGTACATTTCCGCCGTGGC  
TTGTGGTTGCTACTGGAGAGAATGCTGAACCCGTTGTTCCCTCGATTTCTGGCATGG  
ACAAGTTTCGCGGACCCATTGTTTACACCAGCGTCTATAAATC  
TGGTTCTGATTACAAGAACCAGAGGGTTTTGGTTCATTGGTTGCGGCAACTCGGGTAT  
GGAAGTTAGCTTGGATCTTTGCAGGCACAACGCCAACCCCTTAC  
ATGGTTGCAAGAAACACAGTATGTAACCTAACCATGTACTAGTAGTGTATACACATGTAC  
TCTTGTTCATGATGTTTTTCTCATTGGGTAACACT  
TAAATATGAACAAAACCTAGATGCAGTTACTTAATTAATTGTTTTTCAATCAGATTTGA  
AGTTTTATTTGGACAATTTGTATTGATCTTTAATAAAGAT  
ATCTTTGATAAAGGTTTGCATTAATATCTTCATTATTCACTTTATCCGTCTAAATGTAAT  
TGTTATATAAGAAAAAATATTCTAAAACAATTATATTT  
TAATTTTTAATATAATATAAATATTTTTTTTTATTTATTTTTTATGATACACAATAAAATTT

ATAAATTAATTAATGATGATATAAGGTTAATTTTT  
TTAAAAATAATTATTATTTATTTATTAGTTTTCTTAATAAAATATTTTAGACAATAATTATT  
TTAAGATGGAGGGAGTAGTATTTACATTAAGATCA  
ATCTTTATATATGCATGTTTATGCAGGTGAAACTCTAACTTTGACTAAGAACTACATCT  
AAGACTCCAAGTTTTGCCGTTAAAATATGATAAATAATGG  
TCAAAGTGTGTGTGTTGACTCATGGTTTTATGGTACAGGTACATGTTTTGCCTATGG  
AGATGTTTTGGGTTTTCGACGTTTGAATAGCTATGGCTCTCT  
TGAAATGGCTTCCAATAAAGTTAGTAGACAAGTTGGTTTTGGCGGCGGCTAGGTTAAT  
GTTGGGTGACACCGCTCGCTATGGCGTTAGAAGGCCCAAAC  
AGGGCCTATCGAGCTCAAAGTACCAGGAAAACCCCTGTGCTTGATGTTGGACA  
AGTCGCTCAAATAAGATCCGGTAACATCAAGGTACATCTGTAT  
TTAAATGAAACCAAATTATATAACCATGCTTCGTTTTCTGATAATAATGTACTTTAAAAAT  
GCAATTAAGCAGCTATTCAATTTTGCTAAGTTTGGTTAG  
GGTTTGTGTCAGGTGATGGAAGGAGTGAAGGAGATAACAAGAAACGGTGCCAAGTT  
TATGGATGGACAAGAAAAGGAGTTCAGCGCTATAATATTGGCGA  
CGGGATACAAAAGCAACGTGCCACTTGGCTTAAGGTAAAAAAGGAAAACA  
AAAAAATTGACCTTAATTGCCTTCTGCATGTTACCTCTATC  
TTGCATATATATATATATCAGCAATCCAAGTATTTCTTTTCTTATTGCTCTATTTTCTTAA  
AGGCATATATACACTTTTTGAAGATCTGAAAAACCTTT  
ATTTTGCATTTTATTTCAGTTTATTTTTATTTAATCAAAAACAATAATTATCTCTTATATATA  
TTCTAAAATAGTAGTACTAGTATTTTCATACGTACAAG  
CACTTGTTGAGTCAGTTGGTGGTTTTGGGAGTTGGGACATGCATAGCAGAAACCAACA  
AATGGGTTCTTTTCTTCATACAACAACAATGAAAGAAAGAGAA  
TAAATGACTTTGGGTTGCAAATTTGAACTTTTTTCATTCTAGTGAAGTTTCATGTGAA  
ATATCCCGTTAGCTACTTGTAAAATCACACCTAAAACAATG  
CCCCTTTTGTTCCTTTCCGTCGTTCCGAGTTTTGAAATGCTTCTGAGTTGAAAACTGC  
AGTAATCTGATTTGTTCCCTTCTCAGCGTTCCCTTCTTCTTTGT  
TATCCAAACCAGTTTTTTGAGTTTTCTTTTTCTGGGTCAGGCAAATGATCAGTGCAT  
GCCAGCCATCACTAAAATGACAAAATTTACAACCTCCCCATT  
TAATCATGATTTTTTTTATAATAATTACTTTTAAAAATAATTTGTGATTGATTTGTATACTC  
AACAAATAGCATGCCTATTAATTAATTAATTTATG  
AAACTGCAGAGTTGTGAATCTTTCACGAAAGACCGAATGCCTAAAACGCCGTTTCCA  
ATGGGTTGGAAGGGAGAGAACGGATTGTATACAGTGGGGTTCA  
CGAGAAGAGGTCTTCTTGAAGTGCATCGGATGCCGTAATAATTGCTAAAGACATCG  
CTGATCAATGGATGACCGTTAAGGACAGATCATACTGTAATTC  
CCACATCATCTTTCTCAAGAGTACATAGGATCACGTGTAATAAAAATGTCCTGAATTT  
TTTTTCTACCTCTTTACAGAGTTTTTTTTTTTTTTTTTTT  
TGTATGTACAATTTTGTATTTGCAGTTCAACAGCATTTTTGTGTCTAAACTTTTACCTC  
TTGGCTTTGTGTTTAAAATTAACAGTTAAGTTCCTAAA  
TGAA

>Glyma.17G205800

TTTTCACTTTTCAGCTCCTTCATAAACTCTCTCTCACCTTTAGTTGCTACTACTACAA  
CTTTTTCTTTCCCTATCTATCTATCTTACTTACATGGGTT  
CTTGCAACAAACCCCAACAACAACAACAACATGTTCAAGGCCCTATTATCATAGG

AGCTGGTCCTTCAGGCTTAGCCGTGGCTGCGTGTCTCTCAGA  
ACACAAAGTTCCTTTTCGTAATTCTTGAGAGACACAACCTGCATAGCCTCCCTTTGGCAA  
AACAAAACCTACGACCGTCTCAAACCTCCACCTCCCTAAACAG  
TTCTGCGAGCTTCCCTTAAAGGGTTTTCCCCACACTTTCCCAAATACCCCACAAAGT  
ACCAAGTTCATATCCTACATGGAGTCCTACGCTTCACACTTCA  
ACATTCACCCTATCTTCAACCAAACCGTGGAAAAGTGCTGACTTTGATAAAGGGTCGAA  
GGTTTGGGTGGTTAAAACCTCAAGAGGTTGATTATTCTTCTCG  
CTGGCTTGTGGTGGCTACTGGTAAAATGCTGAACCTGTTGTGCCTAGGATTCATGG  
GATGGAGCTTTTTAATGGTGTGTTGCTCACACTAGCGTGTAT  
AAGTCTGGCTCTGAGTATAGGAACAAGAAGGTTTTGGTCATTGGGTGTGGTAATTCG  
GGAATGGAAGTTTGCTTGGACCTTTGTAGACACAATGCCAAAC  
CTTACATGGTTGCTAGAAATACAGTGAGTCTATTACCTTTATTTTAGTTAATATTTGGA  
TAACTTTTTTCATAAATACTCGAGATGAAACAAATCAAAC  
TTCCTTTCAGAGTAAAAATCAACTGCAACTTAACTTTTTAGAAAAGCTGGATAAAAAAA  
GATTTTTTATAATAGTTAAAGTGTATAAGTTGATTTTAATT  
TATACAAAAAAGTTTGATTTATTTACCACCCATTTAGGTATACTTGAATATTTTTTTATG  
CTATTTTTTTCCTTTGAGTGACCTATGTAAACCTTTAACA  
AAAGTTTTTATTAAGTTAATATTGAAGTGAAAATTCAGTTTTAGTTTTAAAAAATAAGG  
CTAAAGTCACTTTTTGTTTCATGGACTAATGTGGGATTTT  
TTTTTTGTTAAATGGGTGATATTTAGTGTTGATCATGAGTGTATAACTGTTCAAGACTGA  
AAATGATACGTCAATTTATGTTTTTTTTTTTCCATTTGGGT  
AACTAATGATCAAGCTTGGGGGAGTATGCTTTTTTGGTCACTTTGTTGCATATGATTAT  
TGAAGGTACATGTGCTTCCCTAGAGAGATGTTTGGCTTCTCA  
ACATTTGGGGTTGCTATGGCGCTCTATAAGTGGTTTTCCATTAAGTTAGTAGACAAGA  
TCATCTTGCTTGCAACAACTTCATTTTGGGCAACACCAATC  
ACTATGGCATCAAGAGGCCCAAACCGGCCCAATAGAGCTCAAACCTCGCCACAGGG  
AAAACCCCAGTCCTTGATGTTGGTCAAGTTGCACAAATAAAATG  
TGGAACATAAAGGTATACACAATATGGTTCAAATTAAGTGACTCCATTGTGTCTTTTTT  
TACCGAAAAATGTTAGTATGTTAGAATATTAGTTTTTGT  
AGTCCAGGGGATCCAACCTCGTGACCCTAATATTGATTCAGGAGTAATGTGTTTTTGGG  
AAATTGTTAGGGTGCTAAGATTGTTGTTGGGGTTGTGTAGG  
TGATGGAGGGTGTGAAGGAGATAACAAGAAATGGTGCCAAATTTATGGATGGACAAG  
AAAAGGAATTCGATGCTATAATCTTGGCAACAGGATACAAGAG  
CAACGTGCCTACTTGGCTCAAGGTTAGGAATTTGATCTGTTGTGTTGCGTTTTTAGCT  
CTATCCTATTATGAACCACTTATGACATGTCACTATCTTGGC  
TTTGGAACACATGCAATGCAGAGAGCACAAACCTACAAATGTCTTCTTTTCTCTTCT  
TTCTTCATATTCCAAAGAGAACGAATAAAATCAGTTTGAGGC  
CTGTGCTTTTGGGCTCTACCACTTTTTTTTTATAAATAAAAAACATTTTTTTGTGTGTGC  
ATAGTTTCTCTCGAATTAATTGATGTGTTAAAACCTCTGC  
TTTCTCATAGTGACGTTTTGTGATGTGTAACGATCATGAAAACATTTGTTAGCAACT  
TGAAAAGTCTCACCAAAGAGTATTCCTTGTGCGCCACCT  
TTTGGTCAAATTCCTTTTGATTCAAATTATTAATTATAATCAAATTGTTTTTGTGTGGT  
TAAAGGGTATGTATAGAAGTTAACATTCTTATTCTT  
ATTATAAGATTACAATTACGAACTCCTATGATAATCCCTTTATGACATGGTGGTATGTTT

TATGATGGTATGATTGAAAACCTATTTTTTTTAATTTCC  
CTAATTCATCAGGGATGTGATTTTTTCACGGAAGATGGAATGCCCAAACACCCTTTC  
CTCATGGGTGGAAAGGAGAGCAGGGATTGTATACGGTGGGGT  
TCACAAGAAGAGGTCTTCAAGGAACGTCGTGTGATGCAATCAAGATCGCTGAAGACA  
TAGCTGAACAGTGGAGAACCGTAGAGGACAAGAGTCACTGCGA  
TTCACATATCATCCTACTCAATAATTCATAGTGCTTACTTTTACCCACCCCAAATAAATA  
TGCAAGTTTTTACTATTTGTTAAGTAAAAAAAATGGAGA  
AAGGAGAAATACGGAGTTAGGATTACCTGGGCAATTGGGCTAGTTCCCC

>Medtr3g109520

CACCATCCTTCTCACTCAGTCTCTCTGTGATATGAATGCTGATTTAGCCCCGTAGT  
TGTTGCTCATCCTCCGCTTAACCCTCCTCCACAAGAAAAAC  
ATTCTTCATTCTTCATTTTAAAAACAAGTGGATAAGACCCTCTTTGAATTCATCCATTCC  
AAGTTTTAAGCAAAAACACTTCTTCATAAGCCTAACCCCT  
TTACCACACACCAAACCTCATCTCAACCTAATCAAACATACTCATATTATTTTTATTTATG  
TCTTTTCTCTCTAACGCGGTTTCTTCATAGCCATTTCT  
CTCTCTCAAACACTTTTTGTTTTCTTTCTTCATGGACTATTGCATAAGAGAGTTAGAA  
GGAAAACAAGCTAATGATCCTTTATTCATCAAACAATGAA  
AAACAACAATCATCATCAACGGAAGGTCGTGTCTTTGTTCAAGGACCGGTGATCGT  
AGGAGCAGGACCTTCTGGTTTAGCAGCAGCTGCATGTCTACAA  
CAAAAAACATTCCATGTGTAATACTAGAAAGATCTAATTGTGTGGCTTCATTATGGCA  
ACTCAAACCTACGATCGATTGCGTCTTCATCTTCCAAAAC  
AATTCTGTGAATTACCCTTTATGGAATCCCCTCAAATTTCCCAACATACCCTTCAAAA  
CAACAGTTCATAAAGTACTTGGAAAGATTATGCAGGGAGTTT  
TGGTATTAGGCCACGTTTAATGAGACAGTGCAAATGCTGAATTTGATGGTAAAATT  
GGTTGTTGGAGGTTGAAGAGTTTTAATAGTAAAGCTGATGTA  
ACAACAGAATATGTTGTCGTTGGTTGATCGTAGCGACCGGTGAGAATGCCGAAGCT  
GTTGTGCCTAATATTGAAGGCGTAGATGAATTTGGAGGAGTTA  
TAAGGCATACAAGTTTGTATAAAAGTGGTGAAGAGTTTAGAGGGAAGAAAGTTTTGGT  
TGTTGGTTGTGGTAATTCTGGTATGGAAGTTTGTTTAGATCT  
TTGTAACCATGATGCTACTCCTTCTCTTGTGTTTCGAGATTCAGTAAGTAACTCTTCTT  
TTAACTATTATAATGGTTTTTCGTAATAAGAGAAGAAAAAAT  
TGTTTTATGTAAGTTTTTATTTTTCAAAGTTTTGTCTCTTTATTTAGAATTTTTTGTTT  
GATTTGATGAAGGAAAAAAAAAAAAAAAAACAATTTAACTA  
TCATAAGAGACACTCACTTTTTGATTTCTACTTCCCTTTAATTGGTTTTTTGCACTTTT  
GACAAATTTCAATGCATACATACACAAGCTAATTTAATTA  
ATCTCCATTTCCAATTTTTTAGGTTTCTATTTTTTCCACCAGAATAATATAATTTTTTTT  
TTTTCAATCAAGCACTACCTCCCAATAAAAAAATGTAA  
TTTTGAACTTGATATCCTCCACAAGTTTGATTTTTAATCTCACAAATTTGCGATGAGTTG  
TAAAAACAAAGCCCTTGTTTGATTCTTCTTGCTTTGCATG  
CACCCATAGTTTCAAGTTCGAAATAGATTTTGTTCAAAGAAAAAGAAGAAGCTTTT  
GTATTTGTTTACAAAACACAATAATTTCAAAGACTTGATC  
ATTTTATTGCACTTTCTTGATTCTCAAGCATGCGGAACATGGGCATGATGTTGATTCA  
TGACTAAATGGTTCTTTTTCTTTCTTATTATTTTTTTTT  
CAATCTTCTTTTTTCCACCACACCCATGATTTTTCTGGGTGTTTTCCCCACATAGAGCA



TGGCCTAAGCCTGCAACAACATTACATTAGGCAGCCAAAGT  
CCTCGTACCTTTT GCCCCCACTGCTTTTTTTTTGGTTTGACAATGAAAGTACTATTTCAT  
GGTTTATATGATATCATTATATATTTAATTTACTTTACTAT  
GGTTAATTTTATAAATGAAGGTACACGTCCTACCACGAGAGATGCTAGGAAAATCAAC  
TTTTGGGTTGTCCATGTGGTTACTCAAGTGGTTTCCATTGGG  
ACTTGTGATAGGTTCTTGCTCATAGTGTGCATGGCTTATGCTTGGTGACACTGCTCAA  
CTTGGGTTGGATCGTCCTCGTTTGGGTCCCCTTCAACTCAA  
AACCTCTCCGAAAGACTCCTGTCTTAGATGTGGGTACCCTTGCCAAAATTAAAGGT  
GGACACATTAAGGTACTTTCCGAATATTTCCCTTTCTATCAA  
TCAAATTACACCATGCTAGCTAGCTTTATAAGTTAGAATTTAATTGAGATTTGGTCGTGA  
AATGGTTTGTAGTCGAGCCTAAGTCTATGTTTTGATTGG  
TCTTGAGTTTGAAAATATCATGGCAGCACCAATATTTTATTGAAATTTTTATCAAAAAA  
TTTAGTTGCACACTATCAAACATACTCTAAAACAACA  
TCATTATTTTCTACGAATGATTATTGATAAGATGTAATGTGAATTTTGGGTTATGGTGGC  
TCTAGTATTAGTTGGTTGGAGAATTTTGTGTACTTTTT  
TAATTATTTTATAATATTTTCTCGATGGTGTTCATTTTTTATAAATAAGAACTAATGGT  
GGAACCTAATTATTTCTTTTTGCTTTATACATCAAGT  
GCAACTACATTTCTTCTCTATCTCTCTTTTTATATATTTAATTAATGAAATGAAATG  
GCTTCTTAATTTGTTCCACCTCTTTATTTTTCTTGGC  
AAGATTTTTTCATCATTATGTGATTTCAATCAAATCATGGACGAAAGCACAATTGGTTAAT  
TTTGATTATTTAATTCCAAAGCTAATCAACAAAAA  
TTGGTTAATCATTATTTGAATCATGCTTGGTGGGATTTCCATTATTATCTTCATTAGATT  
AGATTGTTAGGGTTGTCAAACAAAATTTTTGATTGATG  
TGTCATGAAAAAACGTAATATCGATTGGTTATTGGTGTGTAGGTACGGCCAAGC  
ATAAACGGTTAAACGTCAAACAGTGAATTCGTAGATGGA  
AGGTCAGAGAATTTGATGGCATCATCTTGGCAACCGTTACAAAAGCAATGTTCCCT  
ATTGGCTCAAGGTATGATATTGATAATGAGTTGCTATTCTAT  
CTATTTCTATTTCAAGAAAATTGTTATTCTTCCGTTAAAATTATTCATTTTCTTAACTTC  
AGCTCGACATTTTTCAGCGTGAGTTAACTTACGCTGAC  
ACTTTTAAATCGGTTGAACTTACGTAAAAAATGATTGAATCGATCTTAAAAAGTTTCA  
GCGTGGGTTAACTCGCACTAAAAAATACCGAACGAGAAGCA  
CAATTTCCCTATTTAATTTGGTTACAATTTGAAATAGAAAGATGTTTGGCGACGTGCA  
CTTAAAAAATGTTAAAATAGTACAATAATTAATGATGGA  
TTAATAATTTAGTTATTTATGTGTGCTAAATAAATTATATAATATATGCAGGAAGAGGATAT  
GTTCTCTAAGGAAGATGGATTTCTATGAAGCCATTT  
CAAGTGGGTGGAAAGGTAAAATGGACTCTATGCCGTAGGTTTTACAAAAGGGGAC  
TGCAAGGTGCCTCTTTGGATGCCAAGAGAATAGCTGATGACAT  
TGAAGTGTGTTAGAATCTGAAGCAAAGTATGGATCATAAATAATTATATAAAGAGCAAT  
TTTTAATTGCTCCCTCAATTTTCCACATAAAATTGATAA  
TTTTGGCCAGGTGATAGACACAAAAGAAAAGGGATTGATCATTGAAAACAAATGATCA  
TTATCATTGATATTTGATCTTGGCTGAGTAACAGACATTCAT  
TCATTCATTTATTTATTTATTTATTGAGGAATATATTGAATTGAGGTAGGTTTGGTATATAA  
ATGAATGGAAAATGAGATATTTTTGGAGGTGCTAAAGC  
TAACTTTGCTATTAACCTGGATCAATCATCTCCAATATGAAATGTAATGCAATATTCAC

GGTTGGTGTGGGGTTGATCAGAAGACAACATTGAATTGAA  
GTTGAAGCAAAGAAGTAGTAGTATGTTGGTGGTTTATTCCAACCTAGTGGGGGCCTTG  
GTAATTTAGATTCCATGCCGTTAGGGGATCCCTATGCATTC  
AAGAGATCAGTAGTGTGTTTATTAAATAGAGCGTTCAAATATGAACATTTTAATTTT  
AATTTTATAATTTAAATTTGAACCGTCCAATTATAATTG  
TCTCTTGAATGAGATTCAGTGC GGAGAATGAGTAATTGCATGGGAATCTGATCCGACC  
TAACTTGTCCCTCTCTATGTACGTCTTGTACAATGCTAGGTG  
AATGAGAAAATGTGATTGCGGTTTATAATTAACCTCTTTTTTTTCAGAATAGAACATAA  
>AtYUC2(At4g13260)  
CAAAATCCGAAATCTTTGTTTCAAATCTCAATTCTTGAGAGATTTTCTTATAACAAATAC  
TACAAAAATCTTTTGGAGTTTGAAAAATAATATTTTCATCA  
TTAGATTTACCCTGGTTTATAGGGAATATCCGATCTTTCTTCTTATCTATTTGGTTTATTT  
TCTTCTTAGTTCTTTTTGTAGATAAGATCAATGAAACTC  
ATTCTCTTTTTCACCTCTATTCTCGGGACATAATTATCCACGAGTCACAAAAGAGAGT  
ATAATCTTTGTTTACCACACGGGTTTAAAAACCTAATCTGA  
TATCAGTCCCCTACTTCACTTCTTGCATATTTTAGATCTATTTCTCTTTTTTTCTTCTC  
TTTCTCTTTTCATGGAGTTTGTACAGAAACGTTAGGC  
AAGAGAATCCATGATCCGTACGTGGAGGAACTAGGTGCTTAATGATTCCCGGACCA  
ATCATTGTTCGGTCCGGGCCGTCGGGACTGGCCACAGCGGCAT  
GTTTAAAGTCGAGAGACATCCCTAGTTTGGATTCTAGAACGTTCCACTTGCATAGCGTC  
ACTATGGCAGCACAAAACATATGATCGTCTTCGACTTCATCT  
CCCTAAAGATTTCTGTGAGCTTCCATTGATGCCTTTTCTTCAAGCTACCCTACTTACC  
CTACAAAGCAACAGTTCGTCCAATACCTTGAGTCTTACGCC  
GAACATTTTACCTAAAGCCCGTTTTTAAACCAGACCGTGGAGGAAGCCAAGTTCGAT  
AGGCGGTGTGGGTTATGGAGGGTGAGGACAACCGGAGGGAAGA  
AGGATGAGACAATGGAGTATGTATCACGGTGGCTTGTGTGGCGACCGGGGAGAAT  
GCCGAGGAGGTGATGCCGGAGATTGATGGAATCCCGGATTTTGG  
TGGACCTATCTCCACACAAGCTCCTATAAGAGCGGTGAAATATTTAGTGAGAAGAAG  
ATTTTGGTTGTAGGATGTGGAACTCCGGGATGGAAGTTTGT  
TTAGACCTTTGCAACTTCAATGCTCTTCTTCTTGTGGTTCGTGACTCGGTGAGGA  
TGAACAAAACCTTCTCGTTAATATATGCAAGAACAATGATA  
GATGTTTAATTAGTATAGTTCTTGCATTTTCTCGCTCTACGTAATTTGTCACTCTTAAAG  
GTTTAACTAACATCATTGGTCTCTTTGTGATCAAGTAA  
CCAAATGTTTACTCTTTTCTTCTTTCGCTTTCAAAAAATCCACGCATGTGATTATATTG  
ATTCAGATCTCTTGTAAATTTATGGATTATATATTCCAAT  
TCCATGATTACAGTTTTGGCTAATTAAGTTTTTGTCTAATGCTATAGGTACACGTATTA  
CCTCAAGAAATGCTAGGTATATCGACTTTCCGGGATATCCA  
CGAGCCTGCTCAAGTGGTTTCCAGTGCACGTGGTGGACCGGTTCTTGTACGTATGT  
CTCGGTTGGTTCTTGGTGACACGGATCGGTTAGGGTTAGTTCCG  
ACCAAACTTGGCCCTCTTGAACGCAAGATCAAATGCGGAAAGACTCCTGTTTTGGA  
CGTTGGCACTCTTGCCAAAATCCGAAGTGGACACATCAAGGTT  
CATTAAATATAATTAAGTATTTTTAATACAATCTTGATTACAAAACCGTGAGCTTATGGTA  
TATTGATTTGTTTTTTTTGTTTTTCTTGACTTTTAGG  
TGTATCCGGAGTTGAAACGGGTAATGCATTATTCGGCAGAGTTTGTGATGGGAGAG

TAGATAACTTCGACGCCATTATACTCGCCACGGGTTACAAAAG  
CAACGTACCCATGTGGCTAAAGGTGTGTACCATGAGCGATGATGCGTCTACATCTTCA  
TTATTCTTAATTCCTTGATATTGACACATCACAACCCATTTT  
ACGTTTCAATAGTTGAATTAACTTGGTTTGACTTTGAACTGTTTTTTTTTAGGGAGTGA  
ACATGTTTTCTGAGAAAGATGGATTTCCGCATAAACCATTT  
CCTAACGGTTGGAAGGCGAAAGCGGATTGTATGCAGTCGGTTTCACAAAGCTTGGA  
TTGCTTGGTGCAGCCATTGATGCCAAGAAGATCGCTGAGGATA  
TTGAGGTTCAACGACATTTCTTACCATTGGCTCGTCCTCAACATTGTTAATTAACCTGA  
GATTCGGGTTTTCGATTTGGCAAGTTTGGATTGGGTTATCTA  
AGAAGTAGAAAGGTAGTAGTGGATGCATTTATGTAAGGTTCCCTAACTCTTTAATTGTGA  
CATATGAGAGTTAGAAAGCAGGGTTAGATCAATGTTAGGTC  
AAAGATTTTTGTATTTTTGGGAAGGAAATATTAGATCATGGTCCACATTTGTATATATTTA  
TTTGGTTTTGT

>Glyma.08G038600

AAATCCCTTAACTTGCTGTCTATTAGTTTCTGTTTATGCCCTGAGACTTTGTTGCTTC  
CTGCTTTCATCCATTCAACAAAACCAAACTTCTTGTCAG  
CCTTGGCTTATTGAAGCAAATCATACCCTTACATACCATTTTGATTTGATCTTCAGATCA  
ATCAGACCATACTGTATCTCATCTGTTTCAACTTCACTCA  
AAGTACTATCATGGTTTTATTTACGCAAAGTTTTAAAAAGCATTCCGCCACCGAAATT  
TTGGCCACAATATCAAGGTTTCTGGGGGTCTGTGTGACCAC  
AACTTGACCATAATTGTGGTTGCATTTATCACTATATCAAGGATGGTCATGAAACCAC  
TACTGTGATTGCAATTTAAAATCTTGATTTAATGGTTTCAC  
TTTGTGATGACCTTGTGCACCTCTTGAAGCTTTTTATTTCAGGCTTGAAATTCTTGAAT  
TATAACTCCTTCCCCCTTTGATGCTTAACATGGAGTACTTG  
AAGGAAGTGGAAGGAAAAAGTGTCCATGATTATGTTGAGGTAAAGATGGGTAAAATG  
ACAAAGCCAATAAGTGTGGCAGGACCAGTGATAGTGGGTGCTG  
GTCCATCAGGGCTTGCTGCAGCAGCATGTCTTAAACAGAAAGGCATTCCAAGCTTAA  
TCCTTGAAAGAGCTGATTGCTTAGCTTCAATGTGGCAGCTCAA  
GACTTATGACCGCCTGTGCCTTCATCTCCCTAAGCAATTCTGCCAACTCCCTCTAATG  
CCATTCCCACAAAACCTTCCCTCTTATCCAACCAAAACAACAA  
TTCTTGGCCTATCTCAAAGCCTATGCTGACCATTTTGATATAAAACCAGCTTTAAGCAA  
GACAGTGATCAGTGCCAATTTTGATCATGGATGTGGGTACT  
GGAGGGTGAAGACTCAAGGTTTGA AAAAGGAGGAGACAGAATATGTTTGTCAGTGG  
CTGATAGTAGCCACTGGAGAGAATGCTGAAGAGGTTGTGCCTCA  
AATTGAAGGAATGAGTGAGTTTGAAGGGCCTATCTTACACACCAGCTCATATAAAAGT  
GGTAGTATGTTTGGTGGGAAGAATGTTTTGGTTGTTGGATGT  
GGGAATTCAGGTATGGAAGTTTGCTTAGATTTATGCAACCATGATGCTCGCCCATCCC  
TTGTGGTTAGAGATACGGTGAGTACACTTTAACTAATGATC  
TTCTAATTATATTGTTACTCTATAAACTAATCATAACCATTTACAATTGGATAAAAATATGA  
ACACTTTTACACCAGCTATATATATTGAACTATTTACT  
CATTAAATTGTTGTTTCTATAAATATACATTAGAAAGCATGTGGGTGTTGCTCTTACTTTC  
AGTTGACTGATCCTCTTAAATCCAGTTTAAATGTGTTCCG  
GTCCAAATCGTTGCAAGACCCTCGTTCAGCTGGAAGAGTGACGGGTACAGAGTCT  
GCTAATATATGGAGTGAATCATGATATGAACTAGGTTTCAGAAA

GATTGTACAGTATTAATTTTTAAGGTGTGTCTGTAGAGAAAAGAGTGAAAAAAAAATAA  
ACAGTAAAATAATATAAAATTCATATTTTTATACTTTAATT  
TAATTTAAATTTACAGCCTAAAGTTTTTAAATGTGTATTTTGTGAAGTTTGATTTCAAAT  
ATGTCTTCTGTTATTCAACTTAGTCTCATGAATTATTGT  
GAGGGCCGAATACAAACCCCAAACGTCATTTTCATTATTAAGAATTAGTATGACAGAA  
ATTGCATCTTGCGAAAATAATTTAATTATTTTTAAAATTT  
AACTCGACTATTAACCTAAATAAAGACACTCTTTAAAAATGTTTTTTCTTAAACTAAA  
AATCTCTCAAAAATGTTTTTGTGCATGGTCCTCAATAGTTC  
GCATGCGCAAACAACGTCAGCAATCCAACTTTTTATATTGATAGTATGTTCTTTTCTC  
TCATCGAATCAAACCATTTTCTATGTAAATCTCCGGAAGCA  
TGAAAAGATGAGGGTACTAATTTTCTAGAAAGTTTATTAAGCAACTTTTATGATCTTTA  
ATATTAACGTGATATTTTCTTTTATGTAGGTGCATATC  
TTGCCTCAGCAGATGTTGGGAAATCAACGTTTGGTTTATCTATGAGCTTGCTCAAGT  
GGTTCCCATGCGTCTCGTGGACAAATTTTACTTCTGATGT  
CACATCTCATTCTCGGGACACAGCTCAATTTGGACTTAATCGTCCCAAATTGGCCC  
TCTAGAGCTCAAGAACTTGTGCGGCAAGACCCAGTTTTGGA  
TGTAGGCACACTTGCTCACATAAAAAGTGGAAAATTAAGGTTAGATTATTCTTCCTAT  
CCCAATCAAATCCAACTATTTTTCATCGTATTCTGGTTCT  
TGTATAATCAAACAAATTTGCCTTTTGTCTAAAGGTGGAGATTTAAAAGAAGCAAAAA  
AACTTTTTTCTTTATTGCTTCCAACATTATATTGTCTAAT  
ATGTATAGGTTTGCCGCGGAATTAACAACACTAGCAAAGCATAAGGTGGAATTTGTAGA  
TGAAAAACAGAGAATTTGATGTCATCATTATGGCAACTGG  
TTACAAAAGCAATGTACCCACTTGGTTGAAGGTGCTTCCTTGCTAATTTAGTTTGGGC  
CTTTTGGCTAATTGGCTTAGTATGGGCACTTATATACTTA  
ATGTAATCATTGACGTTAATGAAATACAATTAACATATAATGATGGGCTTTTGAATATTT  
TTGGTCACCAGGGCAGCAACATGTTTTGTGAGAAGGATG  
GATTGCCAGGAAAGATTTCCCAAATGGATGGAAAGGTGAAAATGGACTCTATGCCG  
TGGGTTTCTCTAAACGTGGCCTTCTTGGTGCATCTATTCATC  
AAAGAGGACGGCAGAAGATATTGAACACTGTTGGAAAGCTGCTAATACCACGCGTGT  
GTAGGACTTGATGCGTTTTAGGATATACAACGGAATCTTTTGT  
GCTTGAATTAAGCAACGGAATCTTTTGTGCTTGAATTAAGCAGTAATTATTTAGATCA  
CGTTTCATTCAAACATTACACTTTTTTTTTTTCAGAGAATA  
TAAATATACTACAACATCAT

>Glyma.05G231100

ATAAGGCCGAAATTTTGCCCACTCCCAATATGTGTTGTGTATTTGGTTTTTGGGTGAT  
GAAAGTTTGTGTTGTTAATGTTAGTTATCATTAAAGGTGG  
AGTTGTCCCACTTATAAACCAAACCTCTTTAACACTCATCAGCAGCCACCAATTCAAAT  
ATATATACATACATGTATACATCGAATCCCAATACAAAATC  
CCTTTAACTAGCTGTCTATTAGTTTCTGTTTATGCCCTGCTACTCTGTTTTCTCATCCAT  
TCAACAAAACCAAAGTTCATACTCTTTTCAGCCTTGAAGC  
AAATCATACCCTTACAAACCATGTTGATTTGATCTTCAGATCAATCAAACCACAGTGTA  
TCTCATCTGTTTCAACTTCACTCAAAGTACTATCATGTTTT  
TATTTTATGCAAAGTTTTAAAAGCAGTCCGCCACTGCAATTTTGGCCTCAACATCAAG  
GTGTTTGAAGTCTGTCTGACCACAACGTGACTGCAATTGTG

GTTGCATTTATCCACAAAATTTTCCCTTTATCAAGAATAGTCATGAAACCATGATTGTGA  
CCGCAATTTAAAATCATGATTTAATGGTTTCACTTTGTCA  
TGACCTCGTGCACCCCTTGAAGCTTATTCAGGCTTCAAATTCTTGAAATTATACCCCC  
CTCCCCACCTCTCCCTTTGATGCTTTACATGGAGTACTTGAA  
GGAAGTGGAAGGAAAACTGTGCATGATTATCTTGAGGTAAAGATGGGTAAAATGAC  
AAAGCCAATAGGTGTGGAAGGACCAGTGATAGTGGGTGCTGGT  
CCATCAGGGCTTGCTGCAGCAGCATGTCTTAAACAGAAAGGCATTCCAAGCCTAATC  
CTTGAAAGGGATGATTGCTTGGCTTCAATGTGGCAGCTCAAGA  
CTTATGACCGACTATGCCTTCATCTACCTAAGCAATTCTGCCAACTCCCTCTAATGCCT  
TTCCCCAAAATTTCCCTCTTATCCAACCAAACAACAATT  
CTTGGCCTATCTCAAAGCCTATGCTGACCATTTTGACATAAAACCAGCTTTAAGCAAG  
ACTGTGATCAGTGCCAACTTTGATCATAGATGTGGGTACTGG  
AGGGTGAAGACTCAAGGTGTGAAAAGGAGGAGACAGAATATGTTTGTCAAGTGGCT  
GATAGTAGCCACTGGAGAGAATGCTGAAGAGGTTGTGCCTCAA  
TTGAAGGAATGAGTGAGTTTGAAGGGCCTATCTTACACACTAGCTCATATAAGAGTGG  
TAGTATGTTTTGTGGGAAGAATGTTTTGGTGGTTGGATGTGG  
TAATTCAGGCATGGAAGTTTGTTTAGATCTCTGCAACCATCATGCTCGCCCATCCCTT  
GTGGTTAGAGATACAGTGAGTACACTTAAAACCTTATGATCTT  
CTAAATGACATACTCAACATCTTCATCATATATATTCTTCCTTCACTGAACCTATTTAATA  
ACATAATAATTAGAGTTTATTTATATATCTTGTTACTTT  
CAACCAATCAGAGTAAATAAGACTTTTTAAGATAATTACCATTAAAGTAAATAAACTAATC  
ATAACCATTTATAATTGGATAAAAATATAAAAAGCTTTTAC  
ACCAGCAATATATTGACTATTTACTCATTAAATTATTGTGTTTATATATATACATTGGAAAGC  
ATATTGGGTGTTGCTCTTACTTTTCAGTTGACTGGTCCT  
CTTAAATCCAGTTTAAATAAGTGTTCCGGTCGAAATCGATGTAAGACTCTTGTTTCAGCT  
GGAAAAAGTGACGTGAACAGAGTCAGCTAATGTATTACGTA  
CATTATGGAGTAAATCATAATATGAAACTATGTTCTGAAAGACGTTTGTGCGTATTAATTT  
TTTAAACGATGATGATCAGTGACCACGCCTAAAGTTTTTAA  
ATGTGTATGTTGTTGGTGAAGTCAGATTTCAAATATGTATTCTATTATTCAAATTAGTCT  
CATAAGTTATTGTGAGGGCCAAATACAACTCCAAACGTC  
ATTTTCATTATTAAGAATTAGTATGACAGAAATTGATTCTCCGCGAAAACAAATTTAAT  
TCTTTTTTAAAATTTAACTCAACTATTAACCTCTAAAGAAA  
CAAACTCTTTGAAAATGTTTTTCTTAAAGAAAAATCTCAAAAATGTTTTGTCATGGT  
CCTCAATAGTTAGCATGCGCAAACAACGTCAGACACCCAAG  
CCTTTGATATTGATAGTATGTTCTTTTCTCTCATCGAACCATTTTCTATGGTCACGGGA  
ATCACCGAAAGCATGAAAAGATGATGGTCACTAATTTTTCT  
AGAAGTTTACAAAGCAACTTTTAAAGATCTTTAATTTTAAACGTGATATTTTCTTTTTACT  
GTAGGTGCATATCTTGCCACAGCAGATGTTTGGGAAATCA  
ACTTTTGGTTTATCTCTGAGCTTGCTCAACTGGTCCCCATGCGTCTTGTGGACAAAT  
TTTTACTTCTTATGTCACATCTCATTCTCGGGGACACAGCTC  
AATTTGGACTTAATCGTCCCAAATTTGGCCCTCTAGAGCTCAAGAACTTGTGTGGCAA  
GACCCAGTTTTAGATTTTGGCACACTTGCTCACATAAAAAG  
TGGAAAAATTAAGTTAGACTATTCTTCCTATCCCAATCAAATCCAAAATAATTTTCATC  
GTGTTCTGGTTCTTGTCAAAGTCAAACAATTTGCCTTTT

GGTTAAGGTAAAGATTTAAAAGAAACAAAAGAAAAAAGACTTTTTTTTTCTTTCTCTT  
TTATTGTTTTCAACATTATATAGTCTAATATGTAATAGGTT  
TGCCGCGGAATTAACAACACTAGCACAAACAAGGCTGAGTTTGTAGATGGAAAATA  
GAGGATTTTCGATGTGATCATTCTAGCAACTGGATACAAAAGTA  
ACGTACCCACATGGTTGAAGGTGCAGAAAACAACAGTCTTATGCTTAATGTCATCGAT  
GATGTTAATGAAATACAATTAACATATAATGATTGGGCTTT  
TGAAATTTTTTTGGTCACCAGGGCAGTGACATGTTTTGTGAGAAGGATGGATTGCC  
AGGAAACCTTTCCCAAATGGATGGAGAGGTGAAAATGGACTCT  
ATGCTGTGGGTTTCACTAAACGTGGCCTTCTTGGTGCATCTTTTGATGCAAAGAGGAT  
TGCAGGAGATATTGAACATTGTTGGAAAGCTGCTAATTAATA  
CCATGCGTGTGTAGGAGTTGATGCACTTTATTATATGCAACGGAATCTTTTGTGTATGG  
ATGTACGATCGAAAAATCCCAAACCTAGATTTAATCATTTT  
AAGTGATAATTATAATGACTTGCTTGAATTAAGCGGTAATTATATTTTGTCTTGTTCAT  
TTAAATATTACACTTTTTTTTTCTTAATTAATTAATA

>Glyma.07G086200

AAATCCCTTGTGAATAACAACCTTTATTCCTCTACTTTCTTTCTGTCCATAAGTAGAGTT  
GCTCCGTATGAGACTCTCTTGCTTCCCGCTTTCTCCTCCA  
ATGAAACAAAACCAAACCTTCAAACCTCAGTACCCTCAGTTTGCTGAAGCAAATTAGA  
CCTTCATAATATACCCTATTTCCAAAATCCAATATTCTTCAT  
AACATCAAACCATCCATCATCTTCTCATCTCATCAGCTCAATTCTTATAGGAGGGGAG  
AGTTGGTGATTAAGGAGTTGAGTTTCTTTTATGGTTTTTT  
TCACTTTGATATATAACTTCAGCACCCACTAAACCTTAGTAGCTAGGCTTCAAAGTC  
TTGAAATAATCTACCTTATACCCTCCAAACTCTCCACCATT  
TTTTTTTTCTGGTTGTTCTTCATGGACTACTTGAAGGAACTAGAAGGAAAAAGTGTCCA  
TGATTGTTATCACCAGCACCCAGATAAAGATGAGTAAAATGGC  
AAGCCCTATATTTGTTCCCTGGACCAGTTATAGTGGGAGCTGGTCCCTCAGGGCTAGC  
TGCAGCAGCTTGCCTTAAACAGAAAGGCATTCCAAGCCTAGTC  
CTTGAAAGAGCTCAATGCTTAGCTTCAATGTGGCAGTTCAAGACTTATGACCGCCTCA  
GGCTTCATCTCCCAAAGCAATTCTGCCAGCTCCCTCTCATGC  
CATTCCCAAACAACTTGCCTTCTTATCCACAAAACAGCAATTCTTGGCCTACCTTAA  
GGCCTATGCTGACCACTTTGACATAAAACCTGTCTTCAGCCA  
GACTGTGGTCAGTGCTGAATTTGATCATGTGTGTCATCATTGGAGGGTCAAGACTCA  
AGGAGTACTCAAGAAAGAGGACACAGCAGAATATGTTTGCCAA  
TGGCTTATAGTTGCTACTGGAGAGTGCGCTGAGGAAGTAGTGCCTCAAATTGAAGGG  
ATGGGAGAGTTTGAAGGGCAGATTGTACACACTTGCAAGTATA  
AGAGTGGAACAAGTTTTGTGGGAAGAATGTTTTGGTGGTTGGTTGTGGGAATTCAG  
GCATGGAGGTTTGTGGATCTCTGCAACCACAATGCTCGCCC  
TTCCCTAGTGGTTCGAGATACGGTGAGTTCACTTCTGAAAAATAATTGCTTTAATTTT  
TTTTGGTAAACTAAACATGCACTTAAACAACCTCATTATATG  
AAACATGCTAAAGATCTTCCACCATTCTTAACTAGATATTAATAGTAATTAATATAATTGA  
AATGTTTATACACATAAAAAGTATAGTGAGTTTTCTGTA  
CTGAAATAGAGAAATTTTATGCTGCACTCCAAAATTTAAGAGTTTTGGTACTGTTATTG  
AGAAATCTCTTTCTCTCTTCTTTCTCTTTCTTGTATGCAC  
TCAAACCTCATTTAACTATTGGTTTAGTACCAACACCCTTACATTTTATTAAGGGTATCAA

AGCCCAACTCTAAAGAAAAAAATCTTAGTTTGAGATGAA  
ATATAGAAAAATATATAGAAATAATAATGTAAATATGTTCTGTCTAAATCGTCATAGTGC  
TCTGATAGTCAATTCTGATAGACCAATTGATCTAAGGCC  
CATGTTTTTTTGGACAAAGCTGGAACTGGAGAGTGAACACAGCCTGCTAACATACTAT  
ACTATATTTTGAATAACTAGCACTCTCAAAGAGTTTGTGT  
CATTGTTCTCTCTCACTTCATTGTAACCTGTTTGCATGCGCAACAAGGTCAGCA  
TCCCAAACCTTAGAATAATATGTCCTTTGAGTTCGAGATCA  
ATCTTTTTTGTCTGCACACAACCACTGTGTGTCAGTATTCACAGACACAACACTGGAA  
GCATGAAAAGATTATTGTCATTAGTCTCCACCCTGGTGTCTA  
CAATTTCTAAAAGTTTCTTAAGCTATCACCTTTCCACCCCACTTTTTAATTTTTAATG  
TGATATTGAGATCTTTTCTTTTCTCTTCATTTTGCAGGT  
GCATATCTTGCCACAACAGATGCTAGGGAAATCAACTTTTGGTTTATCCATGTTCTTGC  
TCAAGTGGTTCCCTATACGTTTTGTGGATCAATTTTGTCT  
CTAATGTCACATCTCATGCTTGGAGACACAGATCAATTTGGACTTCGCCGTCCAAAAC  
TTGGTCTCTAGAGCTCAAGAACTTGTACGGAAAGACACCAG  
TTTTGGATGTTGGGACACTCACTCAGATCAAAAATGGAAAATTAAGGTAACACACAT  
AATAACATTACTCTTGTATGTGCCAATCAAATCCAAAAGAGC  
TCTCATCATAGCTATCTAGCTTGTCTTGTCTTAATCAACTAAAATTGCTTTTTCTC  
TAAGGCAAAGGTTTCAAAGAAAAAAAAAAGACATTTTTT  
GTTTCATTGTTTCCAACATTAGACCTTGTCCAATTATGTGTATAGGTTTGCCGGGGAAT  
TAAACGACTAGCACGCAATGCCGTGGAGTTTGTGATGGAA  
AAGTAGAGAACTTTGATGCCATCATTCTAGCAACTGGTTACAAAAGCAATGTACCCTC  
TTGGTTAAAGGTGCTTCTTTAATTCTTTGTTGCTAACTTAA  
TTTGGTATTGTTTTGGTATTTTGTCTAATAAAAGTAAATTTTCATTTAATTAATTGAGTAA  
ATAGTCCACAATAAAAATATTTTCACTATTAACATAATTA  
TAAATTTACTTTTACAGTAATTATTTAAAAATTTATATCACAATAATTTCTTATCAATTG  
ACCATCCAAAATTTTTATACTAACAATATATAAAAAT  
TAACTCCAATTAATTTACTTAGAATTTCTAAAATATCATTTATTTTTTAGAATTGTGTTTA  
ATAATTTTTTTTAGAGGAGAGATTCCAGCAAAAAGCTGG  
ACAACACTGGCTTGTTTACTCTCATCATTGATGGTATTAATAATGGAATATATGTTATAAT  
TGGCATATTGATTGGGCTAGAAATTTACTATGAGCAGGG  
CAGTGACATGTTTAGTGAGAAAGATGGGTTTCCCCGGAAGCCATTCCCAAATGGATG  
GAAAGGTGAAAATGGACTCTATGCCGTGGGTTTACCAAACGT  
GGCCTGCTTGGTGCATCTATTGATGCAAAGAGGATTGCTGAAGATATTGAACATAGCT  
GGAAAGCTGAGGCCACGCATGTTTTGGAGTTCCCTTGTCCAC  
TTGCGTGATGTGGGAAAGATATATGCAAATGTTTTAGGATTAGAAAAAAAAAAGGTATG  
GCCAAGCCTCTTGGTGGTGCCTTTTATTTGACACAATGCTT  
TGTACCAAACAATTTCTCTCCCATTTCCGGTGCAGCAGCCTCAAAGGGAAAAAAGGAG  
TTTGAGAAAGAAAAGGAAAAACAAAAAACAATAATGAGA  
GGGCATATATATGTGTGTATAGAATGTGTGATTCTATAAATCCATTTTACCAGACTGG  
GAGATTGGGTTGGCGACCAATTTGATATGATTTTTAGTT  
TGTTGGGTTGAAATTAACGAATATTGTCATGTTACACATTTGTATATTTGTACATTG  
CCTTATCTACCTAGTTAGCTAGTTGATTTTTTTGAGAAAA  
GGGGCTGTTGTTATAGTTTTTGGCCAATAGAAATTATGTAATGTATCCATCGATTTGT

CCTTGTTCTAATTATTTATGA

>Glyma.09G190700

CTTTATTCTCTACTTTCTTTCTGTCCATAAGTAGAGTTGCTCCATATGAGACTCTCTCT  
TGCTTCCCGCTTTCTCCTCCATTACAACAAAACCGAACTT  
CAAACATCCCTCACCCCTCAGTTTGTGAAGCAAATTAGACCTTACAATACCCTATTT  
CCAAAATCCAATATTCTTCATAACATCAATCTCATCCCGTC  
AGCTGATTAATTCTTTATAGGAGGGGAGAGTTGGTGATTAAGAGAGTTAGTTGAGTTT  
CTTTTATGGTTGTTTCACTTTGATATAACTTCAGCACCATCT  
AACCTTTGTAGCTAGCTAGGCTTCAAAGTCTTGAAATCATCTACCTTAAACTCCAAAC  
TTTCCACCTTTTTTATTTTTGTTTTGTTTCTGGGGTGGTG  
TTCATGGACTACTTGAAGGAACTAGAAGGAAAAAGTGTCCATGATTGTTATCACCATC  
ACCAGCAGCAGCAGATAAAGATGAGTAAAATGGCAAGCCCTA  
TATTTGTTCCGGGACCAGTTATAGTAGGAGCTGGTCCCTCAGGGCTAGCTGCAGCAG  
CTTGCTTAAACAGAAAGGCATCATTCCAAGCCTCATCCTTGA  
AAGAGCTCAATGCTTAGCTTCAATGTGGCAGTTCAAGACTTATGATCGCCTCAGGCTT  
CATCTCCCAAAGCAATTCTGCCAGCTCCCTCTCATGCCATTC  
CCAAAAACTTGCCTTCTTATCCACAAAACAGCAATTCTTGGCCTACCTTAAGGCCT  
ATGCTGACCACTTTGACATAAACCTGTCTTCAGCCAGACTG  
TGGTCAGTGCTGAATTTGATCATGTGTGTCAGCTTTGGAGGGTCAAGACTCGAGGAG  
TAATCAAGAAAGAGGGACACAGCAGAATATGTTTGCCAATGGCT  
TATAGTTGCTACTGGAGAGTGTGCTGAGGAAGTAGTGCCTCAAATTGAAGGGATGGG  
AGAGTTTGAAGGGCAGATTGTACACACTAGCAAGTATAAGAGT  
GGAAGCATGTTTTGTGGGAAGAATGTTTTGGTGGTTGGTTGTGGGAATTCAGGCATG  
GAGGTTTGTGGATCTCTGCAACCATAATGCTCGTCTTCCC  
TAGTGGTTAGAGACACGGTTAGTAATACGCTTCTGAAAAATAATTGCTTTTGTGGT  
AACTAAATAACATGCACTTAATTAACCTCATGATATGAGA  
CATGCCAAAGATCTTCCACCATTCTTAATTAGATATTAATAGTAATATAGTAATCAAATG  
CTTATACACATAGTAAAAGTATAGAGTTTTGTGTACTGA  
AATAGAGAAATTCTATGCTACACTCCAAAAGAGTTTTGGTACTATTATTGAGAAATTCTC  
TTTCTCTTTTTTTTTCTTTCTTGATGTAATCAAACCTC  
ATTTTCTAAGGGTATTAAGAGCAACTCTAAAGAAGAAGAAAAAATCTTAGTTTGAGA  
TGGAATATAGGAAAATATATAGAAATTAATAATAATGTAAA  
GATGTAAGTGTCCAAAATCTTCTAAGGCCATGTTTTTTGACAAAGCTGGAATCTGG  
AGAGTGAAGAACACAGTCTTCTAACATAATATTATACTATAT  
TTTGCTATAACTAGCACTCTCAAAGAGTTTGTGTCATTGTCCTCTCTCACTTCATTAA  
TTCAATGTAAGTCTGTTTGCATGCGCAACAAGGTCAGCATCC  
CAAACCTTAGAATAATATGGCCTTCATGAGTTCGAGATCAACCTTTTTTTCTCTGCAC  
ACAACCACTGTGTGTCAGTATTCACAGACACAACACTGGAA  
GAAGCATGAAAAGATTATTGTCATTAGTCTCCACCCTCGTGTCTACAATTTCTAAAAA  
GTTTCTCAAGCTATCACTTTTTCTCCCACTTTTTAATTTT  
TAATGTGATGATGATCGAGATCTTTTTTTTTCTCTTCATTTTTTGCAGGTGCATATCTT  
GCCTCAACAGATGCTAGGGAAATCAACTTTTTGGTTTATCC  
ATGTTCTTGCTCAAGTGGTTCCCATACGTTTTGTGGATCAATTTTTGCTTCTAATGTC  
ACATCTCATGCTTGGAGACACAGCTCAATTTGGACTTCGTC



GTCCAAAACCTTGGTCCTCTAGAGCTCAAGAACTTGTACGGAAAGACACCAGTTTTGG  
ATGTTGGGACACTCACTCAGATCAAAAATGGAAAAATTAAGGTGCATATGTATGTATAATAACATT  
AACATTACTCTTGTGCATATGTATGGAAAAATTAAGGTGCATATGTATGTATAATAACATT  
ACTCTTGTGCCAATCAAATCCAAAAGAACTCTCATCATA  
GCTATCTTGTCTTCTTGTCTTAATCAACCAAATTTTTGCTTTTTCTCTAAGACAAAGGT  
TTAAAAGAAGAAGAAAAAGACATTTTTGTTTCATTATTT  
CCAACATTAGACCTTGTTCATTATGTGTATAGGTTTGCCGGGAATTAACGACTAG  
CACGCAATGCAGTGGAGTTTGTGATGGAAAAGTAGAGAACT  
TTGATGCTATGGTTCTAGCAACTGGTTACAAAAGCAATGTACCCTCTTGGTTAAAGGT  
GTTTCCTTTAATTCTTTCTACTACATTTGGTATAGTTTTGG  
AGTTTGGTCTAATAACAGTAGAATTTCTTTAATTAATGGAGTAAATAGTTTATAATAGAA  
ATATTTTTACACTGCTCCTATTATTTAATTATAAATTTA  
TACTTTTTATAATTATTATTTAAAATTTTATATCAATAGTAATTTCTAATCAGTCTACAATGC  
AAATATTTAATACTAACATTATATACATATTAATTT  
CTAATTAACCTAGAACTTCTAAAATATCATTGTTTTAAATTTGTGTTTGTTTTTTTAGA  
AGAGAGATTCCAGCAAAGCTGGACAACCTCACTCTCATC  
ATTGGTAGTATTAATGGAATATATTAATGAAAAAAATTTGACAAACACCGTAAACATA  
AAAACAACCACTCAACACTCAATGATATGACATAAAGTA  
TATTATTCTATTTTTAATATATTTAATAAATAAATAAAAAATTATGCCTTGAGGGTGTATGAT  
TTTGTGCAGTAGTGAGTATATGACTGCTTTATTATAA  
TTGACATATTGATTGGGCTTGAATTTACTGTGAGCAGGGTAGTGACATGTTTAGTGA  
AAAAGATGGATTTCCCGGAAGCCATTCCCAAATGGATGGAA  
AGGTGAAAATGGACTCTATGCGGTGGGTTTCACCAAACGTGGCCTTCTTGGTGCATC  
TATTGATGCAAAGAGGATTGCTGAAGATATTGAACATAGCTGG  
AAAGCTGAGGCCAAGCATGTTTTGGAGTTCCCTCGTCCACTTGCCTGATGTGGGAA  
AGATCGATGCAAATGTTTTAGGATTAATTAGAAAAAACAAAA  
AAAAAGTATGGCCAAGCCTCTTGGTGGTGCCTTTTATTTGACACAATGCTTTGTACC  
AACTATATTTCTCTCCCATTTTAGTACAGCAGCCTCAAAA  
GGGGAAAAAGGAGTTTTAGAAAAGAAAAGGAAAATTAAGAAAAAGAACTAAAATGAGA  
GGCCATATATGTGTGCATAGAATGTGTGATTCCATAAATCCA  
TTTTACCAAACCTAGGAGATTGGGTTGGCGACTAATTTGATGCGTATTTTTAGTTTGGT  
TGGGTTGAAATTAATTAGCTGAATATTGTCATATTAATTAC  
ACATTATTTGTATATCTTTTTGTACATTGCCTTATCTACCTAGTTAGCTAGTTGATTTTATT  
TTTTATTTTTTTTTAGAAAAGGGGTTGTTGTTATAGTT  
TTTTAGCCTATAGAAATTATGTAATGTATCC

>AtYUC3(At1g04610)

ACACACATACACTTACATCTCCATCCTCTTGTCTTAAAAAGTTTCCAAAATCTTTCTTTT  
TTCTTCTTCTACATTCTTAAAATTTCTTCTGTTTTCTCCT  
CACAACCAGACAAGCAAACCTCTAAACTCTGTGGAAGATGTATGGAAATAATAACAAGA  
AGTCTATCAACATCACGAGTATGTTTCAAACCTCATCCCCG  
AAGGCAGCGACATTTTCTCCCGCGTTGCATCTGGGTCAATGGACCCGTCATCGTC  
GGAGCTGGCCCATCAGGTCTAGCCGTTGCTGCGGGCTTGAACG  
TGAAGGGGTACCATTATAATCCTCGAGCGAGCTAACTGCATTGCTTCATTATGGCAA  
AACAGAACCTACGATCGTCTCAAACCTCATCTACCTAAACAG

TTTTGCCAATTACCCAATTATCCTTTCCCGGACGAGTTCCTGAGTACCCTACCAAGT  
TTCAGTTTATTTCAGTACCTTGAGTCCTACGCAGCCAACCTTG  
ACATCAACCCTAAGTTCAACGAGACAGTCCAGTCCGCTAAATATGATGAGACGTTCCG  
GGCTGTGGCGGGTTAAGACCATTTCAAACATGGGTGAGCTCGG  
TTCTTGCGAGTTTGAGTATATATGCAGATGGATTGTGGTGGCAACGGGAGAGAACGC  
TGAGAAAAGTTGTGCCGGATTTTGAAGGTCTAGAGGATTTTGGC  
GGCGATGTTCTCCATGCTGGTACTATAAATCCGGTGGAAAGGTACCAAGGGAAAAAG  
GTTTTGGTGGTGGGATGTGGAAACTCCGGTATGGAAGTCTCTC  
TCGATCTCTACAATCACGGAGCAAACCCATCGATGGTCGTTCTAGCGCTGTAAGTA  
CCAAAAGTCTTAAACCAAAAAAAAAAAAAAAAAAGTACCAAAAAGTT  
CAAATCTTTATAGCCCCTAAACAGAGCATCCTCTGTTTCTGTTACTCTGTTTTCTAAA  
ACAGAGCAGTATCTAATAGTCTGTGTTTTTTTTTCTTTCT  
TGATTTTATCAGGTTTCATGTTTTACCAAGAGAGATTTTGGGAAATCAACGTTTGAATT  
AGGAGTTACGATGATGAAGTATATGCCCCGTTTGGCTCGCGG  
ACAAGACTATACTCTTTCTGGCGAGGATTATCTTGGGGAATACCGATAAATACGGTCTA  
AAAAGGCCGAAAATTGGACCGTTAGAGCTAAAGAACAAGGA  
AGGCCAAAACCTCCGTTCTTGACATCGGAGCGTTACCCAAAATCAGATCGGGAAAAGAT  
CAAATCGTCCCCGGAATCATAAAGTTCGGCAAAGGCAAAGTT  
GAGCTAATAGATGGCCGTGTTCTTGAGATTGATTCCGTTATTCTAGCTACTGGATACA  
GAAGCAACGTCCCTTCATGGCTTAAGGTAATAAATAAAACAT  
CTTTCATTCATTGTTTCTTCTCAAGGTTTAGCTTAAATTTTAGACATTTAATGATGTCGG  
AAGACAAAACACACAAAAAAACCACCCGACCCGGTCCTA  
GTTTAGTGAAAACCCCTACTCAAATTGTGTTTTCGAATGTGAGCAATAAATGCAAATGAAC  
CATTAACTTTATATTTTTCATCGAAAAGGATACAAAAACGT  
GGTACTAGTTTTTGGTTAGAAATAGAAATCCGGTAATGACAGTTAGGACTAAGAATTAG  
GTCAATAAATTCGATGTGTACTAATTTGGTGTGTTGAATT  
TTAATTGTATTAACAGGACAACGACTTCTTCTCCGATGATGGGATACCAAAAAACCCG  
TTTCCAAACGGATGGAAAGGAGAGGCGGGATTGTATGCGGTA  
GGGTTACAGAGAAAAGGATTGTTTGGTGCCTCGCTTGTATGCTATGAGTGTGGCTCAT  
GATATTGCTAATAGGTGGAAAGAAGAGTCTAAGCAACAGAAGA  
AAACTGCTGCTGCTCGTCATCGTTCGTTGATTTTACATTTCTAATCATCATTATCAAATT  
TAGGGAAAAAATATTCAAAAAAAGAAGAAGATAATTAAG  
CCCTCTCCTCGGAAGAAAATACCCCAAAAAAAGAGAATTGTGAAAAGAAAAAATA  
ATAGGGGGATTTTTCTTTGTTTTTTTAGGAAGATGTGGCTTT  
TTTATGATTTTTATTTAAGAGTGCTTTATTTTGTGTTGTATTTTTTTAAATCTTCATT  
TTAGATTTTGAACCTTGTAAGAAGTTTTGCTTAATCT  
AATATGACAAATATATTTTACGGTTTTGTAA

>Glyma.10G128700

TCAACTAAATCTCTCTAATCTCTCTCCATCATTCAACAAAAGTCAATATAATTCCTCACC  
CTCTTTCACCTTCTCAAACCACTTAACATAACACCAAACCT  
TTGTCATCACCAGAAACCAAGAAAAGAGGAAAAAATGCATGACATATGTCTGAACATG  
CCACCAATGGTTCAAACCTTCGACCCAGAGGACCTGTTCAA  
AGGCGTTGCATATGGGTGAACGGACCCGTTATAGTAGGTGCTGGCCCTTCAGGTCTT  
GCAGTGGCAGCATGCCTCAAAGAGCAAGGTGTTCCATTCTTAA

TCCTCGAGAGAGCAAACACTGCATTGCCTCTCTTTGGCAAACCGCACCTACGATCGCT  
TAAAGCTTCATCTCCCAAACAGTTTTGTCAATTACCAAACCTT  
CCCTTTCCCTGAGGACTTCCCTGAATACCCCACAAAGTTTCAGTTCATAAGCTACCTT  
GAAAGCTATGCAAAGCACTTCAACATTTCCCCACAGTTCAAT  
GAAACAGTGCAGTCTGCAAAGTATGATGAGACCTTTGGCCTCTGGAGGGTCAAAC  
CATCAGGAAGATCAAGAAGTTAGGAGAAGCCTCTTCAGGTTGTT  
GTGGTGCTGTTGAGTGTGAAGTTGAGTACATTTGCAGGTGGCTTGTTCGTCGCCACC  
GGCGAAAACCTCGGAGAAAGTGGTGCCTGAGTTTGAAGGGTTGGG  
AGAGTTTGGTGGCCATGTTATGCATGCTTGTGACTATAAATCTGGGGAGGGATATGGT  
GGGCAAAAAGTGCTTGTGTTGGGTGTGGAAATTCAGGCATG  
GAGGTCTCACTGGATCTTTGTAACCACAATGCTAACCCTCAATGGTGGTTAGAAGCT  
CAGTGAGTATTAGCTAAAAAATCTTACTTAATTAGCATTCTT  
GTATAAACAAAACCTTGGATACAGTTCATAGCTGTTTCTGGTGGTACTGTTCTTCAGTC  
AGAATTAGAGTTTCGTTTTAATAATTTATGTTGACATTTAA  
TGAAAACCTTTTATTGTCGGGATTACTGATGTGAAATTTAATTCTGATTAGCAAGCAAC  
ACCAAAAACATGCATATAAGCTTTGTCCTTTTTTATATGTAA  
TATATTTTTCTTTCTTCTTATCTAATATTTGTGTTTTTTTTTATGATCAGGTTTCATGTGT  
TGCCAAGAGAAGCTTTTGGGAAATCTACCTTTGAGCTT  
GCTGTGATGTTAATGAAACGGTTTCCCTCTATGGATGGTTGATAAGATATTGCTGGTTCT  
GGCACGTTTGATTTTGGGGAATGTTGAAAAGTATGGTCTAA  
AAAGGCCTTCAGTGGGTCTTTGGAGCTCAAGCACACTGCAGGGAAGACCCCTGTG  
TTGGACATTGGGGCCCTTGAGAAAATTAGATCTGGCAAAATCAA  
AGTGGTTCCTGGAATCAGAAGGTTCTCCAGGGAAAGTTGAACTTGTTGATGGCCA  
AGTTCCTCAGATTGATTCTGTGGTCTTGCAACTGGGTATCAC  
AGCAATGTACCATCATGGTTGAAGTTTCGTCTTTCTTTATAGTTTATATTCAGTTATTGA  
CACTTTTTTTCTTGATTGTTTCTTTTGCATTGGATTCTT  
GCTGCCAGTTATGGAAGTGGATTGGGTTTAAACCCTGTAGTTGTTCTCTCTCTCAAT  
AAAACCAAACCATGTCAGTTTGTTAGTTTTGGCTGGTGGTT  
TTTTCTTCATTTTAAATATTCTTAATATAAGTATTCAACAGGTGTTTCTTTCTTCTACTAT  
CCACTTGTGCTTTGTTTTTCTCCAAGTTTTTTTTTGT  
ACTCTTACATGCCCTCTTTAATGACCAAGGAAGGTGTGTGTGTCTGTGTGTTGATGGA  
AAAAAATCAATGTATTTTGA AAAATGCTTCAAATTTATAGGC  
ATCTATAATAGGTACGTACTACTTGGTTGCTTAGTACATTTTATAGATATTATAATGTTTCT  
CTCCTAGGGACAAATAATTTAAATGTAGATAATAATGTG  
CAATTAGTGAATGAGTTTTTGA CTTTGTTC AAAGTTAAATTATTGGCTCAATGCACTG  
AACTAAAATGCATTGTTATGTTTTGCATCAGGAGAATGATT  
TTTTTACCAGTGATGGGACTCCAAGGAACCCATTTCCAATGGGTGGAGAGGCAAAG  
GTGGTCTTTATGCTGTAGGGTTCACAAGGAAAGGTCTTTCTGG  
TGCATCATTGGATGCAATTAATGTGGCTCATGACATTGCCAAGAATTGGAAAGAGGAA  
AACAAACAGAAGAGGAAAACAGTGGCTGCACGCCACAGGAGA  
TGCATATCACACTTCTAATTAAGAGACTCGTCACTTTGATAATGACAAACATTTTGGGA  
TTTAGGATTGTTTTGTTTCTTGCTGATCAATCCAAAACAAA  
AGAGTTAATGATGATGAAGATAAGTTACAAAATAGTAGAAGTCCCTAATAGAAAATAGA  
ACACTTGAGTCTCTCTAGTTGGTTAAGTTGTGGGGATATGA

ATTGTATAAGTGTGCAATCTCCCACAATAAGCTTTGTTCCCTTGTCATCTCTTCCATGC  
CCTCCCTCTTCTTAAGGTCTAAATATAAATCTCTCTTTAGA  
AAGGAAAAAATAGCCCTCTCCTTAAGGAAATCCACTGTTTGAAAATGATTTGGCTG  
TTAATTTGTACAAAGGACGATGAGGCTTATTTGCTTCTTTTT  
TCAACGTAACTGTTTATTGTTTTTTAGTTAGTTGTAAGGAATATTGATTCATACCATGAT  
GAATATTG

>AtYUC4(At5g11320)

ATGGGCACCTTG TAGAGAATCAGAACCTACTCAAATCTTCGTTCCCTGGTCCGATCATCG  
TCGGAGCCGGGCCTTCCGGTCTAGCCGTAGCGGCTTGTTTGT  
CAAACCGAGGCGTACCATCGTTATCCTCGAGAGAACCGATTGTTTAGCTTCTTTATG  
GCAAAAAAGAACCTACGACCGTCTCAAACCTCCATCTCCCTAA  
ACACTTTTTCGAGCTTCCTCTTATGCCTTTCCTAAAACTTCCCCAAATACCCATCC  
AAGCAACTATTCATCTCCTACGTTGAGTCTACGCTGCCCGG  
TTTAATATCAAACCGGTATTTAACCAACCGTCGAGAAAGCAGAGTTTCGATGACGCAT  
CTGGTCTATGGAATGTGAAGACGCAAGACGGTGTATACACAT  
CCACGTGGCTGGTGGTTGCCACAGGGGAAAACGCTGAACCGGTGTTTCCGAACATA  
CCCGGTTTAAAGAAGTTTACTGGACCGTTGTTTACACACCAGTGC  
GTACAAGTCCGGTTCGGCATTTCGCAAACCGGAAGGTTTTGGTGGTTGGTTGTGGAA  
ATTCCGGTATGGAGGTCAGCTTGGATCTTTGTAGATACAATGCT  
CTGCCTCATATGGTCGTTAGAACTCTGTAAGTAAAATATTAATCATGCTCATTATTA  
CTCTATAAGCTTTTGTAAATATAAGTAGTAACCGGGTCTA  
ATTAATGACGCAGGTACATGTATTACCAAGAGACTTTTTTGGTCTATCAACATTTGGAA  
TAGCCATGACACTACTGAAATGGTTTCTCTAAAGCTGGTG  
GACAAATTTCTCCTACTTCTTGCTAATTCTACGTTGGGCAATACCGACCTTTTAGGCCT  
TCGACGACCTAAGACCGGACCAATTGAGCTAAAGAACGTCA  
CCGGTAAAACCTCCCGTTCTTGATGTCGGTGCCATTTCTTTAATCCGATCAGGACAAAT  
TAAAGTAAGTTCATAATTTTTCTTCTTCTTAAAGTAATACTA  
ACCATCTAGAGTAAATTACCTTTTTAGCTAAAAGGTTAGATATATGAAAAGTTTGCATGC  
GTGCGTTTGTACTTGAACCTGATTTGTCTTGTGGGTATTAA  
CTATTAGGTGACGCAAGCCGTGAAAGAAATAACGAGGAACGGGGCAAAGTTTCTGAA  
TGGGAAAGAAATTGAATTCGACTCCATAATATTAGCGACTGGG  
TATAAGAGTAATGTACCCGATTGGCTTAAGGACTTTTAAAGCATATACTATTTATCATATT  
CTCTCTCTTGCTATATATATGTCAATGTGTATATGTATA  
TGTGATGATGATGAAATTATGTGAAGCAACAACATACGGATGCATGCAATTA AAAACTT  
CGTTTTCAAGAATAACGGTGTGCTGATGGTAAAATGATAA  
AGATATGGTATATAGACTAAAACTAAACAATAATACGTTTGTAGTGTATCATTAGTGA  
ATCACACATCGCTTCTATGATATGGACACAACACATGC  
AACAAAGGGAACAAGCAAGACTCCAAAACCTTCTTTTTCTCCATGCAAATGGAATAA  
ACCTTCTTCACTATATAAAAACTACTAAAAAGCTCGTTTGT  
TTTTCTTATTTTCTTTGTCTCATCTCCCTCATATCTTTATAGTTTTGTTTAAAGAAATTA  
AAATAATATATATGATCATTTTTGAATTTCCAGGAGA  
ATAGTTTTTTCACAAAAGAAGGAATGCCAAAACGCCGTTTCTAACGGATGGAAAG  
GAGAGAAGGGACTATACACGGTGGGTTTACGAGAAGAGGACT  
TTCGGGAACAGCCTATGACGCCGTTAAGATCGCTGAGGATATAACAGACCAATGGAT

GAAATTTAACGGTCCGTTGAGTTGTAGGAATATTTGTAGTTCC  
CATATTATTCATCTTCATTTCAATAAATCCTAATAATTTGGTTCTTTTCTTGTTCTCAATTT  
TGACTTGTATCTTTTTTCATGGTCGCTAATGAAGTTAG  
TTAGCTTTGTTGTTTATTTAATATTGAGTAGTTTCCTCATTTTCCAAGCTTCCATGCGTT  
GTAAATTTGGTAATATTTACTTCTTTGGCTGTAAAATAAT  
ATCTAAATTTTGGTG  
>Glyma.04G070100  
GTAAATTTCTCTTTCTATCTCAAGAATTGTGCTTTCCATGCATTTAAAAGGCGCACAC  
ACCCCTCCAGCAACTCCCTGCTGGCCTGGAAAAAGAAAA  
GCAAATTAAGAGGGGCTTAGGATCATTTTCTGTTTCCTTAATTCCTTGCTCAGATGGAG  
TCCTTAAAGGGTGAAGAAGTAAAGTGCCTGTGGGTTTCAGGG  
CCCTATCATCGTAGGAGCAGGACCCTCAGGGCTAGCCGTGGCCGCGTGCCTCTCCC  
ACCATGGAGTGCCCTACGTCATTCTCGAGAGGAGCCACTGCATC  
ACCTCCCTCTGGCAACACAGAACCCTACGACCGTCTCAAACCTCCACCTCCCCAAACAC  
TTCTGCGAACTCCCCCTGATGCCCTTCCCCCTCCATTTCCCAA  
AATACCCCTCCAAGAACCAGTTCATCTCCTACCTCAACTCCTACGCTTCTCGCTTCAA  
CATCCGCCCCAGGTTCAACCAATCCGTTTCAGACCGCCGAGTT  
CGACCCTTCTTCTCAGCTTTGGCTCGTCAGAACCAACGGTTTTTCAGTACATTTCCCC  
GTGGCTCGTCGTTGCTACCGGAGAGAATGCTGAGCCTGTTGTT  
CCCTCCATTTCTGGCATGGACATGTTTCACGGTCCCATTGTTTACACCAGCGTCTAC  
AATCTGGTTCTGATTACAATAACCAGAGGGTCTTGGTCATTG  
GCTGCGGCAACTCCGGTATGGAAGTTAGCTTGGATCTTTGCCGCCACAACGCCAAC  
CCTTACATGGTTGCAAGAAACACAGTAAGTAACTAACTAACTAA  
CTATATACTCATGTTTTTTAATTAAGTTGTGGTAAAACAAAATAACTTGATACTATGGTC  
AATATTTGCGTTTGAGGAACGCTATTTACAACCTATAGTA  
TATACATCTATGTTCTTGTTGTTTCCCATGCATGTTTTTCTCATTTGGGTAACCTACTTAA  
AATATGATCAACAAAACCTAGATGCAATTACTCAATTGTT  
TTTGGTGTGTTTTTTCGATCACATTTAGTTTTACTTTGGGAATTCCTATTGATCTTTAAT  
ACAAACCTTTAAAGTTTAAATCTTTATTGTAAAAGTTTCC  
ATTAAAGATCAACTAATAAATATTTATATTAATAAATCAATTTATATATATATAATCAAGTT  
CAAACCTAATTTAGACTTAAAATTACATCAAGTTA  
TATCGTTAATAAAATTGATATTCTAACAATAAATATTTGTCAATAAAAAGAATTGAGTTTA  
TATAGTTAAAATATGATAAATAATGGTCAATAGTGTGT  
TTGTTGACTCATGGTTTTATGATACAGGTACATGTTTTGCCTAGAGAGATGTTTGGGTT  
TTCGACGTTTGAATAGCTATGGCTCTCTTGAAATGGCTTC  
CAATAAAGGTAGTAGACAAGTTGGTTTTGGCGGCGGCTAGGTTAATGTTGGGTGACA  
CCGCTCGTTATGGCGTTAGGAGGCCAAAACGGGGCCTATAGA  
GCTCAAACCTAGTAACCGGGAAAACCCCTGTGCTTGATGTTGGACAAGTGGCTCAAAT  
AAGATCCGGTAACATAAAGGTACGTCTGCATTAATTTAACGGC  
AACCAAATTATATCACCATGCTTCGTTTGGCTGATTATAATGTACTTTAAAACCAATTAA  
GCAGCTATATATATATATATATATATATATATATATATATATATATATATATATATAT  
ATATTTCAATTTTGGCATGTCTAGAGTCTATTTCTAAGTTTGGTTAGGGTTTGTGTCAGG  
TGATGGAAGGTGTGAAGGAGATAACAAGAAATGGTGCCAAG  
TTTATGGATGGACAAGAAAAGGAGTTCAGCGCTATAATATTGGCAACGGGATACAAAA

GCAACGTGCCCACTTGGCTTAAGGTAAAAAAAATTACCTTT  
CCTTCCGCATTTTTACGTCTATCTTGCGTATCAGCAATTCCAACCTATTCTTTTTTCTTAT  
TTGAGTTATTTCTCTATTTTCTTGAAGGCATATAGTACAC  
TCTTTGAAGATGTGAACAAACATTAATATGCATTTTATTTCAGTTTTAATTGTTTTATTAAT  
TAAAAACAAATAACTAGTATTTCAAACGTACATGCACTT  
GTTGAGTCAGTGGGTGGTTTTGGAGTTGGGACTTGCATAGCAGAAACCAACAAAGG  
GGTTCTTTTTCTTCATGCAACAACAATGAAAGAAAGATAAAGAG  
ACTTTGGGGTTTGCCTTAACAAATTTGAAACTTTTTTTCATTCTAGTGACGTTTCATGTG  
AAATATCCCGTTGGCTACTTGTAATAATTACACCTAAAACAA  
TGCCCTTTTTGTTCTTTCCGTCGTTTCGAGATGTGTAATGCTTCTGATCGAGCTGAAA  
AACTGCAGTAATCTGATTTGTTCTTCTCACCATTCTTCTG  
CTTTAATTTGTTATTCCAAACAAGTTTATGAGTTTTCTTTTTCTGGGTCAGGCAAAGC  
CTCTCCATATTTGGGTGCATCAGTGCAATGCCATCACTAAA  
ATGACAAAATTTACAACCTCCATCACCATTATGATAAAAAAATTATTATTATTATAAT  
TTCTGATTGATTGTTATAATCAACATGCCTATTAAT  
CAAATTTACTTATTTATTTGTGAAACTGCAGAGCTGTGAATCTTTCACCAAAGAC  
GGAATGCCGAAAACCTCGTTTCCAATGGGTTGGAAGGGAGA  
GAACGGATTATATACAGTGGGGTTCACGAGAAGAGGTCTTCTTGGAACTGCATCAGA  
TGCCGTAAAAATTGCTAAAGACATCGCTGATCAATGGATGACC  
GTTAAGGACAAATCATACCGTAATTCACATCATCTTGCTCAAGAGTACATAGGATCA  
CGTGCGTAATCTTGAATATTGTCCTGGATATTTTTTTTTT  
TACCTCTTTACAGAGGTTTTTATTTTTATTTTTTTGTGTATGTACAATTTGTATTTTCA  
GTTCAGCAGCATTCTTGTGTCTAAACTTTTCACCTATTG  
GCTTCGTTTGAACAGTTGCGTAAATGAAATGCTATCTTTGTTCAAAGAA

>AtYUC5(At5g43890)

ATGGAGAACATGTTTAGGCTCATGGGAAGTGAAGATTCCTCCGACAGAAGACGGTGC  
ATTTGGGTAAACGGTCCTGTAATCGTCGGAGCCGGGCCATCGG  
GGCTAGCCACGGCAGCCTGCCTCCGCGAGGAAGGTGTTCCCTTTGTGGTATTGGAG  
AGAGCAGATTGCATAGCTTCACTATGGCAAAAACGAACTTACGA  
TAGAATCAAACCTTCATTTACCAAAGAAAGTTTGTCAATTACCCAAAATGCCCTTCCCGG  
AAGACTACCCGGAATATCCAACAAAACGACAGTTCATCGAG  
TACCTTGAGTCCTACGCAACAAATTCGAAATTAATCCTCAGTTCAACGAGTGTGTCC  
AGTCTGCTCGATACGACGAGACAAGTGGTCTCTGGCGCATCA  
AGACAACATCTTCTCTTCCCTCGGGGTCGGAGATGGAATATATCTGCCGGTGGTTAG  
TGGTGGCGACGGGAGAAAACGCGGAGAAAGTTGTTCCAGAGAT  
CGATGGGCTCACAACGGAGTTTGAAGGCGAGGTGATCCACTCGTGTGAGTACAAAT  
CCGGCGAGAAATACAGAGGAAAGAGTGTCTTGTGTCGTCGGATGT  
GGAAACTCCGGCATGGAAGTCTCTTGTGATCTCGCAAATCACAATGCTAATGCATCCA  
TGTTTGTTCGTAGCTCGTTTCATGTGTTACCAAGAGAGATTT  
TAGGCAAATCTAGTTTTGAAATCTCCATGATGTTGATGAAGTGGTTTCTCTGTGGCT  
AGTAGACAAGATTCTACTGATTCTTGCATGGCTGATTTTAGG  
AAATTTGACAAAGTATGGCCTAAAGAGGCCACGATGGGCCCAATGGAGCTCAAGAT  
TGTTTCAGGTAAGACTCCAGTTCTAGACATCGGAGCTATGGAG  
AAAATCAAATCCGGTGAAGTAGAAATCGTCCGGGAATTAACGGTTCTCTCGTAGTC

ACGTGGAGCTAGTAGACGGTCAGAGATTAGATCTCGATGCGG  
TGTTTCTGGCCACGGGTTACCGTAGCAACGTCCCATCATGGCTCCAAGAAAATGATC  
TGTTTTCGAAAAACGGGTTCCCGAAATCGCCGTTTCCAAACGC  
GTGGAAAGGGAAATCGGGACTTTACGCGGCTGGATTCACAAGGAAAGGATTGGCTG  
GAGCATCAGCAGACGCCGTTAACATCGCTCAAGATATTGGAAAC  
GTGTGGAGAGAAGAAACCAACGACAGAAAATGAGAACACGAGTGGGTACCCGCAG  
ATGCATTTAGTTGCTTAG

>Glyma.19G170800

ATTCTCATTTCCAAACCCAAGTAAAGCAAAGTTTCTCTATAGCTTATAGTTTCTTCAAAC  
AGAAAAAAAAAAAAAAAAACCACTTTCAAAAAACACAAACA  
ACATCTTTGTTTCTCAAAAACCAACATCATTGAGAATGGAGAACTTGTTGCGCCTAG  
TAGACCACGAAGACTTCTTCTCTCGTCGTTGCATTTGGGTGA  
ATGGCCCTATAATCATAGGGGCAGGACCCTCAGGGCTAGCCACAGCAGCATGCCTTA  
GAGAACAAGGGGTACCCTTCATGGTTCTCGAACGTGCAGATTG  
CATAGCCTCACTGTGGCAAAAACGAACCTACGACAGACTCAAACCTCACCTTCCAAA  
ACAATTCTGCCAGCTCCCGAAACTACCCTTCCCTGAAGACTTC  
CCTGAATACCCACAAAGAAACAGTTCATTGAGTACTTAGAATCATATGCTAAGCACTT  
CGAGATCAATCCTCAGTTCAACGAGTGTGTGCAGTCCGCAA  
GGTACGATGAGACAAGCGGCTTGTGGCGGGTTAAGACCGTTTCTTCGAGTGGCGCC  
GCCGCCCGCGGCGAGATTGAGTACATTTGCAGGTGGCTCGTGGT  
GGCCACCGGGGAGAATGCGGAGTGTGTTATGCCCGATATTGAAGGGTTGAGTGAGT  
TCAAAGGTGATGTGATCCATGCTTGTGATTACAAGTCAGGGGAG  
AGCTTCAGGGGAAAGAAGTTCCTGTTGTTGGTTGTGGCAATTCGGGCATGGAACTC  
TCACTTGACCTTTGCAACCACCATGCCTCTCCATCCATGGTTG  
TTCGTAGCTCGGTAAGTTTAATTGTCATACATTGACTAACAGTATAAAAAAATTACACTA  
TTAATTAATCGGAAATCATTATCAGATAGACTTTTAAAG  
AAAATTATCTCGTGTGAATGATTTGCGATCAGACGAGAGTTTTTTTTTTCGGTGAAAGA  
AAGATATGTTTTTCGAGGATGGAATCTAACAGGGGTGTTCTGT  
TTTTTGATACAGGTTACAGTGTTCCTAGAGAAGTGTTTGGGATATCAACTTTTGAA  
TTGGCAGTTATGTTGCTGCAATGGCTGCCCTTTGGCTTGT  
GACAAGATTCTCTTGATCTTGGCATGGTTTGTGTTTGGGGAACATTGAGAAGTTGGGG  
CTCAAAGGCCTTCAATGGGTCTTTGGAGCTTAAGAACACAA  
AGGGGAAGACCCAGTTTTGGATATTGGTGCCTTGGAGAAGATTAGATCCGGTGACA  
TAGAAGTTGTGCCAGGAATCAAGAGGTTCAACAATGGGGAAGT  
TGAGTTTGTTAATGGTGAAAAGCTTGATATTGATGCAATAGTGCTTGCAACCGGTTAC  
CGCAGCAATGTCCCTTCTTGGCTTCAGGTGAGAATATGTTGT  
AGATCGCTTGTTTTTTAAAAATAGAAAAAAAAGGGATTTTATTTATTTTTTCTAATATT  
TTCACCAGAGAAGATTGTCAGTTCAGAAAGCCTTTTGGG  
GCAGATTGATTGTCCTTTTTAACTTTTTTGGGTGGGGGCTGTTTTAGAAGCTTCTTATT  
AGTAAAAATTTTGGAGCAGTTAATTAATGTTGTTTTGGTT  
ATGTTATGTGCAGGAAGGTGAATTTTTCTCAAAGAATGGATACCCAAAGATGCCATTC  
CCTCACAGTTGGAAGGGAAATGCTGGGCTTTATGCTGTGGGG  
TTCACAAAGAGAGGGCTCTCTGGTGCTTCTCTGATGCTGTGAAAATTGCTCAAGATA  
TTGGCCAAGTTTGGAAAAATGAGACTAAGCAAAAAGAAACAGC

GCACTACCGCTTGTGCATAGACGTTGCATTTACAGTTCTAAATTGCTAAAACAAAAGG  
GCTTGACATCACATGACATGCATGACCACTAGCTAGTGCTGC  
TTTAATTTCTTTTAGTCTCAGGAATTTTGTGTTTGTATAAACAAAATAACAATATCTTGT  
AAAAAAACACACACCAAAGAAAAAATAGCACACAG  
ATAGAGCCCTCTCCGATGACCAAGGTTTTATATGGTTGGTCGTTTTTTTTAAAAAAA  
AAACGAAGGATGATGAGGCTTTTACCTTACTTTAATTTTCAT  
TTAATTTTCCCCCAATGTAACCTTACAAATAAATATGTAACAAGTACAGTACGTACTTC  
AATGATCAAGTTCAATGCAAGAATTTCAACTTTCA

>AtYUC6(At5g25620)

GAGAGATAGTCACATCAAACTAACAATCTCTCTCTCTCTTTTCTATAAGTTTGAATGG  
CGATTTAAGAGACCCGTAGTTCTCTGATCATCCTCCGGTTT  
ACACTCTCATCAAAACACAAACACAACGCTTATCTCTCTCACTCTCTTTACTCATTCTT  
CTCATTTGGATAAGATCTCTCTCTTTCTCTCCCTCCTTTT  
AGCAGATTCAATCCAAACCCTAACCTCTTTGATTCCGATCTTTAGAGAATATTTCTCT  
CAAAAAATCCATTATAAATACTTTTACTTAACTAAAACCTT  
TTTTTTTACCATCTCTCTTTTTTTTTTACTTACTCCATATGCCATCAATGTCAAATTGTT  
CTTTCTGTCCTTTGTTCTTAATTAGTGTCACCACCACCA  
CCACTACTTCTATACTACAAACCCTTCTCGTATTCTCTTAACCAATACGTACTTATTACA  
CCAAAAGTCTCTTTCTCTCTATATATATATAGATAACAGC  
CAAGAGAGAGAACCAAGAAGAAGTTATTTTCTTGATGGATTTCTGTTGGAAGAGAGA  
GATGGAAGGTAAACTAGCACATGACCACCGCGGCATGACGTCA  
CCGCGTTCGTATCTGCGTCGTCACCGGTCCGGTGATCGTAGGCGCCGGACCGTCGG  
GACTAGCCACGGCAGCATGTTTAAAGAGAGAGGTATCACGTCCG  
TACTACTAGAGAGATCAAACGTATAGCATCACTATGGCAGCTCAAGACTTATGACCG  
TCTTCATCTTCACCTTCTAAACAATTCTGTGAACTTCCGAT  
TATACCCTTCCCGGAGATTTCCCTACCTACCCGACGAAGCAACAGTTCATCGAGTAC  
CTTGAGGACTACGCTCGGAGGTTTGACATAAAGCCGGAGTTT  
AACCAAACGGTTGAGTCGGCTGCGTTTGATGAAAACCTTGGGATGTGGCGCGTGAC  
TAGCGTGGGAGAAGAAGGCACGACGGAGTATGTTTGTCCGGTGGT  
TAGTGGCGGCACGGGGGAGAATGCGGAGCCGGTGGTACCTAGGTTTGAGGGGAT  
GGATAAGTTTGCAGCCGCCGGGGTAGTTAAGCACACGTGTCATTA  
TAAAACCGGTGGAGATTTCCCGGAAAAAGGGTTCTTGTGTCGGATGTGGAAACT  
CCGGTATGGAGGTTTGTGGATCTCTGCAACTTCGGTGCTCAG  
CCTTCTCTCGTTGTCAGAGACGCTGTGAGTTTCTTTTTTTTTTTTTTTTTTTGCTTTTT  
CGGTTTCTTGATTTTTTTTAAATAGAAAGTATTGTGGAGA  
TTATATTATCCTTTTCTCATGCGTTTTTCGATATTTTTGCTCCTTCATGTTTTATGGCTTCT  
ATTGCTAAAAACAAAATCTTGAAAAGCTTTTTTCATTCA  
AGTTGATCTTCTGATTGTTTTTCTATTCTTAACTCAAAGATATTACCTACTTTTTTACAAA  
CTTTTGCTTTTTGTTTTCTAGATTTTTAGAAATTTTCAGG  
ATTATGTGTGATTCTAAGTATTATCCGATCAATATAATAGATTCATAATTCATTTAATAGT  
ATAAGCTTGACTAAATTCTGTTCCACAAATATGTTTT  
AAGAGGTTCTTTTTTTTACAGCGCTTTAAGATGTTCTCGTTAAAAGAGTTTTAGAAAGAA  
AAAAACTTCATGTTTAAATATTATGGAAAATATTACTTGATT  
AAATGAACACTCATATTTTTGAAGAAAATATATAATATAATTATATGCATAGCTTAAAGA



TTTTTTTTTTACTGTTATCGATAAAAAGTGATTTTTAG  
ATTCATTGTTACAAAAAAAAGATTTTCATTGTTACAAAATTCCTAAGGAAACCAAATT  
ATATACAAATATATCTAGACTAATATTGATCTTCTTTGGA  
AGTTAATTACCATTCTTTATTAATTGGCTGATAATTCAGAGAAATAATCTGCACAAATA  
TTTTCCAATTTTTTGCCTTTACAGTAATTCTTTTAAAAG  
TATCAAATTTCTTTTGCTTTTTCAGTTTGATATTCTTATTATTTAATCTGTTTAGAAAATT  
CAAATTTACGGGAAAATACAAAGGCTGGTATTATCCT  
AATTTAAGATTTTATTCCGTCTTTTAGGCCCTTGACTTCAAGTCCAACAATTTGTTA  
ATATAGTTTTTATATGAATAAAGAGGTTTACCTAATTTCT  
TTAATACATAAATATTATTTTTATAACATTTTCAAAGAATAAAAACTAAGAGAACAACAAC  
TTTATTGGGATTGTCACGAGCACGCGCAAACATTCTCAC  
AAAAGAAAAGAAAAACAGTCTCTTAATATTATTATTCATGATAAACTAATAGATAATAATA  
TGATTTTCTCATCCAAATTATTTATCTGCTGTATTGCTA  
ATTATGTTTTCTTTTTACTTGTGAAGGTGCACGTCTACCACGAGAGATGTTGGGTAC  
TTCAACTTTTTGGGCTGTCCATGTTCTTACTGAAATGGCTGCC  
CATCCGGCTTGTTGACCGTTTCCTTTGGTTGTTCCCGGTTTCATCCTCGGGGATACT  
ACCCTTTTAGGTCTTAACAGGCCCCGGTTAGGTCCACTCGAG  
CTCAAAAATATCTCCGGTAAAACCTCCGGTTCTCGACGTTGGCAGCTAGCCAAAATC  
AAAACCGGAGACATTAAGGTAGTGATAATCTAATCAAAGAAT  
ATATGATATGAATACATACTAAAAACCAGTTTACTGATTGTGATAGTTGATTTTGTTAATG  
GTAAAAGGTGTGTTCCGGGGATAAGAAGGTTAAAACGAC  
ATGAAGTTGAGTTCGATAACGGAAAAACAGAGAGATTTGACGCCATTATATTAGCAAC  
TGGCTACAAAAGCAACGTACCCTCTTGGCTAAAGGTATTCAA  
TAATAATGATAATATTGTTATTTTACCTTTGTCCACCTTCTTTAACAATTTAAAGTCTT  
TATTCTATTTTTCTTAAGACCAAAAATATACATCCATT  
ATGAATTTTGTACTAAATGGGTTTTTGGAAAACATATAATTTTTTCAGGAGAATAAAATGT  
TTAGTAAGAAAGATGGATTTCCAATACAAGAGTTCCCTGA  
GGGATGGAGAGGGGAATGTGGGCTATACGCGGTCCGATTACAAAACGTGGGATTA  
GTGGAGCATCAATGGATGCAAAGAGAATAGCTGAAGACATACAC  
AAGTGTGGAAACAAGACGAGCAAGTAAAAAAAATCTGAATCAAACCTTATTGACTAG  
ACAGTAGAGAAAAGCTAAGGTTTTCTATCAAGAAAACATAAC  
TTGCCAAATGCCGGTAGCGATCGAAAAAAAATTGATGGTTTTGTTTCAAAGGAGGTG  
ATGTAATTAAGACTTATCTCCAGCTGCAATGCAAATTGGGGA  
AAAGAATGAAAAGGAAATTTAGTGAGAGTGATTGTGGTGGGAATTGATGATCATCTGC  
CCCAAAGGAGAGGAGGGGACCCTCTTCTCTTTGCATGCTTAT  
AACCCACTTTGTAAATCTTTCTATACCTTCTTTCTATGTTTCTAATTTTTCTTTTTCTCTT  
TTCTTTCTTTTATTTTTGTTTTTTTAGATTTCCATAGTT  
AGGTATGCTCTTTGTTTTTCTTCTTTTTTTGGTTCAATTTTTTTTGGCAGAGTATTGTG  
GTGAGGTTTTTTTTGTTTATATACATAATCTTTGTTTTAA  
CTAACTTACTTTTTTTTA

>Glyma.14G141200

ATCCTTCTCCGTCTCTCTCTCTGACGAATGCTGATTTTGCCCCGTAGTTGGTGCTC  
ATCCTTGCGCTTAACCCTCCTCCATTGAACACAAACACACAC  
ACACAAACACGAAACTCAGAATTTTTCTTTATTTTTATTTTCTTCTCCATTTTGCTCAAC

CGTGGCCGATAAGACCCTTCTCAATCCCCTCCAAAATTCA  
AGGAACTTGTTACAATCCCAATCCTCCACAACACCAAATCACATCCCAAATCTTCAA  
AAACCAACTCTCAGAGCTTTCACITTCACITTTTCGGTTTTGG  
TTAATCTTGCTCCCAATTGTGTTGAAACATAGAATCCGCCTTGTTTTCCACCGAACTT  
GCTCAAAATATCTTCCTGGGGAGAGTCAGATACTGATCTCT  
TGAGGTACTGAGATCCATTTAAAGAATACATTCTGTATAATTAATTTGTTGCTCATATTC  
ATTGCATTTTTGGATGGACTATTGCTTGAGAGAGCTAGAA  
GGAAAGCAAGCACATGACTCTCTATTCTAGAGAAAATGAAGAATTCATTATCACAAC  
GTACTACTACTAGTGAGAGATGTGTGTGGGTGCCAGGGCCAG  
TGATTGTGGGAGCAGGGCCTTCAGGGCTTGCAACAGCAGCATATCTCAAAGAGAAA  
GGAGTGCCAAGCCTAATCTTAGAAAGATCCAAGTGCATAGCATC  
CTTGTGGCAACTCAAGACCTATGATAGGCTCCACCTTCACTTGCCAAAGAATTTTTGC  
GAACTTCCCTTGATGGGGTTTTCTTGTGACTTCCCACATAC  
CCTACAAAGCAGCAGTTCATAGAGTACTTGGAGAGCTATGCTGAGAGGTTTCACATTA  
GGCCAAGGTTAATGAGACGGTCCAGCACGCGGAGTTTGACG  
CCACGCTCGGGTTTTGGAGGGTGAAGAGCTTGAACAAGAGGGAGGTGGCAACAGA  
GTTTGTGTGCAGGTGGCTGATTGTGGCCACTGGGGAGAATGCAGA  
GGCTGTGGTGCCTGGTATTGAAGGAATGGGGGAGTTTGGTGGGACCATAAAGCACA  
CAAGTTTGTATAAGAGTGGGGAAGAGTTTAGAGGGAAGAGGGTG  
TTGGTTGTTGGGTGTGGGAATTCAGGGATGGAAGTCTGCTTGGATCTTTCGAACCAT  
AATGCTACTCCTTCTCTTGTGGTCAGAGATACTGTAAGAACAC  
TAACCCTTTCTTCTAATTTCTTCTACCTATGATGCCTTTTTTCTCTATTTTGGACAAA  
CTTACTTCTTCTGTTTTCCAATCAAAATTTAAATTTT  
ATTTCATTAAATCGACCCAATAAAAAGTTTACATTGCATGTCAGCATACGATGAAATGAAAT  
GAAAGTTAATTCTATTTGGAGAATACTATAAAATATACT  
TAAAGAACTGTGTAAATTTTGTGTATCTTTTTCTTTTTTTCTTTGAACAAAATAATGTT  
AAGTTGTGGTTTTTGGTTAAAAGTTTGCACGTCGCTCCT  
GTTTTGGAATCGCTGATTTAACATGAACAAGGCTAAATGAAGCGTGGCAACAAGATAC  
CCACTTTTGCTTTCTTTTTTTCTTTGTTGAATTTTGGAAACAT  
AGATTAATTGCTTGTTATGTAAACTCCAGATGGGAGTTTTTGTTTTTGTTTTATTTTTATT  
TTTTGCTGCCTCATAAAGAATTTTACTTTTCAGATAGA  
GAAAATATGGCATACTGTTCAAAGTCTTATATGAAATTCATGTCACTAATCACTACAT  
TAGGAAACACGGAAATTGCAAGGCTTGTCTGTTTATTCT  
GAAAAAAGAAATTATATGAAAAGGCTGATATATATTGTGAGGCACATAATTTGCGAGTA  
AACTTCACCACCTTCATAATTTGGCTTTTCTAACAAAATC  
GCAAAAATTTGTTTCATGCTTGCATCTATAATATGGCCTTAAGTACCATTGGGTTGTT  
CATAAAATATGATTCAGAGTTGGCTATATAGCTTTTTAAATA  
TTATAAATATTAATCATGGTATTTTCACTTTTATTGGGATTCTCAAGCGTGCGCAGCGTG  
CGATAGAAGAAGCATAAGATGACCACTGATTTTCCATACC  
CAGTTGCTTTTTCCCTTCTTTTTTCTTCCCATGATTTTCTTAGCAAAGAGATACTCT  
TTTACCCATTACATATTTAGAGCATGGCCTGCAAACAATTA  
AGGCCTACCAAGGGCTAAAGTACTCCTCCACATCAGCTTCTACCTTTTTCTCCTTTT  
TCTTCCACTCTTCTTATCTGAGTGAAGCTGTATCCCCTCACA  
AGATACTAAAATCTGAAAATTTCTGAGCTGTTATGATGGGGAATACTGAGTTACTCTT

GCCACACGGTTCATATGTCATATATCTAAATTTTATTATAT  
AATATATATATATATATATATATATATAACTTTACTATCCTTATGTACCAATGCATGCAT  
AGATTAAGGACGAATTTTGATTCCCTACATTCAAGC  
AATTAGGGAATCATGAATTTGGATAGTCTTATTGAGATGATAATATTAGTATTCTAAAGG  
TATTTTTAAGTCGAATTTACTTAGAAGTTCTATTCTAATA  
TGATATAGGACATACAATAGAAAGGCTAGAGATAAAAAAGGTCTGAGTAATTTACACAA  
AAATTTGTAGTTCAAACATTGTTGATGTCATTATTCAAATA  
ATATAATTAAGGACTCATAATGGAAAGACTATTATAATAACTTAATATTTAGTCATTTAATC  
TATGTATTAECTCGACATATAGACACCTCAAATCCCCA  
ATAATACAAACACTCATTTGACATTCTTATTTTTCTTTTATTGACATATAGTGTATCTATA  
ATTATATTAGACTTTTTTATTTTTTTCATTTCTTTTTT  
TCTCATTCCAACATTGGTTATCCACAAAACATTATTCTAGAAAAATTGAATATATAACAC  
TATGTTGTGTACTTTTTCACATCACATTTCTTGTTGGAAT  
AGTACAATAATACACCGTATTCATGTAAGAATTTATCCATGTCATGAAGTTTTATTTTTA  
TTTTTTTGGTGTGAAAGGTACATATCTTACCACGAGAGA  
TGCTGGGAAATCAACTTTTGGGTTGCCATGTGGTTGCTCAAGTGGCTGCCCATTC  
GGTTTGTGGATCGGTTCTTCTCATAGTGTGCATGGCTCATGCT  
TGGTGACACGGCTCGGTTCCGATTGGACCGGCCGAAATTGGGTCCCCTTCAGCTCA  
AAAACCTGTCCGAAAGACACCAGTGCTAGATGTGGGTACCCTT  
GCCAAGATCAAAGTGGACATATAAAGGTACCTCCCCTTTTTATCAAATCAAATCAAAT  
TCAACTTTTTCTTTTTTGGAACTCTTAGTTTGAGTGAAAC  
ATTATTAGAAAAATAAGAATTTGGTGTAGTCTAAATTTAGTTAAATGTACGAGGTATTTT  
GAGTTTTAATAGTATATGAATTTTTTCTCTTATTTTATA  
CATTTTTTTAATTGAGTTGGCAAATGTTAATGTTTTGGAGTCATAAAGATCTTAATTGG  
GTTACTTTGTAATTTGAACCTTCAAATGACAATAACTTG  
TGGTGTTTTAATTTATAAATTAATGAATAAACATACAATTTGGTCATTGAAAGGAGTAGC  
AAGTTCTACTTTTATTCAAGTATTTTGACACTGATCGATC  
TTAGTAGGATAAATTTATTAGGACGTTAACACTTTTGAAGGTTCAATAAAACAAGTCATA  
TTTAAGGACTAATTGTATATTAACCTTCTTTTTTCATACAT  
ATTTATACAAATTGATCACTTAAATTATCAACTTGCTAACAAAGTTTATGTAATTAATTTATG  
AATAGTTTTAACACTTTTGAAGGATTAATTTGCATAAA  
TAATACTTTGGAAATCCAAAACAATACAAGTTATATTTAAGGAATAAATTATATATATATAT  
ATATATATATATATATATATATATATAGTTAACATTCT  
TTTTTCATTGATTGTGCATATGTTAATATAAATTGATCTATGAAGTTGCTACAACAAATTT  
ATTTAATTAECTAGTGAATATTTTTTACTTAAAAGAC  
TAACTTTGTATAGACAAAAGTTTTAAGGACAGAAAAACACAACTGTAACCTTTGATAGA  
GACCAGGTTGTATATTAGAACGACCATTTTTATTTCTTTAG  
CGATAACAATCCAAATAATGACAAGAAAGTTAGTTTGCAATATATCATAAGATCATATTT  
CGGTGCCGTCATAACCGCAATCCGTGGTTTTTTCTTAATA  
TTATTGTTAAGTGCCCTTTTTTAACTTGTATATTTGTTTTGCCTTTATAATTTGCTT  
TTCGTGAAGCACAAATTACAATTCCTAGCACTCTTT  
TTTAATTTTTATGTTCAATGAAATGACCCCTATTAATGTGTTTTCCGCCTTTGTTTTT  
CATTCGCAACATTTTCGATCGTTGTGTGCTTTCAGTCAA  
TCACAAGGTCTTATAATATCTGAGATTTTACAAAAGCTAATGGACAAAAGAATGATCATT

ATTATTATTATTTTCAATCATGTTGTTGGGGGAGCGTAAT  
TATTATTTTGCATTTAGATTGTTGTTTGTGTTGAATTGAACGCCGCAGTCCACTCACACA  
AATTGCTGCAGGTACGGCCTGGCATCAAGCGCTTAAAACGT  
TATACTGTTGAATTTGTTGATGGAAGGACAGAGAATTTTGATGCCCTCATATTGGCAAC  
TGGTTACAAAAGTAATGTGCCCTATTGGCTAAAGGTATATA  
TCAATACGATAAATTCTTCTTCTTTCTTTATTTTGATTTGAATCATTAAAAACATAAAG  
GAATGTGATGTGTTTATTCTGAAATAAATTAGGTTTACT  
TTTTCTTACAACATAAATTAGGTTTACTTTTCGTCTTGTTTTTTTTATAATTTTTTTACTA  
GTAGTTGTTAGAAAAGAAAATAAAAATAATGATTTTTT  
TCTTACAACTAAAATTAACCTTTATACACTTAGCTTTTATATAAATTTTTTCATCTAATTC  
TTCAAATATGAAGTGATAAATAGATTTTAACTTATA  
GAAAAAATCAATGCATACTAGCTACTTTTTTTAATTTTTTTTCTCACAATAAGTACTCA  
AAGAGAGATTTTTCCAAACATATATCTAATAGATTTCT  
AAATTATGAATTTAAGAATTTTATCATTGAATTATGTAATATTACAACTTTTTTATTATGCA  
AATTAATTTTTAAATAAATAATATATTTTTTAGTTATG  
AAAATTTATAATTAACATTAATTTGATTTTAAATGGTAGTTGATTGTTGAAAATTAATTAG  
TTTTTGGGTATTTTAAAATTTGTAGATTTGATCAATTT  
AATGAACTTTTTTATTTTATTTTGCACAGTAAAGATAATTATATATTATATAATGAAAAAC  
AGTTAGCCACTTTCAATTTAATAAAAATTCAACGGTTAT  
GAATGAGGAAAACACAGGAGAATAAAGACCCTCTCTATCTGAGTTTTGAAAATGATAT  
AAAGCAAGAAAAGAAGCTAATATAATCCGAATGGCATATGTG  
CAGGAAGAGGATATGTTCTCTAAGGAAGATGGGTTCCCTACGAAGCCATTTCCAAAT  
GGATGGAAGGGTGAGAATGGGCTCTATGCAGTTGGTTTCACCA  
AGCGTGGACTACTTGGTGCATCAATGGATGCCAAGAGAATAGCTGAGGATATTGAAA  
GGTGTGGAAAGCAAAGCATAGTACTTCTTTTTCTCTCACT  
TAATGTGCCACAATCCAATTCATGATAGGTTTGAGTTTAAATTTGGTTTTGGCCCAATTA  
GAGATTATAGAGAAGAGATTGATTAAAGTTGATTTATACAC  
ATGAATATTTGAGATTGGGAATTTTGTGGCGCCATCATAACGTCACAATGCTATG  
CTAGCTAGTACCAAGAGTGGTGCTCCTCCAATCCATACAAGG  
ATAAGTGGACCAAAAAAGAAAGGAAATTGGTGGGGGAAAATTTCCCATGTGGTGC  
CCTTCAGCTGAATTTTGATGCATATTCATTTGTCAACATATAT  
GGATTTGAGAATGAGATGTTGAATTGAAATTGAAGAAGGATTCTAGCTTGGGGTGGG  
GTAGGGGCAATTTTTTCTACCTTAGTTCTCTATGCATTTTGTA  
CAGTGCAATTTTTTTTTCTAATATATGTAGTTTGACTTTCTAGAGAACAAGGGAAGC  
AAAGTACTAAGAAAAGAAGATGACAGATGAAGAAGATAGT  
CTTTGGTATGTGATTGTGGTTAACCTATATCCCATGGAATTTTTAAATACAAAATAG  
AGTATGAAATTTTGATGCTTTTTTGTCTGCCCTTTGAGGC  
CCGAATGCTCCGCGGTTTAGGTTTTTCTTTCTTTATTTTATTTTGTAACTTTAAA  
ATCGAACAGAATA  
>Glyma.04G079700  
TTCTCAGTCTCTCTGTGATGAATGCTGATTTAGCCCCGACTTGGTGCTCATCCTC  
CCGATTAACCCTCCTCGGTATTGAACCATATCATACTATA  
CTATATAAGAGAGAGAGAGAAAATAAGAAATTATGATTCTTGTTTAGTGGATAAGACC  
CTCTTAATCCACTCCAATTTTACGGAAATATTTTACACAC

AAGCCAAATCCTCCTTCAGATAAGGCACCAAAAAATTACCACTCAGCTCACCCCTAATC  
CTTCTGCAAATCAAGACTAGAGAGAGTCAGAGAAAGAGAGAG  
AGAAAGAGCTTTCTCTCCAACGTGGTTTCTTCTTACTTACCCGGTTCTCTGTCTCAA  
CAGAACCAGTTCTTTTTTCAGTTCTCCAGGTAGCATACTGG  
CCGAGAGTCGGAGACTAATCTTCTTCGAGATACCCAGACCTGAATTCTTTTTTTCTTC  
TTCTTTTTTTCATTGCATTCTTGATGGAATATTTCTTGAGAGA  
AATAGAAGGAAAGCAAGCACACGACCCGTTGTTTCATGAACAACAACAAGTCATCATT  
GTCGTCATCGTCGTCATCATCTTTTTCCACCGTGTGGGTTTCAT  
GGCCTGTGATAGTAGGAGCCGGGCCTTCAGGACTCGCAGCAGCAGCATGTCTCAG  
GGAGAAAAGTGTCCCAAGCGTGATACTAGAGCGATCCAATTGCA  
TAGCATCTCTATGGCAGCTCAAACCTATGATCGCCTACGCCTTCATCTTCCAAAGCA  
ATTCTGCGAGCTTCCCTTCATGGGGTTCCTTCTCACTTCCC  
AACATACCCTTCAAAGCAACAGTTTGTACAGTACTTGGAGAATTACGCGGAGAGGTT  
CGGGATTAGGCCGAGGTTCAATGAGACGGTGCAGCATGCGGAG  
TTTGATGCGAAACTCGGGTTGTGGCGGGTGAAGAGCGTCGACAAGGCGGAGAAGA  
CGACGGAGTACGTGTGCCGGTGGCTGATCGTGGCCACCGGAGAGA  
ATGCGGAGGCGGTGGTGCCGGATATAGAAGGGGTGGAGGAATTTGGCGCTCCTATA  
AAACACACGAGCTTGATAAGAGTGGGGAAGAGTTCAGAGGGAA  
GAGGGTTTTGGTTGTGGGGTGTGGGAATTCGGGGATGGAAGTGTGCTTAGATCTTT  
GCAACCATAATGCTACTCCTTCTCTTGTGGTTAGAGACACAGTA  
AGAACTCTAACTCTCACTCATCTTTTCGCCTTTGAATTATGGTTATGAAAAAAGAAA  
ACAAGAAAGAAAAATCTGTGCTTTTTTTTTTTTTTTCTTTT  
CTTCTTTCCAATAGTTCATGTCCCTCCTATTTGGAATTTCTGATTTAATATGGAAAAGG  
TTCGTTTGCAACAAGACGCCCACTTTTTTTAATCGTGTT  
GTGTTGTTGTGACTTTTGTGATGTTTCGAAATATACACCGTTTGCTTTGCAAATTAAC  
CAACGATGGGGATTTTACCTTTTTTCTTCTCATGCAAAAAT  
TCATAAACTTTTCGTGAAATATACTGTTACAGGTTTCGTACATAAAATTTTGCATCACTCAC  
CACTATCTCACTATCTGAAAAACGAAATTGCAAGGCTTCT  
TGTGTTCTTTCTGAAAATAAATGGAATCAGTCCAAGTAAGATTCATGTAATATCCAC  
AAATTGGGCTTTTCTAGTCTAACACACAACTTCATACAAA  
TTACAAAACCCTCGTTTCATTCTTGCATCGATCGGCTTCAAGTTCCAATAGATTGTTA  
AAAATGATTCAGAAGCTTTTTAATTTAATTTACTTTATTA  
AAAAAAATTCTTTTGAGGAACACGAGTCTTAAATTTGATCTTGAACCTTCTTGATT  
TTTAATTAAGCATGCGCAACATAGGTGTGTGTGTGTGTGTG  
AGATCAGTGATATTTTCATTATTTGGAACCCAAAACCTTCTTTTCTTGTGTTCAATTT  
TTTGAGTGTTATCCCAAAAAAATCAGGAGGTAAGGTCCT  
CGTGCATCAACTCCCACCTTTAATTATTTAATCTTTGGAGTACTGAAGTTGTTTTGTT  
TTTACATTTTAGTAATTAATATTGTTGGTGTTAAATATTT  
TTTTGGTGGTTTGGTTTGGTTAAGGTACACGTCTTACCACGAGAGATGCTGGGAAAA  
TCAACTTTTCGGGTTGTCCATGTGGTTGCTTAAGTGGTTACCCA  
TCCGACTTGTGGATCGATTCTTGCTAATGGTGTGATGGCTTCTGCTCGGTGACACTT  
CTAAATTAGGATTGGATAGGCCGCGTTTGGGTCCCTTAGAACT  
CAAAAACCTTTTCAGGAAAAACCCCTGTGCTAGATGTGGGTACCCTTGCCAAGATTAA  
AGGTGGAGACATTAAGGTAGTTCAATTTCCCTCCTTGCCTTT

TTATCAAATCAATTAATTTTCATCTTTCTTTTTTAATCTCAACAAAGATCTTATTTTTCACTT  
ACACCACCATGCTTTTTCAATTCTAAATGGTGCTACCT  
AATTTTTTTTTCTTTTGCTTTTTTCATCAAGTGCCACATTAATAATTATTTTTTCATGATCAACT  
CCCCCTCCTTTTTATATTTAATGAAATGACCCCCTTAC  
TGAGTTCCCTTTTTTTTTCCCCTTAGATTTTGTTTTTCCATCATTGTGCGTTTTCAATGA  
AATCGTGGGCGGAAAGCACAAAGGTCTAGAGTATTTTTGGT  
TTGTTTAATTATTAATAAATATCCCAAAGCTAGTCGACAAAAGACGTTCACTAATCACTA  
ATCATTGTTTTGATCACGTTTGGTGGGGTTATTATTTCCG  
TTAGATTGGTTTGTTTGAATCAACGCACAAATGAATCAAATCTGAGTGTGTCAAAC  
CAACATTTGATGTAGGTACGTCCAGGCATTAAGCGGCTTAA  
CGTCAAACGTGGAATTTGTGGATGGAAGGACAGAGAATTTTGATGCAATCATATTGG  
CAACTGGTTACAAAAGCAATGTACCCTATTGGCTTAAGGTGT  
GACACATGACACTTACCCGTTCTTCTCTAAATTTAAATTCATATAGTATTAATACAA  
CTATAGTTAGTAATTTTTAGCAAATTTATTTTTTGAATGA  
TACAAAGCAAATAATACTGATACACTTATATGGTTGGAAAATTGTGTAGGAAGAAGATAT  
GTTCTCTAAGAAAGATGGGTACCCTAGGAGGCCATTTCCA  
AATGGGTGGAAAGGTAGAAATGGGCTCTATGCTGTTGGTTTTACCAAAAAGGGTCTA  
CTTGGTGCATCCATGGATGCAAAGAGAATAGCTGAAGACATTG  
AACAGAGTTGGAAAGCTGGGGCAAATCATAGAACTACTTTTGCTCGTTCACACTTGC  
CGCAACCAAATTCATAATTTATAGTATTAATTTGGTTTTGGCT  
AGGTGCAAACACACGAAAAGGGTTCATCAAAGAATGATATTGGAAGGAAGGAAGG  
AAGAAAAAAAAAATCATAATTGATGTTTGGGTTTGGCCAAGGG  
GCAAAAGAGAAGAGATTTGTGCAAGTTGGTACATAAATGGAAACGGAGGTTTTTGGT  
GGTATTACGCTATCATACGTGTTCAATGCTAGTACCAAATGA  
TGCTCCTCCAATATCCATGCATGGGTGAAGTGGGCAAAGCGAAAGAAACATGAGGA  
GGAATTTACTTTGATGCCCTTCAGCTTAATTTTATGATGGAATCA  
TCGGTCATGGGGTTGAGAAGATATTGAATTGAAGTTGAAGGAAAGAAAGATGGCGGA  
TTTTTCCTGGGGGGACCTAGCTTAGGTCTGGATTCTATGTGC  
GTCTTGACATTGCATTTTTTTTTTTTTTTTTGCCTAAGTAGGTTTGACTTACAAGAGG  
GAGAGAGAAAGTAAAAGAGAAACAGAGTTAAGAGGACATG  
TTCAGTTTAACTATATTTCTTTTTTTTTCTTTCCCTTTTTCTAGAACTAGAGTATAA  
CATTTTGATTTTTTTTTGGTGGCATGTTTGGCTCTCTGAA  
TGCTTAAATCGTTTGGCTAGGGGTTATCTTTCTTTGTTTTGTTAACAAACTTTGGAGAA  
AAAACCAAAGTCAGTTAAATGAGAAGGCTAGGGGGAAAAA  
AACTTTTAGCTTGGGATGAAGTGCTAGATTGTGTACCATTTTCATTATCACTTCCATG  
CAATTTCAATTGTGCAAATGATTTCAATCCAAGTTGGAATCA  
GGACCACTCCCTCTTTTCAGCACAGAAGCTTGAGAATGTGCGTTTGGAAACAGCCA  
GAAGCAATTAATTTAGGGAATTACAGTAGATTTGTTATCACAT  
TTATTATCTACTACCAACTTCATTAAATTGACACCGCTCTGAGAATTCAAGCAACGGG  
AAATGATTTGGACAAGCCATATGTGGTGGCTTTGCATCATC  
AATCGCAACCACCTTTTAGAATTACCACTCACAAATATGAAATATGTAATTGAAATTTT  
AATTTGTAAACATTATTTTACTTTTTCCCTTGCTTTGTC  
AGAAAGAGAGCAGTGTCCAGAGTCATACAACCCACCTACTATGTGGAAGTTCCGA  
>Glyma.17G189700

TTAATTGCTTTGGCTCATTAAATTCTTGAACGAAGCAGAGTAGGAATATATATATATATG  
TTCACACACATACAAAGAGAGATATCACCATCCTTCTCA  
GTCTCTCTCTTGGTGATGAATGCTGATTTTGCCCCGTAGTTGGTGCTCATCCTTCCGC  
TTAACCCCTCCTCCATTGAACACACACAAACACAACACACAGA  
ATTTTTGCGTTATTTTTATTTTTCTCTCCATTTTGCACAATAGTGGATAAGACCCTTCTC  
AATCCCCTCCAAAATTCAAGGAACTTGCTCACAATCCCAA  
TCCTCCACAGCACCAAATCACATCCCAAATCTTCCTCATAGAGCTTTCACTTTCACTTT  
TTGGCTTTGGTTAATCTTGCTCCCAATTGTGTTGAAACCT  
AGAATCCGCCTCAAGATATGAGATCCACTTAAAGAAGAATCCACTCCGTATAATTTGTC  
GCTCTTCTTCATTGCATTTTTGCTTGGGGGAGAGTCAAAGA  
TTAATCCTTGGAGATACTGAGATTCATTTAAAGAAGAATTTGCTCCTCTTCTTCATTGC  
ATTTTTGGATATATGGACTATTGCTTGAGAGAGCTAGAAGG  
AAAGCAAGCACATGACCCTCTATTCTACAGAAAATGAAGAATTCATCATCACAAAGC  
ACTACTACTAGTAGTGAGAGATGTGTGTGGGTGCCAGGGCCA  
GTGATTGTGGGAGCAGGGCCTTCAGGGCTTGCAACAGCAGCATATCTCAAAGAAAA  
AGGATTGCCAAGCCTAATCCTAGAGAGATCCAACTGCATAGCAT  
CCTTGTGGCAGCTCAAGACCTATGATAGGCTTCACCTTCACTTGCCAAAAAATTCTG  
TCAACTCCCCTTGATGGGGTTCCCTTGTGATTTCCCTACATA  
CCCTACAAAGCAACAGTTCATAGAGTACTTGGAGAGCTATGCTGAGAGCTTTGACATT  
AGGCCAAGGTTCAATGAGACGGTCCGGCGCGCCGAATTCGAC  
GCCACGCTCGGCTTCTGGAGGGTGAAGAGCTTCAACAAGAAGGAGGTAGCAACAG  
AGTTTGTGTGTAGGTGGTTGATTGTGGCCACTGGGGAGAATGCAG  
AGGCTGAGGTGCCTGAGATTGAGGGAATGGGAGAGTTTGGTGGGGCCATAAAGCAC  
ACAAGTTTTTATAAGAGTGGGGAAGAGTTTAGAGGGAAGAGGGT  
GTTGGTGGTTGGGTGTGGGAATTCAGGGATGGAAGTGTGTTTGGATCTTTGCAACC  
ATAATGCTACTCCTTCTCTTGTGGTCAGAGATACAGTAAGAACG  
CTTTCTTTCTTTTTTTTTCTTTCTACCTATGATGCCTTTTTTTTTTGACAAAACTTAACT  
TCCTTCTTTTTTCCAATCAGAATTTGAATTTCAATTCAT  
TTCATTAATCCACCCAATAAACTTACATTACATACATGTCAACGTATATTGATGGAAGG  
AATGAACTCTAATTTAATTGGGGAATAATATAAAATAT  
ATATACTTAAAGAACTGTGTAAGTTTTAATTTGCGTATCCTTTTTTTTTCTCTTTGAACA  
AAAATAATGTACAGTTGTGGGTTTTGGTTAAAAGTTTGC  
ACGTCGCTCCTGTTTTGGTATCGTTGATTTAACATGAACAATGCTAAATGAAGCGTGG  
CAACAAGATACCCGTTTTGACTTTTTTTAGTTCTTTTTTTTT  
ATGGGTTTTTTGTGATATTTTGTGATACAGATTAATGGCTTGCAGTATGTAAAACCCAG  
AGGGGAGTTTTATTTTTATTTTTATTTTTACTACCTCATA  
ATATAAAAGAATTTAGACTTACAGATAGAGAAAATATGTTATAAAGTTCTTGTATGAAATT  
CCATGCTACTAATCACTACATTAGGAAACACGGAAATTG  
CAAGGCTTGTTCTGTTTATTCTGAAAAGAGAAATTATAGAAAAAGCTGCTATATATTGC  
GAGGCACATAATATGCAAGTGAAGTATCTTACCTCCTTC  
AAAATTTGGCTAGCTTTTCTAACAAAATTTGCAAAAATTTATTTTCATGCTTGCATCTAA  
AATATGGCATCAAGTACAATATTTGGGTTGTTTATAAAAT  
ATGCTTCAGAGTTTGTACAGATATAGCTTTTAAAGTATTATAAAAATTAATCATGGTATTT  
TCACTTTTATTGGGATTCTCAAGCGTGCGCAGCGTGGGA

GAAGAAGAATAAGATGGCCACTGATTTTCCATACCCAGTTGCTTTTTCCCCTTCCTTT  
TTCCTTCCCATGATTTTCTTAGCAAAAGAGATACTCTTTTTTC  
CCATTACATATTTAGAGCATGGCCTGCAAACAATTAAGGCCTACCAAGGGCTAATGTA  
CTACACCCACATCAGCTTCTACCTTTTTCTTCCACTCTTCTT  
TTCTGAGTGAAGCTGTTTCCCCCTCACAAGATACTAAAACCCTGAAAAAATTCTGAGC  
TGTTATGATGGGGAAATACTGAGATACTCTCCCCACACGGTT  
CATATTTCATATATCAAATTTTTATTATATAATATATAACTTTACTAGCCTTGTGTACGAAT  
GCATGCATAGATTAAGGATGTATTTAATTCATGCAT  
TCATGCAATTAGTCAATCATGAATTTGGAGATCATACTATTAGTATTTTAAAGGTATTTTT  
AAATTGAATTTACTTAAATATATATATATATATATATAT  
ATATATATATATATATATATATATATATATATATATATATATATATATAATCATCTGGC  
TGATGAATGTGTATCTTTTTGGACTACCGAAA  
ATCTGGATACAATATATAGAGCATATAATAGAAAGACTAGTGATAGGAGATTTGAGTA  
ACTTGCACAAAATTAATAGTTCAAACATTGTGCGATGCCA  
TTATTAATAAATAATGAAGAGCTCAGAATAGAAAGACTAATATAATAACTTAATATTTA  
GTCATTTAATCTGTGTATTAAGTAGGATAGAAAATCAAC  
CCTTAACATATAGACACCTCAAATCCAGAATAACAAACACTCATTGACAGTTTTTTTTTT  
TATCATCGTACTATGTTAACAATTATATTATCATCACTTT  
TCTCTTTTTTTTTTTATTTCTTTTTCTCTCACTGAGCATTGGATATCAACAAAACATTATT  
CTAGAAAATTTGAATATATAACACTATGTTGGGTACTT  
TTTTACATCACATTTCTTGTTGGAATAGTACAATAATATACATACTGAGTTCAAG  
TAAGAATTTATCCATATATATCATGAAAGTTTTATTTTGT  
GTACGTGTGTTGAAGGTACATATCTTACCACGAGAGATGCTGGGAAAATCAACTTTTG  
GGTTGTCCATGTGGTTGCTCAAGTGGCTCCCTATCCGGTTTG  
TGGATTGGTTCCTTCTCATAGTGTGTCATGGCTCATGCTTGGTGACACGGCTCGGTTTCG  
GATTGGACCGGCCAAAATTGGGTCCCCTTCAGCTTAAAACTT  
GTCCGAAAGACACCAGTGCTAGATGTGGGTACCCTTGCCAAGATCAAAGTGGAC  
ACATAAAGGTACTTCCCCTTTTATATCAAATCAAATCAACTTT  
CTTTCTTTTTTTGGAGGACACATAAAGGTACCCTTGCCATTTTGAAGGATCAAATTACA  
AAGTAAATCAATTTAGATGTTTATCACTCCTAATCATTAGG  
ATTTGTCTACTCAAATTTTTTAAAAAATGAATAAAATATATAAAAAAGAAAAATAAATACAT  
CTACTTTTATAAATTATATATAATATCTCGTACATTTA  
ACTAAATTTAACTATTGATAATCAAATTCCTAATTTTTTCAGATTACCTGAAACAAACTG  
AAGTGGTAATGTAAGAAAATTAAGAATTTGACCACCACT  
AGTTTAAATTTAATTAATGTATGAGGTATTATATATAATTTATAAAAATAGATGCATTTATT  
TTTTCTTCTCGTATATTTTATTTATTTTTTAAAAATT  
TTGAGTAGGCCAAAATCCTAATGTTTTGGAGTGATAAAAATCTTAATTCATACTTTATAAT  
TTGGTCCATGTCAATAATTCGTGTTGTTGTCTAACTTCTA  
AATGAATTAATATATACAATTTGGTTATTAAGGAGTATAGCTAGTTCTGCTTTTATTCA  
AGAATTTGGTATTGATCTTGGTAGGTTAAGTTTATTATG  
AAGTTATATATAGCTTTTGAAGGATTAATAACACAAGTCATATTTAAGGACTAAATTGTAT  
ATTAECTTGTTTATTATTGTACATCTTTATACAAGATC  
ACTTAAAGTATGAACTTGTTAACAAGTTCATGCAATTAATATATGAATAGTTTTAACACTT  
TTGAAGGATTAATTTGCACAAGTGTATGCTTTTTAAAATA



AAAAATCTACACAAGTCATATATAAACTTATTTTTTTATTGTATATTTTATACAAATTTATTC  
CTTGAAGTATAAAGTTGCTACAAGTTCATGTAATATT  
TCAACTTGTTAATATTTTCATTACTTAAAGGACTAACTTTGTGTAGACAAAAGTTTTAAG  
GACAAAAAGAAAAACACAACTGTAACCTTGATAGAGACC  
AGATTGTGTATTAACGACCCTTCTTTTTCTTTAGCTATTAGAATCCAAATAATGACAAGA  
AAGTTAGTTTGCAATATATTATCAAAAGATCATATTTCCG  
TGCCGTCATAACCGCAATCCATGCTGTTTTTTCTTAAAATTATTGTCAAGTGCCCTTAT  
TTAATTACTTGTATATTTTTTTTTCTTTTGCCTTTATATTTT  
GCTTTTCATGAAGCACAACCTTATTACAATTTTATGTTCAATTAATGACCCCTATTTTTTT  
AATTTGTTTTTTCCGCCTTTCTTTTTTTATTTCGCAACAT  
TTTTCGATCGTTGTGTGCTTTCAATCAAATCACAAAGGTCTTAATATAATATCTGAAATTT  
ACAAAAGCTAATGGACAAAAGAATAATCATTATTATTTTC  
AATCATGTTGTTGGGGGAGCGTTATTATTTTTGCATTAGATTGTTTGTGTTGAACACCAA  
AGTCCACTACTGAGCATGCCAACACACACAAATTGCTGCAG  
GTAAGACCTGGCATCAAGCGGTTAAAACGATATACAGTTGAATTTGTTGGTGAAGGA  
CAGAGAATTTTGATGCTATCATATTGGCAACTGGTTACAAA  
GTAATGTGCCCTATTGGCTAAAGGTATACGATAAATTCCTCTTTCTTTTTTTCTTTATTT  
GAATCATTATTAATAATTATAGGAATGTGATGTGTTTCATT  
CTTAAATAAATTTAAAGTTTATTTTTAGTTATGTTATAGATAATTTTTCTATAAGTAGTTA  
CGAGAAAAGAAAATAGAATGGTTGATGTTTCCTCATA  
AATTAAGATCATCTTATGCATTTAATTAATTTTTATAGAAATTCCTTCATCTAATTTCTTCA  
AAAGATAGAGGGTATAAATTGGCTTTAATTTATAAAAG  
AAGATCAATAAATTCTAGCTACTTTTATATTTCTTCTGCTGTATGAGAAATTTTTTCAA  
CATATATCTAATAACTTTCTAAATTACGAATTTGAGGT  
TTTTGATTATTAATATATGTAATATTACTTTTTTTGGTTATTCAAATTAATTTTAGATAAAT  
AAAATATGTATACTTATGAAATCTTATAATTGGCATT  
TTATTATGTTTCAAAGATATATAGTTAATTGATGAAAAATTAATTTGTTTTCAAGTACTTT  
AAAATGAAAATTTGATCTATTTAATGAATTAATTA  
TTCAATGGTTCTGAGTGAGAAAAACACACAGGAGAATAAAGATTCTTGATCTGAATTAT  
GAAAATGATACAAAGCAAGAAAAGAAGCTAATAATATAATC  
CGAATGGCATATATGTGCAGGAAGATGATATGTTCTCTAAGGAAGATGGGTTCCCTAC  
GAAGCCATTCCCAGATGGATGGAAGGGTGAGAATGGGCTCTA  
TGCAGTTGGTTTACCAAACGTGGACTACTTGGTGCATCAATGGATGCCGAGAGAAT  
AGGTGAAGATATTGAAAGGTGTTGGAAGGAAAAGCATAGTAGC  
ACTTCTTTTTCTCTCACTTAATGTGCCACAATCCAATTCATGATGGGTTTGAGCTTG  
GTTTTGGCCCAATTAGAGGTTATAGAGAAGAGATTCATTAA  
AGTTAAGTTATTATACACATGAATATTTGAGACGGGGGATTTTTGTGGTGCCATCACA  
TTCACATGTGCACAATGCTATGCTAGCTAGTACCAAGAGAG  
TAGTGCTCCTCCAATCCATGCAAGGAAAAGTGGACAAAAAAGGGGGCGGGGGCAA  
TTGGTGGGGGAAAAAATCCCATGGTGGTGCCCTTCAGCTTAAT  
TTT

>Glyma.06G081300

CTCTCTCTGTGATGAATGCTGATTTAGCCCCGTACTTGGTGCTCATCCTCCCGCTTAA  
CCCTCCTTCATATTGAACCATACCATACTCACACACTAGATA

CATACATAGAGAGAGAGAGAAAAGAAGAAATTATCATTCTTGTTTAGTGGATAAGACC  
CTCTTAATCCACTCCAATTTAACGGAAATATTTTTCACACA  
GGCCAAATCCTCCTTCGGATAAGGCACCAAAAATTACCCCTCAGCTCACCCTAATCC  
TTCTACAAATCAAGACTAGAGAGAGCCAGAGAAAGAGAGAGA  
GAGAGAGAAACAGCTTTCTCTCCAACGTGGTTTCTTACTTACCCGTTTCTCTGTC  
TCAAGCTGAACCTGTTCTTTTTTTCAGTTCTCCAGATATCTC  
TGGTGGGCCGATTGTTTGAGACTCATTAATCCTCCGATATATCCAGAGACCTGAATTG  
TTTGTTTTTCAATTTCTTTTTCTTTTTTCATTGCATTCTTCA  
TGGAATATTTCTTGAGAGAAATAGAAGGAAAGCAAGCACATGACCCGTTGTTTCATGAA  
CAATTACAACAAGTCGTCGTCATCGTCATCGTCGTTTTTCGTC  
ATCATCTTCTTCCACCGTGTGGGTTTCATGGGCCTGTGATAGTAGGAGCCGGGCCTTC  
AGGGCTGGCAGCAGCAGCATGTCTGAGGGACAAAAGTGTCCCA  
AGCGTGATACTAGAGCGATCCAATTGCATAGCATCTCCATGGCAGCTCAAACCTATG  
ATCGTTACGCCTTACCTTCCAAGCAATTCTGCGAGCTTC  
CCTTCATGGGGTTCCCTTCTCACTTCCCAAATTACCCCTTCAAAGCAACAGTTTGTACA  
GTACTTGGAGAATTACGCGGAGAGTTTTGGGATTAGGCCGAG  
GTTCAATGAGACGGTGCAGCATGCGGAGTTTGACGGCAAACCTCGGCTTGTGGCGG  
GTGAAGAGCGTGGACAAGGTGGGGAAGACGACGGAGTACATGTGC  
CGGTGGCTGATCGTGGCCACCGGAGAGAATGCGGAGGCGGTGGTGCCGGATATCG  
AAGGGGTGGAGGAGTTTGGCGCTCCTATAAAACACACAAGCTTGT  
ATAAGAGTGGGGAAGAGTTCAGAGGGAAGAGGGTTTTGGTGGTGGGGTGTGGGAA  
TTCGGGGATGGAAGTGTGCTTAGATCTTTCGAACCATAATGCTAC  
TCCTTCTTGTGGTTAGAGACACAGTAAGAACTCTAACTCTCACTCATCTTTTCGCC  
TTTGAATTATGGTTATGAAAAATAGAAAACAAGAAAGAAAA  
ACCTGTGCTTGTTTTTTTTTTTTTTTTTCTCTTCTTCTTCCAAAAGTTCATGTCCCTCC  
TTATTTGGAATTTCTGATTTAATATGAAAAGGTTTCGTTT  
GCAACAAGACGCCCACTTTTTTTTATTTCCACCTTTTTTTAATCGTGTTGTGTTGTTGTG  
ACTTTTGTGATGTTTCGAAATATACACCGTTTGCTCTGCAA  
ATTAAACCAACGATATGTTTTCTTTAAATTTTTCTCTTCTCATGCAAAAATTTAAAA  
AACTTTTCGTAAAATATAGTTTTCAAGGTTTCGTAATAA  
AATTTTGCATTACTCATCACTATCTCACTATCAGAAAAACGAAATTGCAAACATTTTTTT  
CTTCGTTCTGAAAACAAAAAGGAATCAGTCCAATTAAGAT  
TCATGTAATTAGATATCCACAAATTTGGCTTTTCTAGTCTAACACACAACTTCACACAA  
ATTATCAAACCCTCGCTTCATTCTAGTATCGATCGGCTTC  
AAGTTCCAATAGATTGTTAAAAAATGATTCAGAAGCTTTTTAATTTTATATTCTTTTTATT  
CACATTTTTTTAATATTCTTTTGAGGTAAAAACACGAG  
TCTTAAACTTGATCTTGCACCTTTCTTGATTTTTAATTAAGCATGCGCAACATAGGTG  
TGTGTGTGATCAGTGATATTTTATTATTTTGAACCCAAA  
CTTCTTTTTCTTTGATTCGATTTTTCTGAGTGTCTCCCAAAAAAATCAGGAGGTAAA  
AGTTCTCGTGCATCAACTCCCACCTTTTAATTATTTTTAAT  
TCTTTGTGGTACTGAAGTTGTTTTGTTATAACTTTTTACAGTTTACAATTTACAATCCAG  
TAATTAATATTGTTGGTGTAAATATTTTTGTTTCGTGGTT  
TGGTTTGGTTAAGGTACACGTCCTACCACGAGAGATGCTGGGAAAATCAACTTTTCGG  
GTTGTCCATGTGGTTGCTCAAGTGGTTACCCATGCGACTTGTG

GATCGATTCTTGCTAATGGTGTGCATGGCTTCTGCTTGGTGACACTTCTCATTGGGAT  
TGGATAGGCCTCGTTTGGGTCCCTTAGAACTCAAAAACCTTT  
CAGGAAAACCCCTGTGCTAGATGTGGGTACCCTTGCCAAGATTAAAGGTGGAGACA  
TTAAGGTAATAATCCCCCTTGCCTTTTTATCAAATCAATTC  
ATCTTTCTTTTTAATCTCAACAAAGATATTATTTTCATTTGATCAACAAATCTTAATTTA  
TTAGTTTTGTTAGAAATTCAGTCAAGAATTTGAACCC  
ATGACCTTTCTTTCTTTTTCTTCCCTCCATTTTTTAACCACTAAACAAATCTTATATTTTT  
TATCTTATTTTTCACTTACAACATGCTTTTTTCATTCTAA  
ATGGTGCTACCTAATTTTTCTTTTGCTTTTTCATCAAGTGCCACATTAATACTAATTTT  
CAATCCCCCTCCTTTTTATATTTAATGAAATGACCCCCCT  
TATTGTGTTCCCTTCTCTTTTTTTTTCCCTTAGATTTTGATTTTCCATCATTGTGCGT  
TTTCAATCAAATTGTGGGCGGAAAGCACAAAGATTTAGAGT  
ATTTTTGGTTTGTAAATAATAAAAAATATCCGAAAGCTAGTCGACAAAAGACGTTGAG  
TAATCACTAATCATTGTTTTGATCACGTTTGGTGGGGTTAA  
TTATTTCCCTTAGATTGGTTTGTGAAATCAACGCACAAATGAAAATCTGAGTGTGTC  
AAACTCAAATTTTGATGTAGGTACGTCCAGCCATTAAGCGA  
CTTAAACGTCACTGTGGAATTCGTGGATGGAAGGACAGAGAATTATGATGCAATCA  
TATTGGCAACTGGTTACAAAAGCAATGTGCCCTATTGGCTTA  
AGGTGTGACACAAGACACTTACCCGTTCTTCTTAAATTTAAATTCATATACTATTAA  
ATACAACAAGTTAGTAAACTTTAGCAAAATTATTTTTTTGA  
ATGACTTTGAATTCTGAAATTGGTACTATAAAGCAAAAAAATATTAATACACTTAAGTGG  
TTGGAAAATTGTGTAGGAAGAAGATATGTTCTCTAAGAAA  
GATGGGTACCCTAGGAGGCCATTTCCAAATGGGAGGAAAGGTAGAAATGGGCTCTAT  
GCGGTTGGTTTTACCAAAAAGGGTCTACTAGGTGCGTCCATGG  
ATGCAAAGAGAATAGCCGAAGACATTGAACAGTGTTGGGAAACTGGGGCAAATCATA  
GAACTACTCTTGCTCCTTCACACTTGCCGCAACCAAATTCATA  
ATTTAATAGTATTAATTTGGTTTTGGCTAAGTGTAACACACTACGAGAAAGGGTTCAT  
CAAAGAAAGATATTGGAAGGAAGGGAGAAAAAAATCATA  
ATTGATGTTTGGGTTTGGCCAAGGGGCAAAAGAGAAGAGAGATTTATTCAAGTTGGT  
ACATAAATGGAATGGAGACTTTTTGGTGGTATTACGCTATCAT  
ACGTGTTCAATGCTAGTACCAAATGATGCTCCTCCAATATCCATGCATGGGGTGAAG  
TGGGCAAAGCGAAAGAAACATGAGGAAGAATTTACTTTGAT  
GCCCTTCAGCTTAATTTTGATGGAATCTTCGGTCATGGGGTTGGGAAGATATTGAATT  
GAAGTTGAAGGAAAGAAAGATGGTGGATTTTTGCTGGGGCGG  
GGGACCTAGCTTAGGTCCTTGGTTTTATGTACTTCTTGACGTTGCATTTTTTATTTT  
ATTTTTGGCCTAAGTAGGTTGACTTACAAGAGAGAGAGTG  
TGAAAGAGAAACAGAATTAAGAGGACATGTTTCAAGTTAACCTATATTTCTTCTTTT  
TTCCCTTTTTCTAGAAATAGAGTATAACATTTTTTATGTT  
TTTTTGGTTGCATGTTTGGCTCTATGAATGCTTAAGTCGTTTGGCTTGGGGTTATCTTT  
CTTATTTTGAATCAAATTCGGAGAAAAAACCAAAGTT  
AATTAATGAGAAGGGGGAAAAACTTATAGCTTGGGATGAAGTGTTAGATTGTGTACC  
ATTTTCATTACCACTTCCATGCAATTTCAATTGTGCGAAATGAT  
TTCATTACAAGTAGGAATGAGGACCACTCCCTCTATTTCAGCAGAGAAGCTTGAGAATG  
TGCGTTTAAAACAGCCAGAAGCAATTAATTTTCAGGGAATTG

CAGTATATTTGTAATCACATTTATTACCTACTCACCAACTTCATTAAATTGGCACCACCA  
TGAGAGTTCAAGCAACGGGAA

>AtYUC7(At2g33230)

ATGTGTAATAACAATAACACAAGTTGTGTCAACATCTCAAGTATGCTTCAGCCTGAGG  
ACATTTTCTCCCGTCGTTGCATCTGGGTGAATGGGCCTGTCA  
TCGTCGGTGCTGGCCCATCAGGCCTAGCTGTGCGCCGCCGACCTGAAACGCCAAGA  
AGTTCCGTTTGTAAATCCTCGAGCGAGCTAACTGCATAGCTTCTCT  
GTGGCAAACAGAACCTATGATCGTCTCAAGCTTCATCTCCCAAAGCAATTCTGTCAA  
TTACCCAATTTACCCTTCCCCGAGGATATCCCGGAGTATCCA  
ACGAAGTACCAGTTTATTGAGTACCTTGAGTCTACGCTACCCACTTTGATCTCCGCC  
CCAAGTTCAATGAGACGGTCCAATCAGCTAAATATGACAAGA  
GGTTTGGGCTGTGGCGGGTCCAGACTGTTTTGAGAAGCGAGCTGCTCGGTTATTGT  
GAGTTCGAGTATATATGCAGGTGGCTCGTGGTGGCGACGGGAGA  
GAATGCTGAGAAAGTGGTGCCGGAGTTTGAAGGTTTAGAAGATTTTGGTGGTATGT  
TCTTCACGCTGGAGATTATAAATCCGGCGAGAGGTACCGCGGA  
AAACGAGTTCTCGTAGTTGGATGTGGAACTCAGGCATGGAAGTCTCTCTTGATCTAT  
GCAATCATGATGCGAGCCCATCAATGGTTCGTTTGAAGCTCCG  
TAAGTAAAATTCAGTAAATTATACCACCAAGTTACGAAAAACAGAGCACCCCTGATTCT  
TAGTAGCTCCTCTGTTTAAAACAGAGCATCTGATAGTTATA  
CTCTGTTTTTTCCTTGTTTCGATCAGGTTTCATGTATTACCGAGAGAAGTTCTTGGGAAGT  
CGACGTTTCGAGTTAAGTGTAACAATGATGAAATGGATGCCGG  
TTTGGCTCGTGGACAAGACTCTTCTCGTTCTCACAAGGTTACTTCTAGGGAACACCG  
ATAAGTATGGGCTCAAGAGGCCTGAAATTGGACCGTTAGAGCT  
GAAGAACACCGCAGGTAAAACCTCCCGTGCTAGACATCGGAGCCATTTCAATGATCAA  
ATCAGGAAAGATCAAAATCGTAGCGGGAATAGCTAAGTTTGGT  
CCGGGAAAGGTGCAACTCGTGGATGGTTCGAGTTCTGCAGATTGATTCAGTGATTCTT  
GCCACTGGTTACAGAAGCAATGTCCCTTCATGGCTTAAGGTAG  
ACAAAAGTATTATCTTTTTTCAGATTTTTGTCTCAAAGATAACATTTTATAGGACCATAG  
AATACCGGTATTGATAGTTATGGGAAGTTTGATAAAAACCT  
AAGACGTTGATTGGTGATTGATTTATTGTTATGCAGGAAAACGACTTGGGTGAGATTG  
GGATAGAGAAAAACCCATTTCCAAAAGGGTGGAAAGGGAAGG  
CTGGATTGTATGCGGTGGGATTCACCGGAAGAGGACTCTCAGGTGCATCGTTTCGAT  
GCAATGAGTGTAGCTCATGACATTGCCAATAGCTGGAAAGAAGA  
AACTAAGCAACAGATCAAAACTGTCGCTACTCGCCACCGTCGTTGTATTTCACACTTT  
TGA

>Glyma.20G080000

ATATCTCACCTCATTCTCTCTCTCTCTCCATCTTCAACAAAAGTCAATCCCTCACC  
CTCTTTACCTTCAAAGTTCAAATCACTTAACATAACATTG  
GTTTCATATTAGCCACAACACAGCCCTCTAATACATCAAACCTTTGTCATCATCACAAACC  
AAGAAAAAAGAAAAGAAAATGCATGACATATGTCTGAACAT  
GCCACCAATGGTTCAAACCTTCGACCCAGAGGACCTTTCACAAGGCGCTGCATATG  
GGTGAACGGACCCGTGATAGTAGGTGCTGGCCCTTCAGGTCTT  
GCAGTGGCAGCATGCCTCAAAGACCAAGGTGTTCCCTTCATAATCCTCGAGAGAGCA  
AACTGCATTGCCTCTCTCTGGCAAACCGCACCTACGATCGCC

TCAAGCTTCATCTCCCAAAACAGTTTTGCCAGCTACCAAACGTCCCTTTCCCTGAGG  
ACTTCCCTGAATACCCACAAAGTTTCAGTTCATAAGCTACCT  
TGAAAGCTATGCCAAGCACTTCAGCATAGCCCCACAGTTCAATGAAACAGTGCAGTC  
TGCAAAGTACGATGAGACCTTTGGCCTGTGGAGGATCAAGACC  
ATCAGGAAGATCAAGAAATTAGGAGGACTCTCTTCAGGTGGTTGTGCTGAGTGTGAG  
GTTGAGTACATTTGCAGGTCGCTTGTGGTCGCCACCGGGGAAA  
ACTCGGAGAAAGTGGTGCCTGAGTTTGAAGGTTGGGAGAGTTTGGTGGCCATGTT  
ATGCATGCCTGTGATTATAAATCTGGGGAAGTTATGGTGGACA  
AAAAGTGCTTGTGTTGGGTGTGGAAATTCAGGCATGGAGGTCTCACTTGATCTTTG  
TAACCACAATGCTAACCATCATTGGTTGTTAGAAGCTCAGTG  
AGTACTGAAAATCTTACTTAATTAGCATTCTTATATAACAAAACCTTAGATGCAGTTCT  
ATAGCGGTTTCTGGTGCTACTGTTCTTCAATCAGAATTAG  
AGTTTTATTTTGGTAATCTATGTTGACATTTAATGAAAACTTTTATTGTCCGAATTACTGA  
TCTGAAACTCTAATTCTGAATAGAAAGTAACACCAAAAAG  
CATGCATATAAGTTTTGTCCTTTTTATATGTAAATTTTTTTTTATCTAACATTTTTTTGTGT  
TTATGATCAGGTTTCATGTGTTGCCAAGAGAAGTTTTTTG  
GGAAATCTACCTTTGAGCTTGCTGTGACGTTGATGAAACGGTTTCCTCTTTGGATAGT  
TGATAAGATATTGCTGATTCTGGCACGTTTGATTTTGGGGAA  
TGTTGAAAAGTATGGTCTCAAAGGCCCTCAGTGGGTCCTTTGGAACCAAGCACAC  
TGCAGGGAAGACCCCTGTGTTGGACATTGGGGCCCTTGAGAAA  
ATTAGATCTGGCAAATCAAAGTGGTTCCTGGAATCAGAAGTTCTTGCCAGGGAAA  
GTTGAACTTGTTGATGGCCAAGTTCTTCAGATTGATTCTGTAG  
TTCTTGCCACTGGGTATCACAGCAATGTACCATCATGGTTGAAGGTTAGTCCTTCTTC  
ATAGTTTAATTATATTCATTAATTGACACTTTTTTTTTATATT  
GTTTCTTTTGCATTGGATTCTTGCTGACAGTTATGGAAGTGGATAGGGTTAACCCCTG  
CAGTTGTTCTCTTTCTCTCTCTCTCAATAAAATCAAAA  
CCATGTCAGATTATTAGTTTTGGCTGGTGGTTTTTTTTCTTTATTTTTAATAGTCCTAATAT  
AAGTATTCAACAGGTGTTTCTTCTACTATCCACTTGTGC  
TTTTTTTTTCTCCAAGTTTTTCTGTACTCTTACTGGCCCTTTAATGACCAGGGGAAG  
GTGTGTGTGTCTGCGTGTGAGGGGAAAAAATCATTTT  
ATTTTGAAAATGCTTCAAATTTATAGGCATCTATAATATGTGCTTGGTTGCTTGGTACAT  
TTTTAGATATTATAATGTTTCTCTCCTGGGGACAATAATT  
TTAATGTAGATAATAATGTGCAATTAGTGGAAGAGTTTTTTGACTTTGTTCAAGTTAAA  
TTATTGGCTCAATGCACAGAACTAAAATGCAATGTTATGT  
TTTGCATCAGGAGGATGATTTTTTTACCAATGATGGAACCTCCAAGAAACCCATTTCCA  
AATGGGTGGAGAGGCAAAGGTGGTCTTTATGCTGTTGGGTTT  
ACAAGGAGAGGCCTCTCCGGTGCATCTTTGGATGCAATTAATGTGGCTCATGACATT  
GTCAAGAGTTGGAAAGAGGAAACCAACAGAAGAGGAAAACAG  
TGGCTGCACGCCACAGGAGATGCATATCACACTTCTAATTAAGAGACTCATCACTTCG  
ATAATGACAAACATTTTGGGATTGTTTTTGTATTATTGCTGAT  
CAGTCCAAAACAAGAGATGGTGATGTTAGGTTACAAAATAGTAGTAGAAGTCCCTAAT  
ACAAAATAGAACCCTTGAGTCTCTCTAGTTGGTTAAGTTGTG  
GAGAAATGAATTGTAAGTGTGCAATCTCCACAGTAAGCTTTGTCCCTTTTCTATTTCA  
TACCTCTTAAGGTCTAAATATAAATCTATCTTTAGAAAGAA

AAAAAATTAGCCCTCTCCTTAAGGAAACCCATGTTTGAAAATAATTTAGCTATAAATTTG  
TACAAAGGATGATAAGGCTTATTTGCTTCTTTTTTTTCAT  
TGTAATTGTTTTTTGTTCTTTAGTTAGTTGTAAGGAATAT

>AtYUC8(At4g28720)

ACCATTTCCAATACAACCTTCCATTGATTCTCTCTCTCTCTCTCTACTAAAACCTTTCAA  
ATTCTCTTACTTTCAATACTTATTAAGAAACTTATAAAA  
AAAGAATGGAGAATATGTTTCGTTTGATGGATCAAGATCAGGATTTAACTAATAACCGG  
TGCATTTGGGTCAACGGACCGGTCATCGTCGGAGCTGGACC  
GTCGGGGTTAGCGACGGCGGCTTGTCTCCATGAACAAAACGTTCTTTTCGTTGTTCT  
CGAGAGAGCAGATTGTATTGCTTCTCTATGGCAAAAACGTACT  
TACGATCGTCTCAAGCTTCACCTTCCTAAGCAGTTTTGTCAATTACCGAAAATGCCCT  
TCCCTGAGGACTTCCCGGAGTACCCGACGAAGCGTCAGTTCA  
TCGACTACCTTGAGTCTTACGCTACCCGGTTCGAGATCAACCCTAAGTTCAACGAGT  
GTGTGCAGACTGCTCGGTTTCGATGAGACCAGTGGCTTGTGGCG  
AGTCAAGACCGTGTCTGAAGAGTGAGTCGACTCAGACCGAGGTCGAGTATATTTGCC  
GGTGGCTTGTGGTGGCTACGGGAGAAAATGCGGAGAGAGTGATG  
CCGGAGATTGATGGTCTTTCTGAGTTTTCCGGTGAGGTGATTCACGCTTGTGATTAC  
AAGTCCGGCGAGAAATTCGCCGGGAAAAAAGTTCTCGTCGTTG  
GTTGTGGAAACTCCGGCATGGAAGTTTCTCTTGACCTAGCAAACCATTTTCGCTAAGC  
CTCCATGGTTCGTGAGAAGCTCTCTTACGTCGATGCCGAGGGA  
AGTAATGGGTAAATCAACGTTTGAGCTTGCAATGAAGATGTTAAGATGGTTTCCTCTAT  
GGTTAGTCGACAAGATATTGTTGGTTTTAAGTTGGATGGTT  
CTTGGAACATCGAGAAATACGTTTTGAAACGACCAGAGATGGGTCCAATGGAGCTA  
AAAAGCGTGAAAGGCAAGACACCGGTGCTTGACATCGGAGCTA  
TAGAGAAGATCCGGTTAGGAAAGATCAACGTGGTTCCAGGGATCAAAGGTTTAACG  
GAAACAAAGTCGAACTTGTCAATGGAGAACAACCTAGACGTAGA  
CTCAGTTGTTCTAGCTACTGGTTACCGCAGCAACGTCCCATATTGGCTACAAGAGAAT  
GAGTTCTTTGCAAAGAATGGTTTTCCCAAAGACAGTAGCTGAC  
AACAAATGGTTGAAAGGAAGGACAGGATTGTATGCGGTTGGGTTTACGAGGAAAGG  
GCTCTCAGGTGCGTCAATGGACGCGGTTAAGATCGCACAAGACA  
TAGGCTCTGTTTGGCAACTTGAAACAAAACAACCCACGAAACGCTCAAGGGGTTCTC  
TTCGAAGGTGTATCTCTCAACAGTTCTAATTTTTAGGAAAAAA  
AAGATTAGAGTTTTAGGACAGAGATCACTGACAAAAGAGAAGAGCCCTCTCCTGAAG  
ACCCAAAGCGAATCAAAGGGTGTGTCGCTGTTTTTTTTGTTAC  
CTCCTCCACTTAGTGTTTTGGGCGTTTTGTGTAACAGAGGAAGATGTGGCCTTTTG  
TTTTCTACTTTTTTACAATCTTTTTTTTTACATACATTTTTAA  
CAATTATTTTTTGGGGGTGGGTTCTTTGATTTTTTTGTACAAGTTTATGTTAACATCTAT  
ATTGTATACACTTT

>Glyma.13G128800

TAAAAAAAACCAACTCTTACTTTTTTTTTCTCTCTCTGAACTTCCAAAACCTGCTTCTTTC  
AAACAATCTCTCTCAGCAAACCCCAAAGGCCAATTTAAACT  
CAGAAAACCAACACAAGAGAGAGTGAAAAATGGAGAAGTTGTTTCGCCTAGTTGACT  
ACGAGGACATGTTCTCAAACGTTGCATTTGGGTCAACGGACC  
CGTGATAGTAGGAGCTGGTCCTTCAGGGCTAGCCACAGCAGCATGCCTCAAACAAC

AAGGGGTACCCTTCATGGTTCTCGAAAGAGCAGAATGCATAGCT  
TCCCTGTGGCAAAAACGCACCTACGACAGATTAAGCTCCACCTTCCAAAACAGTTC  
TGCCAGCTCCCTAACCTTCCATTCCCCAAAGACTTCCCCGAAT  
ACCCACCAAGAAACACTTCATAGACTACCTCGAATCCTATGCTCAGAAATTCGAGAT  
CAACCCACGGTTCAACGAGTGTGTCCAGTGTGCTAGGTACGA  
TGAAACCAGCGGGCTGTGGCGGGTGAAGACCGTTGCCACGTGTGGCTCCGCCAAG  
AGCGAGTTCGAGTACATTTGCCGGTGGCTCGTGGTGGCCACCGGC  
GAGAATGCGGAGTGTGTGATCCCTGATATTGAAGGGCTTGGTGAATTCAAAGGTGAT  
GTTATTCATGCCTGCGAGTACAAGTCTGGAGAAAGCTTCAAAG  
GGAAGAAAGTGGTTGTTGTTGGTTGTGGCAACTCTGGCATGGAGCTCTCACTTGACT  
TGTGTAACCACAATGCTTCTCCTTCCATGGTTGTTTCGTAGCTC  
GGTAAGTTTCTTCTCTTTTCTTGTAAAGGATCTGACTCCTCTAGAGTGAGCAAATCGATA  
CATAAGAAAGCAATCATCAGCGACGACTGAGACTACTTACT  
TTACACCAGCTTACTCCAGAGGAGTAGACTTTTGGACAAAACCTTAGATACAGTACTTT  
TTTTAAGTGTCTGAGGATGTTGTCCAATTAGAATTGGAGT  
TTTACCTTGTTATGCGTATCGTCTAGGTGAAACTTCAATTATAATAAGAAAGCATAGCCA  
GAAACACTTAACTGCTTATAAGTTTTTTTTCTACATTTT  
TTTTTAATGTTTTCAATATAAAGAGAGAGGGGAATTTTGAGGGTGGTGATTAAATGGG  
GTTGTTCTGTTTTGATTTGGCAGGTTTCATGTGTTGCCTAGG  
GAGGTGTTTGGGAAGTCAACGTTTCAATTGGCGGTTTTGATGCTGCAATGGTTGCCA  
CTTTGGTTGGTTGACAAGATTCTATTGGTGTGACATGGTTGG  
TGCTGGGTAACATGGAGAGATTCGGGCTCAAAGGCCTTCAGAGGGTCCATTGTTG  
CTGAAGAACACAAAGGGGAAGACCCCTGTGTTGGACATTGGTAC  
CTTGAGAAAATTAGATCCGGTGACATTAAGTTGTGCCAGAGATTAAGAGGTTTCAGC  
AATGGCTACGTTGAGTTTGTAAATGGTGAAAAGCAAGGAGTT  
GATGCAGTTGTGCTTGCAACCGGGTACCGCAGCAACGTCCCTTCTTGGCTTCAGGT  
GAGAAATTGTTACTTTCTATTCTTACAAGAAAGAAAAGTGTCCA  
ATGTCTATTGTCTAGTCACTAGTGTCAATAGAAAAGAGATTTTTTTTTGTTTTGTTTTGTG  
ATCATTATTATTATATATTTATATTCATGGCTATAGAAGA  
TTGTCAGTCATGAAAACCTTTTTGGGGTAGATTTTTTTTTGTCTTTTTTCCAACCCCAA  
TATATTTTTTTAGAAGCTTCTTTGTTTTGGACCCTTTTTGA  
ATAGTAACTAGTATTTTATTTTATTGATTTTTTTGTTAATGGGGCAGCAAATAATGTGA  
TTGTGGTTATGTTATGTGCAGGAAGGTGAATTTTTCTCC  
AAGAATGGTTTCCCAAAATCTCCATTTCTAATGGTTGGAAGGGAAATGCTGGACTTT  
ATGCAGTTGGGTTCAACAAGGAGAGGGCTCTCAGGTGCCTCAT  
CTGATGCTATGAATATTGCTCAAGATATTGACCAAGTTTGGAAACAAGAGACTAGGCA  
AAAGAAACAACGCACCACTGCTTGTATAGACGTTGCATTTT  
CCAGTTCTGAATCACTCTAACTCAAATCAAATACAACACTACATAACAAGCAGTGATGTTT  
CTTTTGTATAGGAATTTGTTGGTGTATAAACAAAATAACA  
ATATCTTTTGTAAAGAACAGAAAAGAAAAGAAATATACACGAATAACAAAGAGCAGA  
GCAACATAGGCCATAGCCCTCTCCCATGGCCCAAGTTTTTG  
ACTTTTTTTGGGCCTTATTTCTTTAGGAAACCAAGGATGATGAGGCTTTTCAGTTTTTA  
CGATTTGTTTTCTATATTCGTACGGCTTATACATGTAACC  
ATATTCATTGATCAAGTTAAATAACAATTTGAATTT

>Glyma.10G041800

CTCAAAAAACCAACTCTTTCTCTCTCTCTCTCAACTTCCAAAACCTGCTTCTTTCAA  
ACAATCTTTCTCAGCAAACCCAAAAGGCCAATTAACCTCAG  
AAAAACAAGTGGGAAAATGGAGAACTTGTTTCGCCTAGTTGACTATGAGGACATGTT  
CTCAAAACGTTGCATTTGGGTGAACGGTCCAGTTATAGTAGGA  
GCAGGTCCTTCAGGGCTAGCCACAGCAGCATGCCTGAAACAACAAGGGGTACCCTT  
CATGGTTCTCGAAAGAGCAGAATGCATAGCTTCCCTATGGCAA  
AACGCGCCTACGACAGATTAAACTCCACCTTCCAAAACAGTTCTGCCAGCTCCCTA  
ACCTTCCATTCCCCAAAGACTTCCCCGAATACCCCAACCAAGAA  
ACACTTCATAGACTACCTCGAATCCTATGCTCAAAAATTTCGAGATCAACCCACGTTTC  
AACGAGTGTGTCCAGTGTGCTAGGTACGATGAGACCAGCGGG  
CTGTGGAGGGTGAAGACCGTTGCCACGTGTGGCGCCGCGAAGAGCGAGTTTGAGT  
ACATTTGCCGGTGGCTCGTGGTGGCCACCGGCGAGAATGCCGAGT  
GTGTGATCCCTGAGATTGAAGGGCTTGGTGAATTCAAAGGTGATGTTATCCATGCCT  
GTGAGTACAAGTCTGGAGAAAGCTTCAAGGGGAAGAAAGTAGT  
TGTTGTTGGTTGTGGCAACTCTGGCATGGAGCTCTCGCTTGACTTGTGTAACCACAA  
TGCTTCTCCTTCCATGGTTGTTCTGTAGCTCGGTAAGTTTCTAA  
CATGTTTCTTTCTTTTCTTTTTCATATAAAGATCTGAATCCTCTGTAGTGAGCAGATGACT  
TACTTTGAAGTGTTTTTGGTGTGTTTTTCTAATCAGAAT  
TGAAGTTTCACCTTATTATGCGTGCATCGAGTGAAACTTCAATTCTGATAGGAAAGTA  
TAGTCAGAAACACTTAAGTCTTATAAGTTTTTTTCTACA  
TTTTTTAATGTTTTAATATTAGAGAGAGAGAGAGAGAGAGGAATTTTGAGGGTGGT  
GATTAATGGTGTGTTCTGTTTTTGGTTGGACAGGTTTCATG  
TGTTGCCTAGAGAGGTGTTTGGGAAGTCAACGTTTCAATTGGCGGTTTTGATGCTGC  
AATGGGTGCCACTTTGGTTGTTGACAAGATTCTATTGGTGT  
GGCATGGTTGGTGTGGGTAACATGGAGAGATTCGGGCTCAAAGGCCTTCGGAGG  
GTCCATTGTTGCTGAAGAACACAAAGGGGAAGACCCCTGTTTTG  
GACATTGGTACCTTGGAGAAAATTAGATCCGGTGATATCAAAGTTGTGCCAGAGATTA  
AGAGGTTACCAATGGCTGCGTTGAGTTTGTTAATGGTGAAA  
AGCAACATGTTGATGCAGTTGTGCTTGCAACCGGGTACCGTAGCAATGTCCCTTCTT  
GGCTTCAGGTGAGAAATTGTTTCTACTTTCTATTCTTACAAAG  
AAAGAAAAGTGTCCAATGTCTATTGTCTAGTCACTAGTGTCAATAGAAAATAGATTTTT  
TTGTCTTATGATCATTACTATTATATATTTATATTCATGGC  
TATAGAAGATTATCAGTCATGAAAACTTTTTGGGGCAGATTTGTTTTGTCCTTTTTTCC  
AACCCCAATATATTTTTTTAGAAGCTTCTTTGTTTTGGACC  
CTTTTTGAATAGTAACTGGTAGTATTTTATTTTATTTTATTTTTTGGTTAATGGGGCAGCA  
AAATAATGTGATTTTTGGTTATGTTATATGCAGGAAGGTG  
AATTTTTCTCAAAAATGGATTCCCAAAATCTCCATTCCCTAATGGTTGGAAAGGAAAT  
GGTGGACTCTATGCTGTTGGGTTTACAAGGAGAGGGCTCTC  
TGGTGCCTCATCTGATGCTATGAAAATTGCTCAGGATATTGGCCAAGTTTGAAACAA  
GAGACTAGGCAAAGAAACAACGCACCAATGCTTGTATAGA  
CGTTGCATTTCTCAGTTCTAAATCACTCTAACTCTAAATCACATACAACAATATACAAGC  
AGTGCTGTTTCTTTTAGCTAGGAATTTGTTGGTGTATAAA  
CAAAGTAACAATATCTTTTGTAAAGTACAGAAAACAAAATGAAAATACACGAATAAC



GAATAGCAGAGAAATATAGGCCATAGCCCTCTCCCATGGCC  
CAAGTTTTTACTTGTTTTTTGGGCCTTTTTCTTTAGGAAACCAAGGATGATGAGGCT  
TTTTATTGTTTAGGATTCGTTTTCTATATTCATACGGCTTA  
TACATGTAACCATATTTGTTGATCAAGTTAAATGAC

>AtYUC9(At1g04180)

ATGGAGAATATGTTTAGACTCATGGCAAGTGAAGAATATTTCTCAGAGCGGCGATGTG  
TTTGGGTCAACGGTCCGGTTATCGTAGGAGCTGGTCCATCCG  
GTTTAGCTACAGCAGCTTGTCTACATGATCAAGGAGTCCCATTCGTTGTGGTCGAGA  
GATCAGATTGCATAGCGTCACTGTGGCAAAAACGAACCTACGA  
TAGGCTCAAGCTTCACTTGCCCAAGAAATTCTGCCAATTACCGAAAATGCCCTTCCC  
GGATCACTACCCTGAATACCCAACGAAACGACAGTTCATCGAT  
TACCTTGAGTCATACGCAAACCGGTTTCGATATTAACCGGAGTTTAATAAAAGCGTTG  
AGTCTGCTCGGTTTGATGAAACTAGCGGGCTATGGAGGGTTA  
GAACAACCTCAGACGGAGAGGAGATGGAATATATTTGCCGGTGGTTGGTGGTGGCG  
ACGGGAGAAAACGCCGAACGTGTTGTCCCAGAGATTAATGGTCT  
TATGACGGAGTTTGACGGAGAAGTGATTCACGCTTGTGAGTATAAGTCCGGCGAGAA  
ATTCAGAGGAAAGAGAGTTCCTTGTCTCGGATGTGGAAACTCA  
GGCATGGAAGTCTCTCTTGATCTTGCTAACCAATGCAATTACTTCCATGGTCGTTA  
GAAGCTCGGTAAGCAAAACAAAACACTGATAATTCTGTTTTTAA  
ACAAAGCATAACTTTTGTATGAAACTTTATAGCTAATAGTGTTCTTGTGTTTTTTAATTC  
GACCAGGTTTCATGTTTTACCGAGGGAGATTATGGGGAAAT  
CAACATTTGGAATCTCAGTGATGATGATGAAGTGGCTACCTTTATGGCTCGTAGACAA  
GCTTCTGCTTATCTTATCGTGGTTGGTTCTAGGGAGCTTATC  
AAACTATGGGCTTAAAAGGCCTGACATCGGCCCAATGGAGCTTAAAAGCATGACAGG  
AAAGACGCCGGTTCTTGACATCGGTGCTCTGGAGAAGATAAAA  
TCCGGCGACGTAGAAATTGTACCTGCAATCAAACAGTTCTCGCGTCACCACGTGGAG  
CTCGTAGATGGTCAGAAGCTAGATATCGACGCTGTGGTTCTCG  
CCACCGGTTATCGTAGCAACGTCCCTTCTGGCTTCAGGAAAGTGAGTTCTTTTCGA  
AAAATGGGTTTCCGAAATCGCCGTTTCCAAACGCGTGGAAGG  
GAAATCGGGATTATACGCGGCCGGATTACAGAGAAAAGGGTTGGCTGGAGCATCAG  
TAGACGCCGTTAACATCGCTCAAGACATTGGAAATGTGTGGAGA  
GAAGAGACCAAACGACAGAAGATGAGAAGAAATGTGGGTCACCGAAGATGCATCTC  
AGTTGCTTAA

>Glyma.03G169600

ACATTCTATTTCCAAACCCAGTAAAGCTTCTTCAAACAAAGAAAACCACTTTCAAAA  
GGCACAATTCTTACTTTCTCAAACCCAAACCAAACCAAACC  
GAACCGGAAAAAATAACATCATTGAGAACTTGTTCGCCTAGTAGACAA  
CGAAGACTTGTCTCTCGCCGTTGCATTTGGGTGAATGGCCC  
TATAATCGTAGGGGCAGGACCCTCAGGGCTAGCCACAGCAGCATGCCTTAGAGAACA  
AGGGGTACCCTTCATGGTTCTCGAACGTGCAGATTGCATAGCC  
TCACTGTGGCAAAAAGAACCTACGACAGGCTCAAACCTCACCTTCCAAAACAATTC  
TGCCAGCTCCCGAAACTACCCTTCCCTGAAGACTTCCCCGAAT  
ACCCACAAAGAAACAGTTCATAGAGTACTTAGAATCCTACGCTAAGCACTTCGAGAT  
CAACCTCAGTTC AACGAGTGTGTGCAGTCCGCGAGGTACGA

CGAGACAAGCGGCTTGTGGAGGGTTAAGACCGTTTCATCCTCGAGTGGCGCGGCTC  
GCGGCGAGGTTGAGTACATTTGCAGGTGGCTCGTGGTGGCCACC  
GGGAGAATGCGGAGTGTGTTATGCCTGAGATTGAAGGGTTGAGTGAGTTCAAAGG  
TGATGTGATCCATGCTTGTGATTACAAGTCAGGGGAGAGATTCA  
GGGAAAGAAGGTTCTTGTGTTGGATGTGGCAATTCCGGCATGGAACCTCACTTG  
ACCTTTGCAACCACCATTCTTCTCCGTCATGGTTGTTCTAG  
CTCGGTAAGTTAATTGTCATACACTGTCAGCATAAAAAAATATTGCACTACCAATCA  
ATCAAAAATCATCCATTAGATGACTTTTTAAAGTAGTTATTA  
TAAAAGTCAAGAAAATTTTCTATATGGAGGAACTGTGATTGAATGATAGTTAATTTATA  
TTCACAATCAATCAGAAATCGTCCATCTGATGACTTTTTAA  
AGTAACAAGACTTTTTAAAGTGGTTACTTTAAAAGTCAAGAAATGGATGGATGATCTGT  
GATTTGATGACAATTGTTTCTTTGTCAAAGAAAGAAATATAT  
GTTTTGAGGATGGAATCTAACAGGGGTGTTCTGTTTTTGGATACAGGTTACGTTG  
CCTAGAGAAGTGTGTTGGAATATCAACTTTTGAATTGGCGGTT  
ATGTTGCTGCAATGGCTGCCCTTTGGCTTGTGACAAGATTCTCTTGATCTTGGCAT  
GTTTTGTTTTGGGGAACATTGAGAAGTTGGGGCTCAAAGGC  
CTTCAAAGGGTCTTTTGGAGATGAAGAACAGAAAGGGGAAGACCCAGTTTTGGATA  
TTGGTGCCTTGGAGAGGATTAGATCCGGTGACATAGAAGTGGT  
GCCAGGAATCAAGAGGTTCAATAATGGTGAAGTTGAGTTTATTAATGGTGAAAAGCTT  
GATATTGATGCAATAGTGCTTGCAACCGGTTACCGCAGCAAT  
GTCCCTTCTTGGCTTCAGGTGAGAATATGTTCTAGATCGCTTGTTTTTTTTAAAATAGA  
AAAAAAGGGATTTTTATTTTTGTTTTTCTAATATTTTCACC  
ACAGAAGATTGTCAGTTCAGAAAGCCTTTTGGAGGCAGATTGGTTTTGTTTTGTCCTTT  
TTAACTTTTTGGGTGGGGGATGTTTTAGAAGCTTCTTAATTA  
TCTCTGAAATTTAATAGTGAACATAATGTTGTTTTGGTTATGTTATGTGCAGGAAGGTGA  
ATTTTTCTCAAAGAATGGATACCCAAAGATGCCATTCCCTC  
ATGGTTGGAAGGGAAATGCTGGACTTTATGCTGTGGGGTTCACAAAGAGAGGGCTC  
TCTGGTGCTTCTTCTGATGCTGTGAAAATTGCTCAAGATATTGG  
CCAAGTTTGGAAAATGAGACTAAGCAAAGAAACAGCGCACTACTGCTTGTCTAG  
ACGTTGCATTTACAGTTCTAAATTGTTTCTAAAACAAAAGGA  
CTTGACATCACATACATGACCACTAGCTAGTGCTGCTTTAATTTAATTTCTTTAGTCTCA  
GGAATTTTTGTTTTGTATAAACAAAATAACAATATCTTGT  
AAAAAAACACACACACCGAAAGAAAAAATAGCACACAGATAGAGCCCTCTCCGA  
TGACCAAGGTTTTTATATGGTTGGTCGTTTTTTTTTAAGAAAA  
AAAAACGAAGGATGATGAGGCTTTTTCTTACTTTAATTTTCAATTTTCCCCC  
TATGTTTCAATGTAACCTTACAAATAAATATGTAACAAGTACAG  
TACGTAATCAATGATCAAGTTCAAT

>AtYUC10(At1g48910)

ATGGAGACCGTAGTGGTATTGTGGGAGCTGGACCGGCCGTTTAGCAACATCGGT  
TTGTCTAAACCAACTCAATCCCAAACGTGATCCTCGAGAAAG  
AAGACATCTATGCATCCCTTTGGAAGAAACGAGCGTACGATCGTCTCAAACCTCACTT  
AGCCAAAGAATTTGCCAGCTTCTTTTATGCCACACGGTCCG  
TGAGGTTCCAACCTTTATGTCCAAAGAGCTTTTCGTCAACTACCTTGACGCTTACGTT  
GCCCCGTTTCGACATCAACCCTAGGTACAACCGTACCGTGAAG

TCCTCAACGTTTCGATGAGTCCAATAACAAGTGGAGGGTCGTGGCCGAAAACACGGT  
AACCGGAGAAACCGAGGTGTATTGGTTCGGAGTTTCTGGTGGTTG  
CGACCGGGGAGAACGGAGATGGGAATATTCCGATGGTGGAGGGGATTGACACTTTT  
GGGGGAGAGATTATGCACTCGAGTGAGTACAAGTCCGGTTCGTGA  
TTTTAAAGATAAAAATGTTCTTGTGGTTCGGAGGTGGAAATCCGGTATGGAGATTAGT  
TTTGATCTTTGCAACTTCGGAGCTAATACGACCATTCTAATT  
AGAACTCCAGTAAGTAATTAATGTTGTTTTGTCTCTTTTAATTATTATAATTTGTCTGCAT  
GAAAGCTTAAGATGCACACTTGTCTTGCATGTGTGATTT  
TTTTCTCCGTTGTACACAATTACTAAGACGTCCCTAAGGCCTTAACAATAACTGATCTT  
TGGTCAATTCATGGATACAACTCATTGTGATTTATGAGAT  
CCAAAAGATAGATGATGGCTTGGCTTGAAAATATCAATTGGCACCCATATCCTTCATT  
GAGTTCTAATGTAATCTAAAATTTTCATTCCATAACCATAT  
GTAGATGGTGTGTGTATATACATTAGGGTTTTCTTTTGTAGAAAATAACACATCAAATAA  
TGTTCTTTCTCTAAATCTGTGCAGAGACACGTGGTACTA  
AAGAAGTGATACACTTGGGGATGACACTTCTGAAGTATGCTCCAGTGGCGATGGTTCG  
ACACATTGGTGACGACTATGGCAAAAATTTGTACGGAGATCT  
CTCCAAGTACGGACTCTTCCGACCAAACAAGGTCCCTTCGCCACCAAACCTCTTTAC  
CGGAAAAGCTCCTGTCAATTGATGTTGGAAGTGTGAGAAAGATT  
CGCGATGGCGAGATTCAGGTACCTTCACTTGTCCATCAAATTCATCTTCATCTTTATT  
TTATTTTTTAAAGGATTTTTATTGGTTTTCTACTAATGTAT  
AAAAGTGTGCGTCTATTTTTCTGTTTTGTGGTCAAACAGTGTGAGTCTTTTAAATTTTG  
GTTTATATGAAAAGGATAAGCAATTAAGTATAAACAGTTG  
TAAAGGAGGATAACGTTAGTAATTTCTGCACGACTCCAAAATAACCCTTGATTTTAGAT  
GTTTCAAACCTCAATTTTTTTTTTCATATATCCTACTGATTT  
CACACAAATTAATGAAGATATAACCTCATAAGCATTATTGTTCAAAGCTTCTTGAGGA  
CTTAGTTAAATGATAAGTGGTAACTTCGATTAATGGAAAC  
ACTATTAACCTAATAATGCAATGTTAGGTTATCAATGGTGGGATTGGAAGCATCAA  
CGGGAAGACCTTGACGTTGAAAACGGACATAAACAAGATT  
TCGATGCGATTGTGTTTGCTACTGGTTACAAAAGCTCCGTTTGCAATTGGTTAGAGGT  
ATTTTAAACATGAGTACCCTATTGGACAACGATATATGTTAAG  
TATAGATTTGATCTTATCAAGTGAAAATGAAATCCTAACGAGTAACGAGACTAGGAAAT  
ACTCTTGTGCATAAATACTTGTATAATGATGTGTTTTTTGTG  
ATATTACAGGACTATGAATACGTGATGAAGAAGGATGGATTCCCCAAAGCACCGAT  
GCCAAAACATTGGAAAGGAGAGAAGAATCTTTACTGTGCCGG  
ATTTTCAAGAAAAGGAATCGCCGGAGGTGCTGAGGATGCTATGTCTGTAGCCGACGA  
CATCAGATCTATCTTGGCTACCTTAAAAAATAATTGA

>Glyma.04G213600

ATGGAGGAAGTATCAGTGATAATCGTAGGTGCAGGTCCTTCTGGACTTGCAATTTCTG  
CATGCCTATCACAAAACCTTTATCTCTCACATAATACTCGAGA  
AAGAGGATTGCAGTGCCTCTCTTTGGAGGAAAACGCTTATGATAGATTAAAGCTCCA  
TCTTGCTAGCGAGTTTTGTGTTTTGCCTCTCATGCCTCACCC  
ACCCTCAGCCCCAACTTACCTATCCAAAGATGAATTTGTTCAATACATTGACTCGTACA  
TTGCATGTTTCAACATAAACCTCTCTATTGTCGTATGGTT  
GAGTTTGCTGCGTATGATGAAGTTGAAAACAAGTGGAGGGTTCGAAGCGAAGAAGAC

TCTTGAGGGCACAAGTGAACTTATGTGGCTAAGTTTCTTGTGA  
TTGCCACGGGTGAAAATAGTGAAGGGTATATTCCTGATGTGCCTGGACTAGAAAGCT  
TTGAAGGAGAGATAGTGCCTCCAAATACTACAAATCGGGTTC  
AAAATATGAAACCAAAGAAGTTTTGGTAGTTGGGTGTGGTAACTCTGGGATGGAGATT  
GCTTATGATCTCAATGACTGGGGTGCAAACACTTCTATTCTC  
ATCCGAAATCCGGTAATAATTTTTTCATCCACTATCTGTGTTGGGATATTATCTATCATT  
TGTGTCATTAACCAAACATAAAATCGGTTAAACAATCTC  
ATCTTATGTGCCTCAATAAAATTAGAATACTATTAATAGTAGAACCCACTTGTTTAAA  
TTTTTTCATACACAAAATTATGAGTAATTATATATTTCT  
TCCATTATTTTTATTAATTTTAAATTTTACCCACTTTTTCAGATTTGATTTTTTTTTTTGCA  
ATTTTTTCTACACCATCTCTTTAAGAAAATATTGATA  
TCTGATTTTGCAATATTGACTAAATTATTTTTTTTGAATGCTAGAGTGCAATTCGAATT  
ATATTTTGTTTTTGTTCTTCTGGGAATGTTTTTCCATGAT  
TAAAGGATGGTGTGTGCTACTTGACAGTGGATAAATCTAAAAGAAGACTTGCCTTTC  
CTGTTTCCATGCTGGTACAATGACCAAAGATTATGCATTGGT  
TAAATTGTGGGATTTCCGGGTTGCAGATTAGGGGGATTCAAAAATCATGCATGATTGA  
GATTTTTTTGGAAGAAAATCATGATTGAGATTTTGATCATG  
CAATACATGGGATAATTTGTTTCATTATGATGGGATGTGTGTAGCTATTGGAGGAGACA  
TGCAGACATGTTTTCAATTGGGTCCGTGTGTATTATGCAGT  
ATAGATTGGGTGTGAGAAATTATGCAGGGAATGCATTATTATTTTTGCACTTATTGTCAA  
GTGGTGAAGGATTTTCATGCTAGAGAAATATGTAGTTAGT  
AAAAATAATAGGAATAATATATAATTAGTCAAAGATTTATGTAAGAAAAAACTTAAAAAA  
GGGTCTAACTCATAATACAATGGTTTTAATTTATTGGA  
TCACTTAGGATGAGATTATTTAATCCATTTCTACTTGGGTAACTAGACCACCCCATAT  
TTATATATAAGTTTGTAGTTTGTAGACCATGTTTTAATTT  
TTTTGGATATTGTTTTGTGCCATATATAGTTTTTCCTTTTTCTTTTAGTAAAAGGATTGG  
TTTATTTAAATTTCAAAGAAGAAAATGATTTTTGTGA  
TTGAATTAAGGTGTTATTTTTATATATAAAAAATTATTCTTATTTTATTGTAATTATAAAA  
ATACTTCTATAAAAACATATATAATTGCAGTTTTTTTT  
TATTAAGAATCAATAATTATATATTTTAGTATATATCTAACTTGAGTCTTTTAAAGAATATTT  
TTAATGATATTAATTAATAGGATAAATTATATATT  
TTAATATAAGAGGAGGAAGCAATGTAATCGCATCTTTTGGAGGAAATGTGTAATTTATT  
TTGTATTTTACATAAGAGAGAATTAAGACACTATAATACT  
GATTTATTTGATGAGAGATGATGTATTTTAAACATAAGAGAAGAGAAAACAATATAATTTA  
CTTCAATGAGTTCTATCCCACTAATGATGATAATGTATC  
CAATATCCTTAACTCAAGGAGTGTTTTGCAAAGTGTGAGAGATACGTCATTACTTTTT  
AGATTGAACATATTTTTTCATCGGGTTGATAATCTAATTAAT  
CACTAGCCCACAAAATATAGATTGAGTTTAGTACAATTTTCATCCCGCTAGTTATATTTGG  
ATACCAAATGGTCACTTTTTTTTTTTAATCTGGTGACGAT  
ACAGATACATAAGTTGTATGCAACAACTTTTATTTACAACAATTTATACACTAATTGTTTA  
TGAAAATAAAAATGTTTCTGATTTGTAGGTTTCATGTCTT  
CACCAAAGAATTGATCAATGAAGGCATGCGAATGCTGAAGCATTACCCGTTTCATGTT  
GTGGACAATATCATTACCTCTTTGGCAAACATGGAATATGGT  
GATCTATCTAAGTACGGAATTTATCAGCCCAAAAAGGACCCTTTTCATCTTAAGTTTATA

ACTGGAAGGGCTCCAGTTATCGATGTTGGAACCATTGAAA  
AGATTAAGGAGGGAGCAATTAAGGTACTTACAACCATGTTATCCATATGCCTTTTATTTT  
AACAAAATAAAATTATATCAATTTTTTTAATTTTTTTTT  
CATAGTCTTAATTTTACAAATATTATACATTTGGGTATTTCTGGAATTTTCTTCATATTAAT  
TTGTGCTCCCAACAGGTAATTCCTTCTCATATAGTGAG  
AATTGAAAACAAGAAGGTCATATTTGAAAACGATGCTGAAAAGGAGTTTGATGTAATC  
GTGTTTGCTACTGGCTACAGAAGTGTAGCTAATAAGTGGCTT  
AAGGTATGAATAGAAGTGTAGGACTTTTATTTAAATTGTATTTATTAATACGTTTTTTGTG  
CATTTTATTTTCTTTTTTTCACATCAAATGAGCTTTAATC  
TTCTACGCCTTATATATGCTGCCAAAACAAGAATATATGTATATTTCTTCAAACAAGAA  
GATAAGTACAATTTGAATTCACTAAAATGATTGATTTCTA  
TTGCAGGATTACAAATATGTTCTAAATGATGAGGGGATGCCGAACAATGATTTTCCAAA  
CCATTGGAAGGGTGATCGTGGATTATATTGTGCAGGACTAT  
CAAACAGAGGCTTATTTGGAGTCAAATGGATGTTGAGGCTATTGCTGATGACATCAA  
CCAAACTCTCAAGTTACATTAA

>Glyma.06G152700

ATGGAGGAAGTATCAGTTATAATTGCAGGTGCAGGTCCTTCTGGCCTTGCAATTTCTG  
CATGTCTATCACAAAACCTCTATCTCTCACATAACTAGAGA  
AAGATGATTGTAGTGCCTCTCTTTGGAGGAAAAATGCTTATGATAGATTAAGCTTCAT  
CTTGCTAGCGAGTTTTGTGCTTTGCCTCTCATGCCTCACTC  
ACCCTCATCCCCAACCTTCTATCCAAAGATGAGTTTGTTCATACATTGACTCATACA  
TTGCCCGTTTCAACATAAACCTCTCTATTGTCGTTTCATT  
GAATTTGCTGCGTATGATGAAGTTGAAAACAAGTGGAGGGTCGAAGCAAAGAACA  
CTTGAAGGCACAAGGGAAATTTACGTAGCTAAGTTTCTTGTGA  
TTGCCACGGGTGAAAATAGTGAAGGGTATATTCCTGATGTGCATGGACTAGAAAGCTT  
TGAAGGAGAGATAATGCACTCCAAATACTACAAATCGGGTTC  
AAAATATGAATCCAAAGAGGTTTTGGTAGTTGGGTGCGGTAACCTCTGGAATGGAGATT  
GCTTACGATCTCAATGACTGGGGTGCAAACACTTCTATTCTC  
ATCAGAAATCCGGTATTTCTTTTACCCACTATATATATCCATGTTGGGATATTATTTATATA  
TGTGTGTGCGGGCATAATTAAGTTTCTAGTTTGTAGAC  
CATGTTTTAGTTTTTTGGATATTGTTTTGTATACCATAAATAGTTTTTCCCTTTTTCTTTT  
AGTTAAAAGGATTGGTTTATTTAATTTCAAAGAAAA  
AAACAATTTATGTGATTTAATAAAAAGTGTTTTTATAGAAAATTGATTTTATTCTAATTATA  
TAAAATACTTTTATTAATAATATATAATTACAGTTTTT  
TTATTAATAATTTAATAATTATATATTTTAGTATATATTTAATTTGAGTTTTTTAAAGAATGTT  
TTAATGATATTAATTAATAGGGTAAATTATATAT  
TTCAATATAAGAGGAGGAAGCAATGTAATGCTTGCATCTTTTGGGGGGAAATTTATAAT  
TTATTTTGTATTTTATATAAGAAAGAATTAAGACACCGTT  
AATACTCATATATTTGATGAGAGATAATGTATTTTAAACATAAGAGAAGTGAAAATAACATG  
ATACACTCATACATCTCATGAGAAAAAATGTAATTTAAT  
TTTTTATGGTTGATGCCCTCTCATCCCACAGGATCCGTTCCCTGATTTTCATGATTATATT  
ATATTTGTATGACGAGTTCTAGCTATCCCAGTGATAATGA  
TACTTATGATGTATTTAATATCCTTGACTCAAGTAGTGTGTTTTGCAAAAAGCATGAGAGA  
GACATCATTATTTTTTAGATTGAACATATTTTTTCATCGGGT

TGATCATTTAATTAACCACTAGCCCATAAAATATTGATTGAGTTTATTTTAGTACAATTTT  
ATCTCGCTAATTATATTTGGATGCCAAATCTCTTTTTTT  
ATTTTTAATCTGGTGAGGATACACATACATAAGTTGTATGCAACAACCTTTTATTTACACT  
AATTGTTTATGAAAATAAAAATGTTTCTGATTTGTAGGTT  
CATGTCTTCACCAAAGAATTGATCAATGAAGGCATGCGTATGATGAAGCATTGCCCCA  
TTCATGTTGTGGACACTATCATTACCTCTTTGGCAAACATGG  
AATATGGTGATCTATCTAAGTATGGAATTTATCAGCCCCAAAAAAGGACCCTTTTACGCTT  
AAGTTTATTACTGGAAGGGCTCCCGTTATCGATGTTGGAAC  
CATTGGAAGGATTAAGGAGGGAGCAATTAAGGTACTTAGAACTTACAACCATGTTATA  
CATAACATAAGCCCAAATAAATTATTTGTCCCGTTAATGCA  
ATCAAATGATAAGAAAAAGGACATGAGAAAGAATACAAGTTGTGGCTTCATTTCAA  
GATTTTTTTTTTCATATTTAGTAAAAGAATAAATATATTTTT  
AAACACAATATTCTCGAGATTTTTTTTTGGTTACAAAAGATTCTTGAGAATGTTACTTTA  
TGAAGTAGTAAAAAGTTTTTTTTCATGATAATTAAGTAT  
TAATTTATGAACTTTCTAATAATAATTGACAGTAAGTATATTATTTAAGAAAATATTTAT  
TTTTATTTTTTTCATAACCTTAATTTGAAAATATTAT  
TTCGAGAATCATTTGACAATGAAAAATTTCAATACTAAACATCACTTTAATATGGGTAT  
TTCTGGATTTTTCTTCATATTAATTTGTGCTCCCTACAGG  
TAATTCCTTCTCATATAGTGAGAATTGAAAACAAGAAGGTCATCTTTGGAAATGATGTG  
GAAAAGAAGTTTGATGTAATCGTTTTTGTCTACTGGTTACAT  
AAGCGTGGCTAATAAGTGGCTTAAGGTACGAATAGTACTTTTAGCACTTTTCATTTAAA  
TTGTATTTATTAATACGTTTTTGTTCATTTCTTTCTTTT  
TCCACATCTCTCAAATGGGCTTTAATTTTTTACTCCTTGTCTATGTTGCCAAAACAAA  
GAATATATGTCCATTTCTTCAAACAAAAAGTTAAGTACAAT  
TTGAACTCACTAAATTGATTGATGTTTATTGCAGGACTACAAATACATTCTAAATGATGA  
GGGGATGCCAAAAAATGATTTTCAAACCATTGGAAGGGT  
GATCGTGGATTATATTGTGCAGGACTGTCAAACAGAGGCTTATTTGGAGTCAAATGG  
ATGCTGAGGCTATTGCTGATGACATCAATCAAACCTCTTAAGT  
TACATTAA

>AtYUC11(At1g21430)

ATGGAGAAAGAAATCAAGATTCTGGTTTTGATTATCGGTGCAGGACCAGCCGGTTTA  
GCAACATCAGCTTGTCTTAACCGGTTGAACATACCAAACATAG  
TAGTGGAAAGAGATGTTTGCAGTGCCTCTCTGTGGAAAAGAAGGTCTTACGATCGTC  
TCAAGCTCCACCTCGCAAAGCAATTCTGTCAACTCCCTCACAT  
GCCATTCCCCTCAAACACTCCTACCTTCGTCTCCAAGCTAGGTTTCATCAATTACCTT  
GACGAATACGCCACACGTTTCAACGTAAACCCTAGGTACAAC  
CGGAACGTCAAATCCGCGTACTTCAAAGATGGTCAATGGATCGTGAAGGTGGTGAAC  
AAAACCACGGCGTTGATAGAAGTTTACTCGGCGAAGTTTATGG  
TTGCTGCGACGGGAGAGAATGGCGAAGGTGTGATTCCAGAGATTCCGGGGCTTGTA  
GAGAGCTTTCAAGGAAAGTATTTGCACTCAAGTGAGTACAAGAA  
CGGAGAGAAGTTCGCTGGAAAAGATGTTTTGGTCGTCGGATGTGGAAATTCTGGCAT  
GGAGATTGCTTATGATCTATCTAAGTGCAACGCTAATGTCTCC  
ATCGTTGTTTCGTAGCCAGGTGAGTCTACATTACAAATGAACTTGGTTATGAGTTGTAA  
CAATTAATCCGAATAACAAACATTTTTATCGTGTGTTAAAT

ATAGGTGCACGTGTTAACGAGATGTATCGTACGGATAGGAATGTCGTTGCTCAGGTTT  
TTCCCGGTAAAATTAGTTGACCGTTTGTGTCTATTACTAGCG  
GAGCTGAGGTTTCGGAATACTTCGAGATATGGGCTTGTAAAGACCCAATAATGGCCCAT  
TTCTGAACAAGCTAATCACCGGCCGGTCAGCTACCATTGACG  
TCGGCTGCGTCGGAGAGATAAAGTCCGGCAAGATTCAGGTTGTGACGTCGATTAAG  
CGTATAGAAGGGAAGACAGTAGAATTCATCGATGGAAACACCAA  
AAATGTGGACTCCATTGTCTTCGCAACTGGTTACAAAAGCAGCGTTTCAAATGGCTT  
GAGGTATTTTTGCAACTTCAGACACAAAAACAGAGAAAAGAA  
ACTCTGTTCTTGGTTTTTAATGGCTCTGATGTGATACACAGGTCGATGATGGAGATCT  
GTTCAACGAGAATGGGATGCCGAAACGCGAGTTCCCGGATCA  
CTGGAAGGGAAGAATGGTTTGTATAGTGTGCTGGCTTTGGGAAACAAGGCTTGGCTG  
GTATTTCAAGAGATGCTCGGAACATTGCTAGAGACATTGATTCT  
CTGGTTTGTGGGAGAAGCAGCAAGAACAAGCTTTCCAATAA

>Glyma.06G120700

AGCACCCCAGCAAAGAGAAGAGAAGAAAACCACCAAAGACTCTGCATTACCAATTTG  
AAATCAAACCAAACCAAACCATGGAAATTGAAGTTCCTGT  
TGTGATTGTGGGTGCAGGCCCTGCTGGCCTAGCAACCGCTGCATGCCTTAACAAATA  
TTCCATCCCTAACGTTGTTTTGGAAAGAGATGATTGCCATGCA  
TCTCTTTGGAGGAAAAGGGCTTATGACCGCTTGAACTTCACTTAGGCAAAGATTTTT  
GCAACCTCCCTCACATGCCATTTCCGCCTGATTTTCCCACCT  
TTGTCCCTAGGGTTGACTTTTTACGCTACTTGGACAACCTATGTCACCCGTTTTAAAT  
TCCATCCGGTACAACCGGAATGTGGAATCTGCTTCTATGGA  
TGAACAAAACAATGGGAAATGGAGGGTTGTTGTCAAGGACACAACAACAATGCTGA  
TGAGGTTTACGTGGCAAACCTATCTGGTGGTTGCAACTGGGGAG  
AATAGTGAAGGGTATGTGCCCCAGATTGAAGGGCTTGAAGGATTTGAAGGGAAACAC  
ATGCATTGCAGCGAGTACCTGAATGGAAGAGACTTGTATGGCA  
AACATGTCCTTGTGTTGGCTGTGGCAATTCTGGCATGGAGATCGCTTATGATCTCTC  
AAATTGGGGTGCAAATACCTCTATTGTTGTTAGAGGCCCTGT  
AAGTCTTTTTTTCCCCTCTCTACATGCCCTTACGTGGATTCTTCTTATTACAAGACAA  
GATTTATAAAAAGTTGTCTAAATTAATCTTTAAATTTGTAA  
AGGATGATGCTTTTTTAGTCCAACAGGAGACTAAAATTTATTTATTTTTACAAAAATTA  
AGATGGGTATTTTTGCTTTGAAATTATTTAATCATAATT  
TTGTGAATAAATAAATGAGAATCGCTTCGAACAATATTGTATACCATGTTAGTCTTAAAT  
AAATAAATTAGGTTTTCTTCAACAGGATTGTTTCTGAAA  
GATCGAAAAGATCTATGAGAAATAAAAATTAATAAATAAAAAATAAATTATATACCATG  
CATTTGTTTATGTATGTTCAAGACTAAAATATTTAAAAA  
AAATTCAAATGGATAGCTTTGAAGATGTTTTAATAATTATTTTGAGAAAAAATGAAAAT  
GATTTCGAACATGATTGTTTTCGAAAGAAAAGATTGGTGA  
AAAACAAAAAATAAATAAATGAAAAAAAATTATACCATGTTATTTGTTTTGTATGGTT  
GAGACTAATTTAAAAATAAATAAATTAAGATGGATATT  
TTTGCTTTGAAATTATTTAATGGTAATTGTGTGAATAAACAATTAATGAAAATTATGTT  
TGCCATCTATTTCTTTTCTTTGTTATAAAAAGTTTAGG  
TGAGTTAAAAAACTCACCATAAATCAGAGTAAGTCTCATGCTTCAAATAAGTCTTACGG  
AATTTTATAGATCTAAATTTTATGATCTCTCTTTGTATAG

G TTCATTATTTTACCAAAGAAATGGTGTACGTGGGAATGTCCTTGCTGAAATACTTCAA  
AATAGAGAAGGTGGACAAGCTTATGTTGCTCATGAGCAAAC  
TGAAGTATGGAGACATGTCCAATTACGGCTTGATCAGGCCAAAGGATGGACCCTTCT  
TTCTGAAGAAAAAGGGTGGAACTACCCCTACCATAGATGTGGG  
TTGTGTTAGTAGGATTAAGAAAGGCGAAGTGAAGGTATTATATGTCTGAAAACACCGT  
T TACTTCATATTAGTTCCTTAAATTATTGATTTGGTTTGTCA  
CTTTTTGTATT CAGGTTTTCCCAGCTATTTCAAGCATTAAAGAGGACAAGTTGATTGAG  
TTTGAGGATGGACAAAATGGTCAATTTGATGTCATCATCTT  
TGCTACTGGATAACAATAGCACTGTGCTGAAGTGGCTTAAGGTTGCATCATAACATATAT  
TTTAAATAGGAACATGATTATTTTTGTCCCAATAAGTTGAA  
TTGTTGATTTTAGAATGTGCCTGAGACATGCCCTAATTA ACTATTGTTTGTGTGACTTT  
GTTGTGTCCATACAGGATTACAGAGGGCTGTTCAATGAGAA  
TGGAATGCCAAAACCAGATTTTCAAATCACTGGAAGGGAGAGAATGGTATCTACTG  
CGCTGGATTTTCAAGAAGGGGATTAGATGGCATTGCTTTT GAT  
GCCAAGCGTATTGCTGCTGACATAAAAAAGACCGTGAATATAAAGA ACTTACCCAGTG  
AAGAGGACAAC TTTGCTTCCTTCAA ACTCTTAGAAAAATAAG  
TACACACACAAA ACTAAAAAAATGCCGTAGTGTATGGTTATAGTAATTAGTTTTTACGT  
TTGTGTGTGGTTAAGTAATGAGTTCCTTAGAATAAAAGACA  
TGACACCTGAAGTACTTTCCCCTGTCCGTGGATTTTGAGTGTGTGGTTCAGTTATGAA  
CCATGGGATTACATGACCCATATATGTTTTTTTTTTTGT TTT  
TTTATTTGGTGTTCAGCTATATATGTCTCGTCTAAATAAAAGAAAGAA

>Glyma.04G242500

AGCAACTGCCAACCAAACCAGGTTATGAATAGCCAGGCTTATAAAAGCAGCACCC  
AGCAAAGAGAAGAAAACCACCAAAGCCACTGCATTACCAATTT  
GAAACCAAACACCAAACCAAACCATGGAAATTGAAGTTCCTGTTGTGATTGTGGG  
TGCTGGCCCTGCTGGCTTAGCAACCGCTGCATGCC TTAACAAA  
TATTCATCCCCAACGTTGTTTTAGAAAGACATGATTGTCATGCATCTCTTTGGAGGAA  
AAGGACTTATGACCGCTTGAAACTTCACTTAGGCAAAGATT  
TTTGCAATCTCCCTCATATGCCCTTTCCTCTAGATTTTCTACCTTTGTCCCTAGGGTT  
GACTTTTTACGTTACTTGGACA ACTATGTCACCCGTTTTAA  
GATTTCCATCCGGTATACCCGGAATGTGGAATCTGCTTCTGTGGATGAAGAAAACAAT  
GGGAAATGGAGGGTTGTTGTGAAGGACACAACAACAATGCT  
GATGAGGTTTATGTGGCAGACTATCTGGTGGTTGCAACTGGGGAGAATGATGAAGGG  
TATGTGCCCCAGATTGAAGGGCTTGAAGGGTTTGAAGGGGAAC  
ACATGCATTGCAGCCAGTACCTGAATGGAAGACACCTGTATGGAAAAAATGTCCTTGT  
TGTTGGCAGTGGCAACTCTGGCATGGAGATAGCTTATGATCT  
CTCAACTTGGGGTGCAAATACCTCTATTGTTATTAGGGGCCCTGTAAGTCTTTTTTCTC  
TCTACATGCCCTTTACGTGGATTCTGCTTATTACAAGACAA  
AATATATAAAAAGTCGTGTAAATTAATCTTAAAAAATGTAAAGGATGATACTTTTTTAGT  
CCAACCGGATACTAAAATACTTTTTAAAGAAAATTAAGA  
TGGGTATTTTTGCTTTGAAATTATTTAATGATAATTTTGTGAATAAATTAATGAGAATTGT  
TAAGAACCTAATTGTTTCTAAAAGAGGAGATTTCGTGGGA  
AACAAAAATAAAATAAATGAAAAACAAAATTATATACCATGTTTTTTTTTGTATGCTTTA  
GACTAAAATATTTTAAAAAATTA AAATGATTATTTTTGC



TTTGAAATTATTTAATGATAATTTTGTGAATAAATAAATGAGGATTGCTTTGAACATGAT  
TGTTTCTAAAAGAGGAGATATGTGAGAAATAAAAAATAA  
AAAACAAAATATATGCCATATTATTTGTTTTATATGTTTGAGATTAAATATTTAAAAA  
AATAAAATGAGTATTTTTGCTTTGAAATTATTTAAT  
GATAATTTTTGAATAGATAAATGAGGATGGCTTCGAACAGGGTTGTTTTGAAAGAGG  
AGATTGGTGAATAAACAAATAAATGAAAAAAATTATATGC  
CATGTTTTTTGTTTCTGTATTTTGTGACAAAAATTTTTTAAAAAATTAAGATGGGTATTT  
TTGCTTTGAAATTATTTAATGGTAATTGTGTGAATAAA  
CAAATGAATGAAAATTATGTTGGCCATCCATGTTTGTTCCTATTATATGTTGGCGATA  
TGCATGCTTCAAAAAGGGCTTTCAGAATTTTATAGATCTA  
AATTTTATACATCTCTCTTTGTATAGGTTCAATTTTTACCAAAGAAATGGTTTTCGTGG  
GAATGTCCTTGCTGAAATACTTCAAATGGAGAAGGTGGA  
CAAGCTTATGTTGCTCATGAGCAAAGTGAAGTATGGAGACATGTCCGAGTATGGCTTG  
GTCAGGCCAAAGGATGGACCCTTCTTTCTGAAGATAAAGGT  
GGAACTACCCCTACCATTGATGTGGGTTGCGTTAGTAGGATTAAGAAAGGCCGAAGTA  
AAGGTAGCTATATGGACTCACTTGATCATATATCTGAAAATAC  
CGTTTATTTTCAATTAATCCTTATACTATTGATTTGGTTGTCACTTTTTGTATTGAGTT  
TTCCCTGCTATTTCAAGCATCAAAAAGGACAAGATGGTT  
GAGTTTGAGGATGGACAAAATGGTCAATTTGATGTCATCATCTTTGCTACTGGATACA  
ATAGCACTGTGCTGAAGTGGCTTAAGGTGCATCATAACATAT  
GTTTTTCATAGGAGCATATAACTATTTATGTCCCAATAAGTTCAATTGTTGATTTGAGAA  
CGTGCCTGAGACATGCCCTAACTGTTGTTTGTGTGACTTG  
GTTGTGCCATGCAGGATTACAGAGGGCTGTTCAATGAGAATGGAATGCCAAAACCA  
AGTTTTCAAATCACTGGAAGGGAAACAACGGTATCTACTGCG  
CTGGATTTTCAAGAAGGGGATTAGATGGCATTGCTTTTTGATGCCAGCGTATTGCTGA  
TGACATAAAAAGACTCTGAATGCAAGGAAGTACCCGGTGA  
TGAAGAGGACAATTTTGTCTCCCTCAAACCTTAGGAAAATAAGCACACACAAAAATA  
AAATAAATGCTGTAGTACAAGTATGGTTAAGTAATGAGTTTT  
ACGTTTGTGTGTGTGGTTAAGTAATGAGTTCTTAGTATAAAAGACATAGCTGCTGAA  
GTAATTTTCTGTGATGGATCTTGAGTGTGGTTAAGTTAT  
GAAGTATGGGATTACATGACCCATATATTTTTTATTTGGTGATCAGCTATGTCTCGTT  
CTAATTAATAGAAGAAAGAAATATACAGAATGTAGAAGT  
TGATAAATAA

>Medtr1g008380

CTTTTAGTTAGTACTCATCCTTCCCTTAAATAACCCTCCTCCATTGAAAACAACACACA  
CACAAAGCACAAACACAAACTCAAGAAATATTTTCAATTTCA  
CAATTGAACCAAACCTTCTTTAGCTAAGAGGGCCAAAAGTTGCCACCAATCCTCAAAA  
CACTTCATTCATAACAGAGCCTTTTTCTCTTGAAACTCAACC  
TGCAGTTTTCAAACACAACAAAAATCCAAAACCAACCATAAAGAACTCAATATTTAAAG  
ACATTAATTTTGTCTTTGTCCGGTTCATTCTTAAACTTCAC  
TTGCTAAAATTTCCCTTTGCTCCTTATTTTCTTTTTCAGTATCAGACCTTGGCGCTTCG  
ATTCGTCAAAGAGAAAGAAAAAATCTGTTTCATTACATA  
TTTTTCAAATGGACTGTTATCTAAGAGAATTAGAAGGAAAACAAGCACATGATCCTTT  
ATTCATAGAAAAATGATCAACAACAAGAATTCAACTT

CTTCAAGTGATAGATGTTTATGGATTCCAGGTCCATTGATAGTAGGAGCAGGACCATC  
AGGACTAGCAGTGGCAGCATATCTAAAACAAAAAGGTGTTCC  
AAGTTTAATACTAGAAAGATCAAATTGTATAGCTTCACTATGGAAGCTAAAACCTACG  
ATCGTCTTCGTCTTCATTTACCAAACAAGTTTGTGAGCTT  
CCTTTAATGGAATTCCTAGTGGTTTTCCAACATATCCAACAAGCAACAATTCATAGA  
GTATTTGGAAAGTTATTCCAAAAATTCGATATTAGGCCTT  
GGTTCAATGAGACAGTTATGCATGCTGAGTTTGATGCTACACTTGGTTTTTGGAGGGT  
GAGAAGTGAGGGGAAGGCGGGAATGGTCACCGAATTTGTTTG  
CCGGTGGTTGATCGTTGCAACCGGAGAGAATGCTGAGGCGGTTGTACCCGAGATTG  
AAGGAGTTGATGAGTTTGGTGGTAGTATTAGGCATACTAGTTTG  
TATAAAAGTGGTGAAGAGTTTAGAGGGAAGAAAGTTTTGGTTGTTGGATGTGGAAATT  
CAGGTATGGAAGTTTGGTGGATCTTTGTAATCATGATGCTG  
CTCCTTCTATTGTGGTTAGAGATTCTGTAAGTACTCACAAATCTTCTCCTTTTACTTTC  
TTTTTTTTCTTCTTTTTTAACTTTTTCGTTTCAGAAATG  
GAACCGATGCACAATGCAGCAGTTGCGAGAATCGTTAGATTTAGAGAAAGAAATTTTT  
TCTATCACTAAGTCTATGGTTTTCCGCAGCTGCTGCAGGGAT  
GTAGTGTGCCTATGATTATGAAAATCAGCATGTACTAAAAAATACTATAAAGTTGTTTT  
TATTTTTGGTTAAAAGTTTTTACAACCTCCCTATTTTGG  
ATTGATGTTTTAACATGAACATAACTAATTTAAGCATAGCAACAAGACATTCACTTTTTC  
TTCTTTTTATCAATTTTTGTTATTTTTATGGGCTTTTGTCA  
AATTTGAAATATAGATTACTTCTTATGTCAAACCTCAAATAAGTGATTTTTTATTTTTATTT  
TTTTATTCAAACATGCTATATATGTTTGCATAAACAT  
AAAATATTCGAAGTTCCTTGTAGCATAAAATTC AATATTAGTAACTTCTATCTTCAAATTA  
AGAAACATGGAAATTTGTTAGGTTCACTTCTGAAAGGAAA  
AAAAAAAAGTTACATATTGTGAGACATAATATGCAAATAAAATTCACCTTCAAAGTTCAA  
AGTTGTGTTTTGTTTTTTTTCTCTAATATAGCATATAAAA  
TCAAGCAAAGTATTCATAATTTTCATGTAGTGGCTACAGGTACAATGAATTGTTAATTTAG  
ATCCATTTGAAAAGTATTTTTGAATATTTCATTTTTTGA  
GCACTAGTATTATAAAAAGCATTTTTTGTAGATTCTCAAGCATGCCTAGCATGGGATAGA  
AGATGACCCAGTTGCTTTTTTCCCTCCTTTTTTCCCTCCCAT  
GATGTTCTTTGCAAAAGAGATACTCTTCTCTTGTATTATTACAAGTAGAGCATGGCCA  
CCAACACAATTAAGGTCTATCAAGGGCCAAAAGCCTCCCAC  
ATAAGCTCTTACCTTTTTCTTTTTTTGTTTTTTTTCTTTTCACTTTTTTGGTGTTTTGG  
AATGAAGCTGTTATGTGATGGGAAACACCAAAGCATCTCC  
ACAAC TAAGTTTTAAGTCTAGTCATGGTTGAGGTCACGTCGCTTCCCTAATAATATGAA  
AAAGAGCACTTAAATTATGGCGGATGTGACCTTAATCACAT  
TCGCATCATGATGATCGAAATTTGGTCTTTAAAGTTTGAATAAAAGTCTCACTTAGATGA  
AAAAGTAGATGTTGAACATGTAATAAGATGACTCATATCT  
ACGTTTAATGGTTTTGGATGAATATGTGGTCCCAAACTTGTTTGTGTCGTTGTTAAAA  
GTCTAATGTGATGATCTTCTAGACTCTTCTTATGACTCAAT  
AGTAGTATAAGAGCAAATGATTTAGTTAAAGGTTGACCCTACTCTTGTGTTGAAAGTC  
TTTATAACCATGGTGGTTTGAAGGTCTGTCTTGTTGATATT  
GTGTCAAAGGTGGTGAAGTGTATGTAAAGGGAAAGTGTATCAAATTGATTTTGCGCC  
ATCGACAATGCAAGTGTATGAAAACGCTTTTTGCTTTGGGGGT

ATACATAGATGAATTGATCGATTACACTTAATAGAGAGATTGTTGGTATTTCAAATATT  
AGCAAGAGTCTTACATTATCTTTAAAAAGTGAATGTAAAG  
CAACACAACAATAAGATATCTTATATACACAATACCTTTTTATTTTTGGTAAAAATGTCAT  
GTGCAAATTCATGTATGTGGTACTCAAATTCACATAAT  
ATTGTAAC TTCAATGAACAAAATTCAAAGTTAAGCTTGTATAATATCACTTAACAACAA  
TTTTCCACCTCTACCATATACTTTTTTATAGAAAAAGGTAT  
ACTCAAATTATGCAAGAAAACAATCTCATCATGGTACTTTTTCTCTATTGGTTTGATTGA  
AGGTACACATCCTACCAAGAGATATGCTGGGAAAATCAAC  
TTTTGGGTTGTCCATGTGGTTGCTCAAGTGGCTACCCGTGCAACTGGTGGATCACAT  
CCTTCTCACTGTGTCATGGTTAATGCTCGGCAACACAGAACGG  
TTCGGTTTGGTTCGGCCTCGGTTGGGTCCCCTTGAAC TAAAAAACTGTCTGGAAA  
GACACCGGTCCTAGATGTGGGTGCCCTTGCCAAGATTAAAAGAG  
GAGACATCAAGGTATTTTCTATCAAATCAAATCAACTTTTTTAAATCCTTAAGATTTTA  
GTGTCAC TTTGAGTCTAAAAAATAGATTTTGTGTCACCCC  
GGAAATTAGTTTATTTGGACGCTTTTTCTTTTTAGTCATAGGAACATTTTAACTAATGA  
AAGTACTTCTGTATATTTGTTTCACCTTTCTTTCTTGTT  
TGAAAGATTTTCCATGATCATGATGTGCTTTCAATCAAATCATACTTTATTAAGGCTCAT  
AATCTGAGTTTACTTTTCGATATATAGTGTAACCGTGAAAC  
ATTTTATATTGTTAAACAATAATCATAATTAATTGTATATTGACTTTTAAACATAGTTATACT  
TTTTTTGTCAAAAAAAAAAAAAACATAGTTATACTTTT  
ATCCTTCAAAAAACATAGTTATACTTTTTTTATTTGACTATTAGTCTAATGGCCAGACAT  
ATTGAAGTAAATTTACATAAGGATTGACATAAAATGT  
TTTCACAATCAAACAACTATTATAGACCGTAACAAAGAGGACGTATAATTATAGCTACTT  
AGTCAAATATTTTAAATAAATTGACAGTTATAATTAATCGA  
CAATGTAAATATTTTACACTAATTACAAC TATACATAGTAATTAATCTTTAGTGGGAAT  
TTAACAAAAGTTAATAGACAACATCGTTATCATTGAAAC  
TCGCAATACTTCTTTTCTTCATATCTAGTGTGAGTATTACCTTTAAACTCCTGAAAATAA  
TTAAAAGAAGCTGATGATATAAAATTTTATCACTGATTCT  
ATATATTAATCATATCTTGAGTATAATTATTTTTATTTAATTGTTAATTGAACTCCATAGTT  
CCCTTGTT CAGGTACGTCCAGGCATAAAGAGGTTAAA  
ACGCTACACAGTGGAAATTTGCTGATGGAAGTACAGAGAATTTTGACGCCATAACTG  
GCAACTGGTTACAAAAGTAATGTACCCTATTGGTTAAAGGTA  
AGTTATAATCCCATTATGCACTCTTTAAAAAAAATCCAAACAATGAAAACGGCACTATT  
TGTTTTATCTTAGTTGACTTTACTAATCATATGATATCGG  
ATCTCATCATGATATCATATTTGTAATATTATTTATTAATTAATACATGCACAAATATTCAT  
TTTATAAAATATAATTAATTTGAATGTTTGCACTTTG  
CATGCAAAGAAATTATACTATGATACCTCTAATGAAAATATGTTTTCACTTTGTTTTAT  
TTACTTTTTTTTTTTTTTGAGTAAACTTTGTTTTATTTA  
CTTTAATTACAAAAC TATTACTTTATTGTTTAAATTTTATTTTCTGTTTTCAAATATTTATG  
AACAAATAACGAGAATTGAGAACAATTTTTTTCACAT  
ATGAAGAAACGAAAGACTTTGAAAAAAGATTGGAATTTTGTACTTAGAATTGACAGC  
AAAAAATCAAACAAAAAACTTTTTATATAACTAACATGTGC  
TAAAGTTTTTTATTTGGAATAAGGAAAATACGGATATGGAATAATTTAAGGCTATCCATC  
TATCTGAATTTTGAAAATGATATAAAGCAAGAAAAAGATA

CTAATAATACAAATAACTGAAATGGTATATGTGCAGGATAAGGGAATGTTCTCTAAGGA  
AGATGGATACCCTAGGAAGCCATTCCCTAATGGATGGAAAG  
GTGAAAATGGCCTCTATGCTGTTGGTTTTACTAAACGTGGACTACTTGGTGCATCTAT  
GGATGCAAAAAATATTGCTGAAGATATTGAACGGTGTGGAA  
AGCTGAGGCAAAGCATATATTTCCACAATCAAATTCATGATTATCTGTTAATTATTTAG  
GTCAAATTAGATGTTATTACATGAATGGTGTGGAGGAAT  
TTTGTGTGCCATTACATATGTGCATAATGTTATCAAGGGTGTGGTGCTCCTCCTTGTC  
CATAAAAATGGAAAGAACAAAAAATATGGTCAGAAAATGTT  
TCCTTTGGTGGTGTCTTAATTCGTGGATTTAATTATAAGCCTTACTTTGAGAATATGTG  
ATGTTGAAATTGAAGAGTGAAGAAGAAAAAAGAATGAT  
GTGCTTTGAGTTTACTATTAATTTTCTGTGGTTTTTTGGTAGAGGGAACATATGCATA  
TTGTATAGTGCAATTTTTGGCTATGTAGGTTTGACTIONGCT  
ATAGAGAAATGGAAATAAAGTGACAAAAAATTGCATTGCGGGCTGATGAGATATTTTC  
CAAGAATGAATGTTTGTCTTGAATTG

>Medtr1g011630

ATGGATCCTTTCAAAGAAAAAGTAAAGTGTGTATGGATTCATGGACCTATCATAGTAGG  
TGCTGGTCCTTCAGGTATAGCAGTAGCTGCTTGTTCATCAG  
AGCAAGGAGTACCAAGTCTCATTCTTGAGAGAAGTGATTGCATAGCTTCACTATGGCA  
AAATAGAACCTATGACCGTTTAAACTTCATTTACCTAAACA  
TTTTTGTGAACTACCTATGATGAGTTTTCTCAAACTTTTCTAAGTATCCTACAAAACA  
TCAGTTCATTTCTACATGGAATCCTATGCTGATCACTTT  
CATATTCATCCTAGGTTAATCAAACCTGTTCTTAGTGCTGAGTTTGATTCAACTIONCTCA  
AATTTGGATGGTTAGAACAAAAGAAGGTGATTTTCAGTATT  
TTTCACCTTGGCTTATTGTTGCTACTGGTGAAAATGCTGAACCTGTTTTCTACAATT  
CATGGTATGGAACATTTTCATGGTCCTGTTGTTCAACAAG  
TGATTATAAATCTGGTCTGAATACAAAATAAAAAGTTTTGGTCATTGGTTGTGGGA  
ATTCTGGAATGGAAGTTAGTTTGGATCTTTGTAGACACAAT  
GCTATGCCTCATTGGTTGCAAGAACTCAGTAAGTTCTTTTTTTTTTTTTCTTTGAA  
TTTTAATCGCGTCACAATCTTTGATATTATAAAAAATGCG  
GTTAATGTGGTCAATGCATCTTTAATGGATATGAGACATGCACAAATTTTTTATTAATA  
GATGTTTAGATTCATGGTGTGATTCGATAAAATTAGATCT  
ATAACCGCAATTTTGTCAAACATTAGCTTTAGTTGTGCTGATTTTGCTAAACTCACCGT  
CGTTCCAAAGTTCTTAGTTAAGTTTGTACAATTCTAGATTG  
TGAACTTTTTTTATATTATTAATACTTTAATAAGGTCATCCATAAAGATAGTATTTTTTT  
TATTATTGTTAATATGTAATCATAGATCATGATAGA  
TATATAATTGTTTAGTACTTAAAATGATGTCATGTATATTTATTTTTTTCCCATTTGGGTA  
ACTAATAATCAACTIONTGGGAGTTTGTCTTTTTGGCTA  
ACTTTGGTGAATATTTTATATGATTGAAGGTACATATTCTCCAAGAGACATGTTTGGT  
TTCTCAACATATGGAATAGCTATGGGACTATATAAATGGC  
TTCCATTAAAATTAGTAGACAAATTTCTCTTGTAGTTTCAAGCTTCTTCTTGGGAAAC  
ACCAATCACTATGGTATCAAGAGGCCTAAACTIONGGCCCAAT  
AGACTIONCAACTIONTGAACAGGAAAACTIONCCTGTACTTGATGTTGGTCAAATAGCACAA  
ATTAAATCCGGTAACATTAAGGTATGTTACTATTTTTTTATA  
TTTTTATATTAATTAATTTAAGAGAAATAAATTTATTAATTTTGAATTTAAATTTGATATTGT

AGGTGATGGAAGGTGTGAAAGAGATAACAAGAAATGG  
TGCAAAATTTTTGGATGGACAAGAAAAGGAATTTGATGCAATAATATTAGCAACAGGGT  
ACAAGAGCAATGTGCCTAGTTGGCTCAAGGTTAAAAATTGA  
TCTGTTATGTTACGTTTTTAGCTTTATCTTATTATTGAAGCACTTATGACCTATCACTATC  
TAGGCTTGGGACACATGCAGAGAGCAGAAACATACAAAT  
GTCTTCTTTTCTTCATGCAAAACGATCAAAGAATAAAATCAGTTTCTTTGGGTTCTGTG  
CTTGCTTGGTTCTCTACCACTTTTTTTTAATATTTTAATTA  
AATTTTTTCACTCATTAAATATTATATATAAAAAACCTGTGTTTCATTTCATTGTGACGTTT  
TATGATGTGTAATAATCTGATGAAATATCTATCTTGCAA  
GCAACTTGTGAAAGACCCTTTTAAAAAGTACTACTATTCTTTTTGTCAAAAACAGTAC  
TAACTTTTGGTCAATTCTTTTTGCATCAAACCTAGTAATTT  
ATTTAATTCAACTTTTGTTTTCTCTTTTTTACATGGTTGTAGAAATCTATTTATTATAT  
TATTATAAATGGCTTATTTTAAATATTCTTTTTTGC  
TTGATTCAGGGTAATGATTTTTTCACTAAAGATGGAATGCCAAAAACACCCTTTCCTCA  
TGTTGGAAAGGTGAACAAGGATTGTATACAGTGGGTTTCA  
CAAGAAGAGGTCTACATGGAACATACTTTGATGCCATCAAATAGCTGAAGATATTACT  
AATCAATGGAACACTTAAGAGCAAGAGTTGTTGTGATTC  
ACATATCATACTACTCAATAATTCATAA

>Medtr1g046230

ATGCCACCAATGTCTCAAACATTCGACCCCGAAGACATTCTCAAAAACCGTTGCATAT  
TAGTGAATGGACCTGTTATAGTTGGAGCTGGTCCATCAGGCT  
TAGCAGTTGCAGCTTGTTTGAAGACCAAATGTTCTTTTTGTCGTCTCGAACGAG  
CTAACTGCATTGCCTCGCTTTGGCAGAATCGAACCTACGATCG  
TCTTAAACTTCATCTTCTAAACAATTGTGTCAACTACCCAATTTTCCATTCCCTGATCA  
CTTCCCTGAATACCCTTCAAATTTTCAGTTCATAAGTTAC  
CTCGAATCATATGCGAAAACTTTAACATAACACCAAATTTCAATGAAACAGTGCTTTC  
TGCTAAGTATGATGAAACCTTTGGTCTTTGGAGGATTAAGA  
GCAATAGGATAAAAAGTGATAAAGTTGTTGAAGTTGAGTATATTTGTAGGTGGCTTGTG  
GTTGCTACCGGTGAAAACCTCGGAGAAAGTTGTGCCGGAATT  
TGAAGGTTTGAAGTATTTTGGTGGAAATGTTATGCATGCTTGTGACTATAAATCTGGT  
GTGAATTATAGTGGAATAAATGTTCTTGTGTTGGATGTGGA  
AATTCTGGCATGGAAGTTTCTCTTGATCTTTGTAACCATAATGCAAATCCATCAATGGT  
TGTTCGAAGTTCGGTGAGTACTTAAACAAAAATTAATTACT  
TTGATTAATGTTAATCTTGATTCATTGTTTGCATTTTTATGTGTATAGATTGTGACCATCT  
TTAATTTTTGTGATTTTTGATTAATAGGTTTCATGTGTTA  
CCGAGGGAAATATTCGGAAAATCACTTATGAGGTAGCTGTTATGTTGATGAAAAGGT  
TACCAATTTGGATGGTCGATAAGATATTGCTTGGTCTAACTC  
GTGTGATTTTGGGAAATGTCGAAAAGTATGGTCTAAAAGGCCATGTATGGGACCTTT  
AGAGCTTAAGAACACTTCCGGGAAGACACCGGTTTTAGATAT  
CGGAGCACTTGAGAAAGTTAGATCTGGTGAATTAAGTTGTTTCTGGAATAAAGAGA  
TTTTCAACAAGGGAAAGTTGAACTTGTGATGGAAGTTCTT  
GATATTGATTCTGTTGTTCTTGCTACTGGCTATAGAAGCAATGTACCATCTTGGCTTAA  
GGTTAGTTTGTGTTAGTCTTCTTTGTAATTATATATGTCGG  
TGTTGTGTTGGTATCAGACACGACACGTGTCCGACACCAAGATACACCTAATCTGAA

GAGTGTCTGTGCTTCATAGTACTTAGTAGTTCACCTTTGTTAA  
GTTGATTATTTAATTTGTCTATGTTATGTATTGAACAGGAGAATGAATTTTTTCCAAAG  
ATGGAATGCCAAAAGATCCATTTCCAAATGGATGGAAAGG  
AAATGCTGGTCTATATGCTGTTGGATTACAAGGAGAGGACTCTCTGGTGCTTCATTG  
GATGCAATTAGTGTGTCTCAAGACATTGCTAAAAGTTGGAAA  
GAAGAAAATAACAAAGAAAAGAAAACAGTGGCTGCACGTCATAGGAGATGCATATCA  
CACTTCTAA

>Medtr1g069275

CTCCATTCATTCCAAACTCACATGCTCAATTCTCAACCTTAGTTCCTCTCTCTTTCT  
CAACCTCCAAACCTTCTTCATTCAAATCAAACCTCTTCCAA  
CTTTAACAAACAAAATATTTTCAACACTCTCGCCAGTACCTTCTGGTCGAACTCAGGA  
TTATCAAACATTTTCTTCTGAAAACCCGAGAGTTAAAACAAA  
ATGGAGAACTTGATTGCCTAGTCGATAATGAAGAAGACGCAGTCTCACATCGTTGC  
ATTTGGGTAAATGGTCTATAATAGTAGGAGCAGGACCATCAG  
GTCTAGCAACAGCAGCATGTCTTAAGCAACAAGGAGTACCCTTCATGGTTCTTGAAA  
GATCAAATTGCATAGCTTCACTATGGCAAAAAAGAACATATGA  
CAGATTAAACTTCCACTCCCTAAACAATTCTGTCAACTACCTAACTTTCCATTCCCAC  
AAGAATTTCTGAATATCCAACAAAGAAACAGTTCATAAAC  
TATCTTGAATCCTACGCGAAACACTTTGAAATCAACCCGCGATTCAACGAGTGTGTTT  
AATCTGCTAAATATGATGAGACTAATGGGTTGTGGAGAGTTG  
AGACTGTTTCCAATGGAAATGAAGTTGAGTATATTTGTAGGTCGCTTGTGGTTGCTAC  
TGGTGAGAATGCAGAGTGTGTTGTGCCTTATATTGAAGGGTT  
AGGTGGTGAATCAAGGGTGAATTTATTCATGCTTGTGATTATAAATCAGGTGAAAGTT  
TTAGAGGGAAGAAAGTTTTGGTTGTTGGTTGTGGTAATTCT  
GGAATGGAACTTTCTCTTGATCTTTGCAATCATAATGCATCACCTTCTATTGTTCTTCG  
TAGCTCGGTAAGTACTCGAAATGAGTCAATTTAGTCTCTGA  
AATAAACGTAACTATAAAAAATAATTTCTTAAAAATCTTTGACTACATAAGTTTTTTTGG  
TTAATCAATTTAGTCTCTAAAATTGCTCTGAAAGAACTA  
ATGTGGTCGAAGATTTTTAAGTTTGGCGAATAATTTGTGATTTTGTATTATTTCAAGTACT  
AATTTGTAGACATTTTTTTGTTAAGAAAAATAATTTGAG  
TATGATGTATTTTATTTCTCGGTACTAATTAAGGTTGTTGTGTTTTTGGTTGAACAGGTT  
CATGTTTTGCCTAGAGAAGTTTTTGGGAAATCAACATTTG  
GATTGGCAGTTATGATGATGAAATGGTTACCAGTTTGGATAGTTGACAAGATTTTGTG  
ATTTTGGCTTGGTTAGTGTGTTGGTAATATAGAGAAGTATGG  
TCTTAAAGGCCATTGGAAGGTCTTTGGAGCTTAAGAACACAAAGGGTAAGACCCC  
TGTTTTGGATATTGGAACCTTGGAGAAAATTAGATCTGGTCAC  
ATAAAAGTTGTGCCTGGAATTAAGAGGTTTACTAATGGCTATGTTGAACTTGTTAATGG  
TGAAAAGAATCAAGTTGATGCAGTTGTTCTTGCTACTGGAT  
ATCGTAGCAATGTCCCTTCTTGGCTTAAGGTGAGAAATTAATTTTTATTTTTTAATTTA  
TTTTGTGTGTTGTATAAATTTTTAAAATTGGACCGAG  
CAGTTCAAAGAGTTGAACCATGATTCATAGGTCTTGCAAATTTGATGTTTGGTTTCGG  
TTTTGAAACCTTTTTTTTGGGTCTCATCGGATGTTTCTCTTT  
ATTCTTCCAATACATAAAATATTTTCTATCTTGTGTTTGAATTTTAGAAGCTTCTTTTTA  
CCTTTTTCCCCTTTTGGAAAGTTGAATTAGTAGATTTTA

CTATTTTTGTGTGGAGCGAATAACTAATCTTATTTTTGGTTCATTTTTGTGTGTAGGAAG  
GTGAATTTTTCTCCAAGAATGGATTCCAAAGTCACCATTC  
CCTAATGGTTGAAAGGAAGTGTGGACTTTATGCTGTTGGGTTTACAAAGAGAGGG  
CTCTCTGGTTCTTCATATGATGCTAAACAATTGCTCAAGATA  
TTGCTCAAGTTTGGAAACAAGAGATTAAGCAAAAGAAACACTGCACTAATGCTTGCAA  
TAAACGTTGCATTTCCCAATTCTGAATTGCACAAATTGTAA  
CAACAAACATTAGGCATTAGCAGTTTTGTTTCTTTAGCTAGGAATTTGTTGGTGTATAA  
AAAAAATTAACAATATTTTTGTAAAAAAGAAAAAGATACA  
CAAATAATAGATAGCACATAAGGAGAATTGCTCTTCTCCAATCTGTTTTGCTCATTTT  
CGCTGAGAAAATACACCTGCATGAGTAACTCGTGCTGAGA  
ATACATTTGCCTGAGGCAACTCACGCTCGACTATTTTGATGGGAATGAGCAAAAACAG  
ATGGGGGAAGAGTAGTACTCGCACATAAGAGTTTCGAGCCAGC  
CCTCTCCAGAGGCCCAAGTTTTGATTTTGTCTTGTTTTTTGGGCCCTTTCTTTTGAAA  
GACCAAGGATGATGAGG

>Medtr3g088925

ATGGAAGTTGAAATTCCTGTTGTGATTGTAGGTGCTGGGCCTGGTGGCTTAGCAACC  
TCAGCATGTCTTAACAAACATTCAATCTCAAACATTATCTTAG  
AGAAAGATGATTGTCATGCATCTCTTTGGAGGAAAAGAGCCTATGACCGTTTGAAACT  
TCACTTGGGCAAAGATTTTTGTAACCTACCTCACATGCCTTT  
CCCATCTGATTTCCCAACCTTTGTCCCTAGGGTTGATTTCCCTTCGTTATTTGGACGATT  
ATGTGACTCATATGAAGATCTGCATCCGGTACAACCGGTAT  
GTCAATGATGCTTCTTTTGATGCCACTAATGGGAAATGGAGGGTTTGTGTGCATGATA  
CTACATTGAATCTTGATGAAATTTATGTTGCTGATTATCTAG  
TTGTTGCAACTGGAGAAAACCTGTGATCCTTACATTCCCATGATAAATGGGCTTGAAAG  
CTTTGAAGGTGAATACCTTCATTGCAGCAAATATCTGAATGG  
AAGGCCTTGGTATGATAAAAATGTCTTGGTTGTTGGTAGTGGAAATTCTGGCATGGAG  
ATAGCTTATGATGTCTCTACTTGGGGTGCAAATACCTCCATG  
GTTATAAGAAGTCCTGTAAGCCTTCTCTCTCTCTTCGAAAACCATAAAAAATTCGAGAT  
AAAAATTATGAAATTAGTCTTTAATTTTGTCACTCTCTAACG  
TCTAAAGACGGAATCAGAAATAAATTTTATTGTTTTTGTCACTAATTTTATCAATAATTT  
AATTTATTTTTTAAACAATAGTGATAAGAGATTCTCTGT  
ATCACTCAAACACATATATATATTTTTTTTTAAATCAATTTTTAATAATGGTGTGAATAAAT  
AAATTCATTTCTTGGTTACATTCAAATATACCAAATC  
ATATGTTTTTGTATGTTTGTCTTCTAAGAAATCTGTATGTGGTTCATTTAGGTACATTATC  
TTACAAAAGAAATGGTGTACATTGGAATGTCTTTGCTGA  
AATACATAAGTATTGAAAAGATCGACAAGCTCATGGTGTATGAGCAAAATGGTGTAC  
GGAGATATGTCTAAGTACGGCTTGGTCAGACCAAAGGATGG  
ACCCTTTGCCATGAAAAAGAAGGGTGGCCGTACGCCTACCATTGATGTTGGCTGCGT  
CAAACAGATCAAAAAAGGCAAAGTTAAGGTATATACAATTAAG  
ATTTAGATAATACATTTAATATTGATTATATCTGGAATGTTTTATCTAAGTTAATGGTAA  
AAATTGTTATTTTGTATTGTGTTGTTTAAAGTCGTTT  
TATTTTATTGTTGTTGGTTTTGAAGTTGAGTCCATTGTTTTGTAAGATGATCTTTTTTGT  
GTACGGGTTTAGGGTTACCAACAAAATACAAATACACTT  
GTTTGAGATTTTACTGCGTTAAATGTGTGATTCTTTTATCACAGAAAATTCAGATCCAT

TGATTTTACTCAAGAAATATTATGTATTCAGGTGTACCCG  
GCTATTTCAAGCATAAAAAAGGGTAAGATCATTGAGTTTGCTGATGGAAAAAGTGGTC  
AATTTGACGTCATAGTCTTTGCAACTGGATACAGAAGCAGCG  
TTCAGAAGTGGCTTAAGGTGCAATATAATATAATCTTATATAATATAATGTGTAATTAATT  
GCACCAAATGTAGATTTGAATTAATAATTCATTATTCA  
TTATTTGACATGCAAATATAATGCAGGATTACAAAGAGCTGTTCAATGAGAATGGAATG  
CCTAAAGCACGTTTTCCAGATCACTGGAAAGGAGAAAATGG  
AATCTATTGTGCTGGATTCTCACAAAATGGATTACAAGGCATTCAATTTGATGCTCTGA  
AAATTGCAAATGATATCAGTTTCACTGTTAATGCAATGAAG  
CATCATGATGCTGAAGCCAATGCTGAAATCAAGTTATTGGATGAATGA  
>Medtr3g088945  
ATGGAAGTTGAAATTCCTGTTGTGATTGTAGGTGCTGGGCCTGGTGGCTTAGCAACC  
TCAGCATGTCTTAACAAACATTCAATCTCAAACATTATCTTAG  
AGAAAGATGATTGTCATGCATCTCTTTGGAGGAAAAGAGCCTATGACCGTTTGAAACT  
TCACTTGGGCAAAGATTTTTGTAACCTACCTCACATGCCTTT  
CCCATCTGATTTCCCAACCTTTGTCCCTAGGGTTGATTTCCCTTCGTTATTTGGACGATT  
ATGTGACTCATATGAAGATCTGCATCCGGTACAACCGGTAT  
GTCAATGATGCTTCTTTTGATGCCACTAATGGGAAATGGAGGGTTTGTGTGCATGATA  
CTACATTGAATCTTGATGAAATTTATGTTGCTGATTATCTAG  
TTGTTGCAACTGGAGAAAATGTGATCCTTACATTCCCATGATAAATGGGCTTGAAAG  
CTTTGAAGGTGAATACCTTCATTGCAGCAAATATCTGAATGG  
AAGGCCATGGTATGATAAAAATGTCTTGGTTGTTGGTAGTGGAAATTTTGGCATGGAG  
ATCGCTTATGATGTCTCTACTTGGGGTGCAAATACCTCCATG  
GTTATAAGAAGTCCCGTAAGCCTTCTCTCTCTCTCTCGAAAACCATAAAAAATTCGA  
GATAAAAATTATGAAATTAGTCTTTAATTTTGTGCATCTCTAA  
CGTCTAAAACGGAATCAGAAATAAATTTTATTGTTTTTGTCACTAATTTTATCAATAAT  
TTAATTAATTTTTTAAACAATAGTGATAAGAGATTCTCA  
GTATTCACTCAATCAGTATATTGATAGAGTCTATTTTTTATGAGATCGATAAGCGTAAGA  
GACATTAATCAAACACATACATTTTTTTTTTAAATATCA  
ATTTTTAATAATGGTGTGAATAAATAAATTCAATTTCTTGGTTAGATTCAAATATACCAA  
TCATATATTTTTGTACGTTTGCCTTCTAAGAAATCCATA  
TGTGGTTCATTTAGGTACATTATCTTACAAAGGAAATGGTGTACATTGGAATGTCTTTG  
CTGAAATACATAAGTATTGAAAAGATCGACAAGCTCATGGT  
GTTTATGAGCAAAATGGTGTACGGAGATATGTCTAAGTACGGCTTGGTAAGACCAAAG  
GATGGACCCCTTGCATGAAAAGAAGGGTGGTCGTACGCCT  
ACCATTGATGTTGGTTGCGTCAAACAGATCAAGAAAGGCAAAGTTAAGGTATATACAA  
TTAAGATTTAGATAATACATTTAATCTTGTATTATATCTGG  
AATATTTTATCTAAGTTAATTGTAATAATTGTTTATTTTGTATTGTGTTGTTAAGTCGTT  
TTATTTTATTGTTGTTGGTTTTGAAGTTGAGTCCATTG  
TTTTGTAAGATTTTTTTTTTTTTTTTTTGTGTACGGGTTTAGGGTTTACCAACAAAAAAC  
AAATACACTTGTTGAGATTTTACTGCATTTAATGTGTG  
ATTCATTTATCACAGAAAATTCAGATCCATTGATTTTACTCAAGAAATATTATGTATTCAG  
GTGTATCCAGCTATTTCAAGCATAAAAAAGGGCAAGATC  
ATTGAGTTTGCTGATGGAAAAAGTGGTCAATTTGACGTCATAGTCTTTGCTACTGGAT



ACAGAAGCAGCGTTCAGAAGTGGCTTAAGGTGCAATATAATA  
TAATCTTATATAATATAATGTGTAATTAATTGCACCAAAATGTAGATTTGAATTAATAATTC  
ATTACTCATTATGTGACATGCAAAATAATGCAGGATT  
ACAAAGAGCTCTTCAATGAGAATGGAATGCCTAAAGCACGTTTTCCAGATCACTGGA  
AAGGGGAAAATGGAATCTATTGTGTTGGATTCTCACGAAATGG  
ATTACAAGGCATTCATTTTGATGCTCTGAAAATTACAAATGATATCAGTTTTACTGTAA  
TGCAATGAAGCATCATGATGCTGATGCCAATGCTTGA  
>Medtr3g088955  
ATGGAAGTTGAAATTCCTGTTGTGATTGTAGGTGCTGGGCCTGGTGGCCTAGCAACC  
TCAGCATGTCTTAACAAACATTCAATCTCAAACATTATCTTAG  
AGAAAGATGATTGTCATGCATCTCTTTGGAGGAAAAGAGCCTATGACCGTTTGAAACT  
TCACTTGGGCAAAGATTTTTGTAACCTACCTCACATGCCTTT  
CCCATCTGATTTCCCAACCTTTGTCCCTAGGGTTGATTTCCCTTCGTTATTTGGACGATT  
ATGTGACTCAAATGAAGATATGCATCCAGTACAACCGGTAT  
GTCAATGATGCTTCTTTTGATGTCACTGATGGGAAATGGAGGGTTTGTGTGCATGATA  
CTACATTGAATGTTAATGAGATTTATGTTGCTGATTATCTAA  
TTGTTGCAACTGGAGAAAATGTGATCCTTACATTCCCATGATAAATGGGCTTGAAAG  
CTTTGAAGGTGAATATCTTCATTGCAGCAAATATCTGAATGG  
AAGGCTGTGGTATGATAAAAATGTCTTGGTTGTTGGTAGTGGAATTCTGGCATGGAG  
ATTGCTTATGATGTCTCTACTTGGGGTGCAAATACCTCCATG  
GTTATAAGAAGTCCCGTAAGCCTTCTCTCTCTCTCGAAAACCATAAAAAATTCGAGAT  
AAAAATTATGAAATTAGTCTTTAATTTTGTGATCTCTAACG  
TCTAAAGACGGAATCAAAAATAAATTTATTGTTTTGTCACTAATTTTTATCAACAATT  
CAATTTATTTTTTTTACCAATAGTGATCAGAGATTCTCTG  
TATTTACTCAATCAGTATATTGATAAAGTCTATTTTTTGTGAGATCGATAAGTGTAAGAG  
ACAACAAAATATACCAAATCATATGTTTTTGTATGTTTGC  
CTTCTAAGAAATCTGTATGTGGTTCATTTAGGTACATTATCTTACAAAGGAAATGGTGTA  
CATTGGAATGTCTTTGCTGAAATACATAAGTATTGAAAAG  
ATCGACAAGCTTATGGTGTTTATGAGCAAATGGTGAATGGAGATATGTCTAAGTACG  
GCTTGGTCAGACCAAAGGATGGACCCTTTGCCATGAAAAAGA  
AGGGTGGCCGTACGCCTACCATTGATGTTGGCTGCGTCAAACAGATCAAGAAAGGC  
AAAGTTAAGGTATATACAATCAAGATTTAGATAATACATTTTAA  
TATTGTATTATATCTGGAATGTTTTATCTAAGTTAATGGTAAAATGTTTATTTTTTTTATT  
GTGTTGTTTAAAGTCGTTTTAATTTATTGTTGTTGGTTT  
TGAAGTTGAGTCCATTGTTTTGTAAGATGATCATTTTTGTGTACTTGTTTGAGATTTTAC  
TGCGTTTAAATGTGTGATTCTTTTATCACAGAAAATTCAG  
ATCCATTGATTTTACTCAAAAATATTATGTATTACGGTGTACCCCGCTATTTCAAGCAT  
AAAAAGGGTAAGATCATTGAGTTTGCTGATGGAAAAAGG  
GGTCAATTTGACGTCATAGTCTTTGCTACTGGATACAGAAGCAGCGTTCAGAAGTGG  
CTTAAGGTGCAATATAATATAATCTTATATAATATAATGTGTA  
ATTAATTGCACCAAAATGTAGATTTGAATTAATAATTCATTATTCATTATTTGACATGCAA  
ATATAATGCAGGATTACAAAGAGCTGTTCAATGAGAATG  
GAATGCCTAAAGCACGTTTTCCAGATCACTGGAAAGGAGAAAATGGAATCTATTGTGC  
TGGATTCTCACAAAATGGATTACAAGGCATTCATTTTGTGC

TCTGAAAATTGCAAATGATATCAGTTTCACTGTTAATGCAATGAAGCATCATGATGCTG  
AGGCCAATGCTGAAATCAAGTTATTGGATGAATGA  
>Medtr4g051642  
ATGGAAATTGAAATGCCTGTTGTGATTGTAGGTGCTGGGCCTGGTGGCTTAGCAACC  
TCAGCATGTCTTAACAAACATTCAATCTCAAACATTATCTTAG  
AGAAAGATGATTGTCATGCATCTCTTTGGAGGAAAAGAACCTATGACCGTTTGAAACT  
TCACATTGGTAAAAAGTTTTGTAACCTACCTCACTTACCTAT  
CCCATCTGATTTACCAAACCTTTGTTCCCTAGGGTTGATTTCCCTTCGTTATTTAGACAATTA  
TGTGAATCATTTTAAGATCTGTATTCCGGTACAACCGGTAT  
GTTGATGATGCATCTTTTGATGTCAAGAGTGGGAAATGGAGGGTTTGTGTGAGGGAT  
AATAGATTAAATATTGATGAGATTTATGTTGCTGATTATCTAG  
TGTTTGCAACTGGAGAAAACCTGTGATGAATATATTCCCATGATAAATGGGCTTGAAAG  
CTTTGAAGGTGAATACCTTCATAGTAGCAAATATCTTAATGG  
AAGGTCATGGTATGATAAGAATGTTTTAATTGTTGGAAGTGGAAATTCTGGCATGGAG  
ATTGCTTATGATGTCTCAAATTGGGGTGCAAATACCTCCATC  
GTTATAAGAAAGTCATGTAAGTTCCCCTCTATCTTCCAAAACAAATAAACACTCATCTCT  
CTCAGTAAAAAAAACAACATTCTAAAATATGTATATGGTTC  
CAAATTTAACTATATATTATCTTTGACCGATCTTTGTTTATATAATCTAACCCGTGAATTT  
GAGATTCTTTCTATTTTGATGACAGTCTAATTTTTTCA  
TAATTCTTTTACTCTATATTTTTTTCTACCATTATTGAGGGGCTGAAATAAAATAAAAT  
AGATAATTTTTCTGATGAAATTAAGTCTAGAAAAGTGAC  
ATAGAAGTTGAAGTATTTCAATTTTTTTTCAAACATGTTTAGGAGATTAAATAAGGCCT  
CCCACATAAAATTTGAATTTCCAATTAGAGACAAATTA  
TTATAAAATTTTGATCGAAATGTGCAAATTTACAATTTTGTCTGAGAAAGCATATACTC  
AGGGGTCAAATTTCCCTCCCCATTTTGTAGACATGTTTA  
AATTATCATTAGAACCCTCCACCATGAAATTTTGATGATTTTAAACGAGTGACAAATTAAT  
TATGAATTTTTAAAGAAATTCATAATTGTTGGGAACGAAA  
ATTCATAAATAATTATTCTCTCGTTTAAAGCTCCAAAATTTGTGATTAATGTTATTATG  
ATGTTATAAACTACTTGGAAAATTAACGAAAAAATTA  
GACTCGTGAATATATGCTTTCTTTGAACGAAATTGTGATTTTACACGTTTTGTTTGAAA  
ATTCAAATAAATTGAGGTACTTTCAGAATACTAAGAACT  
TTGGCGATCTTTTCTATGTATTTTTTAAAGAAGTTTGTACAAAATATCAGCTCAAATTT  
TGATTTCTAGGCTAAGGTTTTCGTTGTTTTGTTTTGAG  
TTTTATGTGGTTTAAATATCATAATTAATTTGTCCCTTGTTAAAAAATTATAGTTTTATTT  
GTGAGGCTCACTCTAACGCTCTAGACATGCCTCCAAAG  
AATCGTGAAAAAATTTGATCTCTAGTTCATTTTTCTAGACTTTATGCCTATAAAAAAAT  
GGTACATTTTTGCTTGATTTGAGCCCATTAATTGATGTTA  
GAAAAAATTGATGCAAAAAAATTGTGAGGCAAAAAAACC GCATCAGCAAAAAA  
AAAAAAAACATGCGGCAGCATCCACGTGGTAAGATTCTAT  
GTTATGTCAGTGTGTTTTGTGTGATTGAGCTTTTGAAGACCAAATTAATTAATTAGA  
AAGAATATCAAATTACGAAGGTAATCTGTGTTTTATTT  
GTATGGGGATCATTATAAACATCGTGCATATTACATGAATTATTTAACAATTAACCTCTT  
TTGTCACCAAATCAATTGTTTCTATCCGTTGAGAATAAA  
TATATGTTTGTATGTTCTTCAAAAAAATGATTTGATATGTTTCAGATGCATCCTCTTA

CAAAGAAATGGTGTTCGTGGGAATGTGTTTGATGAAAT  
ACTTAAGTGTAGAAAAGGTGGACAACTGTTGGTGTTTATGAGCAAAATGATGTATGG  
AGATATGTCTAAGTATGGTTTGATCAGACCAAAGGAAGGACC  
TTTCTCCATTAGAGTTAGGACGGGTCGTCCCCTAGCATTGATGTTGGTTGCATTA  
ATGATCAAGAAAGGCAAAGTAAAGGTATACACACTCTCTAAT  
CACTATTATAAGCAAAAATTAATTTTAGATTCATTCATTAATGATGTATGTGGTTTATAAT  
AAAGATCATATGCATCATTAAATTGAATAAATCTAAAAT  
GTAAATTTATATACGGAATCACGGTTTTTAATGTCAACCATCTAATCAACCGCCTCATCC  
ATGGAAACGTGTGAAATGTCTGCTTGTACAAAAGTTCAA  
TCGGTTAATTTTCTCATGTAATGTAAGTGTACTCAGGTGTATCCGACGATTTACGCATCAAAA  
GGCAAGATTGTTGAGTTTGTAGATGGAAAAAGTGGACAAT  
TTGATGTTATAGTCTTTGCTACTGGATATAGAAGCAATGTGTTGGAGTGGCTTAAGGT  
GCATTATTAATTAATTATATATATTATTGTATAATGACACCA  
AAATGTAGATTTGACACTATAACTAATTATAGTGTGTTTATGTTGAAAATATAATGCAGG  
ATTACAAAGAGTTGTTCAATGAGAATGGAATGCCTAAAG  
GCTGTTATCCAAATCACTGGAAAGGAGAAAATGGACTATACTGTGCATTCTCAAGAAG  
AGCATTACAAGGCATTGTTTATAGTTCACAGAAAATAGCAA  
TGATATTAGTCTCACTATAGATGCAAAGAAGCTGCTTGCTGAAGCTGTTGAGGTCAAT  
GCTCGTATCAAGTTATTAGATGAATGA

>Medtr5g033260

ATGCAAGAATTCACAGTTGTAATTGTAGGTGCTGGTCTTCTGGCCTTGCAATTTCTG  
CTTGCCTAACACAAAACCTCCATCTCTCATATCATACTCGAAA  
AAGATGATTGTTGTGCTTCTCTTTGGAGGAAAATGCATATGATCGTTTAAACCTTCAC  
TTGGCTAGTGAGTTTTGCTCTTTACCCCTCATGCCTCACCC  
ACCCTCAGGCCCAACCTACCTATCGAAATACCAATTCCTTCAATACATAGACAAATATG  
TCGCCCATTTCAACATAAAAATCTCACTATTGTCGCACAGTT  
GAGTCTGCTAAGTATGACGAGATTAGAAGCGAATGGAGGGTTGAAACAAAGAACACA  
ATAGAAGGGATATTGGAAGTTTATGAGGCGAAGTTTCTTGTGA  
TCGCCACCGGCGAAAATAGTGAAGGTTATATTCCTAATGTGCCTGGACTGAATAACTT  
TGAAGGAGAGGTGGTACACTCCAAAATACAAATCTGGTTC  
AAAATATAAAACAAAAGAGGTTTTGGTAGTTGGATGTGGTAACTCAGGAATGGAGATT  
GCTTATGACCTCCATAACTCGGGTGCTAACCCATCTATTGTG  
GTTCGAAGTCCGGTAAAGAATATTTCTAACTCACTATTTTTATGCAACAATATCATTTAG  
AATGAAAGAATTTAAATTTGTATCCCTAAAGATACATTTA  
AATTTCCATACATAGACAATTGAATTGTTTTTTGAGAGAACATAGACAATTGATTTATTT  
GTTTATTTATTTAATAATTTAATGACAAAATTAATTTTAT  
GAAATTCCTCGATAAGAATTTTTTTAATCTAGCAATGTCTGTATAATTTCTTGATTCAATG  
TGTTGATAATTCATTAATAGAATTTGAGCTATTTTTTC  
AATATATTTTTTTTGTGAGATTGTTTTAGACTTATCTAGTTAAACATCTATGACTTTCGA  
CATATCAATATTATATAATATTTTGGTGTGTTAACTATC  
TTTAAGGGTCTCTCTCAAAAAAAAAAACTATCTTTAAGGGTTTAGGGTGCTTCTAAC  
ATGGATTTAAAAAATGGTAAGTTTTAAAACGAGGACGAAT  
GTATTATTTTACTAAAATAATATAAGAGTTCATTTTAGAATAATTTTTTTCATCCATATTA  
AAATCATTCAAATGAAAAAGTGTGTAATAAGTGTCTA

TGTATTCTTTAGAAAGAGATCTCTTATTTCGATTTTCGACAATATATGTTTTGTGGTATTAA  
TTGTTTAATTTTTTTTTTTTAGTTTCATGTCTTCAATAGA  
GAAATAATTCACCAAGGGATGCGAATGGTAAAATTTTTTCGGTTGGTGTGTGGATA  
CTATCATTACTCTATGGGCAAACTAAAATATGGTGATTTGT  
CTAAGTATGGGATTTATCGTCCTAAATTGGGACCTTTCAATCTTAAGAATGTGACAGGA  
AAGTCTGCAGTTATTGATGTTGGAACCGTTGAAAAGATTAA  
GGAGGGGTCTATAAAGGTACTTGATTAGTACTACTTCATGATATTATTATTGTGAAA  
TTTTTTATTAATAATTAATTATAATCTGTTCAAATTACA  
GGTTGTTTCTTCATATATTACGAGAATTGAGAAAAAGAAAGTTGATTTGAAAACAACA  
TGAAAAAGAGTTTGATGCGATCGTTTTGCAACTGGCTAC  
AAAAGCATAGCTAATGGGTGGCTTAAGGTATATGTAATAAATCATAATCATAATTAATAAG  
ATAAAGGAAGGAAAAATTGATCATCTTCTCCCTTACAAT  
ATACAATTTACATTTACATACTTTAACTTTCAATTTATACTTTATTTTTCATACCCCTTCT  
AATTCTCTAAGTCAATATATTATTATTGATGATTTT  
TCAAAGGATTACAAATATGCTCTTAATGAGAAAGGGATGCCAAAAAATGCTTACCCGA  
GTCATTGGAAGGGGGATCATGGATTGACTGTGCAGGACTGG  
CAAGGAGAGGCTTGTCGGGAGTCAAATAGATGCAGAGTCAATTGCAGAGGACATC  
AACCAAATTTTAATTTTCATAATTA

>Medtr6g086870

ATGGCACATGATCATCAAAAGAAGGATAGCATGGGAAAATCAAGATTGGTTCATGGAC  
CAATTATAGTTGGAGCTGGTCCCTCAGGATTAGCAGCAGCAG  
CATGTCTTAAACAAAAAGGAATTCCAAGTCAAATCCTTGAAAGAGCTAATTGTTTAGCT  
TCAATGTGGCAACTCAAACCTTATGATAGATTAAGGCTTCA  
TCTTCAAAGCAATTTGTCAACTTCCTCTTATGCCATTTCCAAAAGGGTTACCATCAT  
ATCCAACAAAGCAACAATTTTATCTTACTTAAAGGCTTAT  
GCTGATCACTTTGATATAAATCCTATTTTTGGCAAACAAGTGGTGAATGCTGAATTTGA  
TGTGTTTTGTGGATTTTGAAGATTAAACTCAAGAAATTA  
TGAAAAATGGTGATGAAATTATTATTGAATATTTATGTAAATGGTTGATTGTTGCTAGTG  
GTGAAAATGCTGAGGAAGTTGTGCCTCAAATTGAAGGGAT  
GGAACAATTTCAAGGACCAATTTGCATACTAGTTTGTATAAGAGTGGTAGCATGTTTT  
GTGGCAAGAATGTTTTGGTGGTGGGGTGTGGAATTCAGGT  
ATGGAGGTTTGTTAGACCTTTGCAACCATAATGCTCATCCATCCTTAGTGGTTAGAG  
ATACGGTGAGTTTACTTAACTTTTATGATCTTCATTCTTCCA  
AACATCTTCAATCTTATACTTGAACCTACATAAAAATAAGTTGAAATAGCCACACAAATTT  
AGAGGCTGAAAATTTGAAATTTGTCTTITAGTTCGTGACTA  
AGTATTAGAGACATGAAATTTAACGAATAATTATTCGTAAATTTGATGTCTCAAATTTAT  
AATGTTATTTGAAATTTTTTGTAGTAGAGATAATATA  
TATATATATATATATATATATATATATATATATATATATATATATGCATAAAATAATATTGATTTTTTTCTTTCC  
GATTTTCAAGTTTTCTTTACTATATTATAAGTTT  
GAATCATTGATGGTCTTCAATGATTACTACTTTCTATTAGAAAACTAACTTATTATAATT  
TCTATTTAATATTTAGTTTGAACCTTATTTGATACTTA  
GTTTGAACCTTTATAAACCAGTCTAATTTAAAATGGACAATGTTAACAAATAAATGATA  
CAACTTTTGTAAAGTAAAATCAAATTTTAAAGTTTTTAAAC  
AAAATTTCTTTTTTAACTTCTTAACAAATCAACGGTTCGTATAACTAATTTCTTTTGTG

ACTTTTAAGATAAGTATTAAGTTTGGACTAAATACATTT  
ATTTTTTGTATATTAAAATGATAAGGAGTATACAAGATCAATTTATTTTTCAAATTGG  
AGTATATTTTATTTTTTTGAACTAGAGAAGAAGAAAA  
AATCTCAAAGAGTTTGTGCCATTGTTTGTCTCTCACTTTCATTGGAATCTGTTTGCA  
TGCGCCAAACAATGTCAGCATCTAAAATCTTAAAATCTCA  
AAATAAATAAATAATATCAAATCTTCTCTGCAAAGAACCTTTGTGTCAGTGTAECTA  
AAAGCATGAAAAAATAATTTCCATTAGTGTAATTACCCTA  
GTGTGTCTACAATTCCTAAAAGGTTGTTAAAGCAAAAAAATAATTCTTGAATCCA  
CTTTTTTTTTATTTTTTATTTTATTTTTGCAGGTGCATAT  
CTTGCCACAACAAATATTTGGGAAATCAACTTTTGGTTTATCTATGTGGTTGCTTAAAT  
GGTCTCTGTTCAATTTGTGGATAAATTTTTACTTCTAATG  
TCAGATCTTATTCTTGAGATACATCTCAATTTGGAATTGAAAGACCAAAAATTGGTCC  
TTTAGAGCTTAAGAACTTGACGGCAAGACACCTGTTTTGG  
ATGTTGGGACAGTAGCTCAAATCAAACCTGGAAAAATTAAGGTAACATTCTCTTACAT  
ACCAATCAAATCCAAAAGGGTTTTTTCATCTTATTATGTTTT  
CCTGTCTTTTTTTTTTTTTGAAAGAATTATGTTTTCTGTCTTAATCAACAAAAA  
ATCTATAAAATTAATGTGTTTTGATCTGCGGTGACAAAAG  
TTTATTTTAAATGAATTGATTATATAAAAGTGAGTTCAATATAAAATGATTTATGTTTATAT  
AACTTTTATATAAAAGTGAGTTGAATAGTAAACTAA  
GGTAAAAATCAATTTAGAGACAAATTTTTCAAATCTAGCTTCACATAAGAATTAATTAT  
GGAGATAAGATCAATTCAACTCGACAATATTCAAACCTG  
TCATAATCAATTTGGTCTCTTTTAAAAATATACTAAGATAAATAAAATCTATTTTTTTTTTC  
TTGGCGTTGTTTCATTGTTTCCATCATTATTTTTGTC  
TAATATCATCTAATATATGTGTAGGTTTGAAGGGAATTAACGACTAGCACATAATGCA  
GTGGAATTTGTTGATGGGAAAGTGGAGAACTTTGATGCAA  
TCATTCTAGCTACTGGTTACAGAAGCAATGTACCCTCTTGGTTAAAGGTGCTTCATTTA  
ACTCATACATATAGTTGATAAATATGGTAAATAGCATAGGA  
AATAATTGAATTAAGGACCAAAATTAGAGATAGAAAAATATAAATTATGTCATTAATCTTA  
GTAACAATAAAATTTGAGACATTCATTAATAAAAAAAAAAC  
TAGAGACATATTATTTCTTTTTGATAGAAGAGACATTTTTTTCTTGTTAATATTTTCTT  
ACTAAAAAATTTGAACTAAAATCAGACACAAAATATGA  
AATCCATCTTTAATTTTGTGTTAAGTGTGGGAGACCAATTTCAATTTTTTTCAATCCCT  
TTATTTTACAACAATGTTTTTTTTTTTTCTATCTCTATTT  
GGTTTACTATTCAACTCTTTTTTTGTAGTTGCTCTTATTCTTATTAGAAAAAATAATC  
CAAGTCTCGCATAAAATAAGGATAAGGTCTTAAACATGTT  
TATAGATATGACACTAGTCACCTTAAAAATCAATTTATAAAGATGAGTTAAACTCAATAT  
AAAATAATTTAATATTACACTCTATCAATTTGGGCAAC  
TTATAATTTATATCCACGCACCTAGTGTGATGTTGTATTATCAAAAACTCAAGTCTCACA  
TAAAATAAAGATAAGGTCTTAAATAGGTTTATAGATAGTG  
ACACTAGTCACCTTAAAAATTTTTATAATGATGAGTTAAACTCAATATAAACTAATT  
TAATATTACACTCTATCAATTTGGGCAACTTATAATTTA  
TATCCATGCACCTAGTTTGTGTTGATTGAAAAAATTCATTTCTCACACATGTCTAG  
GATAAAAACCTAATTATTCTTAAGTTTCAATATTATGATTT  
TTTTAATTTTTTAATTTTTGAAAAGTGTCTCAATATTTTGTAGCATGTTTAGAGTTTATAT

ATTGATTGGAATTGAAATTTATTGTGATTAGGGAAGTG  
ACATGTTTAGTGAGAAAGATGGTTTTCCAAGGAAACCATTCCCAAATGGATGGAAAG  
GTGAAAAGGGACTATATGCTGTTGGTTTTACTAAACGTGGTTT  
GCTTGGTTCATCTATTGATGCAAAGAGGATTGCAGAAGATATTGAAACTAGCTGGAAA  
TCTATTAAGCCAAGCCACTTGCATGAAATGATATCAAACAA  
ATGTTTTTTTAG  
>Medtr7g099160  
ATGGATATGGATCTGGACGAAGAACTATTTTGCTATACGAGAATGTACTIONAAAACCG  
CAAGGGCTAAAGCCGTAGAAAACCCTAACGATGATGATGTTG  
ATGTTTCGTCTCTTTTTTTGTGAAACTACGAAAGTTTTTCGACTTTCTTTTGATGAAATATT  
AATCTTGTTTGATTGATTTTGATATTTGGATGAGTTCT  
TGTTAGGTTATTGCCCAAATAATTTTTTTTTCTCTGTTGTTGTTATTGATTTTGTACACAT  
GATGAGTTGTTGTTATCTGATCTGCACTGTAGTTAGGAG  
AGTAGACCAGATGGAGGAGAGTTAGATCACTAGAGTCAGGGGTAGACTTAGAAAAAC  
TGAATTGGTTGATTCATGTAGTTAGGAAAGACATGAATGAGTT  
TGATTCATGTAGCCAACCCCACTTAGTGGGATAAGGCTTGGTTGTTGTTGGACGAGT  
TGTGTGTGTAATTTTTGAATTTTTGTTGGTTTATATGGATG  
ACTTGTTATTGTGTTGGAAATTTGGTATATATGGATAAGTTATTTTGTGGAAATTTTGT  
GTATTGTTTTGTACATATAGTTGAGTTGTTGTGTTGTC  
TATGGTTTTTGGAAATCTACAAGTTGTCTAGTTGAATTTGAAATTCGGTGTAATTTGTG  
GATTTTTTTTTGTTGCATATGGATCAGTGGTTGTTAAAAA  
TGTGTATAATTTTTGGTTTTTTTTTTTTTTTTGTGTGGTAAATATGGCTGAGTTGTT  
GGTTGTTTTGAAAATTAATGTATTTGGTGCTTGTGATT  
TTGAATCTCTGCAGAACCCTGTTAGACTGTGCTGGAGCTTTGCTAACTTACATAATGTT  
AAGGATTTTACCACATCAAAGGAGATGCTCGAAGGTGCTTA  
TTCTCTATGACCTAGTCCCCCTTTTTGAATGTTTTAGATGTGTGTTTTGATTAATTA  
AATGCTTTTTGGGCTGAGTTTGGACTTGTGTTTATACAAG  
GTTTTGTTTTACTTTTTAAGTTTTAACTCCCACAAGGCATAAAGCGTGATGAATGCG  
TAGGGGCCATATAATGATATGGGGTAATGGATCTTGTATGA  
AAAATTTACACACACACACACATATATATATATATATATATATATATATATATATCATGTG  
AACTGTGTTAGTTGTAATGACTCTCTTTTGATTTA  
ATAAGCATGCGGCTTCAACTATATAATGTATCAAGAGGATCTATTTGAATCCTGAAATA  
AATTTACCGCTGTTGATAAATTGAAGCCGTTGGATGATAA  
ATTGGACGTTTCAAATTTAAGTTTGAATTTGAGTCTGATTTGATATGGTTAGAATGC  
AAGTTGTTGATTGTTCTAATTCACCCGGTGCATTTACT  
CATCATATTTGACTGCAGCAAATCTGGTGGTTATTCTCAAACCTTCTGATTTGAACAT  
TCTTGTGTTTTGTGGATTTCTCACTTGAACCTTGATTTTCA  
GAGGCTGTTACAAAGTTAAGAAAGTTACTGAATTGAATCCCGACTTGCATCGCCCTT  
TTTGGGCCCTGGGAAAAACTCACTGCACAGGCAATATTAT  
TCTCAACCCGGGCCGAGGCTAAAGATCATTATGAGCTTGCATATGATTACTTTTTAAAA  
GCTGTTGAAAAGGTACAATCTTAGTTCAATATGATTGTATG  
TATCATTGAAGTGTGTGGGAAGTATTTAATTATTGACTTGTACAAATAATGTGTAACAT  
AGTGGTTTTTTGTTTTATGTAGAATCCTAAAAACAACTAT  
ACCGCATATCATTGCAAGAGGCTGCTAAGGTATGTTCTGTAATATAATGTTTTGTATTAA

TTTTTCATGCCGTTTTGATTACATTTTGCCATCTGTTTTGT  
TTTTGGAATTGTAATACCTCAGTGTAAATTTCAAATGACGTTTTTATTTGTTTCGTTTTG  
TCGACCCGGGCTTTTTTAAATCTTTTTCTTGTCGTTTTT  
GAGAAAATAAGATCTTTTTGGGTTGAGTTATTTGGTGTTCCTTATCAGGAGTTCAG  
TATAAGGTTAATCAATAAGCGTTCCTTTTAATTAAGATGACC  
CTGTCTTCAATTTTTCTTTCTTTTCATATAATAAATCTATGGTTAGAGAAGGGAAATGAC  
GATGTTACCTTTTCATTAGATTAGATCAGGTTTTGAATTT  
TTAAAATGTTAGTGTGCCTAGTCTTTTCAGTTCATGCTTTTACAAAGCTAGATATGTAA  
CACTTCAGATATTGTGCTGGGGTTTGTAAGCAGTTATGA  
TATCTGCAGACATGTATGTAAGAGACTGACTTGTCTTGTGACTGCCATGGTAGTTGTG  
TAATTGGATGAATATGATTAATTTAAATGTCAACTGCTATG  
GCAGAATCACATTTTGTGTGCAATTTCCACAGTTCCTTTCACAACCTGATATCAAACC  
CCCTGTTTTCATGTCCTTGTCTTTCCATACAGAACTGAAG  
AAAAATCATTAAAGTATTAAGATTCAATTGGTCTTCTATTAAGAGGCCCAACCTTGA  
AACCTTATTTCCCTTTAAAAAAAACATGCACTTTTTTTCCC  
CTCCTATTAAGAGGCCCGTCAGCTTCTGGTGGTACTGAGATACTAAGACAAAAGCTT  
TTGTTGTTTGTGTTGTTAATGAATTGTTTTTGCCTGAGACT  
TGTAATATAAGTTCAAATATTCATTTTCAGAAAGCACCAGGGAGAGGTCTTTTACTT  
CTGCTGGTTTTAAGTACTAAGACAAAATTCTGTTTTTTGG  
TTTTTTACCTTGCTATCATTTTCAATTGTTTCTATTTTTGTGATGAATGCAATGCATTTG  
TACTGTTTTCCAGTGACTTTTTTTTTTTGCTCATAGTAT  
ATGTTTCTTTGTTGCTAATGAATTGTTTTTGCCTAGACTTATTAATATAAGTTCGAATA  
TTCATTTTCAGCAATCAGCAGGGACAGCTGATCCTTCTT  
CTGCTGGTACTGAGGTACTAAGACAAAGTTCTGTTGTTTGTCTTTTACCTTGCTATCAT  
TTTTTTTTTGTGATAAATACAATACAATTGTGCAGTTTTTCC  
AGTGATTTTTTTTTGCTCTCATAGTATATGTTTTTTTTGTTGTTAATGAATTGTTTTTGCA  
ACAGACTTAGTAATATAAGTTCAAATATTCATTTTCAGA  
ATGTACCAGGGACATGTCCTTTTTCTTCTGCTGGTACTAAGGTACTAAGACAAAATTCT  
GTTTGTCTTTTACCTTGCTATCATCATTTTCTATTGTTTTT  
TTTTTGTTATAAATGCCATGCAATTTTACAGTGATTTTTTTTTTGTCTCTCATAGTATATGT  
TCTTTTGTAAATGAATTGTTTTTGCCTGAGACATAGTA  
AGTTAAGTTCAAATATTCATTTTTCAGCGATCAATAGGGACAGCTGGTCTTTCTTCTTCT  
GCTGGTACTGAGGTACTAAGACAAAATTCTGTTGTTTGT  
CCTTTACCTTGCTATCATTTTTTTTTTTTTTTTTGTGATCAGTGCAATCGATCATACAGT  
TTTCCAGTGATTTCTTTTTGCTCCTGTAGTATATGTTTTT  
TGTTGCTAATGAATTGTTTTTGCACAATTTAGTTCAATACAATTGAATTAATCTTTGAA  
GTTTGGGAAGTATTTAATTGTTGACTTGTAATAATTAATC  
TGTAACATAGTGGTTTTTATTTTATGTAGGATCCTTCAAACCTACCAGATGTTGACCC  
ATTGGATGGGGATGCTAAGGTATGTTCTGTAATATAATGGT  
GTGATTAGTTGTCATGCTGTTTTAATTACATTTTGCATCTGTTTTGTTTTGGAATTG  
TAAGACCTTAGTGAATATACAAATGACTTTTGTATTTG  
TTTGGTTTTCTCGACATGGGCTTTTTTTTTAAATCTATTTTCTTGTGATGGTTGAGGAAAC  
TAAGATCTTTTGGGGTTGGATTGCTCAACTTGTTTGAGCTA  
AGAGTTTTATTGTTTCGACTCACTTTTACATGAATGCATTCTAGACATAAACCCTTTACA

AAAGGGGGGGTTTGGTAGCTCAACTGGTTTGAGCCAAGGG  
TTTAAAGGACTTAAGGAGTTAAAAGTCCAAGGTTCAAGTCATGGCAAGGAGAAAATA  
ACATTACAATTAACATATTCACATTTGCTATTAACAAAAACA  
TGTATCACTTTACCTTAAACTCAGTTTTAGCTAGAATCAATTTACAAAATCAATTCTTG  
TCACCACACATACACTTAGTAACATAAGTTCAAATGTTCA  
TTTTAGATCTTTATTCCTCAGCTACTGTGTGTGTTTTAGATTGATATATGACAAGTGAAT  
TTGCCTTTTGGTGGAGTTGATAAATGCTTTTTTCTTTTCT  
TCATGAAATAAAGAACTAATCTTTGGTTTAGTCAGCTCCTGTGATCAATGCTTCTTCTG  
TCGAGTTTCTTGTTGAATCTTGGGCTTTTATTTATTTCTGA  
TAAATACATATAAGTGGGATTCTCTCAGCCCCACAAAATCACGATGTAGGGAAGATAT  
GTTAACATGCAGATATAAATTATGTTCTTCATGTTTAAAGCT  
GAGTTAGTTTTTACCTAATTTGGATATTTTTCAGATTTTGAAGAAGCTTAAAGACACAT  
GAAGTATGACATACTTGGATCGATATTACTGACGGTTGGC  
ATTGTTGCATGGGTGGTGTGCTTGCAAACAAGTGAAGTAATTTGTTTTGATTGATAC  
ATTGTAAGTGAAGTACACATCTAATTTGCACTGCCACATTGT  
TTATTTTACTTTTGGAGAAACGTGTTCCCTTCGTTCTTGACTGCTATGTTTTAACGTTTTA  
ACCATTTTTACCTATCCATCTTATGAAATTTTATCTTATT  
ATAATTGGGCCGAGTAGTTATAATGGTGGTATGTAGCTTGAAAATTGTTGTTGACCCTT  
CGCTTTTGGCTGAAAAATGCCTGAAAATGACTCAAATGACC  
CCATCAGCAGCTAACTGCTGTGGAATTTAACTGGCGGTAGTTAATTGCCGATCTTCAA  
TTCCATCCATCAGCGGTTAAGTGCCGTGGAGCATTGATAATG  
TGGAGAACATGCTTACCAACAGGTTTGTGAATCAATTGATCCTCCTGCTTCTCGATTG  
ATAAGCTACCTTGAAAATGCTAACAAATTTGAAATCAAC  
CCGCAATTCAACGAGTGTGTTCAATCTGCTAAGTATGATGAAACCAGTGGATTGTGGA  
GGGTCAAGACAAATGAAGTTGAGTATATTTGTAGGTGGCTTG  
TTGTTGCTACCGGCGAAAATGCTGAGTGTGTTACTCCTGAAATTGAAGGACTTTCTGA  
ATTCAAAGGTGAAGTTGTTTATGCTTGTGATTACAAGTCAGG  
GAAAAATTTTGAAGGAAAGAAAGTTCTTGTTGTTGGATGTGGAATTTCTGGAATGGAA  
CTCTCACTTGATCTTAGCAATCATCATGCTTTACCTTCCATG  
GTTGTTGCTAGCTCGGTAAGTTCCTTTTATGTGTCTGGTATATGTGTCAGTGCTTCATA  
GTAATCTTTTTTAACTTTTGTGAAAAAATCTAATTGGGC  
TGTTCTGTTTTTTTTATCCACAGGTTTCATGTGCTACCAAGAGAAATATTTGGAATATCAA  
CTTTTGAATTAGCGGTTATGATGTTGAAGTGGTTACCACT  
TTGGATTGTGGACAACTTTTGTGATTTTTCATGTTTGGGTGACATGGAA  
AAATATGGTATCAAAGACCATCAATGGGTCCATTGCAGTTG  
AAGAACACCGTAGGAAAGACACCGGTTTTGGACATTGGTGCCTTGGAGAAAATTAGA  
TCCGGTATATAAATGTTGTACCTGGAATCAAAGAATTAATA  
AAAATGGTGAAGTTGAGCTTGTTAATGGTAAAAGCTTGATATTGATGCAGTTGTTCT  
TGCTACTGGTTACCGCAGCAATGTCCCTTCTTGGCTTCAGGT  
GAATATATGTTCTAGATCATCTGTTTTTCTTTTTTAACTTTTCCACCACATAAAAAAATAA  
AAATACACTTTAGTAGTTGACTTAAATCCTGTTCTGGTC  
ACGCCGGTTAAATCTTATTTGTTGTTGGATTAATCTAACATCTGGACTGTTAGAATATTC  
CGACAACAAAGATTTACAGGATGACAGAAAAGACATGTA  
GAGGATTTAACTGTACAATGTCAAATTTTAACTTTTTTAAAGGCATGGTCCTATTTTAGA



AGCTTCTTTTTACTATTAATTATTATTATTTGTTAATGT  
GATCAAGGAACTAATTAATTTTGGTTATGTTATACAGGAAGGTGAATTTTTCTCAAAAAA  
TGGATACCCAAAGATGCCATTTCCACATGGTTGGAAGGGA  
AATTCAGGACTTTATGCTGTAGGGTTCACAAAGAGAGGGCTTTCTGGTGCTTCATCT  
GATGCTGTTAAAATTGCACAAGATATTGGAAAAGTTTGGAAAC  
AAGAGACAAAACAAAAGAAGCAACGCACTACTGCTTGTGCATAGACGTTGCATTTAC  
AATTCTAAACACACAAATGCTGCTTCTTTTTAGTCTCAGGAAT  
TTTTTGTGTATAAACAAAAAACAATAACAATATCTTGTAACAAAAAATACACATATACA  
AAAAACAGAAACAGATAGCACACATAAATATAGCCCTCT  
CCTAAGACCCAAGTTTTTTATGTGGTTGGTTAGTTTTTGAAAACCATAAGGATGATGAG  
GCT

>Medtr7g099330

CACATTATCAATTCTATAAACCAAACCTTCATCAAATTCTCTCTCAATCACAAAAAAAAA  
AAAAAACTATTCTCTGTTTCAATATTTCAACTCGTAACA  
CTTGAAAACCAATTTGAAACAAAATCATCAAAGAGAAAAACAATCTTCTCACTTCTT  
GATCAAACACAAATCATAAAATGGAAAATTTATTTCTGTCT  
AGCTGATCACCAAGACTTTCTCTCACGCCGTTGCATTTGGGTCAATGGACCTGTGAT  
CATAGGTGCAGGTCCATCTGGTCTTGCAACGGCAGCATGTCTT  
AGAGAACAAGGGGTACCCTTCGTTGTTCTCGAAAGAGCTGATTGCATAGCATCACTAT  
GGCAAAAAGAACCTACGCACAGATTGAAACTTCACCTTCCAA  
AACAACTGTCAACTACCTAACCTTCCAATGCCTGAAGATTTCCCTGAATACCCTTCA  
AAGAAACAATTCATAAGCTACCTTGAAAATGCTAACA  
ATTTGAAATCAACCCGCAATTCACGAGTGTGTTCAATCTGCTAAGTATGATGAAACC  
AGTGGATTGTGGAGGGTCAAGACAAATGAAGTTGAGTATATT  
TGAGGTGGCTTGTGTTGCTACCGGCGAAAATGCTGAGTGTGTTACTCCTGAAATT  
GAAGGACTTTCTGAATCAAAGGTGAAGTTGTTTATGCTTGTG  
ATTACAAGTCAGGGAAAAATTTGAAGGAAAGAAAGTTCTTGTTGTTGGATGTGGAAA  
TTCTGGAATGGAACCTCACTTGATCTTAGCAATCATCATGC  
TTTACCTTCCATGGTTGTTTCGTAGCTCGGTAAGTTCCTTTTATGTGTCTGGTATCTGTG  
TCAGTGCTTCATAGTAATCTTTTTTAACTTTTGTGAAAA  
AATCTAATTGGGCTGTTCTGTTTTTTTATCCACAGGTTTCATGTGCTACCAAGAGAAAT  
ATTTGGAATATCAACTTTTGAATTAGCGGTTATGATGTTGA  
AGTGGTTACCACTTTGGATTGTGGACAACTTTTGTGATTTTGACATGGTTCATTTTG  
GGTGACATGGAAAAATATGGTATCAAAGACCATCAATGGG  
TCCATTGCAGTTGAAGAACACCGTAGGAAAGACACCGGTTTTGGACATTGGTGCCCTT  
GGAGAAAATTAGATCCGGTGATATAAATGTTGTACCTGGAATC  
AAAAGAATTAATAAAAATGGTGAAGTTGAGCTTGTTAATGGTGAAGGCTTGATATTGA  
TGCAGTTGTTCTTGCTACTGGTTACCGCAGCAATGTCCCTT  
CTTGGCTTCAGGTGAATATATGTTCTAGATCATCTGTTTTTCTTTTTTAACTTTTCCACC  
ACATAAAAAAAAAAAAAAAAAAATACACTTTAGTGGTTGA  
CTTAAATCCTGTTCTGGTCACTCCGGTTAAATCTTATTTGTTGGATTAATCTAACATCTG  
GACTGTTAGAATATTCCGACAACAAAGATTTACCGGATG  
ACAGAAAAGACATGTAGAGGATTTAACTGTACAATGTCAAATTTTAACTTTTTTAAGG  
CATGGTCCTATTTTGAAGCTTCTTTTTTACCATTAATTAT

TATTATTTGTTAATGTGATCAAGGAACTAATTAATTTTGGTTATGTTATACAGGAAGGTG  
AATTTTTCTCAAAAAATGGATACCCAAAGATGCCATTTCC  
ACATGGTTGGAAGGAAATTCAGGACTTTATGCTGTAGGGTTCACAAAGAGAGGGCT  
TTCTGGTGCTTCATCTGATGCTGTTAAAATTGCACAAGATATT  
GGAAAAGTTTGGAAACAAGAGACAAAACAAAAGAAGCAACGCACTACTGCTTGTCAT  
AGACGTTGCATTTACAATTCTAAACACACAAATGCTGCTTCT  
TTTTAGTCTCAGGAATTTTTTGTCTATAAACAAAAACAATAACAATATCTTGTA  
AAAAATACACATATACAAAAACAGAAACAGATAGCACAC  
ATAAATATAGCCCTCTCCTAAGACCCAAGTTTTTTATGTGGTTGGTTAGTTTTT  
GAAAA  
CCATAAGGATGATGAGGCTCTTTCATTCTTTTCTTTTTTTA  
AACATTCCAATGTATTTCAATTTGGTTGATATATATGTAACACAGTATCATAATTCTTCAGT  
GATTAATAAATTAAGTTCAA

>Medtr8g432640

ATGCAAGAATTCACAGTTGTAATTGTAGGTGCTGGTCCTTCTGGCCTAGCAATTT  
CAG  
CTTGCCCTAACACAGAACTCCATCTCTCATATCATACTCGAAA  
AAGAAGATTGTTGTGCTTCTCTTTGGAGAAAAATGCTTATGATCGTTAAATCTTCAT  
TTGGCTAGTGAGTTTTGCTCTTTACCCCTCATGCCTCACCC  
ACCCTCAGGACCAACATACCTATCCAAAGACCAATTCTTCAATACATAGACAAATATG  
TCGAACATTTTAACATAAAACCTTGCTACTGTCGCATGGTT  
GAATCCGCTGAATACGATGAAGTTGGAAACAAATGGAGGGTTCAAACAAGAACACA  
CAAGACGACACATTGGAGGTTTATGTGTGCGAATTATCTTGTGA  
TTGCCACTGGTGAAAATAGTGAAGGTTATATTCCTAATGTGCCTGGACTAGGCAACTT  
CGAAGGAGAGGTGATGCACTCCAAATACTACAAATCTGGTTC  
AAAATACGAATCAAAAAATGTTTTGGTAGTTGGGTGTGGTAACTCAGGAATGGAGATT  
GCTTATGACCTCCACAATTGGGGTGCTAGCGCTTCCATTGTC  
ATTCGAAATCCGGTAATTTTTTTTTAACTTACTCTTTTAATAAACTAACAGTAACAAAAC  
ATAATCACTCACTTTTTGTACATTCATATGACACATGATG  
AATTACTTTAAACATGTCTCACATATGTATAATATCATTTAGATTGAAAGAACAACAATA  
GTTTTTTTTTTTTTTTTTATCACTTATTTTTATTTAT  
CCAATTAACACTCACTTCACTCACACAAAAATAGACTGAGTTAGACTCTATACTTTAA  
CTCCATTGCATCAATATTATTCGTGTGAAAGCATGAGTAA  
AATTTTACATAGGTGTATACAAATTAATTATATATATATATATATATATATATATATAT  
ATATATATATATATTCTAATGAAAAATAAGTGT  
GTATTGGGATATTAATTGTTTTTTTTTCGTAGCTGCATGTCTTCACTAGGGAAATGATTC  
ACCAAGGAATGCGTATGGTGAAGTATTTGCCGGTTCATAT  
TGTGGATACATACATTACTCTTTTGGCAAACTAAAATATGGTGATCTGTCTAAATATGG  
AATTTATCGTCCCAAAGAGGGACCTTTACATCTCAAAAAT  
ATTACAGGAAAGTCTGCCGTTATTGATGTTGGAACCATTGGAAAGATTAAGGAGGGTG  
CTATAAAGGTAAATTCATTTTTATACTTCATCCGGTCACATT  
TACAAGCAAAAAATATATTTTTTAGGTTCAATCAATATCTAATGTATTTGGTCTATATACA  
GACTAAATACATTTTATATTCAATGAATCTAAAAAGTA  
TTTTTTTTTTGTTTATAAATGTGACCAAATGAAGTATAATTTTTTTTTTTTTTATCAATATA  
ACGTTAAAGCACTAATATAAAATATTTTTGTGTTTGGGA  
TGTACCAGGTTGTTCTTCAAATATAACCAGAATTGAGAAGAAGAAAATTGTCTTTGAA

AACAATGTAGAAAGAGAGTTTGATGCAATTGTTTTGCTAC  
CGGCTATAAAAGTATAGCTAATGGATGGCTCAAGGTATAAAAGTTCTTATTCTTGATAG  
AAAATTAATGAACCAATCTTATTGGTAATTTGCAAATTAAT  
AAGATTATTGTTTGATATTTGCATTTTTGAAGGACTACAAATATGCTCTTAATGATAAAG  
GAATGCCTAAAAATGCTTTCCCAAACATTGGAAGGGGGA  
TCGTGGATTGTATTGTGGAGGACTTGCAAGGAGAGGCTTATGGGGAGTCAAAGTGG  
ATGCTGAATCAATTGCTCAAGACATCAACCAAATCTTAATCTA  
CATGATTAA

**Predicted coding sequence of AtYUCs, GmYUCs, and MedtrYUCs.**

>AtYUC1 (At4g32540)

ATGGAGTCTCATCCTCACAACAAAACACTGACCAGACCCAGCATATCATCCTCGTACACG  
GTCCCATCATCATCGGAGCTGGCCCTTCTGGTCTTGCCACTT  
CAGCATGTCTCTCGAGCCGTGGAGTCCCTTCTTTGATCCTAGAACGGTCGGATTCAA  
TAGCATCTCTATGAAATCTAAAACCTACGACCGACTCAGACT  
CCATCTCCCAAACACTTTTGCCGGTTACCCCTCCTGGACTTCCCTGAATATTACCCA  
AAATACCCTTCCAAAAACGAGTTCTTGGCCTACCTTGAGTCC  
TACGTTCCCACTTCCGCATCGCTCCAAGGTTCAACAAGAACGTACAAAACGCAGCT  
TACGATTCTTCCCGGTTTCTGGAGAGTAAAGACTCATGATA

ACACAGAGTACCTCTCCAAATGGCTTATCGTAGCCACCGGTGAGAACGCAGATCCAT  
ACTTCCCCGAGATTCCAGGGAGAAAAGAAGTTTTCCGGCGGAAA  
AATCGTTCACGCGAGTGAGTACAAAAGCGGCGAAGAGTTCGGGCGGCAGAAAAGTTT  
TGTTTGTGCGGATGTGGAAATTCGGGCATGGAAATTAGCTTAGAC  
CTCGTCCGACATAACGCATCTCCTCATCTTGTGTTGTCGGAACACCGTTCATGTGTTG  
CCAAGGGAGATACTTGGGGTATCAACATTTGGAGTTGGAATGA  
CACTTCTCAAATGCTTACCCTTAAGGCTCGTTGACAAGTTCTTGTATTGATGGCCAAT  
CTTTCGTTTGGAAATACCGACCGGTTGGGCCTTCGCCGACC  
AAAAACGGGTCCGCTTGAGCTGAAAAATGTCACCGGCAAAAAGTCCGGTTCTCGATG  
TCGGAGCTATGTCTCTCATCAGATCCGGCATGATTCAGATAATG  
GAAGGTGTAAAGGAAATAACAAAGAAAGGAGCAAAGTTTATGGATGGTCAAGAAAAG  
GACTTTGACTCTATCATATTTGCCACTGGTTACAAAAGCAACG  
TGCCTACTTGGCTTCAGGGAGGTGATTTTTTCACGGACGATGGGATGCCGAAAACGC  
CGTTTCCTAACGGCTGGAGAGGAGGGAAAGGATTGTACACAGT  
TGTTTTTACGAGAAGAGGACTCCTTGGAACGGCGTCTGACGCCGTTAAGATCGCTG  
GCGAAATTGGTGACCAGTGGAGAGACGAAATCAAGGGGTCCACC  
AGGAATATGTGCAGTTCTCGTTTTGTCTTTACCTCTAAATCCTAA

>Glyma.14G128200

ATGGGTCGTTCTTGCAACAAATCCCAACAACAACATGTTGAAGGCCCTATCATTATAG  
GTGCTGGTCCTTCGGGCTTAGCCGTGGCTGCGTGTCTCTCAG  
AAGATAAAGTTCCTTTTGTGATTCTTGAGAGACACAACCTGCATAGCCTCCCTTTGGCA  
AAACAAAACCTACGACCGTCTCAAACCTCCACCTCCCTAAACA  
GTTCTGCGAGCTTCCCTTGAAGGGCTTTCCCCACACTTTCCCAAATACCCACAAA  
GTACCAGTTTATCTCCTACATGGAGTCCTATGCTTCACACTTC  
AACATTCACCCCATCTTCAACCAAACTGTGAAAAGTGCTGAGTTTGATAAAGGGTCAA  
ATGTTTGGGTTGTTAGAAGTGAAGAGTTCGAGTATTCTTCTC  
GCTGGCTAGTGGTGGCCACTGGAGAAAATGCTGAACCTGTTGTGCCTAGGATTCATG  
GGATGGAGCTTTTTGGTGGTGTGTTGCTCACACTAGTGTGTA  
TAAGTCTGGCTCTGAGTATAGGAACAAGAAGTTTTGGTCATTGGGTGTGGCAATTC  
GGGTATGGAAGTTTGTGTTGGACCTTTGTAGACACAATGCCAAA  
CCTTACATGGTTGCTAGAAATACAGTACATGTGCTTCTAGGGAGATGTTAGGCTTCT  
CAACGTTTGGGATAGCTATGGCGCTCTATAAGTGGTTTTCCA  
TTAAGTTAGTAGACAAGATCATCTTGCTTGCAACAACTTAATCTTGGGCAACACCAAT  
CACTACGGCATCAAGAGGCCCAAAACCGGCCCAATAGAGCT  
CAAACCTCGCCACAGGGAAAACCTCCAGTCCTGGATGTGATGGAGGGTGTGAAGGAGA  
TAACAAGAAATGGTGCCAAATTTATGGATGGAAAAGAAAAGGAA  
TTCGATGCTATAATCTTGGCAACAGGATACAAGAGCAACGTGCCTACTTGGCTCAAG  
GGATGTGATTTTTTTACGAAAGATGGAATGCCGAAAACGCCCT  
TTCCTCATGGGTGGAAAGGAGAGCAGGGAATGTATACGGTGGGGTTCACAAGAAGA  
GGTCTTCACGGAACGTGCTGTGATGCAATCAAGATCGCTGAAGA  
CATAGCTGAACAGTGGAGAACCGTAGAGGACAAGAGTCACTGCGATTACATATCAT  
CCTACTCAATAATTCATAG

>Glyma.06G072100

ATGGAGTCCTTAAAGGCGCAAGAAGGAGGAGAGGAGCAAGTGAAGTGCCTGTGGG

TTCATGGCCCTATCATCGTAGGAGCAGGACCCTCAGGGCTAGCCG  
TCGCCGCGTGCCTCTCCCACCACGGAGTACCCTACGTCATTCTCGAGAGAACAAC  
TGCATAACCTCACTTTGGCAACACAGAACCTACGACCGCCTCAA  
ACTCCACCTCCCTAAACACTTCTGCGAACTCCCCTTAATACCCTTTCCCCTCCATTT  
CCAAAATACCCCTCCAACCTCTACGCTTCACGCTTCAACATC  
CGCCCCAGGTTCAACCAGTCCGTTACAGACCGCCAGTTCGACCCTTGTCTCAGCT  
TTGGGTCGTCAAACCAATGGTTTTAGTACATTTGCGCGTGGC  
TTGTGGTTGCTACTGGAGAGAATGCTGAACCCGTTGTTCCCTCGATTTCTGGCATGG  
ACAAGTTTCGCGGACCCATTGTTACACCAGCGTCTATAAATC  
TGTTCTGATTACAAGAACCAGAGGGTTTTGGTTCATTGGTTGCGGCAACTCGGGTAT  
GGAAGTTAGCTTGGATCTTGCAGGCACAACGCCAACCCCTTAC  
ATGTTGCAAGAAACACAGTACATGTTTTGCCTATGGAGATGTTTGGGTTTTCGACGT  
TTGGAATAGCTATGGCTCTCTGAAATGGCTTCCAATAAAGT  
TAGTAGACAAGTTGGTTTTGGCGGCGGCTAGGTTAATGTTGGGTGACACCGCTCGCT  
ATGGCGTTAGAAGGCCCAAACAGGGCCTATCGAGCTCAAAC  
AGTTACCGGGAAAACCCCTGTGCTTGATGTTGGACAAGTCGCTCAAATAAGATCCGG  
TAACATCAAGGTGATGGAAGGAGTGAAGGAGATAACAAGAAAC  
GGTGCCAAGTTTATGGATGGACAAGAAAAGGAGTTCAGCGCTATAATATTGGCGACG  
GGATACAAAAGCAACGTGCCCACTTGGCTTAAGAGTTGTGAAT  
CTTTCACGAAAGACGGAATGCCTAAAACGCCGTTTCCAATGGGTTGGAAGGGAGAG  
AACGGATTGTATACAGTGGGGTTCACGAGAAGAGGTCTTCTTGG  
AACTGCATCGGATGCCGTAATAATTGCTAAAGACATCGCTGATCAATGGATGACCGTT  
AAGGACAGATCATACTGTAATTCCCACATCATCTTCTCAAG  
AGTACATAG

>Glyma.17G205800

ATGGGTTCTTGCAACAAACCCCAACAACAACAACAACATGTTCAAGGCCCTATTA  
TCATAGGAGCTGGTCCCTCAGGCTTAGCCGTGGCTGCGTGTC  
TCTCAGAACACAAAGTTCCCTTTCGTAATTCTTGAGAGACACAACCTGCATAGCCTCCCT  
TTGGCAAAAACAAAACCTACGACCGTCTCAAACCTCCACCTCCC  
TAAACAGTTCTGCGAGCTTCCCTTAAAGGGTTTTCCCACACTTTCCCAAATACCCC  
ACAAAGTACCAGTTCATATCCTACATGGAGTCCACGCTTCA  
CACTTCAACATTCACCCTATCTTCAACCAAACCGTGGAAAGTGCTGACTTTGATAAAG  
GGTCGAAGGTTTGGGTGGTTAAACTCAAGAGGTTGATTATT  
CTTCTCGCTGGCTTGTGGTGGCTACTGGTGAATAATGCTGAACCTGTTGTGCCTAGGA  
TTCATGGGATGGAGCTTTTTAATGGTGTGTTGCTCACACTAG  
CGTGATAAGTCTGGCTCTGAGTATAGGAACAAGAAGTTTTGGTTCATTGGGTGTGG  
TAATTCGGGAATGGAAGTTTGGCTTGGACCTTTGTAGACACAAT  
GCCAAACCTTACATGGTTGCTAGAAATACAGTACATGTGCTTCCCTAGAGAGATGTTTG  
GCTTCTCAACATTTGGGTTGCTATGGCGCTCTATAAGTGGT  
TTCCCATTAAGTTAGTAGACAAGATCATCTTGGCTTGAACAACACTTCATTTTGGGCAAC  
ACCAATCACTATGGCATCAAGAGGCCCAAACCGGCCCAAT  
AGAGCTCAAACCTGCCACAGGGAAAACCCAGTCCTTGATGTTGGTCAAGTTGCAC  
AAATAAATGTGGTAACATAAAGGTGATGGAGGGTGTGAAGGAG  
ATAACAAGAAATGGTGCCAAATTTATGGATGGACAAGAAAAGGAATTCGATGCTATAAT

CTTGGCAACAGGATACAAGAGCAACGTGCCTACTTGGCTCA  
AGGGATGTGATTTTTTACCGAAGATGGAATGCCAAAACACCCTTTCCTCATGGGT  
GGAAAGGAGAGCAGGGATTGTATACGGTGGGGTTCACAAGAAG  
AGGTCTTCAAGGAACGTCGTGTGATGCAATCAAGATCGCTGAAGACATAGCTGAACA  
GTGGAGAACCGTAGAGGACAAGAGTCACTGCGATTACATATC  
ATCCTACTCAATAATTCATAG

>Medtr3g109520

ATGGACTATTGCATAAGAGAGTTAGAAGGAAAACAAGCTAATGATCCTTTATTCATCAA  
AACAAATGAAAAACAACAAATCATCATCAACGGAAGGTCGTG  
TCTTTGTTCAAGGACCGGTGATCGTAGGAGCAGGACCTTCTGGTTTAGCAGCAGCT  
GCATGTCTACAACAAAAAACATTCCATGTGTAATACTAGAAAG  
ATCTAATTGTGTGGCTTCATTATGGCAACTCAAAACCTACGATCGATTGCGTCTTCATC  
TTCCAAAACAATTCTGTGAATTACCCTTTATGGAATTCCCC  
TCAAATTTCCCAACATACCCTTCAAACAACAGTTCATAAAGTACTTGGAAGATTATGC  
AGGGAGTTTTGGTATTAGGCCACGGTTTAATGAGACAGTGC  
AAAATGCTGAATTTGATGGTAAAATTGGTTGTTGGAGGTTGAAGAGTTTTAATAGTAAA  
GCTGATGTAACAACAGAATATGTTTGTGCGTTGGTTGATCGT  
AGCGACCGGTGAGAATGCCGAAGCTGTTGTGCCTAATATTGAAGGCGTAGATGAATT  
TGGAGGAGTTATAAGGCATACAAGTTTGTATAAAAGTGGTGAA  
GAGTTTAGAGGGAAGAAAGTTTTGGTTGTTGGTTGTGGTAATTCTGGTATGGAAGTTT  
GTTTAGATCTTTGTAACCATGATGCTACTCCTTCTCTTGTTG  
TTCGAGATTCAGTACACGTCTACCACGAGAGATGCTAGGAAAATCAACTTTTGGGT  
GTCCATGTGGTTACTCAAGTGGTTTCCATTGGGACTTGTCGA  
TAGGTTCTTGCTCATAGTGTGATGGCTTATGCTTGGTGACACTGCTCAACTTGGGTTG  
GATCGTCCTCGTTTTGGGTCCCCTTCAACTCAAAAACCTCTCC  
GGAAAGACTCCTGTCTTAGATGTGGGTACCCTTGCCAAAATTAAGGTGGACACATTA  
AGGTACGGCCAAGCATAAAACGGTTAAAACGTCAAACAGTGG  
AATTCGTAGATGGAAGGTCAGAGAATTTTATGATGGCATCATCTTGGCAACCGGTTACAA  
AAGCAATGTTCCCTATTGGCTCAAGGAAGAGGATATGTTCTC  
TAAGGAAGATGGATTTCTATGAAGCCATTTCCAAGTGGGTGGAAAGGTAAAAATGGA  
CTCTATGCCGTAGGTTTTACAAAAGGGGACTGCAAGGTGCC  
TCTTTGGATGCCAAGAGAATAGCTGATGACATTGAACTGTGTTTAGAATCTGAAGCAA  
AGTATGGATCATAA

>AtYUC2(At4g13260)

ATGGAGTTTGTTACAGAAACGTTAGGCAAGAGAATCCATGATCCGTACGTGGAGGAA  
ACTAGGTGCTTAATGATTCCCGGACCAATCATTGTCCGTTCCG  
GGCCGTCGGGACTGGCCACAGCGGCATGTTTAAAGTCGAGAGACATCCCTAGTTTG  
ATTCTAGAACGTTCCACTTGCATAGCGTCACTATGGCAGCACAA  
AACATATGATCGTCTTCGACTTCATCTCCCTAAAGATTTCTGTGAGCTTCCATTGATGC  
CTTTTCTTCAAGCTACCCTACTTACCCTACAAAGCAACAG  
TTCGTCCAATACCTTGAGTCTTACGCCGAACATTTTACCTAAAGCCCGTTTTTAACC  
AGACCGTGGAGGAAGCCAAGTTCGATAGGCGGTGTGGGTTAT  
GGAGGGTGAGGACAACCGGAGGGAAGAAGGATGAGACAATGGAGTATGTATCACGG  
TGGCTTGTGTGGCGACCGGGGAGAATGCCGAGGAGGTGATGCC

GGAGATTGATGGAATCCCGGATTTTGGTGGACCTATCCTCCACACAAGCTCCTATAAG  
AGCGGTGAAATATTTAGTGAGAAGAAGATTTTGGTTGTAGGA  
TGTGGAAACTCCGGGATGGAAGTTTGTGTTAGACCTTTGCAACTTCAATGCTCTTCCTT  
CTCTTGTTGTTTCGTGACTCGGTACACGTATTACCTCAAGAAA  
TGCTAGGTATATCGACTTTTCGGGATATCCACGAGCCTGCTCAAGTGGTTTCCAGTGC  
ACGTGGTGGACCGTTCTTGTTACGTATGTCTCGGTTGGTTCT  
TGGTGCACGATCGGTTAGGGTTAGTTTCGACCAAACTTGGCCCTCTTGAACGCAA  
GATCAAATGCGGAAAGACTCCTGTTTTGGACGTTGGCACTCTT  
GCCAAAATCCGAAGTGGACACATCAAGGTGTATCCGGAGTTGAAACGGGTAATGCAT  
TATTCGGCAGAGTTTGTGATGGGAGAGTAGATAACTTCGACG  
CCATTATACTCGCCACGGGTTACAAAAGCAACGTACCCATGTGGCTAAAGGGAGTGA  
ACATGTTTTCTGAGAAAGATGGATTTCCGCATAAACCATTTC  
TAACGGTTGGAAAGGCGAAAGCGGATTGTATGCAGTCGGTTTCACAAAGCTTGGATT  
GCTTGGTGCAGCCATTGATGCCAAGAAGATCGCTGAGGATATT  
GAGGTTCAACGACATTTCTTACCATTGGCTCGTCTCAACATTGTAA

>Glyma.08G038600

ATGCTTAACATGGAGTACTTGAAGGAAGTGAAGGAAAAAGTGTCCATGATTATGTTG  
AGGTAAAGATGGGTAAAATGACAAAGCCAATAAGTGTGGCAG  
GACCAGTGATAGTGGGTGCTGGTCCATCAGGGCTTGCTGCAGCAGCATGTCTTAAA  
CAGAAAGGCATTCCAAGCTTAATCCTTGAAAGAGCTGATTGCTT  
AGCTTCAATGTGGCAGCTCAAGACTTATGACCGCCTGTGCCTTCATCTCCCTAAGCA  
ATTCTGCCAACTCCCTCTAATGCCATTCCCACAAAACCTTTCCC  
TCTTATCCAACCAACAACAATTCTTGGCCTATCTCAAAGCCTATGCTGACCATTTTGA  
TATAAAACCAGCTTTAAGCAAGACAGTGATCAGTGCCAATT  
TTGATCATGGATGTGGTACTGGAGGGTGAAGACTCAAGGTTTGA AAAAGGAGGAG  
ACAGAATATGTTTGTGAGTGGCTGATAGTAGCCACTGGAGAGAA  
TGCTGAAGAGGTTGTGCCTCAAATTGAAGGAATGAGTGAGTTTGAAGGGCCTATCTT  
ACACACCAGCTCATATAAAAGTGGTAGTATGTTTGGTGGGAAG  
AATGTTTTGGTTGTTGGATGTGGGAATTCAGGTATGGAAGTTTGGCTTAGATTTATGCAA  
CCATGATGCTCGCCATCCCTTGTGGTTAGAGATACGGTGC  
ATATCTTGCCTCAGCAGATGTTTGGGAAATCAACGTTTGGTTTATCTATGAGCTTGCTC  
AAGTGGTTCCCATGCGTCTCGTGGACAAATTTTACTTCT  
GATGTCACATCTCATTCTCGGGGACACAGCTCAATTTGGACTTAATCGTCCCAAAT  
GGCCCTCTAGAGCTCAAGAACTTGTGCGGCAAGACCCAGTT  
TTGGATGTAGGCACACTTGCTCACATAAAAAGTGGAAAAATTAAGGTTTGCCGCGGA  
ATTAACAACACTAGCAAAGCATAAGGTGGAATTTGTAGATGGAA  
AAACAGAGAATTTTCGATGTCATCATTATGGCAACTGGTTACAAAAGCAATGTACCCAC  
TTGGTTGAAGGGCAGCAACATGTTTTGTGAGAAGGATGGATT  
GCCCAGGAAAGATTTCCCAAATGGATGGAAAGGTGAAAATGGACTCTATGCCGTGGG  
TTTCTCTAAACGTGGCCTTCTTGGTGCATCTATTCAATCAAAG  
AGGACGGCAGAAGATATTGAACACTGTTGGAAAGCTGCTAATACCACGCGTGTGTAG

>Glyma.05G231100

ATGCTTTACATGGAGTACTTGAAGGAAGTGAAGGAAAACTGTGCATGATTATCTTG  
AGGTAAAGATGGGTAAAATGACAAAGCCAATAGGTGTGGAAG

GACCAGTGATAGTGGGTGCTGGTCCATCAGGGCTTGCTGCAGCAGCATGTCTTAAA  
CAGAAAGGCATTCCAAGCCTAATCCTTGAAAGGGATGATTGCTT  
GGCTTCAATGTGGCAGCTCAAGACTTATGACCGACTATGCCTTCATCTACCTAAGCAA  
TTCTGCCAACTCCCTCTAATGCCTTCCCCCAAACCTTTCCC  
TCTTATCCAACCAACAACAATTCTTGGCCTATCTCAAAGCCTATGCTGACCATTTTGA  
CATAAAACCAGCTTTAAGCAAGACTGTGATCAGTGCCAACT  
TTGATCATAGATGTGGGTACTGGAGGGTGAAGACTCAAGGTGTGAAAAAGGAGGAG  
ACAGAATATGTTTGTGAGTGGCTGATAGTAGCCACTGGAGAGAA  
TGCTGAAGAGGTTGTGCCTCAAATTGAAGGAATGAGTGAGTTTGAAGGGCCTATCTT  
ACACACTAGCTCATATAAGAGTGGTAGTATGTTTTGTGGGAAG  
AATGTTTTGGTGGTTGGATGTGGTAATTCAGGCATGGAAGTTTGTTTAGATCTCTGCA  
ACCATCATGCTCGCCCATCCCTTGTGGTTAGAGATACAGTGC  
ATATCTTGCCACAGCAGATGTTTGGGAAATCAACTTTTGGTTTATCTCTGAGCTTGCT  
CAACTGGTTCCTCATGCGTCTTGTGGACAAATTTTACTTCT  
TATGTCACATCTCATTCTCGGGGACACAGCTCAATTTGACTTAATCGTCCCAAAT  
GGCCCTCTAGAGCTCAAGAACTTGTGTGGCAAGACCCAGTT  
TTAGATTTTGGCACACTTGCTCACATAAAAAGTGGAAAAATTAAGGTTTGCCGCGGAA  
TTAAACAACCTAGCACAACACAAGGCTGAGTTTGTAGATGGAA  
AAATAGAGGATTTTCGATGTGATCATTCTAGCAACTGGATACAAAAGTAACGTACCCAC  
ATGGTTGAAGGGCAGTGACATGTTTTGTGAGAAGGATGGATT  
GCCCAGGAAACCTTTCCCAAATGGATGGAGAGGTGAAAATGGACTCTATGCTGTGG  
GTTTCACTAAACGTGGCCTTCTTGGTGCATCTTTTGTGCAAAG  
AGGATTGCAGGAGATATTGAACATTGTTGGAAAGCTGCTAATTA

>Glyma.07G086200

ATGGACTACTTGAAGGAACTAGAAGGAAAAAGTGTCCATGATTGTTATCACCAGCACC  
AGATAAAGATGAGTAAATGGCAAGCCCTATATTTGTTCTG  
GACCAGTTATAGTGGGAGCTGGTCCCTCAGGGCTAGCTGCAGCAGCTTGCCTTAAA  
CAGAAAGGCATTCCAAGCCTAGTCCTTGAAAGAGCTCAATGCTT  
AGCTTCAATGTGGCAGTTCAAGACTTATGACCGCCTCAGGCTTCATCTCCCAAAGCA  
ATTCTGCCAGCTCCCTCTCATGCCATTTCCCAAACCTTGCCT  
TCTTATCCCACAAAACAGCAATTCTTGGCCTACCTTAAGGCCTATGCTGACCACTTTG  
ACATAAAACCTGTCTTCAGCCAGACTGTGGTCAGTGCTGAAT  
TTGATCATGTGTGTCATCATTGGAGGGTCAAGACTCAAGGAGTACTCAAGAAAGAGG  
ACACAGCAGAATATGTTTGCCAATGGCTTATAGTTGCTACTGG  
AGAGTGCGCTGAGGAAGTAGTGCCTCAAATTGAAGGGATGGGAGAGTTTGAAGGGC  
AGATTGTACACACTTGCAAGTATAAGAGTGGAACAAGTTTTGT  
GGGAAGAATGTTTTGGTGGTTGGTTGTGGGAATTCAGGCATGGAGGTTTGTGGAT  
CTCTGCAACCACAATGCTCGCCCTCCCTAGTGGTTTCGAGATA  
CGGTGCATATCTTGCCACAACAGATGCTAGGGAAATCAACTTTTGGTTTATCCATGTT  
CTTGCTCAAGTGGTTCCCTATACGTTTTGTGGATCAATTTT  
GCTTCTAATGTCACATCTCATGCTTGGAGACACAGATCAATTTGACTTCGCCGTCCA  
AACTTGGTCTCTAGAGCTCAAGAACTTGTACGGAAAGACA  
CCAGTTTTGGATGTTGGGACACTCACTCAGATCAAAAATGGAAAAATTAAGGTTTGCC  
GGGAATTAACGACTAGCACGCAATGCGGTGGAGTTTGTG



ATGGAAAAGTAGAGAACTTTGATGCCATCATTCTAGCAACTGGTTACAAAAGCAATGT  
ACCCTCTTGGTTAAAGGGCAGTGACATGTTTAGTGAGAAAGA  
TGGGTTTCCCGGAAGCCATTCCCAAATGGATGGAAAGGTGAAAATGGACTCTATGC  
GGTGGGTTTCACCAAACGTGGCCTGCTTGGTGCATCTATTGAT  
GCAAAGAGGATTGCTGAAGATATTGAACATAGCTGGAAAGCTGAGGCCACGCATGTT  
TTGGAGTTCCCTTGTCCACTTGCGTGA

>Glyma.09G190700

ATGGACTACTTGAAGGAACTAGAAGGAAAAAGTGTCCATGATTGTTATCACCATCACC  
AGCAGCAGCAGATAAAGATGAGTAAAATGGCAAGCCCTATAT  
TTGTTCCGGGACCAGTTATAGTAGGAGCTGGTCCCTCAGGGCTAGCTGCAGCAGCT  
TGCCTTAAACAGAAAGGCATCATTCCAAGCCTCATCCTTGAAAG  
AGCTCAATGCTTAGCTTCAATGTGGCAGTTCAAGACTTATGATCGCCTCAGGCTTCAT  
CTCCCAAAGCAATTCTGCCAGCTCCCTCTCATGCCATTCCCC  
AAAACTTGCTTCTTATCCACAAAACAGCAATTCTTGGCCTACCTTAAGGCCTATG  
CTGACCACTTTGACATAAAACCTGTCTTCAGCCAGACTGTGG  
TCAGTGCTGAATTTGATCATGTGTGTCAGCTTTGGAGGGTCAAGACTCGAGGAGTAA  
TCAAGAAAGAGGACACAGCAGAATATGTTTGCCAATGGCTTAT  
AGTTGCTACTGGAGAGTGTGCTGAGGAAGTAGTGCCTCAAATTGAAGGGATGGGAG  
AGTTTGAAGGGCAGATTGTACACACTAGCAAGTATAAGAGTGGA  
AGCATGTTTTGTGGGAAGAATGTTTTGGTGGTTGGTTGTGGGAATTCAGGCATGGAG  
GTTTTTTGGATCTCTGCAACCATAATGCTCGTCTTCCCTAG  
TGTTAGAGACACGGTGCATATCTTGCCTCAACAGATGCTAGGGAAATCAACTTTTGG  
TTTATCCATGTTCTTGCTCAAGTGGTTCCCCATACGTTTTGT  
GGATCAATTTTTGCTTCTAATGTCACATCTCATGCTTGGAGACACAGCTCAATTTGGA  
CTTCGTCGTCCAAAACCTGGTCCTCTAGAGCTCAAGAACTTG  
TACGGAAAGACACCAGTTTTGGATGTTGGGACACTCACTCAGATCAAAAATGGAAAA  
ATTAAGTTTGCCGGGGAATTAACGACTAGCACGCAATGCAG  
TGGAGTTTGTTGATGGAAAAGTAGAGAACTTTGATGCTATGGTTCTAGCAACTGGTTA  
CAAAGCAATGTACCCTCTTGGTTAAAGGGTAGTGACATGTT  
TAGTAAAAAGATGGATTTCCCGGAAGCCATTCCCAAATGGATGGAAAGGTGAAAA  
TGGACTCTATGCGGTGGGTTTCACCAAACGTGGCCTTCTTGGT  
GCATCTATTGATGCAAAGAGGATTGCTGAAGATATTGAACATAGCTGGAAAGCTGAGG  
CCAAGCATGTTTTGGAGTTCCCTCGTCCACTTGCGTGA

>AtYUC3(At1g04610)

ATGTATGGAAATAATAACAAGAAGTCTATCAACATCACGAGTATGTTTCAAACCTCAT  
CCCCGAAGGCAGCGACATTTTCTCCCGGCGTTGCATCTGGG  
TCAATGGACCCGTCATCGTCCGAGCTGGCCATCAGGTCTAGCCGTTGCTGCGGGC  
TTGAAACGTGAAGGGGTACCATTATAATCCTCGAGCGAGCTAA  
CTGCATTGCTTCATTATGGCAAACAGAACCTACGATCGTCTCAAACCTCCATCTACCT  
AAACAGTTTTGCCAATTACCAATTATCCTTTCCCGGACGAG  
TTCCCTGAGTACCCTACCAAGTTTCAGTTTATTAGTACCTTGAGTCTACGCAGCCA  
ACTTTGACATCAACCCTAAGTTCAACGAGACAGTCCAGTCCG  
CTAAATATGATGAGACGTTCCGGGCTGTGGCGGGTTAAGACCATTTCAAACATGGGTC  
AGCTCGGTTCTTGCAGTTTGAGTATATATGCAGATGGATTGT

GGTGGCAACGGGAGAGAACGCTGAGAAAGTTGTGCCGGATTTTGAAGGTCTAGAGG  
ATTTTGGCGGCGATGTTCTCCATGCTGGTGAATAAATCCGGTGGAAAGGTACCAAG  
GGAAAAAGGTTTTGGTGGTGGGATGTGGAAACTCCGGTATGGAAGTCTCTCTCGATC  
TCTACAATCACGGAGCAAACCCATCGATGGTCGTTTCGTAGCGCTGTTTCATGTTTTACC  
AAGAGAGATTTTTGGGAAATCAACGTTTGAATTAGGAGTTACGATGATGAAGTATATGC  
CCGTTTGGCTCGC

GGACAAGACTATACTCTTTCTGGCGAGGATTATCTTGGGGAATACCGATAAATACGGT  
CTAAAAGGCCGAAAATTGGACCGTTAGAGCTAAAGAACAAG  
GAAGGCAAAACTCCGGTCTTGACATCGGAGCGTTACCCAAAATCAGATCGGGAAAG  
ATCAAATCGTCCCCGGAATCATAAAGTTCGGCAAAGGCAAAGTTGAGCTAATAGATG  
GCCGTGTTCTTGAGATTGATTCCGTTATTCTAGCTACTGGATACAGAAGCAACGTCCC  
TTCATGGCTTAAGGACAACGACTTCTT

CTCCGATGATGGGATACCAAAAACCCGTTTCCAAACGGATGGAAAGGAGAGGCGG  
GATTGTATGCGGTAGGGTTCACGAGAAAAGGATTGTTTGGTGCCTCGCTTGATGCTA  
TGAGTGTGGCTCATGATATTGCTAATAGGTGGAAAGAAGAGTCTAAGCAACAGAAGA  
AAACTGCTGCTGCTCGTCATCGTCGTTGTA

TTTCACATTTCTAA

>Glyma.10G128700

ATGCATGACATATGTCTGAACATGCCACCAATGGTTCAAACCTTCGACCCAGAGGAC  
CTGTTCAAAGGCGTTGCATATGGGTGAACGGACCCGTTATAG  
TAGGTGCTGGCCCTTCAGGTCTTGCAGTGGCAGCATGCCTCAAAGAGCAAGGTGTT  
CCATTCTTAATCCTCGAGAGAGCAAACCTGCATTGCCTCTCTTTG  
GCAAAACCGCACCTACGATCGCTTAAAGCTTCATCTCCAAAACAGTTTTGTCAATTA  
CCAAACTTCCCTTTCCCTGAGGACTTCCCTGAATACCCACACA

AAGTTTCAGTTCATAAGCTACCTTGAAAGCTATGCAAAGCACTTCAACATTTCCCCAC  
AGTTCAATGAAACAGTGCAGTCTGCAAAGTATGATGAGACCT  
TTGGCCTCTGGAGGGTCAAACCATCAGGAAGATCAAGAAGTTAGGAGAAGCCTCTT  
CAGGTTGTTGTGGTGTGTTGAGTGTGAAGTTGAGTACATTTGCAGGTGGCTTGTCG  
TCGCCACCGGCGAAAACCTCGGAGAAAGTGGTGCCTGAGTTTGAAGGGTTGGGAGA  
GTTTGGTGGCCATGTTATGCATGCTTGTGACTATAAATCTGGGGAGGGATATGGTGG  
GCAAAAAGTGCTTGTTGTTGGGTGTGGAAATTCAGGCATGGAGGTCTCACTGGATCT

TTGTAACCACAATGCTAACCCATCAATGGTGGTTAGAAGCTCAGTTCATGTGTTGCCA  
AGAGAAGCTTTTGGGAAATCTACCTTTGAGCTTGCTGTGATGTTAATGAAACGGTTTC  
C

TCTATGGATGGTTGATAAGATATTGCTGGTTCTGGCACGTTTGATTTTGGGGAATGTT  
GAAAAGTATGGTCTAAAAGGCCCTTCAGTGGGTCCCTTTGGAG  
CTCAAGCACACTGCAGGGAAGACCCCTGTGTTGGACATTGGGGCCCTTGAGAAAAT  
TAGATCTGGCAAATCAAAGTGGTTCCTGGAATCAGAAGGTTCT  
TCCCAGGGAAAGTTGAACTTGTGATGGCCAAGTTCTTCAGATTGATTCTGTGGTTCT  
TGCAACTGGGTATCACAGCAATGTACCATCATGGTTGAAGGA

GAATGATTTTTTACCAGTATGGGACTCCAAGGAACCCATTTCAAATGGGTGGAG  
AGGCAAAGGTGGTCTTTATGCTGTAGGGTTCACAAGGAAAGGT  
CTTTCTGGTGCATCATTGGATGCAATTAATGTGGCTCATGACATTGCCAAGAATTGGA  
AAGAGGAAAACAAACAGAAGAGGAAAACAGTGGCTGCACGCCACAGGAGATGCATA

TCACACTTCTAA

>AtYUC4(At5g11320)

ATGGGCACTTGTAGAGAATCAGAACCTACTCAAATCTTCGTTCCCTGGTCCGATCATCG  
TCGGAGCCGGGCTTCCGGTCTAGCCGTAGCGGCTTGTTTGT  
CAAACCGAGGCGTACCATCGGTTATCCTCGAGAGAACCGATTGTTTAGCTTCTTTATG  
GCAAAAAGAACCTACGACCGTCTCAAACCTCCATCTCCCTAA  
ACACTTTTTCGAGCTTCCTCTTATGCCTTTCCCTAAAACTTCCCCAAATACCCATCC  
AAGCAACTATTCATCTCCTACGTTGAGTCTACGCTGCCCGG  
TTTAATATCAAACCGGTATTTAACCAAACCGTCGAGAAAGCAGAGTTCGATGACGCAT  
CTGGTCTATGGAATGTGAAGACGCAAGACGGTGTATACACAT  
CCACGTGGCTGGTGGTTGCCACAGGGGAAAACGCTGAACCGGTGTTTCCGAACATA  
CCCGGTTTAAAGAAGTTTACTGGACCGGTTGTTACACACCAGTGC  
GTACAAGTCCGGTTCGGCATTTCGCAAACCGGAAGGTTTTGGTGGTTGGTTGTGGAA  
ATTCCGGTATGGAGGTCAGCTTGGATCTTTGTAGATACAATGCT  
CTGCCTCATATGGTCGTTAGAACTCTGTACATGTATTACCAAGAGACTTTTTTGGTCT  
ATCAACATTTGGAATAGCCATGACACTACTGAAATGGTTTC  
CTCTAAAGCTGGTGGACAAATTTCTCCTACTTCTTGCTAATTCTACGTTGGGCAATAC  
CGACCTTTTAGGCCCTTCGACGACCTAAGACCGGACCAATTGA  
GCTAAAGAACGTCACCGGTAAAACCTCCCGTTCTTGATGTCGGTGCCATTTCTTTAATC  
CGATCAGGACAAATTAAGTGACGCAAGCCGTGAAAGAAATA  
ACGAGGAACGGGGCAAAGTTTCTGAATGGGAAAGAAATTGAATTGACTCCATAATAT  
TAGCGACTGGGTATAAGAGTAATGTACCCGATTGGCTTAAGG  
AGAATAGTTTTTTCACAAAAGAAGGAATGCCAAAACGCCGTTTCCTAACGGATGGAA  
AGGAGAGAAGGGACTATACACGGTGGGTTTCACGAGAAGAGG  
ACTTTCGGGAACAGCCTATGACGCCGTTAAGATCGCTGAGGATATAACAGACCAATG  
GATGAAATTTAACGGTCCGTTGAGTTGTAGGAATATTTGTAGT  
TCCCATATTATTCATCTTCATTTCAATAAATCCTAA

>Glyma.04G070100 □

ATGGAGTCCTTAAAGGGTGAAGAAGTAAAGTGCGTGTGGGTTTCAGGGCCCTATCATC  
GTAGGAGCAGGACCCTCAGGGCTAGCCGTGGCCGCGTGCCTCT  
CCCACCATGGAGTGCCCTACGTCATTCTCGAGAGGAGCCACTGCATCACCTCCCTCT  
GGCAACACAGAACCTACGACCGTCTCAAACCTCCACCTCCCAA  
ACACTTCTGCGAACTCCCCCTGATGCCCTTCCCCCTCCATTTCCCAAATACCCCTC  
CAAGAACCAGTTCATCTCCTACCTCAACTCCTACGCTTCTCGC  
TTCAACATCCGCCCCAGGTTCAACCAATCCGTTTCAGACCGCCGAGTTTCGACCCTTCT  
TCTCAGCTTTGGCTCGTCAGAACCAACGGTTTTTCAGTACATTT  
CCCCGTGGCTCGTCGTTGCTACCGGAGAGAATGCTGAGCCTGTTGTTCCCTCCATTT  
CTGGCATGGACATGTTTCACGGTCCCATTGTTACACACCAGCGT  
CTACAAATCTGGTTCTGATTACAATAACCAGAGGGTCTTGGTCATTGGCTGCGGCAAC  
TCCGGTATGGAAGTTAGCTTGGATCTTTGCCGCCACAACGCC  
AACCCTTACATGGTTGCAAGAAACACAGTACATGTTTTGCCTAGAGAGATGTTTGGGT  
TTTTGACGTTTGAATAGCTATGGCTCTCTTGAATGGCTTC  
CAATAAAGGTAGTAGACAAGTTGGTTTTGGCGGCGGCTAGGTTAATGTTGGGTGACA  
CCGCTCGTTATGGCGTTAGGAGGCCCAAACGGGGCCTATAGA

GCTCAAAGTACGTAACCGGGAAAACCCCTGTGCTTGATGTTGGACAAGTGGCTCAAAT  
AAGATCCGGTAACATAAAGGTGATGGAAGGTGTGAAGGAGATA  
ACAAGAAATGGTGCCAAGTTTATGGATGGACAAGAAAAGGAGTTCAGCGCTATAATAT  
TGGCAACGGGATACAAAAGCAACGTGCCCACTTGGCTTAAGA  
GCTGTGAATCTTTCACCAAAGACCGAATGCCGAAAACCTCCGTTTCCAATGGGTTGGA  
AGGGAGAGAACGGATTATATACAGTGGGGTTCACGAGAAGAGG  
TCTTCTTGGAACTGCATCAGATGCCGTAATAATTGCTAAAGACATCGCTGATCAATGG  
ATGACCGTTAAGGACAAATCATACCGTAATCCCACATCATC  
TTGCTCAAGAGTACATAG

>AtYUC5(At5g43890)

ATGGAGAACATGTTTAGGCTCATGGGAAGTGAAGATTCCTCCGACAGAAGACGGTGC  
ATTTGGGTAAACGGTCCTGTAATCGTCGGAGCCGGGCCATCGG  
GGCTAGCCACGGCAGCCTGCCTCCGCGAGGAAGGTGTTCCCTTTGTGGTATTGGAG  
AGAGCAGATTGCATAGCTTCACTATGGCAAAAACGAACTTACGA  
TAGAATCAAACCTTCATTTACCAAAGAAAGTTTGTCAATTACCCAAAATGCCCTTCCCGG  
AAGACTACCCGGAATATCCAACAAAACGACAGTTCATCGAG  
TACCTTGAGTCCTACGCAAACAAATTCGAAATTACTCCTCAGTTCAACGAGTGTGTCC  
AGTCTGCTCGATACGACGAGACAAGTGGTCTCTGGCGCATCA  
AGACAACATCTTCTCTTCTCGGGGTCGGAGATGGAATATATCTGCCGGTGGTTAG  
TGGTGGCGACGGGAGAAAACGCGGAGAAAGTTGTTCCAGAGAT  
CGATGGGCTCACAACGGAGTTTGAAGGCGAGGTGATCCACTCGTGTGAGTACAAAT  
CCGGCGAGAAATACAGAGGAAAGAGTGTCTTGTCTCGTCCGATGT  
GGAAACTCCGGCATGGAAGTCTCTTGTATCTCGCAAATCACAATGCTAATGCATCCA  
TGTTTGTTCGTAGCTCGGTTTCATGTGTTACCAAGAGAGATTT  
TAGGCAAATCTAGTTTTGAAATCTCCATGATGTTGATGAAGTGGTTTTCTCTGTGGCT  
AGTAGACAAGATTCTACTGATTCTTGCATGGCTGATTTTAGG  
AAATTTGACAAAGTATGGCCTAAAGAGGCCACGATGGGCCCAATGGAGCTCAAGAT  
TGTTTCAGGTAAGACTCCAGTTCTAGACATCGGAGCTATGGAG  
AAAATCAAATCCGGTGAAGTAGAAATCGTCCCGGGAATTAACGGTTCTCTCGTAGTC  
ACGTGGAGCTAGTAGACGGTCAGAGATTAGATCTCGATGCGG  
TGTTTCTGGCCACGGGTACCGTAGCAACGTCCCATCATGGCTCCAAGAAAATGATC  
TGTTTTCGAAAACGGGTTCGCGAAATCGCCGTTTCCAACGC  
GTGGAAAGGGAAATCGGGACTTTACGCGGCTGGATTCAAGGAAAGGATTGGCTG  
GAGCATCAGCAGACGCCGTTAACATCGCTCAAGATATTGGAAAC  
GTGTGGAGAGAAGAAACCAAACGACAGAAAATGAGAACACGAGTGGGTCACCGCAG  
ATGCATTTCAAGTTGCTTAG

>Glyma.19G170800

ATGGAGAACTTGTTGCGCCTAGTAGACCACGAAGACTTCTTCTCTCGTTCGTTGCATTT  
GGGTGAATGGCCCTATAATCATAGGGGCAGGACCCTCAGGGC  
TAGCCACAGCAGCATGCCTTAGAGAACAAGGGGTACCCTTCATGGTTCTCGAACGTG  
CAGATTGCATAGCCTCACTGTGGCAAAAACGAACTTACGACAG  
ACTCAAACCTCACCTTCCAAAACAATTCTGCCAGCTCCCGAAAACCTACCCTTCCCTGAA  
GACTTCCCTGAATACCCCAAAAAGAAACAGTTTCATTGAGTAC  
TTAGAATCATATGCTAAGCACTTCGAGATCAATCCTCAGTTCAACGAGTGTGTGCAGT

CCGCAAGGTACGATGAGACAAGCGGCTTGTGGCGGGTTAAGA  
CCGTTTCTTCGAGTGGCGCCGCCGCCCGCGGCGAGATTGAGTACATTTGCAGGTGG  
CTCGTGGTGGCCACCGGGGAGAATGCGGAGTGTGTTATGCCGA  
TATTGAAGGTTGAGTGAGTTCAAAGGTGATGTGATCCATGCTTGTGATTACAAGTCA  
GGGAGAGCTTCAGGGGAAAGAAGTTCTTGTGTTGGTTGT  
GGCAATTCGGGCATGGAACCTCACTTGACCTTTGCAACCACCATGCCTCTCCATCC  
ATGTTTGTTCGTAGCTCGGTTACGTGTTGCCTAGAGAAGTGT  
TTGGGATATCAACTTTTGAATTGGCAGTTATGTTGCTGCAATGGCTGCCCTTTGGCT  
TGTTGACAAGATTCTCTTGATCTTGGCATGGTTTGTGGG  
GAACATTGAGAAGTTGGGGCTCAAAGGCCTTCAATGGGTCCTTTGGAGCTTAAGAA  
CACAAAGGGGAAGACCCAGTTTTGGATATTGGTGCCTTGGAG  
AAGATTAGATCCGGTGACATAGAAGTTGTGCCAGGAATCAAGAGGTTCAACAATGGG  
GAAGTTGAGTTTGTAAATGGTGAAAAGCTTGATATTGATGCAA  
TAGTGCTTGCAACCGGTTACCGCAGCAATGTCCCTTCTTGGCTTCAGGAAGGTGAAT  
TTTTCTCAAAGAATGGATACCCAAAGATGCCATTCCCTCACAG  
TTGGAAGGGAAATGCTGGGCTTTATGCTGTGGGGTTCACAAAGAGAGGGCTCTCTG  
GTGCTTCTTCTGATGCTGTGAAAATTGCTCAAGATATTGGCAA  
GTTTGGAAAATGAGACTAAGCAAAGAAACAGCGCACTACCGCTTGTGCATAGACGT  
TGCATTTACAGTTCTAA

>AtYUC6(At5g25620)

ATGGAAGGTAAACTAGCACATGACCACCGCGGCATGACGTCACCGCGTCGTATCTGC  
GTCGTCACCGGTCCGGTGATCGTAGGCGCCGGACCGTCGGGAC  
TAGCCACGGCAGCATGTTTAAAAGAGAGAGGTATCACGTCCGTACTIONACTAGAGAGAT  
CAAACGTATAGCATCACTATGGCAGCTCAAGACTTATGACCG  
TCTTCATCTTCACCTTCCCTAAACAATTCTGTGAACTTCCGATTATACCCTTCCCCGGAG  
ATTTCCCTACCTACCCGACGAAGCAACAGTTCATCGAGTAC  
CTTGAGGACTACGCTCGGAGGTTTACATAAAGCCGGAGTTTAAACCAAACGGTTGAG  
TCGGCTGCGTTTGTGAAAACCTTGGGATGTGGCGCGTACTA  
GCGTGGGAGAAGAAGGCACGACGGAGTATGTTTGTGCGGTGGTTAGTGGCGGCGAC  
GGGGGAGAATGCGGAGCCGGTGGTACCTAGGTTTGGAGGGATGGA  
TAAGTTTGCAGCCGCCGGGTAGTTAAGCACACGTGTCATTATAAAACCGGTGGAGA  
TTTCGCCGGAAAAAGGGTTCTTGTGTCGTCGGATGTGGAAACTCC  
GGTATGGAGGTTTGTGGATCTCTGCAACTTCGGTGCTCAGCCTTCTCTCGTTGTC  
AGAGACGCTGTGCACGTCCTACCACGAGAGATGTTGGGTACTT  
CAACTTTTGGGCTGTCCATGTTCTTACTGAAATGGCTGCCCATCCGGCTTGTGACC  
GTTTCCTTTTGGTTGTTTCCCGGTTTCATCCTCGGGGATACTAC  
CCTTTTAGGTCTTAAACAGGCCCGGTTAGGTCCACTCGAGCTCAAAAATATCTCCGG  
TAAACTCCGGTTCTCGACGTTGGCAGCTAGCCAAAATCAA  
ACCGGAGACATTAAGGTGTGTTCCGGGATAAGAAGGTTAAAACGACATGAAGTTGAG  
TTCGATAACGGAAAACAGAGAGATTTGACGCCATTATATTAG  
CAACTGGCTACAAAAGCAACGTACCCTCTTGGCTAAAGGAGAATAAAATGTTTAGTAA  
GAAAGATGGATTTCCAATACAAGAGTTCCCTGAGGGATGGAG  
AGGGGAATGTGGGCTATACGCGGTCGGATTCACAAAACGTGGGATTAGTGGAGCAT  
CAATGGATGCAAAGAGAATAGCTGAAGACATACACAAGTGTGG

AAACAAGACGAGCAACTGCAATGCAAATTGGGGAAAAGAATGAAAAGGAAATTTAGT  
GAGAGTGATTGTGGTGGGAATT

>Glyma.14G141200

ATGGACTATTGCTTGAGAGAGCTAGAAGGAAAGCAAGCACATGACTCTCTATTCCTAG  
AGAAAATGAAGAATTCATTATCACAACGTACTIONACTAGTG  
AGAGATGTGTGGGTGCCAGGGCCAGTGATTGTGGGAGCAGGGCCTTCAGGGCT  
TGCAACAGCAGCATATCTCAAAGAGAAAGGAGTGCCAAGCCTAAT  
CTTAGAAAGATCCAACCTGCATAGCATCCTTGTGGCAACTCAAGACCTATGATAGGCTC  
CACCTTCACTTGCCAAAGAATTTTTGCGAACTTCCCTTGATG  
GGGTTTTCTTGTGACTTCCCCACATACCCTACAAAGCAGCAGTTCATAGAGTACTTG  
GAGAGCTATGCTGAGAGGTTTCACATTAGGCCAAGGTTTAATG  
AGACGGTCCAGCACGCGGAGTTTGACGCCACGCTCGGGTTTTGGAGGGTGAAGAG  
CTTGAACAAGAGGGGAGGTGGCAACAGAGTTTGTGTGCAGGTGGCT  
GATTGTGGCCACTGGGGAGAATGCAGAGGCTGTGGTGCCTGGTATTGAAGGAATGG  
GGGAGTTTGGTGGGACCATAAAGCACACAAGTTTGTATAAGAGT  
GGGGAAGAGTTTAGAGGGGAAGAGGGTGTGGTTGTTGGGTGTGGGAATTCAGGGAT  
GGAAGTCTGCTTGGATCTTTGCAACCATAATGCTACTCCTTCTC  
TTGTGGTCAGAGATACTGTACATATCTTACCACGAGAGATGCTGGGAAAATCAACTTT  
TGGGTTGTCCATGTGGTTGCTCAAGTGGCTGCCCATTCGGTT  
TGTGGATCGGTTCTTCTCATAGTGTGATGGCTCATGCTTGGTGACACGGCTCGGTT  
CGGATTGGACCGGCCGAAATTGGGTCCCCTTCAGCTCAAAAAC  
CTGTCCGAAAGACACCAGTGCTAGATGTGGGTACCCTTGCCAAGATCAAAAGTGG  
ACATATAAAGGTACGGCCTGGCATCAAGCGCTTAAAACGTTATA  
CTGTTGAATTTGTTGATGGAAGGACAGAGAATTTTATGATGCCCTCATATTGGCAACTGG  
TTACAAAAGTAATGTGCCCTATTGGCTAAAGGAAGAGGATAT  
GTTCTCTAAGGAAGATGGGTTCCCTACGAAGCCATTTCCAAATGGATGGAAGGGTGA  
GAATGGGCTCTATGCAGTTGGTTTCACCAAGCGTGGACTACTT  
GGTGCATCAATGGATGCCAAGAGAATAGCTGAGGATATTGAAAGGTGTTGGAAAGCA  
AAGCATAGTACTTCTTTTTCTCTCTCACTTAATGTGCCACAAT  
CCAATTCATGA

>Glyma.04G079700

ATGGAATATTTCTTGAGAGAAATAGAAGGAAAGCAAGCACACGACCCGTTGTTTATGA  
ACAACAACAAGTCATCATTGTCGTCATCGTCGTCATCATCTT  
TTTCCACCGTGTGGGTTTATGGGCCTGTGATAGTAGGAGCCGGGCCTTCAGGACTC  
GCAGCAGCAGCATGTCTCAGGGAGAAAAGTGTCCAAGCGTGAT  
ACTAGAGCGATCCAATTGCATAGCATCTCTATGGCAGCTCAAAACCTATGATCGCCTA  
CGCCTTCATCTTCAAAGCAATTCTGCGAGCTTCCCTTCATG  
GGGTTCCCTTCTCACTTCCAACATACCCTTCAAAGCAACAGTTTGTACAGTACTTGG  
AGAATTACGCGGAGAGGTTCCGGATTAGGCCGAGGTTCAATG  
AGACGGTGCAGCATGCGGAGTTTATGCGAAACTCGGGTTGTGGCGGGTGAAGAG  
CGTCGACAAGGCGGAGAAGACGACGGAGTACGTGTGCCGGTGGCT  
GATCGTGGCCACCGGAGAGAATGCGGAGGCGGTGGTGCCGGATATAGAAGGGGTG  
GAGGAATTTGGCGCTCCTATAAAACACACGAGCTTGTATAAGAGT  
GGGGAAGAGTTCAGAGGGGAAGAGGGTTTTGGTTGTGGGGTGTGGGAATTCGGGGA

TGGAAGTGTGCTTAGATCTTTGCAACCATAATGCTACTCCTTCTC  
TTGTGGTTAGAGACACAGTACACGTCTTACCACGAGAGATGCTGGGAAAATCAACT  
TCGGGTTGTCCATGTGGTTGCTTAAGTGGTTACCCATCCGACT  
TGTGGATCGATTCTTGCTAATGGTGTGCTGGCTTCTGCTCGGTGACACTTCTAAATTA  
GGATTGGATAGGCCGCGTTTGGGTCCCTTAGAACTCAAAAAC  
CTTTCAGGAAAACCCCTGTGCTAGATGTGGGTACCCTTGCCAAGATTAAGGTGGA  
GACATTAAGGTACGTCCAGGCATTAAGCGGCTTAAACGTCAA  
CTGTGGAATTTGTGGATGGAAGGACAGAGAATTTTGATGCAATCATATTGGCAACTGG  
TTACAAAAGCAATGTACCCTATTGGCTTAAGGAAGAAGATAT  
GTTCTCTAAGAAAGATGGGTACCCTAGGAGGCCATTTCCAAATGGGTGGAAAGGTAG  
AATGGGCTCTATGCTGTTGGTTTTACCAAAAAGGGTCTACTT  
GGTGCATCCATGGATGCAAAGAGAATAGCTGAAGACATTGAACAGAGTTGGAAAGCT  
GGGGCAAATCATAGAACTACTTTTGCTCGTTCACACTTGCCGC  
AACCAAATTCATAA

>Glyma.17G189700

ATGGACTATTGCTTGAGAGAGCTAGAAGGAAAGCAAGCACATGACCCTCTATTCCTAC  
AGAAAATGAAGAATTCATCATCACAAAGCACTACTACTAGTA  
GTGAGAGATGTGTGTGGGTGCCAGGGCCAGTGATTGTGGGAGCAGGGCCTTCAGG  
GCTTGCAACAGCAGCATATCTCAAAGAAAAGGATTGCCAAGCCT  
AATCCTAGAGAGATCCAACCTGCATAGCATCCTTGTGGCAGCTCAAGACCTATGATAGG  
CTTCACCTTCACTTGCCAAAAAACTTCTGTCAACTCCCCTTG  
ATGGGGTCCCTTGTGATTTCCCTACATACCCTACAAAGCAACAGTTCATAGAGTACT  
TGGAGAGCTATGCTGAGAGCTTTGACATTAGGCCAAGTTCA  
ATGAGACGGTCCGCGCGCCGAATTCGACGCCACGCTCGGCTTCTGGAGGGTGAA  
GAGCTTCAACAAGAAGGAGGTAGCAACAGAGTTTGTGTGTAGGTG  
GTTGATTGTGGCCACTGGGGAGAATGCAGAGGCTGAGGTGCCTGAGATTGAGGGAA  
TGGGAGAGTTTGGTGGGGCCATAAAGCACACAAGTTTTTATAAG  
AGTGGGGAAGAGTTTAGAGGGAAGAGGGTGTGGTGGTTGGGTGTGGGAATTCAG  
GGATGGAAGTGTGTTTGGATCTTTGCAACCATAATGCTACTCCTT  
CTCTTGTGGTCAGAGATACAGTACATATCTTACCACGAGAGATGCTGGGAAAATCAAC  
TTTTGGGTTGTCCATGTGGTTGCTCAAGTGGCTCCCTATCCG  
GTTTGTGGATTGTTTCTTCTCATAGTGTGCTGCTGCTTGGTGACACGGCTCG  
GTTCCGATTGGACCGGCCAAAATTGGGTCCCCTTCAGCTTAAA  
AACTTGTCCGAAAGACACCAGTGCTAGATGTGGGTACCCTTGCCAAGATCAAAAGT  
GGACACATAAAGGTAAGACCTGGCATCAAGCGGTAAAACGAT  
ATACAGTTGAATTTGTTGGTGGAAAGGACAGAGAATTTTGATGCTATCATATTGGCAACT  
GGTTACAAAAGTAATGTGCCCTATTGGCTAAAGGAAGATGA  
TATGTTCTCTAAGGAAGATGGGTTCCCTACGAAGCCATTCCCAGATGGATGGAAGGG  
TGAGAATGGGCTCTATGCAGTTGGTTTACCAAACGTGGACTA  
CTTGGTGCATCAATGGATGCCGAGAGAATAGGTGAAGATATTGAAAGGTGTTGGAAG  
GAAAAGCATAGTAGCACTTCTTTTTCTCTCACTTAATGTGC  
CACAATCCAATTCATGA

>Glyma.06G081300

ATGGAATATTTCTTGAGAGAAATAGAAGGAAAGCAAGCACATGACCCGTTGTTTCATGA

ACAATTACAACAAGTCGTCGTCATCGTCATCGTCGTTTTTCGT  
CATCATCTTCTTCCACCGTGTGGGTTTCATGGGCCTGTGATAGTAGGAGCCGGGCCTT  
CAGGGCTGGCAGCAGCAGCATGTCTGAGGGACAAAAGTGTCCC  
AAGCGTGATACTAGAGCGATCCAATTGCATAGCATCTCCATGGCAGCTCAAAACCTAT  
GATCGCTTACGCCTTACCTTCCAAAGCAATTCTGCGAGCTT  
CCCTTCATGGGGTTCCTTCTCACTTCCCAAATTACCCTTCAAAGCAACAGTTTGTAC  
AGTACTTGGAGAATTACGCGGAGAGTTTTGGGATTAGGCCGA  
GGTTCAATGAGACGGTGCAGCATGCGGAGTTTGACGGCAAACCTCGGCTTGTGGCG  
GGTGAAGAGCGTGGACAAGGTGGGAAGACGACGGAGTACATGTG  
CCGGTGGCTGATCGTGGCCACCGGAGAGAATGCGGAGGCGGTGGTGCCGGATATC  
GAAGGGGTGGAGGAGTTTGGCGCTCCTATAAAACACACAAGCTTG  
TATAAGAGTGGGAAGAGTTCAGAGGGAAGAGGGTTTTGGTGGTGGGGTGTGGGA  
ATTCGGGGATGGAAGTGTGCTTAGATCTTTGCAACCATAATGCTA  
CTCCTTCTCTTGTGGTTAGAGACACAGTACACGTCTACCACGAGAGATGCTGGGAA  
AATCAACTTTCGGGTTGTCCATGTGGTTGCTCAAGTGGTTACC  
CATGCGACTTGTGATCGATTCTTGCTAATGGTGTGATGGCTTCTGCTTGGTGACACT  
TCTCATTTGGGATTGGATAGGCCTCGTTTGGGTCCCTTAGAA  
CTCAAAAACCTTTCAGGAAAACCCCTGTGCTAGATGTGGGTACCCTTGCCAAGATT  
AAAGGTGGAGACATTAAGGTACGTCCAGCCATTAAGCGACTTA  
AACGTCACACTGTGGAATTCGTGGATGGAAGGACAGAGAATTATGATGCAATCATATT  
GGCAACTGGTTACAAAAGCAATGTGCCCTATTGGCTTAAGGA  
AGAAGATATGTTCTCTAAGAAAGATGGGTACCCTAGGAGGCCATTTCAAATGGGAG  
GAAAGGTAGAAATGGGCTCTATGCGGTTGGTTTTACCAAAAAG  
GGTCTACTAGGTGCGTCCATGGATGCAAAGAGAATAGCCGAAGACATTGAACAGTGT  
TGGGAAACTGGGGCAAATCATAGAACTACTCTTGCTCCTTCAC  
ACTTGCCGCAACCAAATTCATAA

>AtYUC7(At2g33230)

ATGTGTAATAACAATAACACAAGTTGTGTCAACATCTCAAGTATGCTTCAGCCTGAGG  
ACATTTTCTCCCGTCGTTGCATCTGGGTGAATGGGCCTGTCA  
TCGTCGGTGCTGGCCCATCAGGCCTAGCTGTGCGCCGCCGACCTGAAACGCCAAGA  
AGTTCCGTTTGTAACTCGAGCGAGCTAACTGCATAGCTTCTCT  
GTGGCAAACAGAACCTATGATCGTCTCAAGCTTCATCTCCCAAAGCAATTCTGTCAA  
TTACCCAATTTACCCTTCCCCGAGGATATCCCGGAGTATCCA  
ACGAAGTACCAGTTTATTGAGTACCTTGAGTCTACGCTACCCACTTTGATCTCCGCC  
CCAAGTTCAATGAGACGGTCCAATCAGCTAAATATGACAAGA  
GGTTTGGGCTGTGGCGGGTCCAGACTGTTTTGAGAAGCGAGCTGCTCGGTTATTGT  
GAGTTCGAGTATATATGCAGGTGGCTCGTGGTGGCGACGGGAGA  
GAATGCTGAGAAAGTGGTGCCGGAGTTTGAAGGTTTAGAAGATTTTGGTGGTGTATGT  
TCTTCACGCTGGAGATTATAAATCCGGCGAGAGGTACCGCGGA  
AAACGAGTTCTCGTAGTTGGATGTGGAAACTCAGGCATGGAAGTCTCTCTTGATCTAT  
GCAATCATGATGCGAGCCCATCAATGGTTCGTTTGAAGCTCCG  
TTCATGTATTACCGAGAGAAGTTCTTGGGAAGTCGACGTTTCGAGTTAAGTGTAACAAT  
GATGAAATGGATGCCGGTTTGGCTCGTGGACAAGACTCTTCT  
CGTTCTACAAGTTACTTCTAGGGAACACCGATAAGTATGGGCTCAAGAGGCCTGA



AATTGGACCGTTAGAGCTGAAGAACACCGCAGGTAAAACCTCCC  
GTGCTAGACATCGGAGCCATTTCAATGATCAAATCAGGAAAGATCAAATCGTAGCGG  
GAATAGCTAAGTTTGGTCCGGGAAAGGTGCGAACTCGTGGATG  
GTCGAGTTCTGCAGATTGATTCAGTGATTCTTGCCACTGGTTACAGAAGCAATGTCC  
CTTCATGGCTTAAGGAAAACGACTTGGGTGAGATTGGGATAGA  
GAAAAACCCATTTCCAAAAGGGTGGAAAGGGAAGGCTGGATTGTATGCGGTGGGAT  
TCACCGGAAGAGGACTCTCAGGTGCATCGTTTCGATGCAATGAGT  
GTAGCTCATGACATTGCCAATAGCTGGAAAGAAGAACTAAGCAACAGATCAAACCTG  
TCGCTACTCGCCACCGTCGTTGTATTTACACTTTTTGA

>Glyma.20G080000

ATGCATGACATATGTCTGAACATGCCACCAATGGTTCAAACCTTCGACCCAGAGGAC  
CTCTTCACAAGGCGCTGCATATGGGTGAACGGACCCGTGATAG  
TAGGTGCTGGCCCTTCAGGTCTTGCAAGTGGCAGCATGCCTCAAAGACCAAGGTGTT  
CCCTTCATAATCCTCGAGAGAGCAAACCTGCATTGCCTCTCTCTG  
GCAAACCGCACCTACGATCGCCTCAAGCTTCATCTCCCAAACAGTTTTGCCAGCT  
ACCAAACGTCCCTTTCCCTGAGGACTTCCCTGAATACCCACA  
AAGTTTCAGTTCATAAGCTACCTTGAAAGCTATGCCAAGCACTTCAGCATAGCCCCAC  
AGTTCAATGAAACAGTGCAGTCTGCAAAGTACGATGAGACCT  
TTGGCCTGTGGAGGATCAAGACCATCAGGAAGATCAAGAAATTAGGAGGACTCTCTT  
CAGGTGGTTGTGCTGAGTGTGAGGTTGAGTACATTTGCAGGTC  
GCTTGTGGTCGCCACCGGGGAAACTCGGAGAAAGTGGTGCCTGAGTTTGAAGGG  
TTGGGAGAGTTTGGTGGCCATGTTATGCATGCCTGTGATTATAAA  
TCTGGGGAAGGTTATGGTGGACAAAAGTGCTTGTGTTGGGTGTGGAAATTCAGG  
CATGGAGGTCTCACTTGATCTTTGTAACCACAATGCTAACCCAT  
CATTGGTTGTTAGAAGCTCAGTTCATGTGTTGCCAAGAGAAGTTTTTGGGAAATCTAC  
CTTTGAGCTTGCTGTGACGTTGATGAAACGGTTTTCTCTTTG  
GATAGTTGATAAGATATTGCTGATTCTGGCACGTTTGATTTTGGGGAATGTTGAAAAGT  
ATGGTCTCAAAGGCCCTCAGTGGGTCTTTGGAACCTCAAG  
CACACTGCAGGGAAGACCCCTGTGTTGGACATTGGGGCCCTTGAGAAAATTAGATCT  
GGCAAATCAAAGTGGTTCCTGGAATCAGAAGGTTCTTGCCAG  
GGAAAGTTGAACTTGTGATGGCCAAGTCTTCAGATTGATTCTGTAGTTCTTGCCAC  
TGGGTATCACAGCAATGTACCATCATGGTTGAAGGAGGATGA  
TTTTTTTACCAATGATGGAACCTCAAAGAAACCCATTTCCAAATGGGTGGAGAGGCAAA  
GGTGGTCTTTATGCTGTTGGGTTCAAGGAGAGGCCTCTCC  
GGTGCATCTTTGGATGCAATTAATGTGGCTCATGACATTGTCAAGAGTTGGAAAGAG  
GAAACCAAACAGAAGAGGAAAACAGTGGCTGCACGCCACAGGAGATGCATATCACA  
CTTCTAA

>AtYUC8(At4g28720)

ATGGAGAATATGTTTCGTTTGATGGATCAAGATCAGGATTTAACTAATAACCGGTGCAT  
TTGGGTCAACGGACCGGTCATCGTCCGAGCTGGACCGTCCG  
GGTTAGCGACGGCGGCTTGTCTCCATGAACAAAACGTTCCCTTTCGTTGTTCTCGAGA  
GAGCAGATTGTATTGCTTCTCTATGGCAAAAACGTACTIONACGA  
TCGTCTCAAGCTTACCTTCCTAAGCAGTTTTGTCAATTACCGAAAATGCCCTTCCCT  
GAGGACTTCCCGGAGTACCCGACGAAGCGTCAGTTCATCGAC

TACCTTGAGTCTTACGCTACCCGGTTCGAGATCAACCCTAAGTTCAACGAGTGTGTG  
CAGACTGCTCGGTTTCGATGAGACCAGTGGCTTGTGGCGAGTCA  
AGACCGTGTCTGAAGAGTGAGTCGACTCAGACCGAGGTCGAGTATATTTGCCGGTGG  
CTTGTGGTGGCTACGGGAGAAAATGCGGAGAGAGTGATGCCGGA  
GATTGATGGTCTTTCTGAGTTTTCCGGTGAGGTGATTCACGCTTGTGATTACAAGTCC  
GGCGAGAAATTCGCCGGGAAAAAAGTTCTCGTCGTTGGTTGT  
GGAAACTCCGGCATGGAAGTTTCTCTTGACCTAGCAAACCATTTTCGCTAAGCCTTCC  
ATGGTCGTGAGAAGCTCTCTTACGTGATGCCGAGGGAAGTAA  
TGGGTAAATCAACGTTTGAGCTTGAATGAAGATGTTAAGATGGTTTCCTCTATGGT  
AGTCGACAAGATATTGTTGGTTTTAAGTTGGATGGTTCTTGG  
AAACATCGAGAAATACGGTTTGAAACGACCAGAGATGGGTCCAATGGAGCTAAAAAG  
CGTGAAAGGCAAGACACCGGTGCTTGACATCGGAGCTATAGAG  
AAGATCCGGTTAGGAAAGATCAACGTGGTTCCAGGGATCAAAGGTTTAAACGGAAAC  
AAAGTCGAACTTGTCAATGGAGAACAACCTAGACGTAGACTCAG  
TTGTTCTAGCTACTGGTTACCGCAGCAACGTCCCATATTGGCTACAAGAGAATGAGTT  
CTTTGCAAAGAATGGTTTCCCAAAGACAGTAGCTGACAACAA  
TGTTTGGAAAGGAAGGACAGGATTGTATGCGGTTGGGTTTACGAGGAAAGGGCTCT  
CAGGTGCGTCAATGGACGCGGTTAAGATCGCACAAGACATAGGC  
TCTGTTTGGCAACTTGAAACAAAACAACCCACGAAACGCTCAAGGGTCTCTTCGA  
AGGTGTATCTCTCAACAGTTCTAA

>Glyma.13G128800

ATGGAGAACTTGTTCGCCTAGTTGACTACGAGGACATGTTCTCAAACGTTGCATTT  
GGGTCAACGGACCCGTGATAGTAGGAGCTGGTCCTTCAGGGC  
TAGCCACAGCAGCATGCCTCAAACAACAAGGGGTACCCTTCATGGTTCTCGAAAGAG  
CAGAATGCATAGCTTCCCTGTGGCAAAAACGCACCTACGACAG  
ATTAAAGCTCCACCTTCCAAAACAGTTCTGCCAGCTCCCTAACCTTCCATTCCCCAAA  
GACTTCCCCGAATACCCCAAGAAACACTTCATAGACTAC  
CTCGAATCCTATGCTCAGAAATTCGAGATCAACCCACGGTTCAACGAGTGTGTCCAG  
TGTGCTAGGTACGATGAAACCAGCGGGCTGTGGCGGGTGAAGA  
CCGTTGCCACGTGTGGCTCCGCCAAGAGCGAGTTCGAGTACATTTGCCGGTGGCTC  
GTGGTGGCCACCGGCGAGAATGCGGAGTGTGTGATCCCTGATAT  
TGAAGGGCTTGGTGAATTCAAAGGTGATGTTATTCATGCCTGCGAGTACAAGTCTGG  
AGAAAGCTTCAAAGGGAAGAAAGTGGTTGTTGTTGGTTGTGGC  
AACTCTGGCATGGAGCTCTCACTTGACTTGTGTAACCACAATGCTTCTCCTTCCATGG  
TTGTTTCGTAGCTCGGTTTCATGTGTTGCCTAGGGAGGTGTTTG  
GGAAGTCAACGTTTCGAATTGGCGGTTTTGATGCTGCAATGGTTGCCACTTTGGTTGG  
TTGACAAGATTCTATTGGTGTGACATGGTTGGTGTGGTAA  
CATGGAGAGATTCGGGCTCAAAGGCCCTCAGAGGGTCCATTGTTGCTGAAGAACA  
CAAAGGGGAAGACCCCTGTGTTGGACATTGGTACCTTGGAGAAA  
ATTAGATCCGGTGACATTAAGTTGTGCCAGAGATTAAGAGGTTTCAGCAATGGCTACG  
TTGAGTTTGTAAATGGTGAAAAGCAAGGAGTTGATGCAGTTG  
TGCTTGCAACCGGGTACCGCAGCAACGTCCCTTCTTGGCTTCAGGAAGGTGAATTTT  
TCTCCAAGAATGGTTTCCCAAATCTCCATTTCTAATGGTTG  
GAAGGGAAATGCTGGACTTTATGCAGTTGGGTTTACAAGGAGAGGGCTCTCAGGTG

CCTCATCTGATGCTATGAATATTGCTCAAGATATTGACCAAGTT  
TGGAACAAGAGACTAGGCCAAAAGAAACAACGCACCACTGCTTGTATAGACGTTGC  
ATTTCCAGTTCTGA

>Glyma.10G041800

ATGGAGAACTTGTTCGCCTAGTTGACTATGAGGACATGTTCTCAAACGTTGCATTT  
GGGTGAACGGTCCAGTTATAGTAGGAGCAGGTCCTTCAGGGC  
TAGCCACAGCAGCATGCCTGAAACAACAAGGGGTACCCTTCATGGTTCTCGAAAGAG  
CAGAATGCATAGCTTCCCTATGGCAAAAACGCGCCTACGACAG  
ATTAAACTCCACCTTCCAAAACAGTTCTGCCAGCTCCCTAACCTTCCATTCCCCAAA  
GACTTCCCCGAATACCCCAAGAAACACTTCATAGACTAC  
CTCGAATCCTATGCTCAAAAATTCGAGATCAACCCACGTTTCAACGAGTGTGTCCAGT  
GTGCTAGGTACGATGAGACCAGCGGGCTGTGGAGGGTGAAGA  
CCGTTGCCACGTGTGGCGCCGCGAAGAGCGAGTTTGAGTACATTTGCCGGTGGCTC  
GTGGTGGCCACCGGCGAGAATGCGGAGTGTGTGATCCCTGAGAT  
TGAAGGGCTTGGTGAATTCAAAGGTGATGTTATCCATGCCTGTGAGTACAAGTCTGG  
AGAAAGCTTCAAGGGGAAGAAAGTAGTTGTTGTTGGTTGTGGC  
AACTCTGGCATGGAGCTCTCGCTTGACTTGTGTAACCACAATGCTTCTCCTTCCATG  
GTTGTTCTAGCTCGGTTTCATGTGTTGCCTAGAGAGGTGTTTG  
GGAAGTCAACGTTTCAATTGGCGGTTTTGATGCTGCAATGGGTGCCACTTTGGTTGG  
TTGACAAGATTCTATTGGTGTGGCATGGTTGGTGTGCTGGGTAA  
CATGGAGAGATTCGGGCTCAAAGGCCTTCGGAGGGTCCATTGTTGCTGAAGAACA  
CAAAGGGGAAGACCCCTGTTTTGGACATTGGTACCTTGGAGAAA  
ATTAGATCCGGTGATATCAAAGTTGTGCCAGAGATTAAGAGGTTACCAATGGCTGCG  
TTGAGTTTGTAAATGGTGAAGCAACATGTTGATGCAGTTG  
TGCTTGCAACCGGGTACCGTAGCAATGTCCCTTCTGGCTCAGGAAGGTGAATTTT  
TCTCCAAAATGGATTCCCAAATCTCCATTCCCTAATGGTTG  
GAAAGGAAATGGTGGACTCTATGCTGTTGGGTTTACAAGGAGAGGGCTCTCTGGTG  
CCTCATCTGATGCTATGAAAATTGCTCAGGATATTGGCCAAGTT  
TGGAACAAGAGACTAGGCCAAAAGAAACAACGCACCAATGCTTGTATAGACGTTGC  
ATTTCTCAGTTCTAA

>AtYUC9(At1g04180)

ATGGAGAATATGTTTAGACTCATGGCAAGTGAAGAATATTTCTCAGAGCGGCGATGTG  
TTTGGGTCAACGGTCCGGTTATCGTAGGAGCTGGTCCATCCG  
GTTTAGCTACAGCAGCTTGTCTACATGATCAAGGAGTCCCATTCGTTGTGGTTCGAGA  
GATCAGATTGCATAGCGTCACTGTGGCAAAAACGAACCTACGA  
TAGGCTCAAGCTTCACTTGCCCAAGAAATTCTGCCAATTACCGAAAATGCCCTTCCC  
GGATCACTACCCTGAATACCCAACGAAACGACAGTTCATCGAT  
TACCTTGAGTCATACGCAAACCGGTTTCGATATTAACCGGAGTTTAATAAAAGCGTTG  
AGTCTGCTCGGTTTGTGAAACTAGCGGGCTATGGAGGGTTA  
GAACAACCTCAGACGGAGAGGAGATGGAATATATTTGCCGGTGGTTGGTGGTGGCG  
ACGGGAGAAAACGCCGAACGTGTTGTCCAGAGATTAATGGTCT  
TATGACGGAGTTTACGGAGAAGTGATTCACGCTTGTGAGTATAAGTCCGGCGAGAA  
ATTCAGAGGAAAGAGAGTTCTTGTCTCGGATGTGGAAACTCA  
GGCATGGAAGTCTCTTGTGATCTTGTCTAACCACAATGCAATTACTTCCATGGTTCGTTA

GAAGCTCGGTTTCATGTTTTACCGAGGGAGATTATGGGGAAAT  
CAACATTTGGAATCTCAGTGATGATGATGAAGTGGCTACCTTTATGGCTCGTAGACAA  
GCTTCTGCTTATCTTATCGTGGTTGGTTCTAGGGAGCTTATC  
AAACTATGGGCTTAAAAGGCCTGACATCGGCCAATGGAGCTTAAAAGCATGACAGG  
AAAGACGCCGGTTCTTGACATCGGTGCTCTGGAGAAGATAAAA  
TCCGGCGACGTAGAAATTGTACCTGCAATCAAACAGTTCTCGCGTCACCACGTGGAG  
CTCGTAGATGGTCAGAAGCTAGATATCGACGCTGTGGTTCTCG  
CCACCGGTTATCGTAGCAACGTCCCTTCTTGGCTTCAGGAAAGTGAGTTCTTTTCGA  
AAAATGGGTTTTCCGAAATCGCCGTTTCCAAACGCGTGGAAAGG  
GAAATCGGGATTATACGCGGCCGGATTACAGAGAAAAGGGTTGGCTGGAGCATCAG  
TAGACGCCGTTAACATCGCTCAAGACATTGGAAATGTGTGGAGA  
GAAGAGACCAAACGACAGAAGATGAGAAGAAATGTGGGTCACCGAAGATGCATCTC  
AGTTGCTTAA

>Glyma.03G169600 □

ATGGAGAACTTGTTTTGCCTAGTAGACAACGAAGACTTGTTCTCTCGCCGTTGCATTT  
GGGTGAATGGCCCTATAATCGTAGGGGCAGGACCCTCAGGGC  
TAGCCACAGCAGCATGCCTTAGAGAACAAGGGGTACCCTTCATGGTTCTCGAACGTG  
CAGATTGCATAGCCTCACTGTGGCAAAAAAGAACCTACGACAG  
GCTCAAACCTCACCTTCCAAAACAATTCTGCCAGCTCCCGAAACTACCCTTCCCTGA  
AGACTTCCCCGAATACCCACAAAGAAACAGTTCATAGAGTAC  
TTAGAATCCTACGCTAAGCACTTCGAGATCAACCCTCAGTTCAACGAGTGTGTGCAG  
TCCGCGAGGTACGACGAGACAAGCGGCTTGTGGAGGGTTAAGA  
CCGTTTTATCCTCGAGTGGCGCGGCTCGCGGCGAGGTTGAGTACATTTGCAGGTGG  
CTCGTGGTGGCCACCGGGGAGAATGCGGAGTGTGTTATGCCTGA  
GATTGAAGGGTTGAGTGAAGTTCAAAGGTGATGTGATCCATGCTTGTGATTACAAGTC  
AGGGGAGAGATTCAGGGGAAAGAAGGTTCTTGTGTTGGATGT  
GGCAATCCGGCATGGAACCTCACTTGACCTTTGCAACCACCATTCTTCTCCGTCC  
ATGGTTGTTCTGAGCTCGGTTACGTGTTGCCTAGAGAAGTGT  
TTGGAATATCAACTTTTGAATTGGCGGTTATGTTGCTGCAATGGCTGCCCTTTGGCT  
TGTTGACAAGATTCTCTTGATCTTGGCATGGTTTGTGTTGGG  
GAACATTGAGAAGTTGGGGCTCAAAGGCCTTCAAAGGGTCCTTTGGAGATGAAGA  
ACAGAAAGGGGAAGACCCAGTTTTGGATATTGGTGCCTTGGAG  
AGGATTAGATCCGGTGACATAGAAGTGGTGCCAGGAATCAAGAGGTTCAATAATGGT  
GAAGTTGAGTTTATTAATGGTAAAAGCTTGATATTGATGCAA  
TAGTGCTTGCAACCGTTACCGCAGCAATGTCCCTTCTTGGCTTCAGGAAGGTGAAT  
TTTTCTCAAAGAATGGATACCCAAAGATGCCATTCCCTCATGG  
TTGGAAGGGAAATGCTGGACTTTATGCTGTGGGGTTCACAAAGAGAGGGCTCTCTG  
GTGCTTCTTCTGATGCTGTGAAAATTGCTCAAGATATTGGCCAA  
GTTTGGAAAAATGAGACTAAGCAAAGAAACAGCGCACTACTGCTTGTGATAGACGT  
TGCATTTACAGTTCTAA

>AtYUC10(At1g48910)

ATGGAGACCGTAGTGGTGATTGTGGGAGCTGGACCGGCCGTTTAGCAACATCGGT  
TTGTCTAAACCAACTCAATCCCAAACGTGATCCTCGAGAAAG  
AAGACATCTATGCATCCCTTTGGAAGAAACGAGCGTACGATCGTCTCAAACCTCACTT

AGCCAAAGAATTTTGCCAGCTTCCTTTCATGCCACACGGTCG  
TGAGGTTCCAACCTTTATGTCCAAAGAGCTTTTCGTCAACTACCTTGACGCTTACGTT  
GCCCCGTTTCGACATCAACCCTAGGTACAACCGTACCGTGAAG  
TCCTCAACGTTTCGATGAGTCCAATAACAAGTGGAGGGTCGTGGCCGAAAACACGGT  
AACCGGAGAAACCGAGGTGTATTGGTTCGGAGTTTCTGGTGGTTG  
CGACCGGGGAGAACGGAGATGGGAATATTCCGATGGTGGAGGGGATTGACACTTTT  
GGGGGAGAGATTATGCACTCGAGTGAAGTACAAGTCCGGTCGTGA  
TTTTAAAGATAAAAATGTTCTTGTGGTTCGGAGGTGGAAATCCGGTATGGAGATTAGT  
TTTGATCTTTGCAACTTCGGAGCTAATACGACCATTCTAATT  
AGAACTCCAAGACACGTGGTGAATAAAGAAGTGATACACTTGGGGATGACACTTCTG  
AAGTATGCTCCAGTGGCGATGGTTCGACACATTGGTGAAGTACTA  
TGCCAAAAATTTGTACGGAGATCTCTCCAAGTACGGACTCTTCCGACCAAACAAG  
GTCCTTTCGCCACCAAACCTTTACCGGAAAAGCTCCTGTCAT  
TGATGTTGGAAGTGTGCGAGAAGATTTCGCGATGGCGAGATTCAGGTTATCAATGGTGG  
GATTGGAAGCATCAACGGGAAGACCTTGACGTTTCGAAAACGGA  
CATAACAAGATTTTCGATGCGATTGTGTTTGTACTGGTTACAAAAGCTCCGTTTGCA  
ATTGTTAGAGGACTATGAATACGTGATGAAGAAGGATGGAT  
TCCCCAAAGCACCGATGCCAAAACATTGGAAAGGAGAGAAGAATCTTTACTGTGCCG  
GATTTTCAAGAAAAGGAATCGCCGGAGGTGCTGAGGATGCTAT  
GTCTGTAGCCGACGACATCAGATCTATCTTGGCTACCTTAAAAATAATTGA

>Glyma.04G213600

ATGGAGGAAGTATCAGTGATAATCGTAGGTGCAGGTCCTTCTGGACTTGCAATTTCTG  
CATGCCTATCACAAAACCTTTATCTCTCACATAATACTCGAGA  
AAGAGGATTGCAGTGCCTCTCTTTGGAGGAAAACGCTTATGATAGATTAAAGCTCCA  
TCTTGCTAGCGAGTTTTGTGTTTTGCCTCTCATGCCTCACCC  
ACCCTCAGCCCCAACTTACCTATCCAAAGATGAATTTGTTCAATACATTGACTCGTACA  
TTGCATGTTTCAACATAAACCTCTCTATTGTCGTATGGTT  
GAGTTTGTGCTGCGTATGATGAAGTTGAAAACAAGTGGAGGGTTCGAAGCGAAGAAGAC  
TCTTGAGGGCACAAGTGAACTTATGTGGCTAAGTTTCTTGTGA  
TTGCCACGGGTGAAAATAGTGAAGGGTATATTCCTGATGTGCCTGGACTAGAAAGCT  
TTGAAGGAGAGATAGTGCCTCAAAATACTACAAATCGGGTTC  
AAAATATGAAACCAAAGAAGTTTTGGTAGTTGGGTGTGGTAACTCTGGGATGGAGATT  
GCTTATGATCTCAATGACTGGGGTGCAAACACTTCTATTCTC  
ATCCGAAATCCGGTTCATGTCTTCACCAAAGAATTGATCAATGAAGGCATGCGAATGC  
TGAAGCATTACCCGTTTCATGTTGTGGACAATATCATTACCT  
CTTTGGCAAACATGGAATATGGTGTATCTAAGTACGGAATTTATCAGCCCCAAAAA  
GGACCCTTTCATCTTAAGTTTATAACTGGAAGGGCTCCAGT  
TATCGATGTTGGAACCATTGAAAAGATTAAGGAGGGAGCAATTAAGGTAATTCCTTCT  
CATATAGTGAGAATTGAAAACAAGAAGGTCATATTTGAAAAC  
GATGCTGAAAAGGAGTTTGTATGTAATCGTGTGTTGCTACTGGCTACAGAAGTGTAGCTA  
ATAAGTGGCTTAAGGATTACAAATATGTTCTAAATGATGAGG  
GGATGCCGAACAATGATTTTCAAACCATTGGAAGGGTGTGCGTGGATTATATTGTGC  
AGGACTATCAAACAGAGGCTTATTTGGAGTCAAATGGATGT  
TGAGGCTATTGCTGATGACATCAACCAAACCTCTCAAGTTACATTAA

>Glyma.06G152700

ATGGAGGAAGTATCAGTTATAATTGCAGGTGCAGGTCCTTCTGGCCTTGCAATTTCTG  
CATGTCTATCACAAAACCTCTATCTCTCACATAATACTAGAGA  
AAGATGATTGTAGTGCCTCTCTTTGGAGGAAAAATGCTTATGATAGATTAAGCTTCAT  
CTTGCTAGCGAGTTTTGTGCTTTGCCTCTCATGCCTCACTC  
ACCCTCATCCCCAACCTTCTATCCAAAGATGAGTTTGTTCATAACATTGACTCATACA  
TTGCCCGTTTTCAACATAAACCTCTCTATTGTCGTTTTATT  
GAATTTGCTGCGTATGATGAAGTTGAAAACAAGTGGAGGGTGAAGCAAAGAACA  
CTTGAAGGCACAAGGGAAATTTACGTAGCTAAGTTTCTTGTGA  
TTGCCACGGGTGAAAATAGTGAAGGGTATATTCCTGATGTGCATGGACTAGAAAGCTT  
TGAAGGAGAGATAATGCACTCCAATACTACAAATCGGGTTC  
AAAATATGAATCCAAAGAGGTTTTGGTAGTTGGGTGCGGTAACCTCTGGAATGGAGATT  
GCTTACGATCTCAATGACTGGGGTGCAAACACTTCTATTCTC  
ATCAGAAATCCGGTTCATGTCTTACCAAAGAATTGATCAATGAAGGCATGCGTATGA  
TGAAGCATTGCCCATTGTTGTGGACACTATCATTACCT  
CTTTGGCAAACATGGAATATGGTGTCTATCTAAGTATGGAATTTATCAGCCCCAAAAA  
GGACCCTTTCAGCTTAAGTTTATTACTGGAAGGGCTCCCGT  
TATCGATGTTGGAACCATTGGAAGGATTAAGGAGGGAGCAATTAAGGTAATTCCTTCT  
CATATAGTGAGAATTGAAAACAAGAAGGTCATCTTTGGAAAT  
GATGTGGAAGAAGTTTGTATGTAATCGTTTTTGTACTGGTTACATAAGCGTGGCTA  
ATAAGTGGCTTAAGGACTACAAATACATTCTAAATGATGAGG  
GGATGCCAAAAAATGATTTTCAAACCATTGGAAGGGTGTATCGTGGATTATATTGTGC  
AGGACTGTCAAACAGAGGCTTATTTGGAGTCAAATGGATGC  
TGAGGCTATTGCTGATGACATCAATCAAACCTTTAAGTTACATTAA

>AtYUC11(At1g21430)

ATGGAGAAAGAAATCAAGATTCTGGTTTTGATTATCGGTGCAGGACCAGCCGGTTTA  
GCAACATCAGCTTGTCTTAACCGGTTGAACATAACCAAACATAG  
TAGTGGAAAGAGATGTTTGCAGTGCCTCTCTGTGGAAAAGAAGGTCTTACGATCGTC  
TCAAGCTCCACCTCGCAAAGCAATTCTGTCAACTCCCTCACAT  
GCCATTCCCCTCAAACACTCCTACCTTCGTCTCCAAGCTAGGTTTCATCAATTACCTT  
GACGAATACGCCACACGTTTCAACGTAAACCCTAGGTACAAC  
CGGAACGTCAAATCCGCGTACTTCAAAGATGGTCAATGGATCGTGAAGGTGGTGAAC  
AAAACCACGGCGTTGATAGAAGTTTACTCGGCGAAGTTTATGG  
TTGCTGCGACGGGAGAGAATGGCGAAGGTGTGATTCCAGAGATTCCGGGGCTTGTA  
GAGAGCTTTCAAGGAAAGTATTTGCACTCAAGTGAAGTACAAGAA  
CGGAGAGAAGTTGCTGGAAAAGATGTTTTGGTCGTCGGATGTGGAATTCTGGCAT  
GGAGATTGCTTATGATCTATCTAAGTGCAACGCTAATGTCTCC  
ATCGTTGTTGTCGAGCCAGGTGCACGTGTTAACGAGATGTATCGTACGGATAGGAATGT  
CGTTGCTCAGGTTTTTCCCGGTAAAATTAGTTGACCGTTTGT  
GTCTATTACTAGCGGAGCTGAGGTTTTCGGAATACTTCGAGATATGGGCTTGTAAGACC  
CAATAATGGCCATTTCTGAACAAGCTAATCACCGGCCGGTC  
AGCTACCATTGACGTGCGCTGCGTGGAGAGATAAAGTCCGGCAAGATTGAGGTTG  
TGACGTGATTAAGCGTATAGAAGGGAAGACAGTAGAATTCATC  
GATGGAACACCAAAAATGTGGACTCCATTGTCTTCGCAACTGGTTACAAAAGCAGC

GTTTCAAATGGCTTGAGGTCGATGATGGAGATCTGTTCAACG  
AGAATGGGATGCCGAAACGCGAGTTCCCGGATCACTGGAAGGGGAAGAATGGTTTG  
TATAGTGCTGGCTTTGGGAAACAAGGCTTGGCTGGTATTTCAAG  
AGATGCTCGGAACATTGCTAGAGACATTGATTCTCTGGTTTGTGGGAGAAGCAGCAA  
GAACAAGCTTTCCAAATAA

>Glyma.06G120700

ATGGA AATTGAAGTTCCTGTTGTGATTGTGGGTGCAGGCCCTGCTGGCCTAGCAACC  
GCTGCATGCCTTAACAAATATTCCATCCCTAACGTTGTTTTGG  
AAAGAGATGATTGCCATGCATCTCTTTGGAGGAAAAGGGCTTATGACCGCTTGAAAC  
TTCACCTTAGGCAAAGATTTTTGCAACCTCCCTCACATGCCATT  
TCCGCCTGATTTTCCCACCTTTGTCCCTAGGGTTGACTTTTTACGCTACTTGGACAAC  
TATGTCACCCGTTTTAAATTTCCATCCGGTACAACCGGAAT  
GTGGAATCTGCTTCTATGGATGAACAAAACAATGGGAAATGGAGGGTTGTTGTCAAG  
GACACAACAACAATGCTGATGAGGTTTACGTGGCAAACCTATC  
TGGTGGTTGCAACTGGGGAGAATAGTGAAGGGTATGTGCCCCAGATTGAAGGGCTT  
GAAGGATTTGAAGGGAAACACATGCATTGCAGCGAGTACCTGAA  
TGGAAGAGACTTGTATGGCAAACATGTCTTGTGTTGGCTGTGGCAATTCTGGCAT  
GGAGATCGCTTATGATCTCTCAAATTGGGGTGCAAATACCTCT  
ATTGTTGTTAGAGGCCCTGTTTATTATTTACCAAAGAAATGGTGTACGTGGGAATGT  
CCTTGCTGAAATACTTCAAATAGAGAAGGTGGACAAGCTTA  
TGTTGCTCATGAGCAAACCTGAAGTATGGAGACATGTCCAATTACGGCTTGATCAGGC  
CAAAGGATGGACCCTTCTTTCTGAAGAAAAGGGTGGAACTAC  
CCCTACCATAGATGTGGGTTGTGTTAGTAGGATTAAGAAAGGCGAAGTGAAGGTTTTTC  
CCAGCTATTTCAAGCATTAAAGAGGACAAGTTGATTGAGTTT  
GAGGATGGACAAAATGGTCAATTTGATGTCATCATCTTTGCTACTGGATACAATAGCA  
CTGTGCTGAAGTGGCTTAAGGATTACAGAGGGCTGTTCAATG  
AGAATGGAATGCCAAAACAGATTTTCAAATCACTGGAAGGGAGAGAATGGTATCTA  
CTGCGCTGGATTTTCAAGAAGGGGATTAGATGGCATTGCTTT  
TGATGCCAAGCGTATTGCTGCTGACATAAAAAAGACCGTGAATATAAAGAACTTACCC  
AGTGAAGAGGACAACCTTTGCTTCTTCAAACCTTAGAAAAA  
TAA

>Glyma.04G242500

ATGAATAGCCAGGCTTATAAAAGCAGCACCCAGCAAAGAGAAGAAAACCACCAAAGC  
CACTGCATTACCAATTTGAAACCAAACACCAAACCAAACCA  
TGGA AATTGAAGTTCCTGTTGTGATTGTGGGTGCTGGCCCTGCTGGCTTAGCAACCG  
CTGCATGCCTTAACAAATATTCCATCCCAACGTTGTTTTAGA  
AAGACATGATTGTCATGCATCTCTTTGGAGGAAAAGGACTTATGACCGCTTGAACTT  
CACTTAGGCAAAGATTTTTGCAATCTCCCTCATATGCCCTTT  
CCTCTAGATTTTCTACCTTTGTCCCTAGGGTTGACTTTTTACGTTACTTGGACAACCTA  
TGTCACCCGTTTTAAGATTTCCATCCGGTATACCCGGAATG  
TGGAATCTGCTTCTGTGGATGAAGAAAACAATGGGAAATGGAGGGTTGTTGTGAAGG  
ACACAACAACAATGCTGATGAGGTTTATGTGGCAGACTATCT  
GGTGGTTGCAACTGGGGAGAATGATGAAGGGTATGTGCCCCAGATTGAAGGGCTTG  
AAGGGTTTGAAGGGGAACACATGCATTGCAGCCAGTACCTGAAT

GGAAGACACCTGTATGGAAAAATGTCCTTGTTGTTGGCAGTGGCAACTCTGGCATG  
GAGATAGCTTATGATCTCTCAACTTGGGGTGCAAATACCTCTA  
TTGTTATTAGGGGCCCTGTTTCATTATTTTACCAAAGAAATGGTTTTCTGTTGGGAATGTCC  
TTGCTGAAATACTTCAAATGGAGAAGGTGGACAAGCTTAT  
GTTGCTCATGAGCAAAGTATGGAGACATGTCCGAGTATGGCTTGGTCAGGCC  
AAAGGATGGACCCTTCTTCTGAAGATAAAGGGTGGAACTACC  
CCTACCATTGATGTGGGTTGCGTTAGTAGGATTAAGAAAGGCGAAGTAAAGGTTTTCC  
CTGCTATTTCAAGCATCAAAAAGGACAAGATGGTTGAGTTTG  
AGGATGGACAAAATGGTCAATTTGATGTCATCATCTTGGCTACTGGATACAATAGCACT  
GTGCTGAAGTGGCTTAAGGATTACAGAGGGCTGTTCAATGA  
GAATGGAATGCCAAAACCAAGTTTTCCAATCACTGGAAGGGAAACAACGGTATCTA  
CTGCGCTGGATTTTCAAGAAGGGGATTAGATGGCATTGCTTTT  
GATGCCAGCGTATTGCTGATGACATAAAAAGACTCTGAATGCAAGGAACTTACCC  
GGTGATGAAGAGGACAATTTTGCTTCCCTCAAACCTTAGGAA  
AATAA

>Medtr1g008380

ATGGACTGTTATCTAAGAGAATTAGAAGGAAAACAAGCACATGATCCTTTATTCATAGA  
AAAAATGATCAACAACAAGAATTCAACTTCTTCAAGTG  
ATAGATGTTTATGGATTCCAGGTCCATTGATAGTAGGAGCAGGACCATCAGGACTAGC  
AGTGGCAGCATATCTAAAACAAAAGGTGTTCCAAGTTAAT  
ACTAGAAAGATCAAATTGTATAGCTTCACTATGGAAGCTAAAACCTACGATCGTCTTC  
GTCTTCATTTACCAAACAAGTTTGTGAGCTTCTTTAATG  
GAATCCCTAGTGGTTTTCCAACATATCCAACAAAGCAACAATTCATAGAGTATTTGGA  
AAGTTATTCAAAAATTCGATATTAGGCCTTGGTTCAATG  
AGACAGTTATGCATGCTGAGTTTGTGCTACACTTGGTTTTTGGAGGGTGAGAAGTG  
AGGGGAAGGCGGGAATGGTCACCGAATTTGTTTGCCGGTGGTT  
GATCGTTGCAACCGGAGAGAATGCTGAGGCGGTTGTACCCGAGATTGAAGGAGTTG  
ATGAGTTTGTGGTAGTATTAGGCATACTAGTTTGTATAAAAGT  
GGTGAAGAGTTTAGAGGGAAGAAAGTTTTGGTTGTTGGATGTGGAAATTCAGGTATG  
GAAGTTTGTGGATCTTTGTAATCATGATGCTGCTCCTTCTA  
TTGTGGTTAGAGATTCTGTACACATCCTACCAAGAGATATGCTGGGAAAATCAACTTTT  
GGGTTGTCCATGTGGTTGCTCAAGTGGCTACCCGTGCAACT  
GGTGGATCACATCCTTCTCACTGTGTCATGGTTAATGCTCGGCAACACAGAACGGTT  
CGGTTTGGTTTCGGCCTCGGTTGGGTCCCCTTGAACCTCAAAAA  
CTGTCTGAAAGACACCGGTCTAGATGTGGGTGCCCTTGCCAAGATTAAAAGAGG  
AGACATCAAGGTACGTCCAGGCATAAAGAGGTTAAAACGCTACA  
CAGTGAATTTGCTGATGGAAGTACAGAGAATTTTACGCCATAATACTGGCAACTGG  
TTACAAAAGTAATGTACCCTATTGGTTAAAGGATAAGGGAAT  
GTTCTCTAAGGAAGATGGATACCCTAGGAAGCCATTCCCTAATGGATGGAAAGGTGA  
AAATGGCCTCTATGCTGTTGGTTTCACTAAACGTGGACTACTT  
GGTGCATCTATGGATGCAAAAAATATTGCTGAAGATATTGAACGGTGTGGAAAGCTG  
AGGCAAAGCATATATTTCCACAATCAAATTCATGA

>Medtr1g011630

ATGGATCCTTTCAAAGAAAAAGTAAAGTGTGTATGGATTTCATGGACCTATCATAGTAGG



TGCTGGTCCTTCAGGTATAGCAGTAGCTGCTTGTTTATCAG  
AGCAAGGAGTACCAAGTCTCATTCTTGAGAGAAGTGATTGCATAGCTTCACTATGGCA  
AAATAGAACCTATGACCGTTTAAACTTCATTTACCTAAACA  
TTTTTGTGAACTACCTATGATGAGTTTTCTCAAACCTTTCTAAGTATCCTACAAAACA  
TCAGTTCATTTCTACATGGAATCCTATGCTGATCACTTT  
CATATTCATCCTAGGTTAATCAAACCTGTTCTTAGTGCTGAGTTTGATTCAACTTCTCA  
AATTTGGATGGTTAGAACAAAAGAAGGTGATTTTCAGTATT  
TTTCACCTTGGCTTATTGTTGCTACTGGTGAAAATGCTGAACCTGTTTTCTACAATT  
CATGGTATGGAACATTTTCATGGTCCTGTTGTTCATAACAAG  
TGATTATAAATCTGGTTCTGAATACAAAATAAAAAGTTTTGGTCATTGGTTGTGGGA  
ATTCTGGAATGGAAGTTAGTTTGGATCTTTGTAGACACAAT  
GCTATGCCTCATTTGGTTGCAAGAACTCAGTACATATTCTCCCAAGAGACATGTTTG  
GTTTCTCAACATATGGAATAGCTATGGGACTATATAAATGGC  
TTCCATTAATAATTAGTAGACAAATTTCTTGTAGTTTCAAGCTTCTTCTTGGGAAAC  
ACCAATCACTATGGTATCAAGAGGCCTAAAACCTGGCCCAAT  
AGAACTCAAACCTTGAACAGGAAAACTCCTGTACTTGATGTTGGTCAAATAGCACAA  
ATTAAATCCGGTAACATTAAGGTGATGGAAGGTGTGAAAGAG  
ATAACAAGAAATGGTGCAAATTTTTGGATGGACAAGAAAAGGAATTTGATGCAATAAT  
ATTAGCAACAGGGTACAAGAGCAATGTGCCTAGTTGGCTCA  
AGGGTAATGATTTTTCTACTAAAGATGGAATGCCAAAAACACCCTTTCCTCATGGTTG  
GAAAGGTGAACAAGGATTGTATACAGTGGGTTTACAAGAAG  
AGGTCTACATGGAACATACTTTGATGCCATCAAATAGCTGAAGATATTACTAATCAAT  
GGAAAACACTTAAGAGCAAGAGTTGTTGTGATTACATATC  
ATACTACTCAATAATTCATAA

>Medtr1g046230

ATGCCACCAATGTCTCAAACATTCGACCCCGAAGACATTCTCAAAAACCGTTGCATAT  
TAGTGAATGGACCTGTTATAGTTGGAGCTGGTCCATCAGGCT  
TAGCAGTTGCAGCTTGTTTGAAGACCAAATGTTCTTTTGTGTCCTCGAACGAG  
CTAACTGCATTGCCTCGCTTTGGCAGAATCGAACCTACGATCG  
TCTTAACTTCATCTTCTAAACAATTGTGTCAACTACCCAATTTTCCATTCCCTGATCA  
CTTCCCTGAATACCCTTCAAATTTTCAAGTTCATAAGTTAC  
CTCGAATCATATGCGAAAACTTTAACATAACACCAAATTTCAATGAAACAGTGCTTTC  
TGCTAAGTATGATGAAACCTTTGGTCTTTGGAGGATTAAGA  
GCAATAGGATAAAAAGTGATAAAGTTGTTGAAGTTGAGTATATTTGTAGGTGGCTTGTG  
GTTGCTACCGGTGAAAACCTCGGAGAAAGTTGTGCCGGAATT  
TGAAGGTTTGAAGTATTTTGGTGGAAATGTTATGCATGCTTGTGACTATAAATCTGGT  
GTGAATTATAGTGGAATAAATGTTCTTGTGTTGGATGTGGA  
AATTCTGGCATGGAAGTTTCTTGTGATCTTTGTAACCATAATGCAAATCCATCAATGGT  
TGTTTGAAGTTTCGGTTCATGTGTTACCGAGGGAAATATTTCG  
GAAAATCAAACCTTATGAGGTAGCTGTTATGTTGATGAAAAGGTTACCAATTTGGATGGTC  
GATAAGATATTGCTTGGTCTAACTCGTGTGATTTTGGGAAA  
TGTCGAAAAGTATGGTCTAAAAGGCCATGTATGGGACCTTTAGAGCTTAAGAACACT  
TCCGGGAAGACACCGGTTTTAGATATCGGAGCACTTGAGAAA  
GTTAGATCTGGTGAATTAAGTTGTTTCTGGAATAAAGAGATTTTACAAGGGAAAG

TTGAACTTGTTGATGGAAAAGTTCTTGATATTGATTCTGTTG  
TTCTTGCTACTGGCTATAGAAGCAATGTACCATCTTGGCTTAAGGAGAATGAATTTTTT  
TCCAAAGATGGAATGCCAAAAGATCCATTTCCAAATGGATG  
GAAAGGAAATGCTGGTCTATATGCTGTTGGATTTACAAGGAGAGGACTCTCTGGTGC  
TTCATTGGATGCAATTAGTGTGTCTCAAGACATTGCTAAAAGT  
TGGAAAGAAGAAAATAAACAAAGAAAGAAAACAGTGGCTGCACGTCATAGGAGATGC  
ATATCACACTTCTAA

>Medtr1g069275

ATGGAGAACTTGATTGCCTAGTCGATAATGAAGAAGACGCAGTCTCACATCGTTGC  
ATTTGGGTAAATGGTCTATAATAGTAGGAGCAGGACCATCAG  
GTCTAGCAACAGCAGCATGTCTTAAGCAACAAGGAGTACCCTTCATGGTTCTTGAAA  
GATCAAATTGCATAGCTTCACTATGGCAAAAAAGAACATATGA  
CAGATTAAACTTCACCTCCCTAAACAATTCTGTCAACTACCTAACTTTCCATTCCCAC  
AAGAATTTCTGAATATCCAACAAAGAAACAGTTCATAAAC  
TATCTTGAATCCTACGCGAAACACTTTGAAATCAACCCGCGATTCAACGAGTGTGTTG  
AATCTGCTAAATATGATGAGACTAATGGGTTGTGGAGAGTTG  
AGACTGTTTCCAATGGAAATGAAGTTGAGTATATTTGTAGGTCGCTTGTGGTTGCTAC  
TGGTGAGAATGCAGAGTGTGTTGTGCCTTATATTGAAGGGTT  
AGGTGGTGAATCAAGGGTGAATTATTCATGCTTGTGATTATAAATCAGGTGAAAGTT  
TTAGAGGGAAGAAAGTTTTGGTTGTTGGTTGTGGTAATTCT  
GGAATGGAACCTTCTCTTGATCTTTGCAATCATAATGCATCACCTTCTATTGTTCTTCG  
TAGCTCGGTTTCATGTTTTGCCTAGAGAAGTTTTTGGGAAAT  
CAACATTTGGATTGGCAGTTATGATGATGAAATGGTTACCAGTTTGGATAGTTGACAA  
GATTTTGTGATTTTGGCTTGGTTAGTGTGGTAATATAGA  
GAAGTATGGTCTTAAAAGGCCATTGGAAGGTCCTTTGGAGCTTAAGAACACAAAGGG  
TAAGACCCCTGTTTTGGATATTGGAACCTTGGAGAAAATTAGA  
TCTGGTCACATAAAAGTTGTGCCTGGAATTAAGAGGTTTACTAATGGCTATGTTGAAC  
TTGTTAATGGTGAAGAATCAAGTTGATGCAGTTGTTCTTG  
CTACTGGATATCGTAGCAATGTCCCTTCTTGGCTTAAGGAAGGTGAATTTTTCTCCAA  
GAATGGATTTCCAAAGTCACCATTCCCTAATGGTTGGAAAGG  
AACTGTTGGACTTTATGCTGTTGGGTTTACAAGAGAGGGCTCTCTGGTTCTTCATAT  
GATGCTAAACAAATTGCTCAAGATATTGCTCAAGTTTGGAAA  
CAAGAGATTAAGCAAAGAAACACTGCACTAATGCTTGCAATAAACGTTGCATTTCCC  
AATTCTGA

>Medtr3g088925

ATGGAAGTTGAAATTCCTGTTGTGATTGTAGGTGCTGGGCCTGGTGGCTTAGCAACC  
TCAGCATGTCTTAACAAACATTCAATCTCAAACATTATCTTAG  
AGAAAGATGATTGTCATGCATCTCTTTGGAGGAAAAGAGCCTATGACCGTTTGAAACT  
TCACTTGGGCAAAGATTTTTGTAACCTACCTCACATGCCTTT  
CCCATCTGATTTCCCAACCTTTGTCCCTAGGGTTGATTTCCCTTCGTTATTTGGACGATT  
ATGTGACTCATATGAAGATCTGCATCCGGTACAACCGGTAT  
GTCAATGATGCTTCTTTTGTGCCACTAATGGGAAATGGAGGGTTTGTGTGCATGATA  
CTACATTGAATCTTGATGAAATTTATGTTGCTGATTATCTAG  
TTGTTGCAACTGGAGAAAAGTGTGATCCTTACATTCCCATGATAAATGGGCTTGAAAG

CTTTGAAGGTGAATACCTTCATTGCAGCAAATATCTGAATGG  
AAGGCCTTGGTATGATAAAAATGTCTTGGTTGTTGGTAGTGAAATTCTGGCATGGAG  
ATAGCTTATGATGTCTCTACTTGGGGTGCAAATACCTCCATG  
GTTATAAGAAGTCCTGTACATTATCTTACAAAAGAAATGGTGTACATTGGAATGTCTTT  
GCTGAAATACATAAGTATTGAAAAGATCGACAAGCTCATGG  
TGTTTATGAGCAAAATGGTGTACGGAGATATGTCTAAGTACGGCTTGGTCAGACCAA  
GGATGGACCCTTTGCCATGAAAAAGAAGGGTGGCCGTACGCC  
TACCATTGATGTTGGCTGCGTCAAACAGATCAAAAAGGCAAAGTTAAGGTGTACCC  
GGCTATTTCAAGCATAAAAAAGGGTAAGATCATTGAGTTTGCT  
GATGGAAAAAGTGGTCAATTTGACGTCATAGTCTTTGCAACTGGATACAGAAGCAGC  
GTTCAGAAGTGGCTTAAGGATTACAAAGAGCTGTTCAATGAGA  
ATGGAATGCCTAAAGCACGTTTTCCAGATCACTGGAAAGGAGAAAATGGAATCTATTG  
TGCTGGATTCTCACAAAATGGATTACAAGGCATTCATTTGA  
TGCTCTGAAAATTGCAAATGATATCAGTTTCACTGTTAATGCAATGAAGCATCATGATG  
CTGAAGCCAATGCTGAAATCAAGTTATTGGATGAATGA

>Medtr3g088945

ATGGAAGTTGAAATTCCTGTTGTGATTGTAGGTGCTGGGCCTGGTGGCTTAGCAACC  
TCAGCATGTCTTAACAAACATTCAATCTCAAACATTATCTTAG  
AGAAAGATGATTGTCATGCATCTCTTTGGAGGAAAAGAGCCTATGACCGTTTGAAACT  
TCACTTGGGCAAAGATTTTTGTAACCTACCTCACATGCCTTT  
CCCATCTGATTTCCCAACCTTTGTCCCTAGGGTTGATTTCCCTTCGTTATTTGGACGATT  
ATGTGACTCATATGAAGATCTGCATCCGGTACAACCGGTAT  
GTCAATGATGCTTCTTTTGATGCCACTAATGGGAAATGGAGGGTTTGTGTGCATGATA  
CTACATTGAATCTTGATGAAATTTATGTTGCTGATTATCTAG  
TTGTTGCAACTGGAGAAAACGTGATCCTTACATTCCCATGATAAATGGGCTTGAAAG  
CTTTGAAGGTGAATACCTTCATTGCAGCAAATATCTGAATGG  
AAGGCCATGGTATGATAAAAATGTCTTGGTTGTTGGTAGTGAAATTTTGGCATGGAG  
ATCGCTTATGATGTCTCTACTTGGGGTGCAAATACCTCCATG  
GTTATAAGAAGTCCCGTACATTATCTTACAAAGGAAATGGTGTACATTGGAATGTCTTT  
GCTGAAATACATAAGTATTGAAAAGATCGACAAGCTCATGG  
TGTTTATGAGCAAAATGGTGTACGGAGATATGTCTAAGTACGGCTTGGTAAGACCAA  
GGATGGACCCTTTGCCATGAAAAAGAAGGGTGGTCGTACGCC  
TACCATTGATGTTGGTTGCGTCAAACAGATCAAGAAAGGCAAAGTTAAGGTGTATCCA  
GCTATTTCAAGCATAAAAAAGGGCAAGATCATTGAGTTTGCT  
GATGGAAAAAGTGGTCAATTTGACGTCATAGTCTTTGCTACTGGATACAGAAGCAGC  
GTTCAGAAGTGGCTTAAGGATTACAAAGAGCTCTTCAATGAGA  
ATGGAATGCCTAAAGCACGTTTTCCAGATCACTGGAAAGGGGAAAATGGAATCTATTG  
TGTTGGATTCTCACGAAATGGATTACAAGGCATTCATTTGA  
TGCTCTGAAAATTACAAATGATATCAGTTTTACTGTTAATGCAATGAAGCATCATGATGC  
TGATGCCAATGCTTGA

>Medtr3g088955

ATGGAAGTTGAAATTCCTGTTGTGATTGTAGGTGCTGGGCCTGGTGGCCTAGCAACC  
TCAGCATGTCTTAACAAACATTCAATCTCAAACATTATCTTAG  
AGAAAGATGATTGTCATGCATCTCTTTGGAGGAAAAGAGCCTATGACCGTTTGAAACT

TCACCTGGGCAAAGATTTTTGTAACCTACCTCACATGCCTTT  
CCCATCTGATTTCCCAACCTTTGTCCCTAGGGTTGATTTCCCTTCGTTATTTGGACGATT  
ATGTGACTCAAATGAAGATATGCATCCAGTACAACCGGTAT  
GTCAATGATGCTTCTTTTGATGTCACTGATGGGAAATGGAGGGTTTGTGTGCATGATA  
CTACATTGAATGTTAATGAGATTTATGTTGCTGATTATCTAA  
TTGTTGCAACTGGAGAAAACCTGTGATCCTTACATTCCCATGATAAATGGGCTTGAAAG  
CTTTGAAGGTGAATATCTTCATTGCAGCAAATATCTGAATGG  
AAGGCTGTGGTATGATAAAAATGTCTTGGTTGTTGGTAGTGGAATTTCTGGCATGGAG  
ATTGCTTATGATGTCTCTACTTGGGGTGCAAATACCTCCATG  
GTTATAAGAAGTCCCGTACATTATCTTACAAAGGAAATGGTGTACATTGGAATGTCTTT  
GCTGAAATACATAAGTATTGAAAAGATCGACAAGCTTATGG  
TGTTTATGAGCAAATGGTGAATGGAGATATGTCTAAGTACGGCTTGGTCAGACCAA  
GGATGGACCCTTTGCCATGAAAAGAAGGGTGGCCGTACGCC  
TACCATTGATGTTGGCTGCGTCAAACAGATCAAGAAAGGCAAAGTTAAGGTGTACCC  
CGCTATTTCAAGCATAAAAAGGGTAAGATCATTGAGTTTGCT  
GATGGAAAAGGGGTCAATTTGACGTACATGCTTTGCTACTGGATACAGAAGCAGC  
GTTCAGAAGTGGCTTAAGGATTACAAAGAGCTGTTCAATGAGA  
ATGGAATGCCTAAAGCACGTTTTCCAGATCACTGGAAAGGAGAAAATGGAATCTATTG  
TGCTGGATTCTCACAAAATGGATTACAAGGCATTCATTTTGA  
TGCTCTGAAAATTGCAAATGATATCAGTTTCACTGTTAATGCAATGAAGCATCATGATG  
CTGAGGCCAATGCTGAAATCAAGTTATTGGATGAATGA

>Medtr4g051642

ATGGAATTGAAATGCCTGTTGTGATTGTAGGTGCTGGGCCTGGTGGCTTAGCAACC  
TCAGCATGTCTTAACAAACATTCAATCTCAAACATTATCTTAG  
AGAAAGATGATTGTCATGCATCTCTTTGGAGGAAAAGAACCCTATGACCGTTTGAAACT  
TCACATTGGTAAAAAGTTTTGTAACCTACCTCACTTACCTAT  
CCCATCTGATTTACCAAACCTTTGTTCCCTAGGGTTGATTTCCCTTCGTTATTTAGACAATTA  
TGTGAATCATTTAAGATCTGTATTCGGTACAACCGGTAT  
GTTGATGATGCATCTTTTGATGTCAAGAGTGGGAAATGGAGGGTTTGTGTGAGGGAT  
AATAGATTAATATTGATGAGATTTATGTTGCTGATTATCTAG  
TGTTTGCAACTGGAGAAAACCTGTGATGAATATATTCCCATGATAAATGGGCTTGAAAG  
CTTTGAAGGTGAATACCTTCATAGTAGCAAATATCTTAATGG  
AAGGTCATGGTATGATAAGAATGTTTTAATTGTTGGAAGTGGAAATTCTGGCATGGAG  
ATTGCTTATGATGTCTCAAATTGGGGTGCAAATACCTCCATC  
GTTATAAGAAGTCATATGCATCCTCTTACAAAAGAAATGGTGTTCGTGGGAATGTGTTT  
GATGAAATACTTAAGTGTAGAAAAGGTGGACAAACTGTTGG  
TGTTTATGAGCAAATGATGTATGGAGATATGTCTAAGTATGGTTTGTATCAGACCAAAG  
GAAGGACCTTTCTCCATTAGAGTTAGGACGGGTGCTCCCCC  
TAGCATTGATGTTGGTTGCATTAATGATCAAGAAAGGCAAAGTAAAGGTGTATCCG  
ACGATTTACGCATCAAAAAGGGCAAGATTGTTGAGTTTGTA  
GATGGAAAAGTGGACAATTTGATGTTATAGTCTTTGCTACTGGATATAGAAGCAATGT  
GTTGGAGTGGCTTAAGGATTACAAAGAGTTGTTCAATGAGA  
ATGGAATGCCTAAAGGCTGTTATCCAAATCACTGGAAAGGAGAAAATGGACTATACTG  
TGCATTCTCAAGAAGAGCATTACAAGGCATTGTTTATAGTTC

ACAGAAAATAGCAAATGATATTAGTCTCACTATAGATGCAAAGAAGCTGCTTGCTGAA  
GCTGTTGAGGTCAATGCTCGTATCAAGTTATTAGATGAATGA

>Medtr5g033260

ATGCAAGAATTCACAGTTGTAATTGTAGGTGCTGGTCCTTCTGGCCTTGCAATTTCTG  
CTTGCCTAACACAAAACCTCCATCTCTCATATCATACTCGAAA  
AAGATGATTGTTGTGCTTCTCTTTGGAGGAAAAATGCATATGATCGTTTAAACCTTCAC  
TTGGCTAGTGAGTTTTGCTCTTTACCCCTCATGCCTCACCC  
ACCCTCAGGCCCAACCTACCTATCGAAATACCAATTCCTTCAATACATAGACAAATATG  
TCGCCCATTTCAACATAAAATCTCACTATTGTGCGCACAGTT  
GAGTCTGCTAAGTATGACGAGATTAGAAGCGAATGGAGGGTTGAAACAAAGAACACA  
ATAGAAGGGATATTGGAAGTTTATGAGGCGAAGTTTCTTGTGA  
TCGCCACCGGCGAAAATAGTGAAGGTTATATTCCTAATGTGCCTGGACTGAATAACTT  
TGAAGGAGAGGTGGTACACTCCAAAATTACAAATCTGGTTC  
AAAATATAAAACAAAAGAGGTTTTGGTAGTTGGATGTGGTAACTCAGGAATGGAGATT  
GCTTATGACCTCCATAACTCGGGTGCTAACCCATCTATTGTG  
GTTCGAAGTCCGTTTCATGTCTTCAATAGAGAAATAATTCACCAAGGGATGCGAATGG  
TGAATATTTTTCGGTTGGTGTGTGGATACTATCATTACTC  
TATGGGCAAACTAAAATATGGTGATTGTCTAAGTATGGGATTTATCGTCCTAAATTG  
GGACCTTTCAATCTTAAGAATGTGACAGGAAAGTCTGCAGT  
TATTGATGTTGGAACCGTTGAAAAGATTAAGGAGGGGTCTATAAAGGTTGTTTCTTCA  
TATATTACGAGAATTGAGAAAAAGAAAGTTGTATTTGAAAAC  
AACATGAAAAAGAGTTTGATGCGATCGTTTTTGCAACTGGCTACAAAAGCATAGCTA  
ATGGGTGGCTTAAGGATTACAAATATGCTCTTAATGAGAAAG  
GGATGCCAAAAAATGCTTACCCGAGTCATTGGAAGGGGGATCATGGATTGTACTGTG  
CAGGACTGGCAAGGAGAGGCTTGTGCGGGAGTCAAATAGATGC  
AGAGTCAATTGCAGAGGACATCAACCAAACCTTTTAATTTTCATAATTAA

>Medtr6g086870

ATGGCACATGATCATCAAAGAAGGATAGCATGGGAAAATCAAGATTGGTTCATGGAC  
CAATTATAGTTGGAGCTGGTCCCTCAGGATTAGCAGCAGCAG  
CATGTCTTAAACAAAAGGAATTCCAAGTCAAATCCTTGAAAGAGCTAATTGTTTAGCT  
TCAATGTGGCAACTCAAACCTTATGATAGATTAAGGCTTCA  
TCTTCAAAGCAATTTTGTCAACTTCCTCTTATGCCATTTCCAAAAGGGTTACCATCAT  
ATCCAACAAAGCAACAATTTTTATCTTACTTAAAGGCTTAT  
GCTGATCACTTTGATATAAATCCTATTTTTGGCAAACAAGTGGTGAATGCTGAATTTGA  
TGTTGTTTGTGGATTTTGAAGATTAAAACCTCAAGAAATTA  
TGAAAAATGGTGATGAAATTATTATTGAATATTTATGTAAATGGTTGATTGTTGCTAGTG  
GTGAAAATGCTGAGGAAGTTGTGCCTCAAATTGAAGGGAT  
GGAACAATTTCAAGGACCAATTTTGCATACTAGTTTGTATAAGAGTGGTAGCATGTTTT  
GTGGCAAGAATGTTTTGGTGGTGGGGTGTGGAATTCAGGT  
ATGGAGGTTTGTAGACCTTTGCAACCATAATGCTCATCCATCCTTAGTGGTTAGAG  
ATACGGTGCATATCTTGCCACAACAATATTTGGGAAATCAA  
CTTTTGGTTTATCTATGTGGTTGCTTAAATGGTTCTCTGTTCAATTTGTGGATAAATTTT  
TACTTCTAATGTCAGATCTTATTCTTGGAGATACATCTCA  
ATTTGGAATTGAAAGACCAAAAATTGGTCCTTTAGAGCTTAAGAAGTGTACGGCAAG

ACACCTGTTTTGGATGTTGGGACAGTAGCTCAAATCAAACCT  
GGAAAAATTAAGGTTTGCAAGGGAATTAACGACTAGCACATAATGCAGTGGAATTTG  
TTGATGGGAAAGTGGAGAAGTTTGGATGCAATCATTCTAGCTA  
CTGGTTACAGAAGCAATGTACCCTCTTGGTTAAAGGGAAGTGACATGTTTAGTGAGA  
AAGATGGTTTTCCAAGGAAACCATTCCCAAATGGATGGAAAGG  
TGAAAAGGGACTATATGCTGTTGGTTTCACTAAACGTGGTTTGCTTGGTTCATCTATT  
GATGCAAAGAGGATTGCAGAAGATATTGAAACTAGCTGGAAA  
TCTATTAAGGCCAAGCCACTTGCATGA

>Medtr7g099160

ATGGATATGGATCTGGACGAAGAACTATTTTGGCTATACGAGAATGTACTCAAACCG  
CAAGGGCTAAAGCCGTAGAAAACCCTAACGATGATGATGTTG  
ATAACCTGTTAGACTGTGCTGGAGCTTTGCTAACTTTACATAATGTTAAGGATTTTACC  
ACATCAAAGGAGATGCTCGAAGAGGCTGTTACAAAGTTTAA  
GAAAGTTACTGAATTGAATCCCGACTTGCATCGCCCTTTTTGGGCCCTGGGAAAAAC  
ACTCACTGCACAGGCAATATTATTCTCAACCCGGGCCGAGGCT  
AAAGATCATTATGAGCTTGCATATGATTACTTTTTAAAAGCTGTTGAAAAGAATCCTAAA  
AACAACTATACCGCATATCATTGCAAGAGGCTGCTAAGA  
AAGCACCAGGGAGAGGTCCTTTTACTTCTGCTGGTTTTAAGCAATCAGCAGGGACAG  
CTGATCCTTCTTCTGCTGGTACTGAGAATGTACCAGGGACATG  
TCCTTTTTCTTCTGCTGGTACTAAGCGATCAATAGGGACAGCTGGTCTTTCTTCTTCT  
GCTGGTACTGAGGATCCTTCAAACCTACCAGATGTTGACCCA  
TTGGATGGGGATGCTAAGGTTTGTGAATCAATTGATCCTCCTGCTTCTCGATTCCATAA  
GCTACCTTGAAAATATGCTAACAAATTTGAAATCAACCCGC  
AATCAACGAGTGTGTTCAATCTGCTAAGTATGATGAAACCAGTGGATTGTGGAGGGT  
CAAGACAAATGAAGTTGAGTATATTTGTAGGTGGCTTGTGTTG  
TGCTACCGGCGAAAATGCTGAGTGTGTTACTCCTGAAATTGAAGGACTTTCTGAATTC  
AAAGGTGAAGTTGTTTATGCTTGTGATTACAAGTCAGGGAAA  
AATTTTGAAGGAAAGAAAGTTCTTGTGTTGGATGTGGAAATTCTGGAATGGAATCTCT  
CACTTGATCTTAGCAATCATCATGCTTTACCTTCCATGGTTG  
TTCGTAGCTCGGTTGATGTGCTACCAAGAGAAATATTTGGAATATCAACTTTTGAATTA  
GCGGTTATGATGTTGAAGTGGTTACCACTTTGGATTGTGGA  
CAAACTTTTGTTGATTTTGACATGGTTCATTTTGGGTGACATGGAAAAATATGGTATCA  
AAAGACCATCAATGGGTCCATTGCAGTTGAAGAACACCGTA  
GGAAAGACACCGGTTTTGGACATTGGTGCCTTGGAGAAAATTAGATCCGGTGATATA  
AATGTTGTACCTGGAATCAAAGAATTAATAAAAATGGTGAAG  
TTGAGCTTGTTAATGGTGAAAAGCTTGATATTGATGCAGTTGTTCTTGCTACTGGTTAC  
CGCAGCAATGTCCCTTCTTGGCTTCAGGAAGGTGAATTTTT  
CTCAAAAATGGATACCCAAAGATGCCATTTCCACATGGTTGGAAGGGAAATTCAGGA  
CTTTATGCTGTAGGGTTCACAAAGAGAGGGCTTTCTGGTGCT  
TCATCTGATGCTGTTAAAATTGCACAAGATATTGAAAAGTTTGGAAACAAGAGACAA  
AACAAAAGAAGCAACGCACTACTGCTTGTGCATAGACGTTGCA  
TTTCACAATTCTAA

>Medtr7g099330

ATGGAAAATTTATTTTCGTCTAGCTGATCACCAAGACTTTCTCTCACGCCGTTGCATTTG

GGTCAATGGACCTGTGATCATAGGTGCAGGTCCATCTGGTC  
TTGCAACGGCAGCATGTCTTAGAGAACAAGGGGTACCCTTCGTTGTTCTCGAAAGAG  
CTGATTGCATAGCATCACTATGGCAAAAAGAACCCTACGACAG  
ATTGAAACTTCACCTTCCAAAACAATTCTGTCAACTACCTAACCTTCCAATGCCTGAA  
GATTTCCCTGAATACCCTTCAAAGAAACAATTCATAAGCTAC  
CTTGAAAATGCTAACAATTTGAAATCAACCCGCAATTCAACGAGTGTGTTCAATC  
TGCTAAGTATGATGAAACCAGTGGATTGTGGAGGGTCAAGA  
CAAATGAAGTTGAGTATATTTGTAGGTGGCTTGTGTTGCTACCGGCGAAAATGCTGA  
GTGTGTTACTCCTGAAATTGAAGGACTTTCTGAATTCAAAGG  
TGAAGTTGTTTATGCTTGTGATTACAAGTCAGGGAAAAATTTGAAGGAAAGAAAGTT  
CTTGTTGTTGGATGTGGAATTTCTGGAATGGAACCTCACTT  
GATCTTAGCAATCATCATGCTTTACCTTCCATGGTTGTTTCGTAGCTCGGTTTCATGTGCT  
ACCAAGAGAAATATTTGGAATATCAACTTTTGAATTAGCGG  
TTATGATGTTGAAGTGGTTACCCTTTGGATTGTGGACAACTTTTGTGATTTTGACA  
TGTTTCATTTTGGGTGACATGGAAAAATATGGTATCAAAG  
ACCATCAATGGGTCCATTGCAGTTGAAGAACACCGTAGGAAAGACACCGGTTTTGGA  
CATTGGTGCCTTGGAGAAAATTAGATCCGGTGATATAAATGTT  
GTACCTGGAATCAAAGAATTAATAAAAATGGTGAAGTTGAGCTTGTTAATGGTGAAA  
AGCTTGATATTGATGCAGTTGTTCTTGCTACTGGTTACCGCA  
GCAATGTCCTTCTTGGCTTCAGGAAGGTGAATTTTTCTCAAAAATGGATACCCAAA  
GATGCCATTTCCACATGGTTGGAAGGGAATTCAGGACTTTA  
TGCTGTAGGGTTCACAAAGAGAGGGCTTTCTGGTGCTTCATCTGATGCTGTTAAAATT  
GCACAAGATATTGGAAGGTTTGGAAACAAGAGACAAAACAA  
AAGAAGCAACGCACTACTGCTTGTGCATAGACGTTGCATTTCACAATTCTAA

>Medtr8g432640

ATGCAAGAATTCACAGTTGTAATTGTAGGTGCTGGTCCTTCTGGCCTAGCAATTTTCAG  
CTTGCCTAACACAGAACTCCATCTCTCATATCATACTCGAAA  
AAGAAGATTGTTGTGCTTCTCTTTGGAGAAAAATGCTTATGATCGTTTAAATCTTCAT  
TTGGCTAGTGAGTTTTGCTCTTTACCCCTCATGCCTCACCC  
ACCCTCAGGACCAACATACCTATCCAAAGACCAATTCCTTCAATACATAGACAAATATG  
TCGAACATTTTAAATAAAACCTTGCTACTGTCGCATGGTT  
GAATCCGCTGAATACGATGAAGTTGGAAACAAATGGAGGGTTCAAACAAAGAACACA  
CAAGACGACACATTGGAGGTTTATGTGTGCAATTATCTTGTGA  
TTGCCACTGGTGAATAAGTGAAGGTTATATTCCTAATGTGCCTGGACTAGGCAACTT  
CGAAGGAGAGGTGATGCACTCCAATACTACAAATCTGGTTC  
AAAATACGAATCAAAAATGTTTTGGTAGTTGGGTGTGGTAACTCAGGAATGGAGATT  
GCTTATGACCTCCACAATTGGGGTGCTAGCGCTTCCATTGTC  
ATTCGAAATCCGCTGCATGTCTTCACTAGGGAAATGATTCACCAAGGAATGCGTATGG  
TGAAGTATTTGCCGTTTCATATTGTGGATACATACATTACTC  
TTTTGGCAAAACTAAAATATGGTGATCTGTCTAAATATGGAATTTATCGTCCCAAAGAG  
GGACCTTTACATCTCAAAAATATTACAGGAAAGTCTGCCGT  
TATTGATGTTGGAACCATTGGAAGATTAAGGAGGGTGCTATAAAGGTTGTTCTTCA  
AATATAACCAGAATTGAGAAGAAGAAAATTGTCTTTGAAAAC  
AATGTAGAAAGAGAGTTTGTGCAATTGTTTTGCTACCGGCTATAAAAAGTATAGCTAA

TGGATGGCTCAAGGACTACAAATATGCTCTTAATGATAAAG  
GAATGCCTAAAAATGCTTTCCCAAACATTGGAAGGGGGATCGTGGATTGTATTGTGG  
AGGACTTGCAAGGAGAGGCTTATGGGGAGTCAAAGTGGATGC  
TGAATCAATTGCTCAAGACATCAACCAAATCTTAATCTACATGATTAA
