# Supplementary material for: GmYUC2a mediates auxin biosynthesis during root development and nodulation in soybean
Source: PubMed Central journal article supplement — J Exp Bot. 2019 Apr 8;70(12):3165–76. doi: 10.1093/jxb/erz144 (PMC6598056; doi:10.1093/jxb/erz144), 2019-04-08
Supplement: erz144_suppl_supplementary_figures_s1-s9_tables_s1-s3.pdf [file erz144_suppl_supplementary_figures_s1-s9_tables_s1-s3.pdf]

**Fig. S1.**

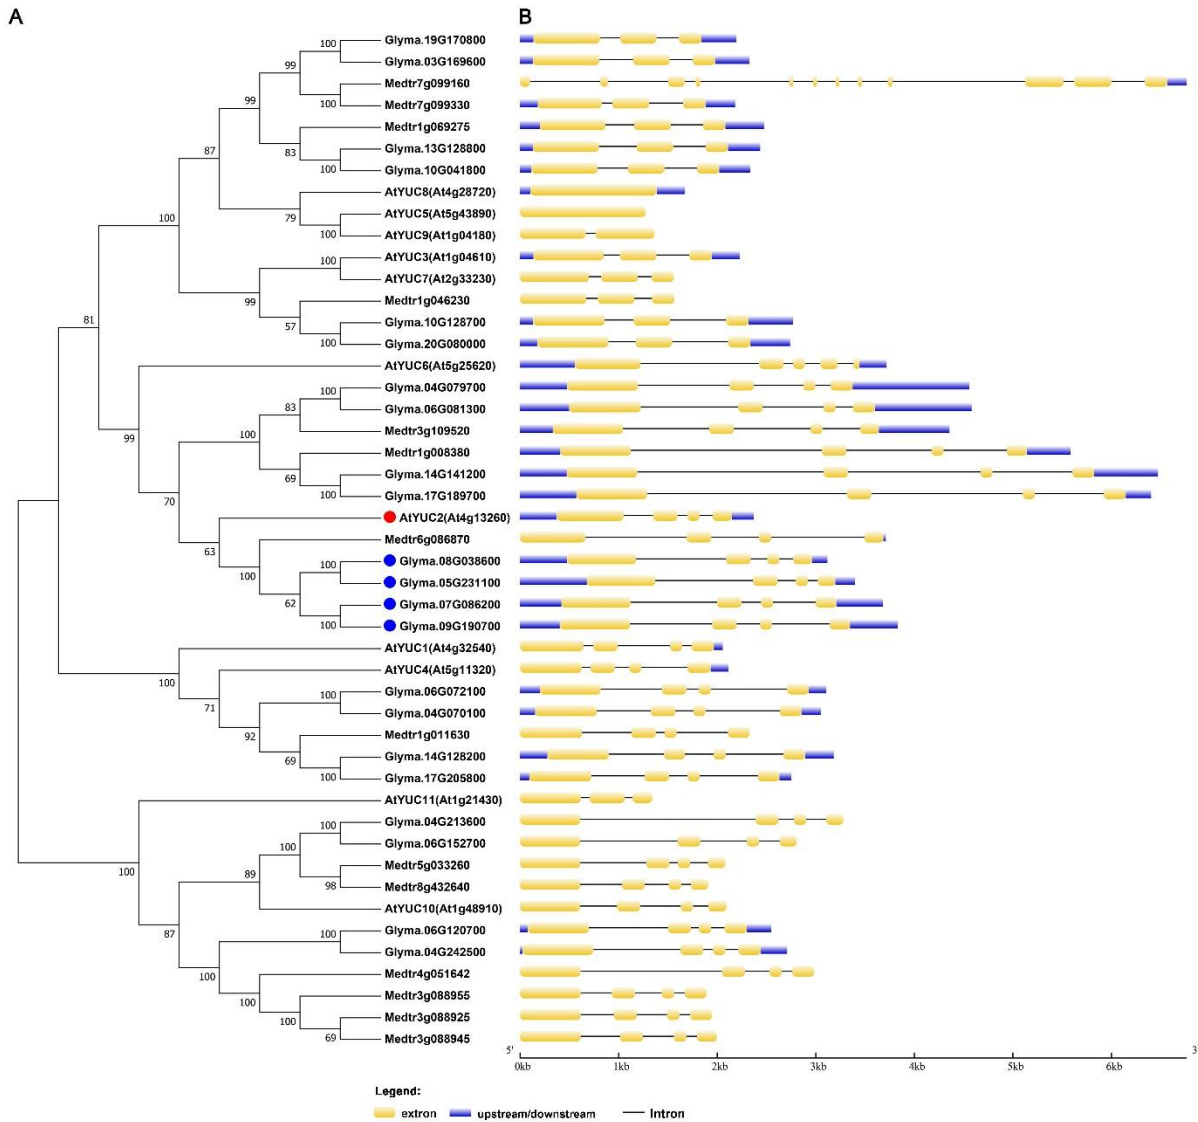

**Fig. S1.** Phylogenetic relationship of YUC family proteins and the structures of their associated genes. The phylogenetic tree (A) was made using MEGA6.0 with 1,000 bootstraps, while the gene structures (B) were constructed using the Gene Structure Display Server. All of the sequences were collected from the databases of *Arabidopsis thaliana*, *Medicago truncatula* and *Glycine max* in Phytozome.

Fig. S2.

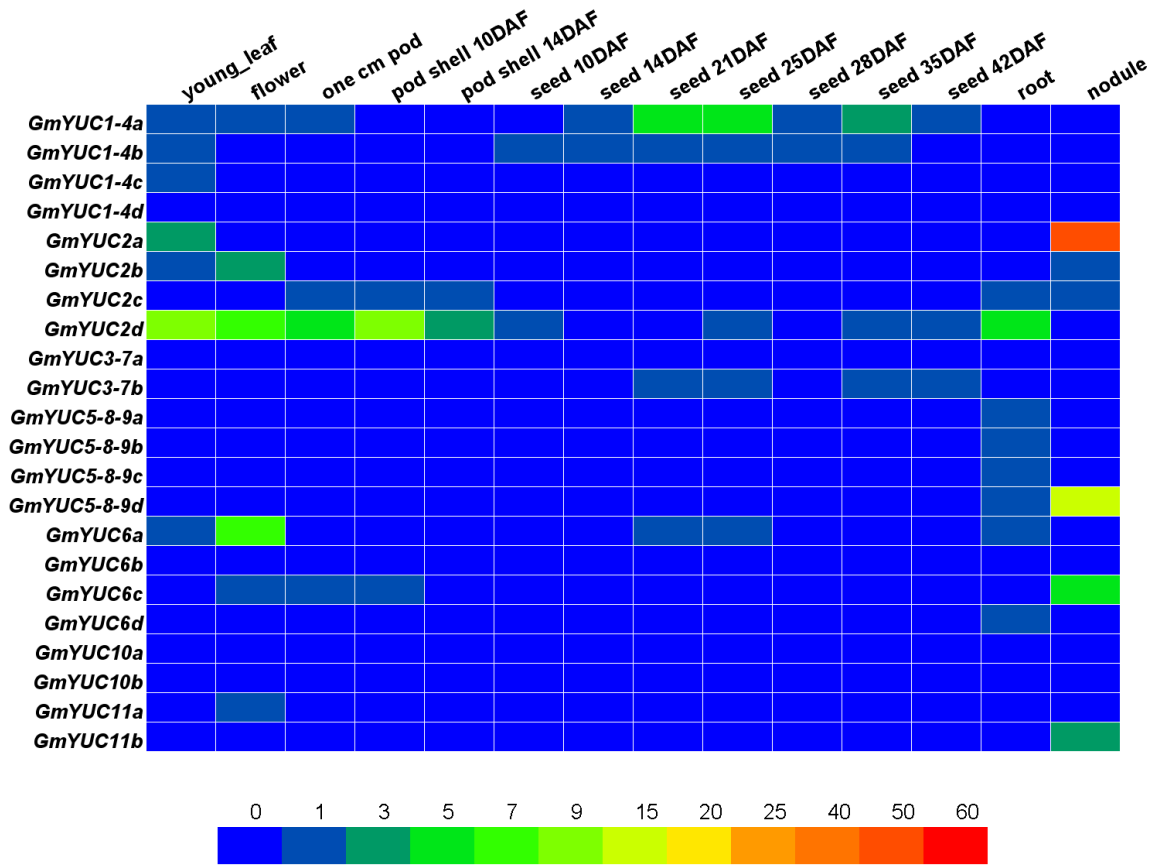

**Fig. S2.** *YUCCA* family gene expression in soybean. The data were obtained from transcriptome data available at SoyBase (<http://soybase.org/soyseq/>). A heatmap of differentially expressed *GmYUC* genes was drawn using Heatmap Illustrator (v1.0).

**Fig. S3.**

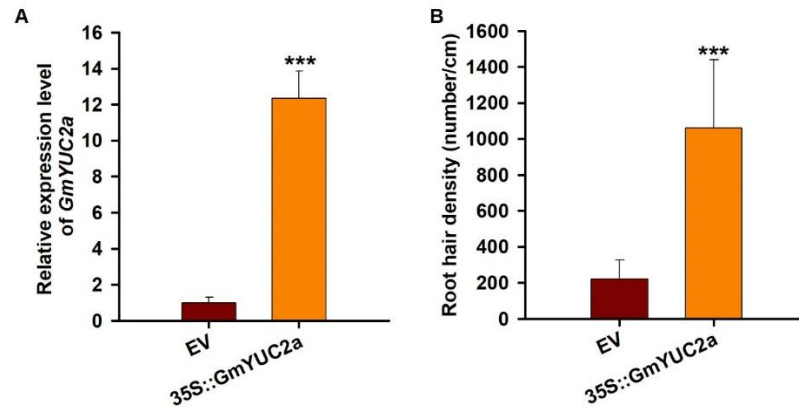

**Fig. S3.** *GmYUC2a* transcript levels and root hair density were increased in *35S::GmYUC2a* transgenic roots. (A) RT-qPCR was used to determine *GmYUC2a* transcript levels in transgenic roots expressing either the EV or *35S::GmYUC2a* at 10 days after transplantation. *GmYUC2a* expression was normalized against the geometric mean of the soybean reference gene *GmELF1b*. Statistically significant differences were identified using Student's *t*-test. (B) The root hair density of EV or *35S::GmYUC2a* at 10 days after transplantation. Three independent biological repeats were performed. Three independent biological replicates were performed using 15 hairy roots per replicate. Error bars indicate SD. Significant differences are marked with '\*\*\*' ( $P < 0.001$ ).

**Fig. S4.**

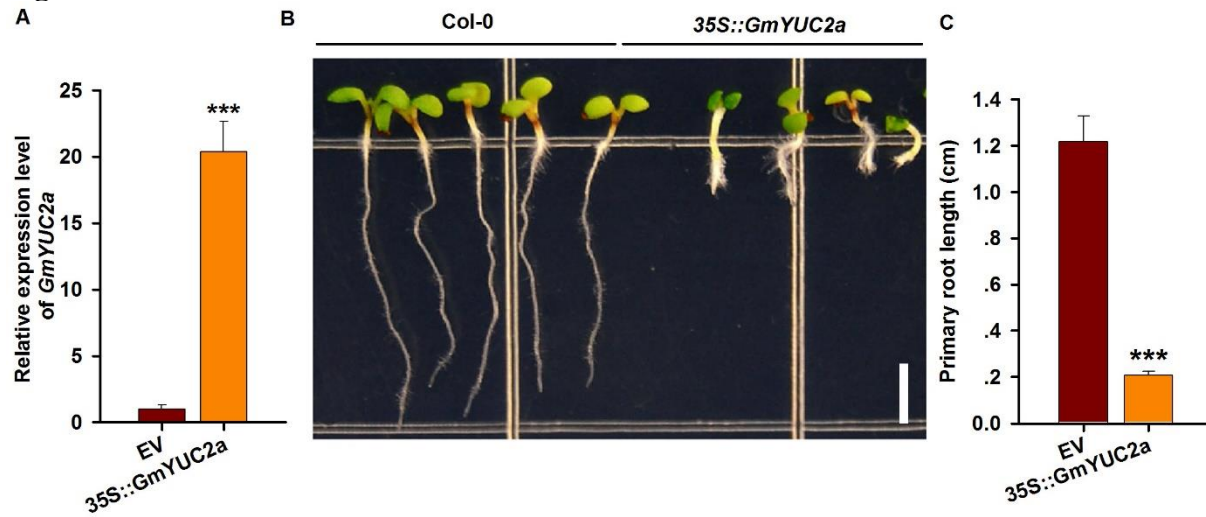

**Fig. S4.** *GmYUC2a* overexpression inhibited primary root growth in *Arabidopsis*. (A) RT-qPCR analysis of *GmYUC2a* expression in EV and 35S::*GmYUC2a* plants at 7 days after germination. *AtUBQ5* was used as the reference gene. (B) The root phenotype of *Arabidopsis* plants transformed with either EV or 35S::*GmYUC2a*. Bar=2 mm. (C) The primary root length of EV and 35S::*GmYUC2a* transgenic plants. Three independent biological repeats were performed and were conducted using 10 plants per replicate. Error bars indicate SD. Statistically significant differences were determined using Student's *t*-tests. Significant differences are marked with '\*\*\*' ( $P < 0.001$ ).

**Fig. S5.**

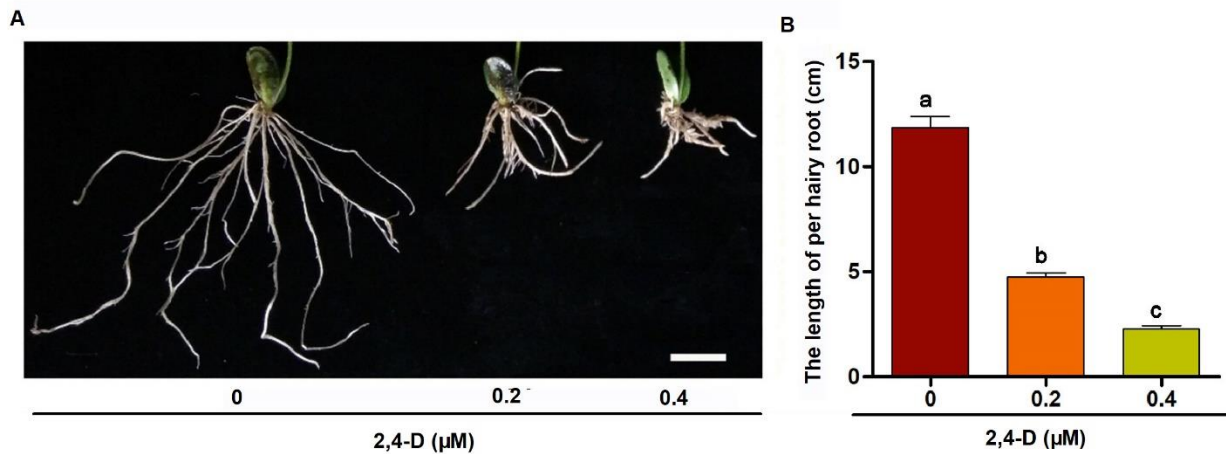

**Fig. S5.** Hairy root development was affected by 2,4-D treatment. (A) The hairy root phenotype of transgenic composite plants harboring empty vector treated with different concentrations of 2,4-D. Bar=2 mm. (B) The length of per. hairy root was counted (n=10). The data shown are the averages  $\pm$  standard deviation. Three independent biological repeats were performed. Student's *t*-test was used for significant difference analysis. Different letters indicate significant differences by the Student-Newman-Kuels test ( $P<0.05$ ).

**Fig. S6.**

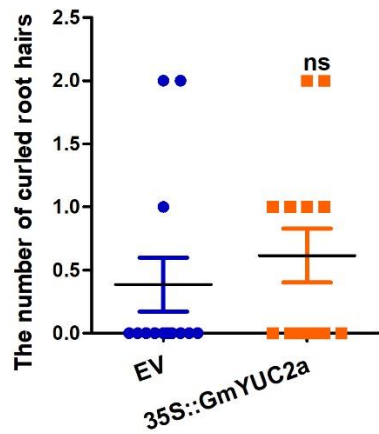

**Fig. S6.** *GmYUC2a* overexpression did not lead to root hair deformation without rhizobial inoculation. At 15 days, 2-cm root segments of transgenic hairy roots having EV or *35S::GmYUC2a* below root-hypocotyl junction were cut and stained with 1% (w/v) methylene blue. The number of considerably deformed root hairs were estimated (n=10).

**Fig. S7.**

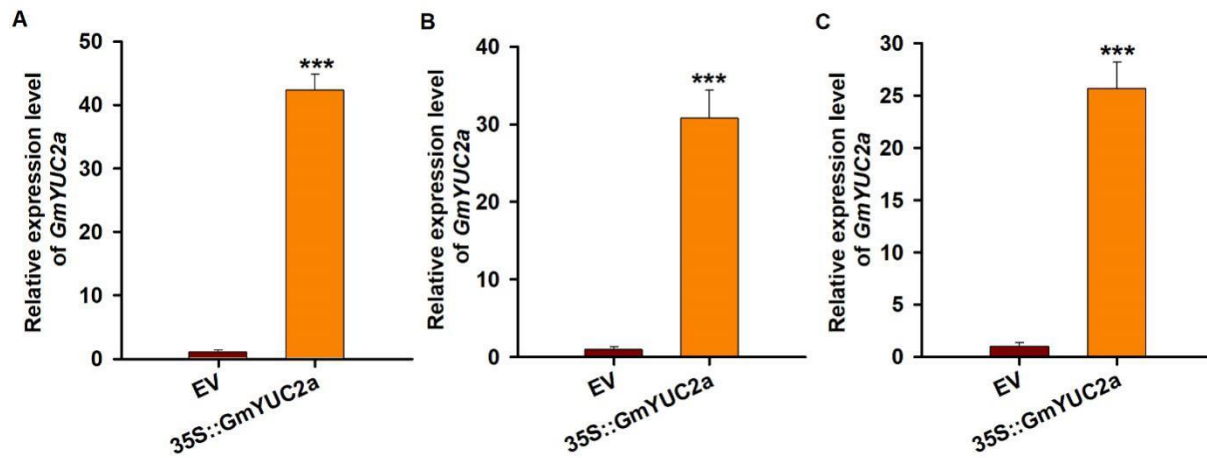

**Fig. S7.** *GmYUC2a* expression in EV or 35S::*GmYUC2a* transgenic roots of soybean. RT-qPCR analysis of *GmYUC2a* transcription in transgenic roots expressing either the EV or 35S::*GmYUC2a* at 3 DAI(A), 6 DAI(B) and 10 DAI(C). The housekeeping gene *GmELF1b* was used as a reference gene. Three independent biological repeats were performed. Error bars indicate SD. Statistically significant differences were identified using Student's *t*-tests. Significant differences are marked with '\*\*\*' ( $P < 0.001$ ).

**Fig. S8.**

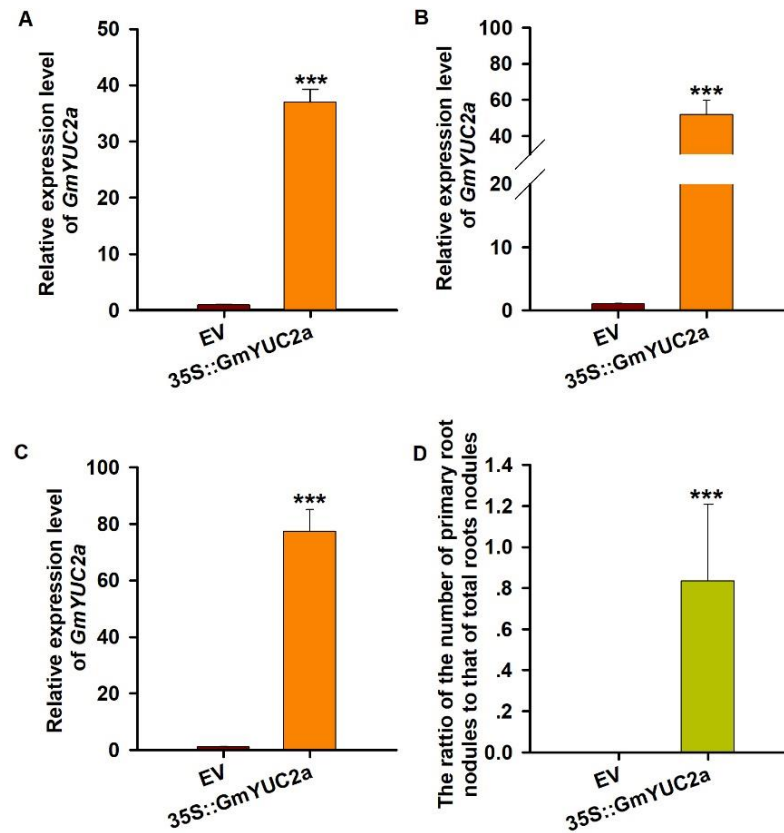

**Fig. S8.** *GmYUC2a* transcription in transgenic roots having EV or 35S::*GmYUC2a*. (A-C) RT-qPCR analysis of *GmYUC2a* transcription in transgenic roots expressing either the EV or 35S::*GmYUC2a* at 10 (A), 17 (B), and 28 DAI (C). (D) The ratio of the number of primary root nodules to that of total nodules were estimated at 17 DAI (n=10). The housekeeping gene *GmELF1b* was used as a reference gene. We repeated it using three independent biological repeats. Error bars indicate SD. Statistically significant differences were identified using Student's *t*-tests. Significant differences are marked with '\*\*\*' ( $P < 0.001$ ).



**Fig. S9.**

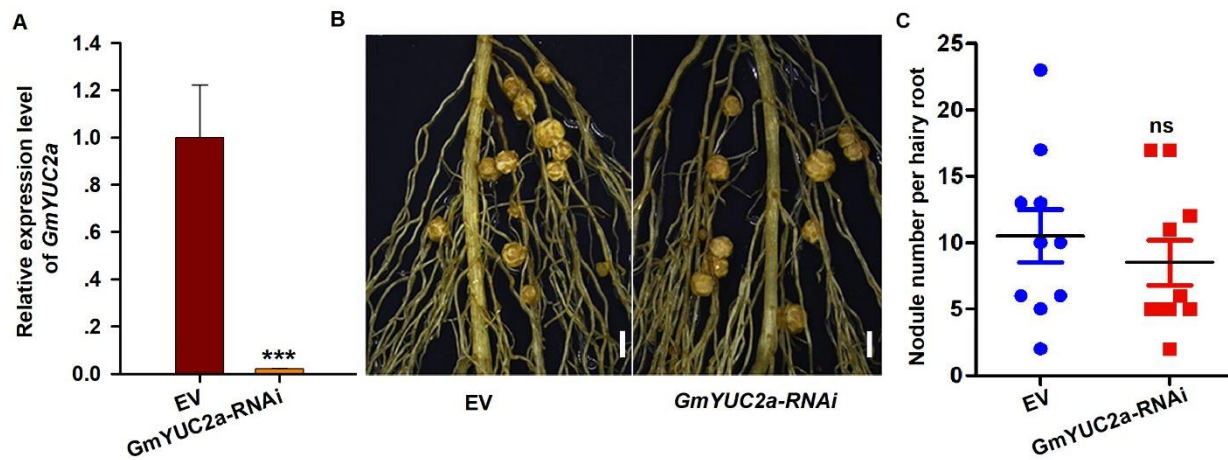

**Fig. S9.** *GmYUC2a* silencing did not affect nodule development. (A) The expression level of *GmYUC2a* in transgenic hairy roots carrying the EV or *GmYUC2a*-RNAi at 28 DAI. *GmELF1b* was used as a reference gene. (B) The nodule phenotype of transgenic hairy roots expressing EV or *GmYUC2a*-RNAi. Bar=2 mm. (C) The nodule number in transgenic roots harboring the EV or *GmYUC2a*-RNAi at 28 DAI. Three independent biological repeats were performed (n = 15 hairy roots per replicate). Error bars indicated SD. Student's *t*-test was used to determine significance. \*\*\*  $P < 0.001$ . ns, not significant,  $P > 0.05$ .

**Table S1.** The *YUC* family genes in *Glycine max*.

|                | Gene            | Description in Phytozome                            | PFAM                                          |
|----------------|-----------------|-----------------------------------------------------|-----------------------------------------------|
| AtYUC1         | At4g32540       | YUC1                                                | Pyridine nucleotide-disulphide oxidoreductase |
| GmYUC1-4a      | Glyma.04g070100 | INDOLE-3-PYRUVATE MONOOXYGENASE YUCCA2-RELATED      | Flavin-binding monoxygenase-like              |
| GmYUC1-4b      | Glyma.17g205800 | INDOLE-3-PYRUVATE MONOOXYGENASE YUCCA2-RELATED      | Flavin-binding monoxygenase-like              |
| GmYUC1-4c      | Glyma.06g072100 | INDOLE-3-PYRUVATE MONOOXYGENASE YUCCA2-RELATED      | Flavin-binding monoxygenase-like              |
| GmYUC1-4d      | Glyma.14g128200 | INDOLE-3-PYRUVATE MONOOXYGENASE YUCCA2-RELATED      | Flavin-binding monoxygenase-like              |
| MedtrYUC1-4    | Medtr1g011630   | indole-3-pyruvate monoxygenase                      | Flavin-binding monoxygenase-like              |
| AtYUC2         | At4g13260       | YUC2                                                | Flavin-binding monoxygenase-like              |
| GmYUC2a        | Glyma.08g038600 | DIMETHYLANILINE MONOOXYGENASE                       | Pyridine nucleotide-disulphide oxidoreductase |
| GmYUC2b        | Glyma.05g231100 | DIMETHYLANILINE MONOOXYGENASE                       | Pyridine nucleotide-disulphide oxidoreductase |
| GmYUC2c        | Glyma.07g086200 | DIMETHYLANILINE MONOOXYGENASE                       | Flavin-binding monoxygenase-like              |
| GmYUC2d        | Glyma.09g190700 | DIMETHYLANILINE MONOOXYGENASE                       | Flavin-binding monoxygenase-like              |
| MedtrYUC2      | Medtr6g086870   | indole-3-pyruvate monoxygenase                      | Flavin-binding monoxygenase-like              |
| AtYUC3         | At1g04610       | YUC3                                                | Flavin-binding monoxygenase-like              |
| GmYUC3-7a      | Glyma.10g128700 | INDOLE-3-PYRUVATE MONOOXYGENASE YUCCA3-RELATED      | Flavin-binding monoxygenase-like              |
| GmYUC3-7b      | Glyma.20g080000 | INDOLE-3-PYRUVATE MONOOXYGENASE YUCCA3-RELATED      | Flavin-binding monoxygenase-like              |
| MedtrYUC3-7    | Medtr1g046230   | indole-3-pyruvate monoxygenase YUCCA8               | Pyridine nucleotide-disulphide oxidoreductase |
| AtYUC4         | At5g11320       | YUC4                                                | Flavin-binding monoxygenase-like              |
| AtYUC5         | At5g43890       | YUC5                                                | Pyridine nucleotide-disulphide oxidoreductase |
| GmYUC5-8-9a    | Glyma.10g041800 | INDOLE-3-PYRUVATE MONOOXYGENASE YUCCA5-RELATED      | Pyridine nucleotide-disulphide oxidoreductase |
| GmYUC5-8-9b    | Glyma.13g128800 | INDOLE-3-PYRUVATE MONOOXYGENASE YUCCA5-RELATED      | Pyridine nucleotide-disulphide oxidoreductase |
| GmYUC5-8-9c    | Glyma.03g169600 | INDOLE-3-PYRUVATE MONOOXYGENASE YUCCA5-RELATED      | Pyridine nucleotide-disulphide oxidoreductase |
| GmYUC5-8-9d    | Glyma.19g170800 | INDOLE-3-PYRUVATE MONOOXYGENASE YUCCA5-RELATED      | Pyridine nucleotide-disulphide oxidoreductase |
| MedtrYUC5-8-9a | Medtr7g099160   | flavin containing monoxygenase YUCCA8-like protein  | Flavin-binding monoxygenase-like              |
| MedtrYUC5-8-9b | Medtr7g099330   | indole-3-pyruvate monoxygenase                      | Pyridine nucleotide-disulphide oxidoreductase |
| MedtrYUC5-8-9c | Medtr1g069275   | indole-3-pyruvate monoxygenase                      | Pyridine nucleotide-disulphide oxidoreductase |
| AtYUC6         | At5g25620       | YUC6                                                | Pyridine nucleotide-disulphide oxidoreductase |
| GmYUC6a        | Glyma.04g079700 | INDOLE-3-PYRUVATE MONOOXYGENASE YUCCA2-RELATED      | Flavin-binding monoxygenase-like              |
| GmYUC6b        | Glyma.17g189700 | INDOLE-3-PYRUVATE MONOOXYGENASE YUCCA2-RELATED      | Flavin-binding monoxygenase-like              |
| GmYUC6c        | Glyma.06g081300 | INDOLE-3-PYRUVATE MONOOXYGENASE YUCCA2-RELATED      | Flavin-binding monoxygenase-like              |
| GmYUC6d        | Glyma.14g141200 | INDOLE-3-PYRUVATE MONOOXYGENASE YUCCA2-RELATED      | Flavin-binding monoxygenase-like              |
| MedtrYUC6a     | Medtr3g109520   | indole-3-pyruvate monoxygenase YUCCA8               | Flavin-binding monoxygenase-like              |
| MedtrYUC6b     | Medtr1g008380   | indole-3-pyruvate monoxygenase                      | Flavin-binding monoxygenase-like              |
| AtYUC7         | At2g33230       | YUC7                                                | Flavin-binding monoxygenase-like              |
| AtYUC8         | At4g28720       | YUC8                                                | Pyridine nucleotide-disulphide oxidoreductase |
| AtYUC9         | At1g04180       | YUC9                                                | L-lysine 6-monoxygenase (NADPH-requiring)     |
| AtYUC10        | At1g48910       | YUC10                                               | Flavin-binding monoxygenase-like              |
| GmYUC10a       | Glyma.06g152700 | INDOLE-3-PYRUVATE MONOOXYGENASE YUCCA10-RELATED     | Flavin-binding monoxygenase-like              |
| GmYUC10b       | Glyma.04g213600 | INDOLE-3-PYRUVATE MONOOXYGENASE YUCCA10-RELATED     | Flavin-binding monoxygenase-like              |
| MedtrYUC10a    | Medtr5g033260   | flavin containing monoxygenase YUCCA10-like protein | Flavin-binding monoxygenase-like              |
| MedtrYUC10b    | Medtr8g432640   | flavin containing monoxygenase YUCCA10-like protein | Flavin-binding monoxygenase-like              |
| AtYUC11        | At1g21430       | YUC11                                               | Flavin-binding monoxygenase-like              |
| GmYUC11a       | Glyma.06g120700 | INDOLE-3-PYRUVATE MONOOXYGENASE YUCCA11-RELATED     | Flavin-binding monoxygenase-like              |
| GmYUC11b       | Glyma.04g242500 | INDOLE-3-PYRUVATE MONOOXYGENASE YUCCA11-RELATED     | Flavin-binding monoxygenase-like              |
| MedtrYUC11a    | Medtr4g051642   | flavin containing monoxygenase YUCCA10-like protein | Flavin-binding monoxygenase-like              |
| MedtrYUC11b    | Medtr3g088955   | flavin containing monoxygenase YUCCA10-like protein | Flavin-binding monoxygenase-like              |
| MedtrYUC11c    | Medtr3g088925   | flavin containing monoxygenase YUCCA10-like protein | Flavin-binding monoxygenase-like              |
| MedtrYUC11d    | Medtr3g088945   | flavin containing monoxygenase YUCCA10-like protein | Flavin-binding monoxygenase-like              |

**Table S2.** The expression data of *GmYUC* family genes in different tissues of soybean (RPKM Normalized data).

|             |                                 | young_l<br>leaf | flower | one cm<br>pod | pod shell<br>10DAF | pod shell<br>14DAF | seed<br>10DAF | seed<br>14DAF | seed<br>21DAF | seed<br>25DAF | seed<br>28DAF | seed<br>35DAF | seed<br>42DAF | root | nodule |
|-------------|---------------------------------|-----------------|--------|---------------|--------------------|--------------------|---------------|---------------|---------------|---------------|---------------|---------------|---------------|------|--------|
| GmYUC1-4a   | Glyma.04g070100 (Glyma04g07450) | 1               | 2      | 2             | 0                  | 0                  | 0             | 2             | 5             | 5             | 2             | 3             | 1             | 0    | 0      |
| GmYUC1-4b   | Glyma.17g205800 (Glyma17g30920) | 1               | 0      | 0             | 0                  | 0                  | 1             | 1             | 2             | 1             | 1             | 1             | 0             | 0    | 0      |
| GmYUC1-4c   | Glyma.06g072100 (Glyma06g07570) | 1               | 0      | 0             | 0                  | 0                  | 0             | 0             | 0             | 0             | 0             | 0             | 0             | 0    | 0      |
| GmYUC1-4d   | Glyma.14g128200 (Glyma14g15820) | 0               | 0      | 0             | 0                  | 0                  | 0             | 0             | 0             | 0             | 0             | 0             | 0             | 0    | 0      |
| GmYUC2a     | Glyma.08g038600 (Glyma08g04310) | 3               | 0      | 0             | 0                  | 0                  | 0             | 0             | 0             | 0             | 0             | 0             | 0             | 0    | 60     |
| GmYUC2b     | Glyma.05g231100 (Glyma05g35430) | 1               | 3      | 0             | 0                  | 0                  | 0             | 0             | 0             | 0             | 0             | 0             | 0             | 0    | 2      |
| GmYUC2c     | Glyma.07g086200 (Glyma07g09500) | 0               | 0      | 2             | 1                  | 1                  | 0             | 0             | 0             | 0             | 0             | 0             | 0             | 1    | 1      |
| GmYUC2d     | Glyma.09g190700 (Glyma09g32320) | 9               | 8      | 6             | 10                 | 4                  | 1             | 0             | 0             | 1             | 0             | 1             | 1             | 5    | 0      |
| GmYUC3-7a   | Glyma.10g128700 (Glyma10g25760) | 0               | 0      | 0             | 0                  | 0                  | 0             | 0             | 0             | 0             | 0             | 0             | 0             | 0    | 0      |
| GmYUC3-7b   | Glyma.20g080000 (Glyma20g20180) | 0               | 0      | 0             | 0                  | 0                  | 0             | 0             | 1             | 1             | 0             | 2             | 2             | 0    | 0      |
| GmYUC5-8-9a | Glyma.10g041800 (Glyma10g04760) | 0               | 0      | 0             | 0                  | 0                  | 0             | 0             | 0             | 0             | 0             | 0             | 0             | 2    | 0      |
| GmYUC5-8-9b | Glyma.13g128800 (Glyma13g19100) | 0               | 0      | 0             | 0                  | 0                  | 0             | 0             | 0             | 0             | 0             | 0             | 0             | 1    | 0      |
| GmYUC5-8-9c | Glyma.03g169600 (Glyma03g32670) | 0               | 0      | 0             | 0                  | 0                  | 0             | 0             | 0             | 0             | 0             | 0             | 0             | 2    | 0      |
| GmYUC5-8-9d | Glyma.19g170800 (Glyma19g35420) | 0               | 0      | 0             | 0                  | 0                  | 0             | 0             | 0             | 0             | 0             | 0             | 0             | 1    | 19     |
| GmYUC6a     | Glyma.04g079700 (Glyma04g08440) | 1               | 7      | 0             | 0                  | 0                  | 0             | 0             | 1             | 1             | 0             | 0             | 0             | 2    | 0      |
| GmYUC6b     | Glyma.17g189700 (Glyma17g25630) | 0               | 0      | 0             | 0                  | 0                  | 0             | 0             | 0             | 0             | 0             | 0             | 0             | 0    | 0      |
| GmYUC6c     | Glyma.06g081300 (Glyma06g08560) | 0               | 2      | 1             | 1                  | 0                  | 0             | 0             | 0             | 0             | 0             | 0             | 0             | 0    | 5      |
| GmYUC6d     | Glyma.14g141200 (Glyma14g20670) | 0               | 0      | 0             | 0                  | 0                  | 0             | 0             | 0             | 0             | 0             | 0             | 0             | 1    | 0      |
| GmYUC10a    | Glyma.06g152700 (Glyma06g15810) | 0               | 0      | 0             | 0                  | 0                  | 0             | 0             | 0             | 0             | 0             | 0             | 0             | 0    | 0      |
| GmYUC10b    | Glyma.04g213600 (Glyma04g39160) | 0               | 0      | 0             | 0                  | 0                  | 0             | 0             | 0             | 0             | 0             | 0             | 0             | 0    | 0      |
| GmYUC11a    | Glyma.06g120700 (Glyma06g12650) | 0               | 1      | 0             | 0                  | 0                  | 0             | 0             | 0             | 0             | 0             | 0             | 0             | 0    | 0      |
| GmYUC11b    | Glyma.04g242500 (Glyma04g42140) | 0               | 0      | 0             | 0                  | 0                  | 0             | 0             | 0             | 0             | 0             | 0             | 0             | 0    | 3      |

Collected from Severin et al., 2010.

**Table S3.** Primers used in this study. The references are listed if the primers were previously reported.

| Primers Name                       | Forward Primer                   | Reverse Primer                    | Comments            |
|------------------------------------|----------------------------------|-----------------------------------|---------------------|
| <i>GmYUC2apro::GUS</i>             | CGGGATCCTACACGACATGGCCCTAACTA    | GAAGATCTTGCACAAGGTCATGACAACGT     |                     |
| <i>35S::GmYUC2a</i>                | TCCCCGGGATGGAGTACTTGAAGGAAGTGGA  | CGGGATCCCTACACACGCGTGGTATTAGC     |                     |
| <i>GmYUC2a-RNAi</i>                | GGTACCAC TAGTTCTCTAAACGTGGCCTCTT | GAGCTCGGATCCCTACACACGCGTGGTATTAGC |                     |
| <i>qRT-GmYUC2a</i>                 | GTTGAGGTAAGATGGGTAAAAATGACAAG    | CATAAGTCTTGAGCTGCCACATTGAAG       |                     |
| <i>qRT-GmNIN (Glyma04G00210)</i>   | CATCTTGAGCCTCTACCACC             | GCTTTGACTCTAAAAGTGCCGG            | Turner et al., 2013 |
| <i>qRT-GmTIR1C (Glyma19G39420)</i> | GGTGACAAGGCCCTTTTG               | CTCACCGAGCAGGAGGAC                |                     |
| <i>qRT-GmARF8a (Glyma02G40650)</i> | ACAGCCACAAGCCCAAGTAATG           | TGTCTCCTGGACTTGGACCA              | Wang et al., 2015   |
| <i>qRT-GmIAA1 (Glyma10G32330)</i>  | GGTTATAAGGGATCTGACTATGAACC       | CAACCCAAACCCCTTGCC                | Turner et al., 2013 |
| <i>qRT-GmIAA14 (Glyma10G32340)</i> | GACAAATGAGCATGGTCTGAGTT          | CTTCCTTGGTCTGAAGATTAAGC           | Turner et al., 2013 |
| <i>qRT-GmIAA20 (Glyma19G40970)</i> | TCTCTCACTCAAGAACTCCC             | CACAAAAGGGTGGTGTGATTG             | Turner et al., 2013 |
| <i>qRT-ELF1b</i>                   | GTTGAAAAGCCAGGGGACA              | TCTTACCCCTTGAGCGTGG               | Jian et al., 2008   |
| <i>qRT-AtUBQ5</i>                  | AAGAAGACTTACACCAAGCCG            | CCTCAAACGCTGAACCTTTC              |                     |
| <i>Hy</i>                          | TACACAGCCATCGGTCCAGA             | TAGGAGGGCGTGGATATGTC              |                     |
| <i>Bar</i>                         | AAGGATAGTGGGATTGTGCG             | AGTCGGGAAACCTGTCGTG               |                     |
